# Supplementary material for: Function of hTim8a in complex IV assembly in neuronal cells provides insight into pathomechanism underlying Mohr-Tranebjærg syndrome
Source: eLife. 2019 Nov 4;8:e48828. doi: 10.7554/eLife.48828 (PMC6861005; doi:10.7554/eLife.48828)
Supplement: Figure 2—source data 1. [file elife-48828-fig2-data1.xlsx]

## Sheet: Tim9 Tim8a HEK293; Tim8aSHSY5Y 
id	Peptides	Unique peptides	Sequence coverage [%]	Mol. weight [kDa]	Q-value	Score	Intensity	MS/MS count	Protein IDs	Majority protein IDs	Protein names	Gene names	IMPI mito. category	Mitocarta 2.0	Diff. Log2 TIMM8A/HEK293T-CONTROL	-Log10 p-value	FDR<5%	FDR	Test statistic	Diff. Log2 TIMM9/ HEK293T-CONTROL	-Log10 p-value	FDR<5%	FDR	Test statistic	Diff. Log22 TIMM8A/SH-SY5Y-CONTROL	-Log10 p-value	FDR<5%	FDR	Test statistic	Log2 LFQ 01-HEK293T-CONTROL	Log2 LFQ 02-HEK293T-CONTROL	Log2 LFQ 03-HEK293T-CONTROL	Log2 LFQ 04-HEK293T-TIMM8A	Log2 LFQ 05-HEK293T-TIMM8A	Log2 LFQ 06-HEK293T-TIMM8A	Log2 LFQ 07-HEK293T-TIMM9	Log2 LFQ 08-HEK293T-TIMM9	Log2 LFQ 09-HEK293T-TIMM9	Log2 LFQ 10-SH5Y-CONTROL	Log2 LFQ 11-SH5Y-CONTROL	Log2 LFQ 12-SH5Y-CONTROL	Log2 LFQ 13-SH5Y-TIMM8A	Log2 LFQ 14-SH5Y-TIMM8A	Log2 LFQ 15-SH5Y-TIMM8A
33	4	4	35.5	8.496	0	9.4725	1724100000	19	P62308;A8MWD9	P62308;A8MWD9	Small nuclear ribonucleoprotein G;Putative small nuclear ribonucleoprotein G-like protein 15	SNRPG;SNRPGP15			-1.91931	1.29393	+	0.0193333	-1.73357	NaN	NaN		NaN	NaN	2.00978	1.51914	+	0.0315385	1.80872	25.7678	26.5311	24.9802	23.5911	24.0896	NaN	NaN	NaN	NaN	27.2692	27.0372	27.048	27.9485	29.9627	29.4726
4725	11	11	64.8	20.505	0	42.162	4335100000	69	Q9UBQ0;Q9UBQ0-2	Q9UBQ0;Q9UBQ0-2	Vacuolar protein sorting-associated protein 29	VPS29			-1.88383	0.9987	+	0.0356364	-1.3604	-0.996661	0.248682		0.137141	-0.488127	0.660428	1.12709		0.0556193	0.851542	29.3204	26.3774	28.4168	26.202	26.4024	25.8587	NaN	28.4579	25.6252	28.4096	28.412	28.4581	28.5968	29.1156	29.5486
2811	2	2	6.2	37.554	0.00043831	3.665	108150000	13	Q5W0Z9-4;Q5W0Z9-3;Q5W0Z9;Q5W0Z9-2	Q5W0Z9-4;Q5W0Z9-3;Q5W0Z9;Q5W0Z9-2	Probable palmitoyltransferase ZDHHC20	ZDHHC20			-1.83332	1.20672	+	0.0196667	-1.51018	-2.54552	2.26598	+	0.0127059	-2.63777	NaN	NaN		NaN	NaN	24.205	23.3652	23.5342	21.4593	20.9741	23.1711	20.598	21.9018	20.968	NaN	NaN	NaN	NaN	NaN	NaN
2657	18	16	28.5	101.74	0	56.048	1969000000	43	Q3SY69;Q3SY69-3;Q3SY69-2	Q3SY69	Mitochondrial 10-formyltetrahydrofolate dehydrogenase	ALDH1L2	Known	+	-1.69869	3.199	+	0	-2.51609	-3.05072	4.20683	+	0	-4.52643	NaN	NaN		NaN	NaN	27.9387	28.0267	27.9647	26.2269	26.6002	26.0069	25.0614	25.1321	24.5844	NaN	NaN	NaN	NaN	NaN	NaN
2368	6	6	84.1	6.9151	0	22.812	3119100000	48	Q14061	Q14061	Cytochrome c oxidase copper chaperone	COX17	Known	+	-1.58153	0.63913		0.0540347	-0.978419	-0.742284	0.234467		0.180443	-0.425643	-1.61488	1.52687	+	0.0554	-1.63407	26.4303	23.3491	23.3365	22.1619	22.5897	23.6197	22.6228	24.9722	23.2941	30.247	29.1654	30.2015	28.6381	27.5842	28.5469
830	22	22	18.6	198.04	0	76.952	3035400000	67	P07942	P07942	Laminin subunit beta-1	LAMB1			-1.54598	3.1641	+	0	-2.33271	0.527944	1.35852	+	0.0391168	0.774567	-0.261096	0.878194		0.274237	-0.408956	27.7921	27.4009	27.3658	25.8677	25.9039	26.1492	27.8095	28.1879	28.1452	26.7513	26.3548	26.5139	26.2654	26.1532	26.4182
3290	15	14	17.1	128.04	0	47.71	883580000	51	Q8NB49-3;Q8NB49-2;Q8NB49-4;Q8NB49;Q9Y2G3	Q8NB49-3;Q8NB49-2;Q8NB49-4;Q8NB49	Phospholipid-transporting ATPase IG	ATP11C			-1.42162	2.27	+	0.0130526	-1.87291	-0.806593	2.44393	+	0.0158158	-1.27691	NaN	NaN		NaN	NaN	25.5731	25.4814	25.7511	23.847	24.0319	24.6619	24.6849	25.0056	24.6953	NaN	NaN	NaN	NaN	NaN	NaN
3514	7	7	36	42.835	0	25.694	941090000	12	Q92597;Q92597-3;Q92597-2	Q92597;Q92597-3;Q92597-2	Protein NDRG1	NDRG1			-1.41732	2.7421	+	0.00953846	-2.04684	-1.5514	2.04966	+	0.0117	-2.05477	NaN	NaN		NaN	NaN	26.3979	26.7611	27.0293	25.4313	25.257	25.2481	25.049	25.307	NaN	NaN	NaN	NaN	NaN	NaN	NaN
1651	11	11	38.2	27.991	0	64.72	13502000000	172	P51572;P51572-2	P51572;P51572-2	B-cell receptor-associated protein 31	BCAP31			-1.41059	3.46244	+	0	-2.25914	-0.131207	1.22427		0.462956	-0.238408	0.104546	0.510201		0.616511	0.177266	29.8309	29.7305	29.8217	28.4085	28.1643	28.5785	29.6118	29.6384	29.7393	29.6961	29.6181	29.6391	29.6485	29.9273	29.6911
3420	4	4	6	93.956	0.00025088	6.5808	162250000	5	Q8TEY7-3;Q8TEY7-2;Q8TEY7	Q8TEY7-3;Q8TEY7-2;Q8TEY7	Ubiquitin carboxyl-terminal hydrolase 33	USP33			-1.38034	0.658993		0.0561658	-0.952951	-1.71985	0.854461	+	0.0204541	-1.1982	NaN	NaN		NaN	NaN	25.6324	22.7897	22.8957	22.0964	22.3495	22.7308	21.9207	22.2402	21.9973	NaN	NaN	NaN	NaN	NaN	NaN
2669	4	4	11.7	46.8	0	11.608	951350000	34	Q4G148-2;Q4G148	Q4G148-2;Q4G148	Glucoside xylosyltransferase 1	GXYLT1			-1.36811	0.950478	+	0.0480417	-1.16574	-0.182565	0.261052		0.470006	-0.234443	NaN	NaN		NaN	NaN	26.5674	26.0753	26.0717	23.6195	25.1681	25.8225	25.6936	26.4677	26.0054	NaN	NaN	NaN	NaN	NaN	NaN
4303	3	3	11.1	38.298	0	15.025	514080000	20	Q9H6Y7	Q9H6Y7	E3 ubiquitin-protein ligase RNF167	RNF167			-1.35146	2.965	+	0.00885714	-2.04674	-1.36213	2.87337	+	0.0118621	-2.03072	NaN	NaN		NaN	NaN	25.4796	25.7987	25.447	24.4059	24.0125	24.2526	24.0894	24.4704	24.0792	NaN	NaN	NaN	NaN	NaN	NaN
119	10	9	61.5	21.671	0	101.17	21706000000	187	O00264;O00264-2	O00264;O00264-2	Membrane-associated progesterone receptor component 1	PGRMC1			-1.34052	3.99879	+	0	-2.28641	-0.237764	2.21937		0.170432	-0.436462	-0.0351041	0.0410227		0.901639	-0.0443672	30.7783	30.6923	30.6947	29.2939	29.3057	29.5442	30.4337	30.5505	30.4679	28.7185	27.9853	28.779	28.1869	28.5353	28.6553
1415	13	3	32.7	42.331	0	59.402	1170100000	32	P38159;P38159-2;P38159-3;O75526	P38159;P38159-2	RNA-binding motif protein, X chromosome;RNA-binding motif protein, X chromosome, N-terminally processed	RBMX			-1.33116	0.878364	+	0.0492437	-1.10404	-0.776168	0.51538		0.0589563	-0.668728	0.870541	1.19926	+	0.049506	1.0349	24.8409	23.4909	22.9084	21.9977	22.0078	23.2413	22.4377	23.5742	22.8998	28.0778	27.307	27.4023	28.0302	28.8576	28.511
2566	9	9	28.3	52.025	0	33.242	2762800000	61	Q15904	Q15904	V-type proton ATPase subunit S1	ATP6AP1			-1.32822	3.7759	+	0	-2.22329	-0.151651	1.07036		0.408055	-0.267653	NaN	NaN		NaN	NaN	27.7527	27.6712	27.6634	26.2369	26.3179	26.5478	27.428	27.5746	27.6297	NaN	NaN	NaN	NaN	NaN	NaN
525	8	8	34.6	35.612	0	41.865	1935700000	40	O75787-2;O75787	O75787-2;O75787	Renin receptor	ATP6AP2			-1.31942	3.64829	+	0.0112727	-2.18342	-0.0953719	1.34086		0.597402	-0.178844	NaN	NaN		NaN	NaN	27.2339	27.1733	27.1356	25.7328	25.7927	26.0591	27.1139	27.0876	27.0553	NaN	NaN	NaN	NaN	NaN	NaN
1945	5	5	38	13.995	0	13.063	9431900000	51	P62899-3;P62899;P62899-2	P62899-3;P62899;P62899-2	60S ribosomal protein L31	RPL31			-1.30609	0.949822	+	0.04612	-1.33427	NaN	NaN		NaN	NaN	0.114663	0.135875		0.688389	0.14132	28.1072	NaN	28.5336	NaN	26.5855	27.4431	NaN	NaN	26.3777	30.3343	31.0506	31.1238	31.3055	30.8526	30.6945
1617	10	10	44.5	28.994	0	118.01	5160800000	139	P50402	P50402	Emerin	EMD			-1.28233	4.10519	+	0	-2.22014	-0.138227	1.30941		0.438307	-0.251573	0.414269	1.90125		0.0815365	0.694926	28.5586	28.4867	28.4825	27.1356	27.1727	27.3725	28.301	28.4488	28.3633	27.6627	27.4981	27.5882	27.8512	28.1405	28.0001
4542	13	13	41.1	49.517	0	39.92	1946800000	70	Q9NVH6;Q9NVH6-8;Q9NVH6-7;Q9NVH6-5;Q9NVH6-4;Q9NVH6-6;Q9NVH6-2;Q9NVH6-3	Q9NVH6;Q9NVH6-8;Q9NVH6-7;Q9NVH6-5;Q9NVH6-4;Q9NVH6-6;Q9NVH6-2;Q9NVH6-3	Trimethyllysine dioxygenase, mitochondrial	TMLHE	Known	+	-1.25969	2.22276	+	0.0144615	-1.71018	0.436948	2.19201	+	0.0442862	0.748578	0.0185719	0.0379161		0.93456	0.0278783	26.4811	26.5682	26.3236	25.0097	25.647	24.9372	26.9663	26.9012	26.8164	27.3622	27.4759	27.0815	27.5453	27.2878	27.1423
5084	7	7	77.9	10.5	0	34.267	42210000000	225	Q9Y5L4	Q9Y5L4	Mitochondrial import inner membrane translocase subunit Tim13	TIMM13	Known	+	-1.18206	3.6347	+	0.00826667	-1.98939	0.187878	2.33		0.264959	0.352523	-1.74218	5.2177	+	0	-3.13726	31.4128	31.3982	31.3239	30.3674	30.062	30.1594	31.538	31.6001	31.5605	30.9944	30.8807	30.9027	29.1921	29.1055	29.2537
3827	6	6	25.4	48.05	0	71.224	1053300000	27	Q96RD7;Q96RD7-2	Q96RD7;Q96RD7-2	Pannexin-1	PANX1			-1.18099	0.966836	+	0.0497333	-1.10154	-1.54736	1.34676	+	0.00862921	-1.49181	1.56447	1.49033	+	0.0524255	1.58647	25.3775	23.7896	24.5017	23.2053	22.8878	24.0328	22.9665	23.5118	22.5485	26.2369	26.4937	27.7962	28.4698	28.2912	28.4593
498	3	2	8.4	54.91	0	15.88	152370000	10	O75487-2;O75487	O75487-2;O75487	Glypican-4;Secreted glypican-4	GPC4			-1.17763	3.07249	+	0.0188	-2.00918	NaN	NaN		NaN	NaN	NaN	NaN		NaN	NaN	24.1473	23.9313	24.1082	NaN	22.8748	22.8945	22.7787	NaN	NaN	NaN	NaN	NaN	NaN	NaN	NaN
3608	7	7	60	22.337	0	185.63	5960200000	133	Q96AB3;Q96AB3-2;Q96AB3-3	Q96AB3;Q96AB3-2;Q96AB3-3	Isochorismatase domain-containing protein 2, mitochondrial	ISOC2	Known	+	-1.17026	3.52823	+	0.00775	-1.9528	-0.166012	1.0377		0.372078	-0.288647	-1.39228	4.40762	+	0.0203636	-2.43979	28.6007	28.4891	28.5257	27.5352	27.3584	27.2111	28.2746	28.3407	28.5021	28.8205	28.8013	28.7282	27.5037	27.2792	27.3903
4584	3	3	9.3	41.631	0.00026015	7.6716	210940000	12	Q9NX61-2;Q9NX61	Q9NX61-2;Q9NX61	Transmembrane protein 161A	TMEM161A			-1.16338	1.24015	+	0.0358421	-1.31102	-0.812806	1.45231	+	0.0246215	-1.06956	NaN	NaN		NaN	NaN	24.7279	24.2078	24.1357	22.7867	NaN	23.6008	23.2032	23.8199	23.61	NaN	NaN	NaN	NaN	NaN	NaN
616	2	2	8.7	35.958	0.00025195	6.6869	126510000	13	O95258-2;O95258;O95258-3	O95258-2;O95258;O95258-3	Brain mitochondrial carrier protein 1	SLC25A14	Known	+	-1.16199	4.84712	+	0.0103333	-2.12933	NaN	NaN		NaN	NaN	NaN	NaN		NaN	NaN	23.4958	23.4488	23.5851	22.3095	22.3862	22.3481	NaN	NaN	NaN	NaN	NaN	NaN	NaN	NaN	NaN
181	33	33	40.9	133.77	0	315.97	27116000000	386	O14654	O14654	Insulin receptor substrate 4	IRS4			-1.11782	3.19642	+	0.0170909	-1.81634	-1.61851	4.27585	+	0.0154286	-2.74944	NaN	NaN		NaN	NaN	31.5349	31.4232	31.4074	30.1349	30.3722	30.5049	29.7681	29.9943	29.7475	NaN	NaN	NaN	NaN	NaN	NaN
4660	16	15	65.1	27.893	0	136.17	10009000000	255	Q9P0L0;Q9P0L0-2	Q9P0L0;Q9P0L0-2	Vesicle-associated membrane protein-associated protein A	VAPA			-1.08474	1.16143	+	0.0470612	-1.15497	-0.466033	0.532776		0.106969	-0.52631	0.385999	1.02583		0.132927	0.570442	29.69	28.8255	29.044	27.4753	28.1281	28.7018	28.5228	29.2823	28.3562	29.2724	29.449	29.5706	29.5663	30.0972	29.7866
193	11	11	34.1	45.083	0	74.697	3101500000	97	O14763-2;O14763;O14763-3	O14763-2;O14763	Tumor necrosis factor receptor superfamily member 10B	TNFRSF10B			-1.07197	1.95142	+	0.0267273	-1.44763	-2.07722	6.00759	+	0	-3.83381	NaN	NaN		NaN	NaN	28.3313	28.3745	28.4304	27.7528	27.2316	26.9359	26.2862	26.3602	26.2582	24.5538	NaN	NaN	24.2827	24.3909	NaN
2550	14	14	57.1	41.9	0	131.95	6687900000	145	Q15738	Q15738	Sterol-4-alpha-carboxylate 3-dehydrogenase, decarboxylating	NSDHL			-1.06605	3.54202	+	0.0163478	-1.80779	-0.244418	2.01211		0.166403	-0.442255	0.074742	0.466631		0.709964	0.131288	28.9337	28.8595	28.9672	27.6926	27.8957	27.974	28.5942	28.6992	28.7337	27.6965	27.6441	27.5735	27.6576	27.8315	27.6491
4595	6	6	23.8	42.924	0	17.276	946660000	37	Q9NXS2;Q9NXS2-3	Q9NXS2;Q9NXS2-3	Glutaminyl-peptide cyclotransferase-like protein	QPCTL			-1.06367	3.49336	+	0.0156667	-1.79642	-0.405631	2.31652		0.0525688	-0.709449	NaN	NaN		NaN	NaN	26.2375	26.3485	26.3912	25.1724	25.1924	25.4214	25.9691	25.9813	25.8099	NaN	NaN	NaN	NaN	NaN	NaN
978	7	7	17.6	44.96	0	31.751	21420000000	175	P13473;P13473-2;P13473-3	P13473;P13473-2;P13473-3	Lysosome-associated membrane glycoprotein 2	LAMP2			-1.06163	4.44808	+	0.0145882	-1.92107	-0.275997	1.7222		0.130984	-0.482123	-0.260933	0.49458		0.332919	-0.35738	30.7774	30.671	30.7325	29.7187	29.581	29.6963	30.3344	30.5613	30.4573	27.9119	27.3747	27.8856	27.1907	27.4923	27.7064
5079	6	6	80.7	9.3435	0	31.922	8313900000	94	Q9Y5J9	Q9Y5J9	Mitochondrial import inner membrane translocase subunit Tim8 B	TIMM8B	Known	+	-1.0518	1.2913	+	0.0394157	-1.19274	-0.301726	0.633908		0.183687	-0.422272	-0.900992	3.45814	+	0.0464906	-1.55435	29.0949	28.7088	28.6222	27.1632	27.7223	28.385	28.2221	28.7673	28.5313	29.5121	29.6296	29.5636	28.5925	28.8115	28.5984
1296	2	2	18.3	18.828	0	12.657	726540000	25	P30536	P30536	Translocator protein	TSPO	Known	+	-1.05147	3.09124	+	0.0139259	-1.708	0.820461	2.99867	+	0.0103486	1.37808	NaN	NaN		NaN	NaN	25.5228	25.412	25.3027	24.3717	24.1886	24.5227	26.1629	26.3752	26.1607	NaN	NaN	NaN	NaN	NaN	NaN
1224	8	8	67.6	15.649	0	30.966	4361900000	69	P26885	P26885	Peptidyl-prolyl cis-trans isomerase FKBP2	FKBP2			-1.03383	2.44487	+	0.0170588	-1.5461	-0.213165	0.408788		0.360646	-0.295495	0.296014	0.791068		0.239425	0.440001	28.0557	27.9247	27.9541	27.1906	26.6337	27.0088	27.3597	27.8294	28.1059	28.2251	28.1556	28.2196	28.2391	28.8209	28.4284
3218	5	5	23	28.272	0	20.544	493290000	18	Q8N2A8	Q8N2A8	Mitochondrial cardiolipin hydrolase	PLD6	Known		-1.0336	1.97281	+	0.0291064	-1.51786	-0.279503	0.716216		0.192945	-0.412013	NaN	NaN		NaN	NaN	25.5327	25.0682	25.2805	24.1904	24.33	NaN	25.1317	24.7794	25.1318	NaN	NaN	NaN	NaN	NaN	NaN
2210	39	39	47.5	113.32	0	323.31	9733400000	284	Q12860;Q12860-2;Q12860-3	Q12860;Q12860-2	Contactin-1	CNTN1			-1.03269	0.878047		0.0517882	-0.985702	NaN	NaN		NaN	NaN	-0.928902	3.25338	+	0.0502857	-1.56719	24.2032	25.4399	24.3607	23.1731	24.4016	23.3311	NaN	NaN	NaN	31.5482	31.6019	31.6232	30.6426	30.8269	30.5171
4071	3	3	16.9	20.675	0	9.077	1423900000	13	Q9BWH2	Q9BWH2	FUN14 domain-containing protein 2	FUNDC2	Predicted	+	-0.982006	1.35445	+	0.0474105	-1.17062	-0.646963	1.22273	+	0.0289912	-0.86426	NaN	NaN		NaN	NaN	26.5047	25.8868	25.888	24.7368	24.9632	25.6336	25.2625	25.7199	25.3563	NaN	27.8296	NaN	27.9307	28.254	28.0587
266	4	4	26	22.98	0	11.182	786780000	26	O15347	O15347	High mobility group protein B3	HMGB3			-0.971879	2.11766	+	0.0263077	-1.49254	0.104102	0.338665		0.633068	0.167181	NaN	NaN		NaN	NaN	25.1836	25.21	24.9126	24.2487	24.0118	NaN	25.2069	25.2055	NaN	NaN	NaN	NaN	NaN	NaN	NaN
771	25	13	70.1	32.852	0	221.83	77183000000	492	P05141;Q9H0C2	P05141	ADP/ATP translocase 2;ADP/ATP translocase 2, N-terminally processed	SLC25A5	Known	+	-0.952795	4.06287	+	0.0134286	-1.70419	-2.36894	5.88605	+	0	-4.29818	-0.124503	0.593454		0.559609	-0.209679	32.4677	32.4782	32.3444	31.4376	31.5585	31.4359	30.0961	30.0063	30.0812	32.4991	32.2622	32.4258	32.1484	32.314	32.3513
1257	10	10	21.6	63.544	0	45.314	1039500000	43	P28799;P28799-3;P28799-2	P28799;P28799-3;P28799-2	Granulins;Acrogranin;Paragranulin;Granulin-1;Granulin-2;Granulin-3;Granulin-4;Granulin-5;Granulin-6;Granulin-7	GRN			-0.945161	0.779824		0.0593277	-0.89266	-0.938975	0.602422	+	0.0364812	-0.78374	NaN	NaN		NaN	NaN	26.7795	25.258	25.3106	25.0255	24.3381	25.1491	24.128	25.7777	24.6255	NaN	NaN	NaN	NaN	NaN	NaN
3664	9	7	34.1	35.196	0	57.538	829830000	67	Q96DH6;Q96DH6-2;Q96DH6-3	Q96DH6;Q96DH6-2;Q96DH6-3	RNA-binding protein Musashi homolog 2	MSI2			-0.922821	0.555174		0.0792	-0.746274	-0.674735	0.762335	+	0.045407	-0.743765	0.358695	0.336351		0.304904	0.381487	24.7009	24.1568	24.2072	22.2247	23.3697	24.702	23.1273	24.3783	23.5351	27.3546	27.1562	26.6427	26.763	27.369	28.0976
4095	5	5	17.3	36.223	0	12.343	763320000	17	Q9BXS4	Q9BXS4	Transmembrane protein 59	TMEM59			-0.920448	2.0279	+	0.0331613	-1.32199	NaN	NaN		NaN	NaN	NaN	NaN		NaN	NaN	26.1275	26.7611	26.2897	25.5266	25.5159	25.3745	NaN	24.5767	NaN	NaN	NaN	NaN	NaN	NaN	NaN
12	3	3	6.6	67.038	0	14.553	154820000	13	A2RU67	A2RU67	Uncharacterized protein KIAA1467	KIAA1467			-0.906345	0.798799		0.060878	-0.993609	-1.2163	1.3498	+	0.00993651	-1.5876	NaN	NaN		NaN	NaN	24.461	23.9426	NaN	22.975	23.6159	NaN	22.9254	23.0456	NaN	NaN	NaN	NaN	NaN	NaN	NaN
674	33	33	64.9	66.9	0	323.31	72251000000	717	O95831;O95831-3;O95831-2;O95831-5;O95831-4;O95831-6	O95831;O95831-3;O95831-2;O95831-5	Apoptosis-inducing factor 1, mitochondrial	AIFM1	Known	+	-0.901968	5.11021	+	0.0129655	-1.70031	0.369158	4.23493		0.0524068	0.70895	-0.0205345	0.137544		0.915043	-0.0369889	31.9359	31.9894	31.9339	31.0843	31.0657	31.0034	32.3375	32.3036	32.3256	31.8235	31.7605	31.8179	31.6935	31.7756	31.8712
2339	5	5	18.1	46.031	0	47.526	2242600000	76	Q13641	Q13641	Trophoblast glycoprotein	TPBG			-0.900359	1.31449	+	0.048768	-1.09696	-1.49501	2.18649	+	0.012	-1.89864	0.111162	0.37377		0.619728	0.179268	27.8144	27.613	27.6656	26.1843	26.9774	27.2302	25.6579	26.5949	26.3552	25.0047	24.9783	25.1695	NaN	25.0386	25.2854
418	4	4	26.5	21.183	0	19.783	1835400000	31	O60637-3;O60637-2;O60637	O60637-3;O60637-2;O60637	Tetraspanin-3	TSPAN3			-0.891047	3.67924	+	0.0175758	-1.56554	-0.930049	3.57485	+	0.00805714	-1.61255	NaN	NaN		NaN	NaN	27.4698	27.2801	27.2777	26.4618	26.4004	26.4924	26.4032	26.3433	26.491	NaN	NaN	NaN	NaN	NaN	NaN
3129	5	5	10.6	70.86	0	10.09	305200000	21	Q8IUH4;Q8IUH4-2;Q8IUH4-3	Q8IUH4;Q8IUH4-2;Q8IUH4-3	Palmitoyltransferase ZDHHC13	ZDHHC13			-0.889204	1.78337	+	0.0347317	-1.22871	-0.264568	0.325523		0.322893	-0.317239	0.396274	0.586451		0.189003	0.504539	23.9256	24.11	23.4254	23.0789	22.7665	22.948	23.1628	24.0577	23.4467	24.6877	24.8407	25.317	25.1475	NaN	25.542
2618	16	16	42.7	56.805	0	64.956	2869700000	130	Q16850;Q16850-2	Q16850;Q16850-2	Lanosterol 14-alpha demethylase	CYP51A1			-0.886108	2.66189	+	0.02736	-1.41467	-0.629324	2.79566	+	0.0251405	-1.08001	0.27327	0.909498		0.255429	0.42682	27.5595	27.4633	27.3436	26.4373	26.7874	26.4833	26.7362	26.9235	26.8186	27.5233	27.3702	27.6705	27.6068	27.9885	27.7887
1478	4	4	12.9	55.148	0	25.802	1860900000	35	P43003-2;P43003;P48664-2;P48664	P43003-2;P43003	Excitatory amino acid transporter 1	SLC1A3			-0.879248	2.77016	+	0.0285	-1.42421	-1.66441	5.00354	+	0	-2.97317	NaN	NaN		NaN	NaN	27.6311	27.5483	27.4777	26.7281	26.4636	26.8277	25.8549	25.9679	25.8411	NaN	NaN	NaN	NaN	NaN	NaN
2488	3	3	16.5	26.352	0	23.434	5337000000	56	Q15125	Q15125	3-beta-hydroxysteroid-Delta(8),Delta(7)-isomerase	EBP			-0.878444	2.24282	+	0.0337049	-1.32521	-0.239862	0.604538		0.263452	-0.353895	-0.845936	1.82429	+	0.0464804	-1.26723	28.2311	27.9087	27.8608	26.9481	27.0804	27.3367	27.5294	27.9952	27.7563	28.9748	29.011	29.3787	28.2997	28.2515	NaN
162	5	5	16.4	41.522	0	19.427	1787200000	29	O00767	O00767	Acyl-CoA desaturase	SCD			-0.877935	1.94772	+	0.0378333	-1.25877	-1.47878	3.68005	+	0.0156364	-2.4056	NaN	NaN		NaN	NaN	27.1783	27.0219	27.3077	26.1094	26.1146	26.65	25.7454	25.5337	25.7924	NaN	NaN	NaN	NaN	NaN	NaN
2140	15	15	58.2	28.723	0	99.39	2523100000	73	Q06323;Q06323-3;Q06323-2	Q06323;Q06323-3;Q06323-2	Proteasome activator complex subunit 1	PSME1			-0.875512	0.277286		0.186355	-0.505937	-1.90147	0.941887	+	0.0124885	-1.39693	0.53776	1.42292		0.0635398	0.795617	26.268	26.2878	NaN	26.1602	23.5087	26.5383	23.6928	25.7104	23.7262	28.8394	28.6917	28.7738	29.0155	29.6064	29.2963
4408	10	5	61.2	22.977	0	38.155	1412500000	30	Q9NP72;Q9NP72-2	Q9NP72;Q9NP72-2	Ras-related protein Rab-18	RAB18			-0.871353	1.87844	+	0.03405	-1.23534	-0.0638955	0.147946		0.790305	-0.0967021	0.457573	2.40327		0.0634051	0.793532	26.2844	26.0555	26.3986	25.5316	25.5748	25.0179	25.934	26.2789	26.3339	26.4993	26.5128	26.5209	26.9076	27.1203	26.8778
4197	4	4	28.8	23.23	0	27.603	722560000	28	Q9H0R3;Q9H0R3-2	Q9H0R3	Transmembrane protein 222	TMEM222			-0.852392	3.82426	+	0.0202286	-1.52004	-0.65335	2.84347	+	0.0265352	-1.11989	NaN	NaN		NaN	NaN	25.7794	25.7088	25.6417	24.8335	24.9464	24.7927	25.2032	24.9832	24.9833	NaN	NaN	NaN	NaN	NaN	NaN
1561	13	13	40.6	57.548	0	226.12	14014000000	215	P49257	P49257	Protein ERGIC-53	LMAN1	Predicted		-0.835649	1.97275	+	0.0375529	-1.22024	-0.25912	0.407711		0.287543	-0.336644	0.40436	0.343404		0.273614	0.409458	30.2118	29.718	29.9465	28.896	29.2887	29.1846	29.249	29.9945	29.8554	27.0595	26.8902	27.1093	26.6455	28.3086	27.3181
3680	7	7	42.3	26.17	0	45.739	1750000000	70	Q96EH3	Q96EH3	Mitochondrial assembly of ribosomal large subunit protein 1	MALSU1	Known	+	-0.833008	0.937357		0.0603587	-0.909834	-0.925384	1.26733	+	0.0265133	-1.09825	-0.170542	0.519471		0.468417	-0.264745	26.132	25.4999	25.4533	24.4534	24.5673	25.5655	24.4389	25.2906	24.5796	28.1954	28.1885	28.0986	28.27	27.878	27.8228
931	8	8	14	54.083	0	77.704	6189500000	200	P11166	P11166	Solute carrier family 2, facilitated glucose transporter member 1	SLC2A1			-0.83177	3.5933	+	0.0269744	-1.46463	-0.261156	2.10614		0.139365	-0.472344	0.188558	0.791101		0.400956	0.309091	28.354	28.2593	28.3177	27.3945	27.4415	27.5997	28.103	28.0851	27.9595	28.9714	29.0118	29.3071	29.3107	29.3202	29.2251
760	11	11	41.9	35.716	0	92.187	2563600000	78	P04818;P04818-2;P04818-3	P04818;P04818-2	Thymidylate synthase	TYMS	Known		-0.82774	2.82206	+	0.0362963	-1.36355	-0.387952	2.10436		0.0591238	-0.670423	0.546385	0.963413		0.0767708	0.71368	27.3011	27.0812	27.2603	26.2232	26.4413	26.4949	26.7945	26.9064	26.7778	27.8898	27.2669	27.7655	27.8653	28.5069	28.1891
2660	3	3	34.7	11.354	0	10.184	1285800000	22	Q3ZAQ7;Q3ZAQ7-2	Q3ZAQ7;Q3ZAQ7-2	Vacuolar ATPase assembly integral membrane protein VMA21	VMA21			-0.815498	1.6117	+	0.049211	-1.1757	-0.212615	0.613196		0.308487	-0.324288	NaN	NaN		NaN	NaN	26.9526	26.5888	26.4519	25.8258	25.8721	NaN	26.3959	26.5379	26.4217	NaN	NaN	NaN	NaN	NaN	NaN
3705	13	13	60.5	31.284	0	157.33	2427100000	107	Q96FW1;Q96FW1-2	Q96FW1;Q96FW1-2	Ubiquitin thioesterase OTUB1	OTUB1			-0.811197	0.694667		0.0743059	-0.786046	-1.3381	1.16618	+	0.0141081	-1.2872	0.518818	2.26312		0.0526211	0.872031	24.6507	26.1483	26.2036	24.623	25.152	24.794	24.051	24.666	24.2712	28.7099	28.6084	28.8615	29.1399	29.2483	29.348
513	7	7	54.2	22.875	0	92.129	5086200000	110	O75608-2;O75608	O75608-2;O75608	Acyl-protein thioesterase 1	LYPLA1	Predicted	+	-0.80859	3.91441	+	0.0294	-1.45775	-0.150794	1.28976		0.401834	-0.271794	-0.315736	0.982718		0.194007	-0.485301	28.0157	28.0372	28.1596	27.3161	27.2629	27.2077	27.9325	27.9673	27.8603	28.5744	28.6458	28.6678	28.0257	28.5168	28.3981
1339	3	3	15.5	40.037	0.00026089	7.724	756290000	22	P33908-2;P33908	P33908-2;P33908	Mannosyl-oligosaccharide 1,2-alpha-mannosidase IA	MAN1A1			-0.804883	2.1691	+	0.035381	-1.22605	-0.483366	1.65567	+	0.0420036	-0.763563	NaN	NaN		NaN	NaN	25.9052	25.9852	25.7807	24.8164	25.1279	25.3123	25.1725	25.5591	25.4895	NaN	NaN	NaN	NaN	NaN	NaN
2849	7	7	24.6	35.119	0	27.923	1599800000	30	Q6IAN0	Q6IAN0	Dehydrogenase/reductase SDR family member 7B	DHRS7B	Predicted	+	-0.79747	3.62306	+	0.0268235	-1.41402	0.0244961	0.157899		0.907887	0.0438885	NaN	NaN		NaN	NaN	26.8156	26.8674	26.7589	26.1233	25.991	25.9352	26.935	26.776	26.8043	NaN	NaN	NaN	NaN	NaN	NaN
2478	19	19	51.4	74.667	0	141.1	3415500000	125	Q15067-2;Q15067;Q15067-3	Q15067-2;Q15067;Q15067-3	Peroxisomal acyl-coenzyme A oxidase 1	ACOX1		+	-0.795231	2.44248	+	0.0370704	-1.2624	-0.154452	0.676773		0.430274	-0.255858	0.485336	1.48093		0.0701037	0.744517	27.5504	27.3015	27.4075	26.8062	26.4322	26.6353	27.1216	27.371	27.3034	28.0335	27.9211	28.2066	28.3803	28.7905	28.4464
4683	13	7	35.3	46.528	0	25.726	1211200000	33	Q9P289;Q9P289-2;Q9P289-3	Q9P289;Q9P289-2;Q9P289-3	Serine/threonine-protein kinase 26	STK26			-0.792	1.75839	+	0.0501308	-1.12703	-0.375493	1.78048		0.0679948	-0.631453	NaN	NaN		NaN	NaN	26.5402	26.3525	26.4478	25.275	25.7655	25.9241	25.9394	26.2082	26.0665	NaN	NaN	NaN	NaN	NaN	NaN
3959	14	14	50.3	41.806	0	153.25	6015100000	137	Q9BRK5;Q9BRK5-6;Q9BRK5-2;Q9BRK5-4;Q9BRK5-3;Q9BRK5-5	Q9BRK5;Q9BRK5-6;Q9BRK5-2	45 kDa calcium-binding protein	SDF4			-0.790033	2.86984	+	0.0365714	-1.31836	-0.643779	2.57052	+	0.0254321	-1.07812	-0.546562	0.582222		0.121028	-0.594998	28.7472	28.8458	29.0561	28.1302	28.0143	28.1345	28.1719	28.2751	28.2708	27.0263	26.348	27.349	25.9977	26.136	26.9499
5025	10	10	78	19.536	0	135.44	3180300000	106	Q9Y3D2	Q9Y3D2	Methionine-R-sulfoxide reductase B2, mitochondrial	MSRB2	Known	+	-0.785896	1.65618	+	0.0491613	-1.09727	-0.0835387	0.40258		0.679287	-0.142096	0.310086	1.49437		0.16593	0.520226	26.9003	26.8449	27.0704	26.5551	25.8809	26.022	26.7776	26.8239	26.9636	28.6906	28.7169	28.4558	28.9694	28.8352	28.989
326	3	3	11.3	42.813	0	10.041	651520000	13	O43567;O43567-2	O43567	E3 ubiquitin-protein ligase RNF13	RNF13			-0.784892	3.19336	+	0.0367143	-1.35048	-0.743873	2.32759	+	0.0213333	-1.24455	NaN	NaN		NaN	NaN	25.7599	25.9432	25.9255	25.1957	25.0765	25.0019	25.0489	NaN	25.2158	NaN	NaN	NaN	NaN	NaN	NaN
2574	27	23	59.1	55.39	0	312.09	4126800000	141	Q16352	Q16352	Alpha-internexin	INA			-0.784628	0.389379		0.134794	-0.595545	-0.843838	0.421278		0.0716475	-0.639351	0.770676	1.88831	+	0.044487	1.13266	22.3754	24.2647	22.3615	NaN	22.2812	22.1507	22.2623	22.0511	NaN	29.5286	29.6411	29.8646	30.2477	30.7444	30.3542
3220	4	4	10.3	51.459	0.00023272	4.8981	637790000	12	Q8N2G8-2;Q8N2G8-3;Q8N2G8	Q8N2G8-2;Q8N2G8-3;Q8N2G8	GH3 domain-containing protein	GHDC			-0.778344	3.35367	+	0.0360702	-1.42614	NaN	NaN		NaN	NaN	NaN	NaN		NaN	NaN	26.0068	25.955	26.0751	25.222	25.2459	NaN	25.9499	NaN	NaN	NaN	NaN	NaN	NaN	NaN	NaN
1410	17	17	53.2	48.115	0	103.08	11913000000	166	P37268;P37268-2;P37268-3;P37268-4;P37268-5	P37268;P37268-2;P37268-3;P37268-4;P37268-5	Squalene synthase	FDFT1			-0.776429	2.83009	+	0.0362388	-1.29422	-0.789069	4.05332	+	0.0115102	-1.43674	0.334261	0.862683		0.189265	0.491421	29.9451	29.7927	29.8902	28.9368	29.1168	29.2451	29.0526	29.1246	29.0836	28.0521	27.691	27.8715	27.9847	28.4841	28.1485
3245	2	2	26.7	14.686	0	40.554	780570000	21	Q8N4V1;Q8N4V1-2	Q8N4V1;Q8N4V1-2	Membrane magnesium transporter 1	MMGT1			-0.776417	2.29029	+	0.0377931	-1.2138	0.0613244	0.172517		0.790036	0.096644	NaN	NaN		NaN	NaN	25.7987	25.6081	25.4115	24.8508	24.6753	24.9629	25.5517	25.8075	25.6431	NaN	NaN	NaN	NaN	NaN	NaN
3370	4	4	8	84.046	0	11.122	469570000	14	Q8TAD4;Q8TAD4-2	Q8TAD4;Q8TAD4-2	Zinc transporter 5	SLC30A5			-0.774766	1.96111	+	0.0465859	-1.15173	-0.565037	1.65137	+	0.0293154	-0.897413	NaN	NaN		NaN	NaN	25.3002	24.9989	25.2035	24.2903	24.2033	24.6847	24.5214	24.6836	NaN	NaN	NaN	NaN	NaN	NaN	NaN
5120	3	3	31.4	11.805	0	20.068	1868900000	52	Q9Y6A9	Q9Y6A9	Signal peptidase complex subunit 1	SPCS1			-0.767997	1.81799	+	0.0495357	-1.11525	-0.345147	0.55019		0.165206	-0.443835	NaN	NaN		NaN	NaN	27.2352	27.169	26.7271	26.4146	26.0799	26.3328	26.3204	27.1061	26.6694	25.8807	NaN	NaN	26.1252	26.3665	NaN
3770	11	11	25.6	51.871	0	35.675	2097700000	59	Q96JJ7;Q96JJ7-2	Q96JJ7	Protein disulfide-isomerase TMX3	TMX3			-0.766676	2.5255	+	0.034481	-1.23867	-0.452592	2.14215	+	0.0412374	-0.767699	0.892759	0.738403		0.0558571	0.846669	27.0839	27.1755	27.0403	26.1745	26.2755	26.5497	26.5432	26.805	26.5937	25.5611	26.3871	25.7258	25.8795	26.8939	27.5789
153	6	6	27.7	29.48	0	148.18	2820900000	81	O00584;O00584-2	O00584;O00584-2	Ribonuclease T2	RNASET2			-0.765618	5.0053	+	0.028	-1.45145	-0.317327	2.6178		0.0839534	-0.580654	NaN	NaN		NaN	NaN	27.8438	27.7515	27.809	27.0412	27.0248	27.0415	27.4086	27.5157	27.528	NaN	NaN	NaN	NaN	NaN	NaN
3347	15	15	62.1	51.263	0	92.192	2603100000	121	Q8NFQ8	Q8NFQ8	Torsin-1A-interacting protein 2	TOR1AIP2			-0.75998	3.4644	+	0.0348475	-1.34049	-0.111472	0.712567		0.558669	-0.195062	0.265311	0.279484		0.41198	0.300855	27.2336	27.0902	27.1356	26.33	26.3535	26.496	26.9297	27.1212	27.074	27.481	26.6985	27.6235	27.0384	27.8573	27.7032
2510	7	7	34.3	22.761	0	64.161	3972200000	110	Q15363	Q15363	Transmembrane emp24 domain-containing protein 2	TMED2			-0.75876	1.36536	+	0.0495556	-0.99891	-0.613967	1.27373	+	0.0305923	-0.845553	0.150106	0.370705		0.53173	0.224204	27.8248	27.8575	27.6677	26.7047	26.8451	27.5238	26.7651	27.5148	27.2281	28.2468	28.0877	28.4317	28.1313	28.5302	28.5551
788	16	16	45.7	48.766	0	170.99	19720000000	247	P06280	P06280	Alpha-galactosidase A	GLA			-0.758529	5.04299	+	0.0282667	-1.44031	-0.572795	3.66011	+	0.0246364	-1.05107	1.5206	0.454643		0.0642482	0.783132	30.6156	30.5754	30.6435	29.8702	29.8172	29.8715	29.9599	30.0629	30.0934	25.2764	26.1229	24.4602	25.1757	29.5065	25.7391
1518	89	87	52.7	270.63	0	323.31	18641000000	670	P46821	P46821	Microtubule-associated protein 1B;MAP1B heavy chain;MAP1 light chain LC1	MAP1B			-0.756475	0.763524		0.0747069	-0.791395	-0.202782	0.247214		0.4491	-0.245933	0.790565	2.35305	+	0.0466582	1.24176	24.7333	25.4164	25.5328	24.5202	23.7868	25.1061	24.7338	25.427	24.9134	31.7965	31.813	31.8791	32.3595	32.8067	32.694
2325	6	5	12.7	77.422	0	18.495	462610000	41	Q13586;Q13586-2	Q13586;Q13586-2	Stromal interaction molecule 1	STIM1			-0.752789	1.43512	+	0.0484615	-1.01189	-0.196808	1.64726		0.262251	-0.354931	NaN	NaN		NaN	NaN	25.1447	25.1769	25.0719	24.113	24.1607	24.8615	24.8484	24.999	24.9557	NaN	NaN	NaN	NaN	NaN	NaN
2944	3	3	4.2	83.196	0.00023321	4.928	110750000	14	Q6ZPD9;Q6ZPD9-2	Q6ZPD9;Q6ZPD9-2	Probable C-mannosyltransferase DPY19L3	DPY19L3			-0.75246	2.00604	+	0.0469126	-1.19782	-0.560209	1.82203	+	0.0291294	-0.879152	NaN	NaN		NaN	NaN	23.2174	23.1352	23.3839	22.3767	NaN	22.6094	22.6642	22.8961	22.4956	NaN	NaN	NaN	NaN	NaN	NaN
728	31	31	47.8	84.87	0	204.52	20761000000	375	P02786	P02786	Transferrin receptor protein 1;Transferrin receptor protein 1, serum form	TFRC	Predicted		-0.75194	2.75842	+	0.0373151	-1.25097	-1.06806	4.53772	+	0.0126486	-1.941	0.351381	1.46297		0.131143	0.574652	30.5703	30.5252	30.5709	29.6851	29.7233	30.0022	29.5161	29.5523	29.3939	30.2128	30.0589	30.1344	30.3093	30.6635	30.4874
3365	4	4	23.4	32.645	0	22.874	634750000	7	Q8NI37	Q8NI37	Protein phosphatase PTC7 homolog	PPTC7	Known	+	-0.748122	1.04497		0.0604483	-1.00924	-0.584967	1.23851	+	0.0340365	-0.841568	NaN	NaN		NaN	NaN	25.5276	26.0095	NaN	25.0082	25.0327	NaN	25.07	25.2682	25.2125	NaN	NaN	NaN	NaN	NaN	NaN
3484	3	3	17.1	27.835	0	32.636	978270000	14	Q8WY22;REV__Q96PE2	Q8WY22	BRI3-binding protein	BRI3BP	Predicted		-0.743446	0.554987		0.092389	-0.699145	-0.172771	0.164716		0.568804	-0.195128	NaN	NaN		NaN	NaN	26.7128	25.9258	26.0258	NaN	24.8553	26.1007	NaN	26.3383	25.7591	NaN	NaN	NaN	NaN	NaN	NaN
2074	5	5	45.9	15.164	0	22.143	1353400000	27	Q01469;A8MUU1	Q01469	Fatty acid-binding protein, epidermal	FABP5			-0.739811	1.76458	+	0.0480606	-1.07444	-0.649464	2.35479	+	0.0247907	-1.06097	NaN	NaN		NaN	NaN	26.9184	26.7167	26.8632	25.7388	26.2282	26.3118	26.0538	26.3676	26.1285	NaN	NaN	NaN	NaN	NaN	NaN
4654	7	7	37.5	29.952	0	27.977	2413900000	56	Q9P0I2;Q9P0I2-2	Q9P0I2;Q9P0I2-2	ER membrane protein complex subunit 3	EMC3			-0.738794	1.87825	+	0.048381	-1.09591	0.239347	1.36151		0.193985	0.411154	0.599087	1.24185		0.0598228	0.824592	27.3405	27.2299	27.0964	26.172	26.5822	26.6963	27.3929	27.5378	27.4543	25.4313	25.1084	25.4837	25.9533	26.269	25.5982
3446	10	10	48.9	26.55	0	24.147	1177000000	43	Q8WVC6;Q8WVC6-2	Q8WVC6	Dephospho-CoA kinase domain-containing protein	DCAKD	Predicted	+	-0.734065	1.05736		0.0607901	-0.888457	-0.539307	0.313309		0.161935	-0.448113	0.17576	0.223234		0.543044	0.217684	25.2719	25.9191	26.2382	25.1682	24.7641	25.2948	24.9488	26.5105	24.352	27.2442	26.5164	26.4319	26.6809	26.8055	27.2336
4597	3	3	13.9	41.818	0.00025025	6.522	334370000	10	Q9NXW2;Q9NXW2-2	Q9NXW2;Q9NXW2-2	DnaJ homolog subfamily B member 12	DNAJB12			-0.726493	2.0444	+	0.0510442	-1.11216	-0.584983	2.29204	+	0.0247294	-0.966744	NaN	NaN		NaN	NaN	24.7061	24.874	24.729	24.1359	23.7609	24.2329	24.0114	24.3196	24.2232	NaN	NaN	NaN	NaN	NaN	NaN
2522	13	13	41.3	54.75	0	117.45	3285100000	110	Q15392-2;Q15392	Q15392-2;Q15392	Delta(24)-sterol reductase	DHCR24		+	-0.725893	3.996	+	0.0342667	-1.32751	-0.489944	2.73924	+	0.0291849	-0.864647	0.195936	0.746074		0.389879	0.31574	27.9304	27.8355	27.8204	27.1609	27.0732	27.1745	27.2653	27.391	27.4603	27.1726	27.1925	27.1557	27.2524	27.6097	27.2465
2724	36	36	27.2	213.7	0	171.89	8846200000	244	Q5JRA6;Q5JRA6-2;Q5JRA6-4;Q5JRA6-3	Q5JRA6;Q5JRA6-2	Melanoma inhibitory activity protein 3	MIA3			-0.724925	2.15488	+	0.0499048	-1.12874	0.090306	0.354306		0.666072	0.149018	-0.0133425	0.0170018		0.953712	-0.0175442	29.3623	29.1056	29.089	28.3818	28.3197	28.6805	29.1603	29.3483	29.3191	27.0448	27.1003	27.3807	27.6328	26.8568	26.9961
567	13	13	12.2	168.89	0	43.896	1648400000	34	O94813-3;O94813-2;O94813	O94813-3;O94813-2;O94813	Slit homolog 2 protein;Slit homolog 2 protein N-product;Slit homolog 2 protein C-product	SLIT2			-0.721275	3.0942	+	0.03632	-1.24537	-1.05311	3.19483	+	0.00917647	-1.72968	NaN	NaN		NaN	NaN	27.1549	27.2813	27.1772	26.4767	26.3672	26.6057	25.9505	26.2245	26.2791	NaN	NaN	NaN	NaN	NaN	NaN
2118	18	17	11.2	265.4	0	42.29	1174200000	41	Q04721;Q7Z3S9-2;Q7Z3S9;Q7Z3S9-3	Q04721	Neurogenic locus notch homolog protein 2;Notch 2 extracellular truncation;Notch 2 intracellular domain	NOTCH2			-0.717669	1.86626	+	0.048391	-1.07028	-0.895108	2.49507	+	0.0107429	-1.39527	NaN	NaN		NaN	NaN	26.5211	26.6971	26.5913	25.6269	25.8438	26.1859	25.5129	25.9595	25.6518	NaN	NaN	NaN	NaN	NaN	NaN
3086	3	3	9.7	51.396	0	10.407	1112200000	22	Q86VR2	Q86VR2	Protein FAM134C	FAM134C			-0.715463	2.91669	+	0.0382326	-1.21807	-0.233344	1.49223		0.198523	-0.407657	NaN	NaN		NaN	NaN	26.4245	26.2641	26.2791	25.4654	25.6789	25.677	26.0068	26.1832	26.0777	NaN	NaN	NaN	NaN	NaN	NaN
3726	20	20	54	66.59	0	76.094	3858600000	155	Q96GW9	Q96GW9	Methionine--tRNA ligase, mitochondrial	MARS2	Known	+	-0.714302	2.0509	+	0.0499672	-1.09891	0.234215	0.866527		0.234449	0.3743	0.281307	0.881281		0.246984	0.433662	27.9617	27.5839	27.6133	27.0834	27.1033	26.8292	27.956	28.01	27.8955	27.4901	27.1198	27.1871	27.3729	27.7023	27.5658
4418	5	5	18.8	28.991	0	13.625	1056200000	33	Q9NPF0;Q9NPF0-2	Q9NPF0;Q9NPF0-2	CD320 antigen	CD320			-0.711962	2.10597	+	0.0500855	-1.10516	-0.760942	3.04131	+	0.0131631	-1.29807	NaN	NaN		NaN	NaN	26.5187	26.4127	26.2797	25.4861	25.6666	25.9224	25.7207	25.5455	25.662	NaN	NaN	NaN	NaN	NaN	NaN
3742	2	2	10.6	29.665	0	8.5016	391500000	25	Q96HV5	Q96HV5	Transmembrane protein 41A	TMEM41A			-0.709337	2.89721	+	0.0384545	-1.20707	-0.285515	1.46647		0.129699	-0.483651	NaN	NaN		NaN	NaN	24.7776	24.9814	25.0396	24.1933	24.1799	24.2973	24.5633	24.7056	24.6731	NaN	NaN	NaN	NaN	NaN	NaN
2719	3	3	23.7	26.422	0	18.437	561480000	12	Q5HYI8	Q5HYI8	Rab-like protein 3	RABL3			-0.706399	1.05877		0.0628506	-0.903289	-0.582504	1.18726	+	0.035593	-0.797243	NaN	NaN		NaN	NaN	25.8424	25.7708	25.1547	24.8675	24.8982	NaN	24.8597	25.0596	25.101	NaN	NaN	NaN	NaN	NaN	NaN
3499	11	11	53.3	24.68	0	73.046	8568100000	103	Q92520	Q92520	Protein FAM3C	FAM3C			-0.705626	1.96946	+	0.0484275	-1.07498	-0.247143	0.747635		0.227844	-0.37918	0.879307	0.902905		0.0500038	0.921362	29.4679	29.1272	29.111	28.3417	28.5448	28.7028	28.8197	29.1573	28.9877	27.1751	25.826	26.2062	27.7065	27.0562	27.0825
811	12	12	65.5	22.088	0	68.038	7360000000	156	P07203;P07203-2	P07203	Glutathione peroxidase 1	GPX1	Known	+	-0.705582	3.96935	+	0.0357059	-1.29177	0.353898	2.93043		0.0620705	0.651913	-0.271842	0.548882		0.309349	-0.378015	28.5587	28.578	28.6779	27.8584	27.9523	27.8873	28.9156	28.9758	28.985	28.4369	28.624	28.5128	27.8378	28.5381	28.3823
2189	6	6	16.1	51.55	0	15.219	1257400000	38	Q10469	Q10469	Alpha-1,6-mannosyl-glycoprotein 2-beta-N-acetylglucosaminyltransferase	MGAT2			-0.704321	0.973923		0.0674266	-0.839637	0.0194187	0.0316017		0.93842	0.0274609	NaN	NaN		NaN	NaN	26.6721	26.4672	26.3026	25.2563	25.7085	26.364	26.2165	26.8266	26.4569	NaN	NaN	NaN	NaN	NaN	NaN
3096	6	6	8.3	94.615	0	11.367	530350000	17	Q86WA8;Q86WA8-2	Q86WA8;Q86WA8-2	Lon protease homolog 2, peroxisomal	LONP2		+	-0.703861	2.39697	+	0.0485769	-1.1383	-0.540604	1.94165	+	0.0294299	-0.869023	NaN	NaN		NaN	NaN	25.5926	25.369	25.3364	24.8031	24.5559	24.8274	24.8308	25.0725	24.7729	NaN	NaN	NaN	NaN	NaN	NaN
1830	13	5	48.7	34.834	0	106.79	1126200000	47	P60891;P60891-2	P60891;P60891-2	Ribose-phosphate pyrophosphokinase 1	PRPS1			-0.70067	1.48095		0.0557727	-0.974147	-0.257427	0.79892		0.209634	-0.396715	0.548079	1.84992		0.0529268	0.867622	25.4556	25.3788	25.323	24.2872	24.739	25.0292	24.9542	25.4138	25.0171	26.8582	27.1107	27.1903	27.4822	27.7672	27.554
3294	16	16	31.2	71.635	0	54.697	9233600000	165	Q8NBJ5	Q8NBJ5	Procollagen galactosyltransferase 1	COLGALT1			-0.699029	1.94928	+	0.0473235	-1.06389	-0.216279	0.753398		0.27908	-0.342261	0.800165	0.478364		0.0939571	0.652544	29.517	29.4887	29.2943	28.5113	28.6975	28.9941	29.0702	29.4366	29.1444	26.508	24.3852	25.2201	25.4076	26.587	26.5193
2011	12	12	40.7	50.227	0	105.32	10129000000	173	P80303-2;P80303	P80303-2;P80303	Nucleobindin-2;Nesfatin-1	NUCB2	Known	+	-0.697224	1.88679	+	0.0476028	-1.05101	-0.333632	0.868285		0.125144	-0.491518	-0.796363	1.92729	+	0.0448325	-1.23513	29.4375	29.3789	29.3822	28.4942	28.5907	29.0221	28.8153	29.4096	28.9728	26.9131	26.8657	27.0032	26.3122	NaN	25.9497
3585	2	2	8.2	27.989	0.00024337	5.8744	667640000	20	Q969M3;Q969M3-3;Q969M3-2	Q969M3;Q969M3-3;Q969M3-2	Protein YIPF5	YIPF5			-0.696051	1.70628	+	0.0486093	-1.06701	-0.211515	0.582743		0.317223	-0.319573	NaN	NaN		NaN	NaN	25.5439	25.3946	25.2769	NaN	24.5546	24.8636	24.9272	25.4133	25.2404	NaN	NaN	NaN	NaN	NaN	NaN
3450	21	21	50.5	72.379	0	117.78	4876200000	126	Q8WVM8;Q8WVM8-3;Q8WVM8-2	Q8WVM8;Q8WVM8-3;Q8WVM8-2	Sec1 family domain-containing protein 1	SCFD1			-0.692061	3.62036	+	0.0368108	-1.24559	-0.0227776	0.170744		0.911936	-0.0413813	0.376158	0.668089		0.184716	0.497982	28.3249	28.2561	28.2816	27.6115	27.4987	27.6762	28.174	28.2944	28.3258	27.2946	26.6136	27.1536	27.1188	27.6279	27.4435
950	47	47	26.7	274.37	0	162.31	3034100000	176	P11717	P11717	Cation-independent mannose-6-phosphate receptor	IGF2R			-0.688333	1.39111		0.0566965	-0.941913	-0.514372	1.67693	+	0.034873	-0.804407	0.269482	0.946759		0.2567	0.425604	26.014	26.085	26.2454	25.5977	24.9891	25.6926	25.4316	25.8362	25.5336	29.1825	29.0257	28.9306	29.2635	29.1548	29.5289
5053	23	23	16.7	212.27	0	63.574	1063800000	67	Q9Y4I1-2;Q9Y4I1;Q9Y4I1-3;Q9ULV0	Q9Y4I1-2;Q9Y4I1;Q9Y4I1-3	Unconventional myosin-Va	MYO5A			-0.683794	1.25305		0.0595575	-0.943309	-0.290741	0.569301		0.209648	-0.406504	NaN	NaN		NaN	NaN	23.8288	23.8577	23.3585	NaN	22.8861	23.1097	23.4606	23.3213	NaN	NaN	NaN	NaN	NaN	NaN	NaN
1150	13	13	23.5	89.42	0	81.148	1027400000	71	P22059;Q969R2-6;Q969R2-3;Q969R2-2;Q969R2;Q969R2-5;Q969R2-4	P22059	Oxysterol-binding protein 1	OSBP			-0.683746	1.82091	+	0.0482933	-1.02418	-0.437045	1.34296		0.058956	-0.67011	NaN	NaN		NaN	NaN	25.3581	25.1752	25.585	24.4609	24.7473	24.8588	24.7462	25.0505	25.0105	NaN	NaN	NaN	NaN	NaN	NaN
1871	9	9	28.6	52.264	0	63.723	4095000000	76	P61619;P61619-3;Q9H9S3-2;Q9H9S3-3;Q9H9S3	P61619;P61619-3	Protein transport protein Sec61 subunit alpha isoform 1	SEC61A1			-0.683486	2.92045	+	0.0479149	-1.1718	-0.486923	1.80401	+	0.0363774	-0.784404	0.444157	0.685539		0.140166	0.558881	27.3716	27.2514	27.0872	26.5769	26.5424	26.5403	26.6915	26.9232	26.6346	28.9569	28.6812	28.9707	29.0512	29.8719	29.0181
3601	22	22	48.4	55.873	0	186.27	13739000000	251	Q96A33;Q96A33-2	Q96A33;Q96A33-2	Coiled-coil domain-containing protein 47	CCDC47			-0.681659	2.28055	+	0.048	-1.0935	-0.421543	3.04735	+	0.0399567	-0.769822	0.178902	1.60578		0.377582	0.324661	29.7742	29.7655	29.7156	29.0265	28.884	29.2999	29.2501	29.4016	29.339	29.3331	29.2377	29.4099	29.5103	29.4847	29.5224
142	9	9	15.2	84.685	0	25.76	1131300000	29	O00469;O00469-2;O00469-3	O00469;O00469-2	Procollagen-lysine,2-oxoglutarate 5-dioxygenase 2	PLOD2			-0.679544	2.39751	+	0.0505172	-1.10636	0.26342	1.136		0.174943	0.432509	NaN	NaN		NaN	NaN	26.43	26.2083	26.0937	25.633	25.6101	25.4504	26.4209	26.5793	26.5222	NaN	NaN	NaN	NaN	NaN	NaN
2738	4	4	9.2	75.483	0	11.993	324140000	7	Q5PRF9	Q5PRF9	Protein Smaug homolog 2	SAMD4B			-0.678743	1.83361	+	0.0464161	-1.07161	NaN	NaN		NaN	NaN	NaN	NaN		NaN	NaN	24.7819	24.8569	24.6774	23.9387	24.2479	NaN	NaN	NaN	NaN	NaN	NaN	NaN	NaN	NaN	NaN
4042	2	2	20	12.017	0.00023343	4.9409	551150000	23	Q9BV81	Q9BV81	ER membrane protein complex subunit 6	EMC6			-0.676521	3.1784	+	0.0462609	-1.24003	0.0017662	0.0102763		0.989353	0.003173	NaN	NaN		NaN	NaN	25.2619	25.1801	25.1942	24.5782	NaN	24.4928	25.1124	25.263	25.266	NaN	NaN	NaN	NaN	NaN	NaN
3614	5	5	30	23.435	0	53.427	320280000	22	Q96AJ9-1;Q96AJ9	Q96AJ9-1;Q96AJ9	Vesicle transport through interaction with t-SNAREs homolog 1A	VTI1A			-0.675196	1.68088	+	0.0494061	-1.03713	NaN	NaN		NaN	NaN	NaN	NaN		NaN	NaN	24.4904	24.2969	24.3083	NaN	23.519	23.8611	NaN	NaN	NaN	NaN	NaN	NaN	NaN	NaN	NaN
1293	14	14	61.4	36.032	0	130.8	6322500000	137	P30519;P30519-2	P30519;P30519-2	Heme oxygenase 2	HMOX2			-0.672793	1.60168		0.0561582	-0.971496	0.263852	0.717348		0.211054	0.394895	0.604277	0.934608		0.0685424	0.75319	28.8358	28.5808	28.2838	27.8128	27.7615	28.1076	28.7892	28.7663	28.9363	26.6047	26.6637	27.334	27.8388	27.3831	27.1934
706	12	12	76.1	24.579	0	60.147	5181000000	184	P00492	P00492	Hypoxanthine-guanine phosphoribosyltransferase	HPRT1			-0.66998	1.83767	+	0.0488408	-1.01152	-0.0910047	0.240574		0.683052	-0.140194	0.316196	0.884953		0.204805	0.474433	28.2009	27.9254	28.2127	27.1784	27.5873	27.5633	27.8865	28.2526	27.9269	28.6521	28.5797	28.5394	28.6013	29.1591	28.9593
4782	3	3	12.9	28.32	0	8.4987	221590000	21	Q9UHQ4;Q9UHQ4-2	Q9UHQ4;Q9UHQ4-2	B-cell receptor-associated protein 29	BCAP29			-0.6691	2.06906	+	0.0472676	-1.04735	-0.170686	0.55727		0.406323	-0.268462	NaN	NaN		NaN	NaN	23.8395	24.2519	24.0636	23.2757	23.3544	23.5176	23.9861	23.7619	23.8949	NaN	NaN	NaN	NaN	NaN	NaN
3425	8	8	18.4	53.579	0	50.426	4743800000	82	Q8WTV0-4;Q8WTV0-2;Q8WTV0-3;Q8WTV0-5;Q8WTV0	Q8WTV0-4;Q8WTV0-2;Q8WTV0-3;Q8WTV0-5;Q8WTV0	Scavenger receptor class B member 1	SCARB1			-0.665611	2.12362	+	0.0479429	-1.05105	-0.944203	3.81206	+	0.0092459	-1.66292	-1.00662	1.16027	+	0.0462996	-1.10865	28.6224	28.5172	28.7413	27.8573	27.8328	28.194	27.6426	27.707	27.6987	25.79	25.8397	26.0206	25.2594	25.2978	24.0733
4234	5	5	7.3	81.835	0	11.067	458270000	15	Q9H2J7;Q9H2J7-2;Q9H2J7-3	Q9H2J7;Q9H2J7-2	Sodium-dependent neutral amino acid transporter B(0)AT2	SLC6A15			-0.665244	1.45428		0.0567115	-0.933761	-1.35581	5.0823	+	0.0181053	-2.48067	NaN	NaN		NaN	NaN	25.4535	25.3669	25.3464	24.38	24.6868	25.1043	24.0254	24.0938	23.9802	NaN	NaN	NaN	NaN	NaN	NaN
695	5	5	67.3	11.268	0	35.317	3901900000	74	P00167-2;P00167;P00167-3	P00167-2;P00167;P00167-3	Cytochrome b5	CYB5A	Predicted	+	-0.660124	2.7241	+	0.049982	-1.11768	-0.0270627	0.24101		0.895586	-0.0497222	0.189419	0.67353		0.410488	0.30178	27.6184	27.6307	27.6662	26.873	26.9057	27.1563	27.6668	27.5292	27.638	28.1328	27.9648	28.1544	28.0578	28.4383	28.3242
1446	11	11	58.7	26.458	0	40.293	979080000	46	P41227;P41227-2;Q9BSU3	P41227;P41227-2	N-alpha-acetyltransferase 10	NAA10			-0.655139	1.51115		0.0569855	-0.935357	-0.767914	2.59048	+	0.0170651	-1.24978	NaN	NaN		NaN	NaN	24.459	24.562	24.6606	23.5234	24.0663	24.1265	23.8857	23.8965	23.5956	NaN	NaN	NaN	NaN	NaN	NaN
189	4	4	26.8	18.624	0	12.746	1828700000	35	O14735-3;O14735;O14735-2	O14735-3;O14735	CDP-diacylglycerol--inositol 3-phosphatidyltransferase	CDIPT	Predicted		-0.654807	2.43024	+	0.0488	-1.07731	-0.172177	0.564767		0.402925	-0.270974	0.622603	1.71916	+	0.0496263	1.06015	26.9139	26.8721	26.915	26.1126	26.457	26.167	26.5424	26.9899	26.6522	25.8224	25.6764	NaN	26.4198	26.3242	NaN
4719	6	6	15.2	54.489	0	32.62	2656700000	66	Q9UBM7	Q9UBM7	7-dehydrocholesterol reductase	DHCR7			-0.653641	1.85886	+	0.0497073	-0.996233	-0.36819	3.67586		0.0544264	-0.696492	0.0945021	0.384192		0.658497	0.15659	27.2715	27.2991	27.2338	26.3259	26.6609	26.8567	26.8689	26.9412	26.8897	27.2598	27.0731	27.3574	27.2691	27.2577	27.447
1816	3	3	37.5	9.9743	0	12.519	3247100000	36	P60468	P60468	Protein transport protein Sec61 subunit beta	SEC61B			-0.648895	1.47715		0.0554286	-0.92219	-0.321489	1.25424		0.113118	-0.518266	NaN	NaN		NaN	NaN	27.7613	27.6191	27.7632	26.7274	27.0566	27.413	27.1793	27.5482	27.4517	NaN	NaN	NaN	NaN	NaN	NaN
2911	23	23	27.9	123.51	0	57.853	2425900000	97	Q6PKG0;Q6PKG0-3;Q659C4-7;Q659C4-6;Q659C4-5;Q659C4-2;Q659C4;Q659C4-9	Q6PKG0;Q6PKG0-3	La-related protein 1	LARP1			-0.648855	1.63033		0.0561436	-0.95158	-0.823265	2.81327	+	0.0107009	-1.3562	0.615455	1.05915		0.0636176	0.796127	26.6322	26.9176	26.679	26.0396	25.85	26.3925	25.9469	26.0079	25.8042	27.7925	27.9496	28.2519	28.304	29.0801	28.4562
2203	12	12	22.6	83.267	0	32.081	1766000000	41	Q12797-10;Q12797;Q12797-7;Q12797-4;Q12797-3;Q12797-9;Q12797-6;Q12797-11;Q12797-5;Q12797-8;Q12797-2	Q12797-10;Q12797	Aspartyl/asparaginyl beta-hydroxylase	ASPH			-0.645763	2.15175	+	0.0463129	-1.02998	-0.0923538	1.11696		0.614988	-0.17138	NaN	NaN		NaN	NaN	27.0083	26.9638	27.0256	26.2806	26.1816	26.5981	26.9118	26.9636	26.8452	NaN	NaN	NaN	NaN	NaN	NaN
3379	7	7	20.4	42.127	0	12.478	1272700000	28	Q8TB61-3;Q8TB61-2;Q8TB61;Q8TB61-5;Q8TB61-4	Q8TB61-3;Q8TB61-2;Q8TB61;Q8TB61-5;Q8TB61-4	Adenosine 3-phospho 5-phosphosulfate transporter 1	SLC35B2			-0.642849	1.0287		0.0707389	-0.810217	-0.708285	1.78311	+	0.024293	-1.04434	NaN	NaN		NaN	NaN	26.0718	25.8117	25.5108	24.6728	25.3265	25.4665	24.9559	25.2115	25.1021	NaN	NaN	26.8855	27.3342	27.3976	27.888
3673	3	3	18.4	33.224	0	15.546	321530000	3	Q96E22	Q96E22	Dehydrodolichyl diphosphate syntase complex subunit NUS1	NUS1			-0.642504	1.77044		0.056648	-0.968958	-0.622602	1.69574	+	0.0249081	-0.934077	NaN	NaN		NaN	NaN	24.6052	25.0268	24.4955	24.1048	24.0437	24.0516	24.0661	24.1617	24.0319	NaN	NaN	NaN	NaN	NaN	NaN
249	10	9	39.5	23.818	0	70.604	5275000000	91	O15173;O15173-2	O15173;O15173-2	Membrane-associated progesterone receptor component 2	PGRMC2	Predicted		-0.642426	2.01049	+	0.0497107	-1.00604	-0.21412	1.95417		0.216306	-0.390765	0.657621	1.06034		0.0582787	0.830907	28.1346	28.0435	27.9914	27.1827	27.4193	27.6402	27.8374	27.8853	27.8045	27.5831	28.4562	28.3636	28.6716	28.9701	28.734
2155	4	4	22.3	37.337	0	9.7785	570320000	23	Q07820;Q07820-2	Q07820;Q07820-2	Induced myeloid leukemia cell differentiation protein Mcl-1	MCL1	Predicted		-0.642402	2.1623	+	0.0467297	-1.02711	-1.31406	3.7507	+	0.0132308	-2.19814	NaN	NaN		NaN	NaN	25.4568	25.3418	25.1295	24.5052	24.7461	24.7496	23.9738	23.9782	24.0339	NaN	NaN	NaN	NaN	NaN	NaN
2922	13	13	33.1	58.042	0	38.775	1711500000	41	Q6UW63	Q6UW63	KDEL motif-containing protein 1	KDELC1			-0.642073	1.75318		0.0563333	-0.965594	-0.330555	1.02881		0.117783	-0.50787	0.730553	1.6239	+	0.0496556	1.03518	26.7561	26.4535	26.341	25.8281	25.714	26.0823	26.0377	26.3356	26.1856	26.3235	26.7102	26.2032	26.901	27.3775	27.15
3894	6	6	26.7	22.456	0	17.941	1533300000	58	Q99653	Q99653	Calcineurin B homologous protein 1	CHP1			-0.642024	1.70378		0.0573545	-0.957154	-0.30132	0.9235		0.150323	-0.461835	NaN	NaN		NaN	NaN	26.9539	26.8066	26.7044	26.2275	25.8911	26.4203	26.3757	26.7884	26.397	NaN	NaN	NaN	NaN	25.0305	NaN
4089	31	31	39.4	101.27	0	87.906	2412000000	102	Q9BXJ9;Q9BXJ9-4;Q6N069;Q6N069-5;Q6N069-4;Q6N069-3;Q6N069-2	Q9BXJ9	N-alpha-acetyltransferase 15, NatA auxiliary subunit	NAA15			-0.641563	0.348597		0.17592	-0.5077	-0.55996	0.488332		0.0912379	-0.560362	-0.267111	0.508859		0.322054	-0.36597	27.028	25.9457	26.0869	24.5822	25.6088	26.9448	26.4454	25.1795	25.7557	28.7911	28.4324	28.4961	28.6983	28.1908	28.0292
2895	5	5	19.2	43.332	0	15.918	771750000	23	Q6P4E1-2;Q6P4E1-5;Q6P4E1;Q6P4E1-4;Q6P4E1-3	Q6P4E1-2;Q6P4E1-5;Q6P4E1;Q6P4E1-4	Protein CASC4	CASC4			-0.641095	3.14928	+	0.049434	-1.12852	-0.373635	1.01802		0.0927938	-0.555778	NaN	NaN		NaN	NaN	25.9792	25.7991	25.8114	25.2041	25.2907	25.1717	25.1763	25.7191	25.5734	NaN	NaN	NaN	NaN	NaN	NaN
3187	3	3	5.9	68.34	0	7.917	151100000	8	Q8IZ52-4;Q8IZ52;Q8IZ52-2	Q8IZ52-4;Q8IZ52;Q8IZ52-2	Chondroitin sulfate synthase 2	CHPF			-0.640538	0.9236		0.074659	-0.804566	-0.747189	1.46235	+	0.0239461	-1.01363	NaN	NaN		NaN	NaN	24.0384	23.426	23.6904	22.8257	NaN	23.3298	23.0326	23.2078	22.6728	NaN	NaN	NaN	NaN	NaN	NaN
4401	13	13	24.3	67.887	0	105.5	14547000000	250	Q9HD45	Q9HD45	Transmembrane 9 superfamily member 3	TM9SF3			-0.638011	2.85247	+	0.049561	-1.09812	-0.516485	2.89677	+	0.0264694	-0.916018	-0.0642185	0.172532		0.779873	-0.100204	29.9534	30.0274	29.8443	29.2045	29.2915	29.4151	29.4257	29.4861	29.3638	29.3798	29.0081	29.1517	29.0123	29.2954	29.0394
3313	12	12	35.4	56.974	0	46.502	1582200000	54	Q8NC56;Q8NC56-2	Q8NC56;Q8NC56-2	LEM domain-containing protein 2	LEMD2			-0.637604	2.005	+	0.0498634	-0.999337	-0.203555	0.697587		0.314546	-0.321573	0.832977	0.463267		0.0951868	0.669895	26.6319	26.6064	26.5542	26.0972	26.0949	25.6877	26.1351	26.5585	26.4884	25.1004	25.2164	26.5324	NaN	25.8475	27.0512
3137	8	8	17.4	81.836	0	28.831	733330000	35	Q8IVL6;Q8IVL6-2	Q8IVL6;Q8IVL6-2	Prolyl 3-hydroxylase 3	LEPREL2			-0.636477	1.97811	+	0.0498554	-0.994076	0.0901502	0.233615		0.687704	0.138362	NaN	NaN		NaN	NaN	25.7649	25.5187	25.354	24.788	24.8978	25.0423	25.4628	25.783	25.6623	NaN	NaN	NaN	NaN	NaN	NaN
2169	13	13	35	65.33	0	173.9	13749000000	182	Q08380	Q08380	Galectin-3-binding protein	LGALS3BP			-0.63304	2.62829	+	0.0480299	-1.06902	0.4133	2.24652		0.0514755	0.716975	0.0690517	0.0275024		0.885083	0.0514239	29.9044	29.6499	29.7447	29.2064	29.0265	29.167	30.1616	30.1613	30.2159	24.6064	25.9065	23.7093	25.4305	23.7111	25.2878
1788	7	7	23.3	42.139	0	38.85	1162200000	42	P56589	P56589	Peroxisomal biogenesis factor 3	PEX3			-0.632879	2.50019	+	0.0483212	-1.05524	-0.238152	1.92784		0.176657	-0.429658	NaN	NaN		NaN	NaN	26.5569	26.4106	26.3894	25.8792	25.6522	25.9268	26.229	26.1877	26.2256	NaN	NaN	NaN	NaN	NaN	NaN
2099	26	26	48	83.549	0	148.72	10753000000	283	Q02809;Q02809-2	Q02809;Q02809-2	Procollagen-lysine,2-oxoglutarate 5-dioxygenase 1	PLOD1			-0.632284	3.19544	+	0.0504364	-1.11844	-0.0321751	0.277138		0.877048	-0.058859	0.0821501	0.18798		0.726969	0.123153	29.3988	29.2756	29.3058	28.6141	28.6726	28.7966	29.2834	29.3483	29.252	28.3805	28.3566	28.7407	28.3682	28.7517	28.6043
927	32	31	28.2	177.6	0	141.35	4817700000	153	P11047	P11047	Laminin subunit gamma-1	LAMC1	Known	+	-0.631921	3.11125	+	0.0505965	-1.11126	0.165389	1.75347		0.345205	0.304876	NaN	NaN		NaN	NaN	28.4021	28.3466	28.3246	27.6523	27.6705	27.8547	28.4539	28.5726	28.5429	NaN	NaN	NaN	NaN	NaN	NaN
2141	11	10	22	79.237	0	41.351	1183500000	33	Q06481-4;Q06481-2;Q06481-3;Q06481-6;Q06481;Q06481-5	Q06481-4;Q06481-2;Q06481-3;Q06481-6;Q06481;Q06481-5	Amyloid-like protein 2	APLP2			-0.627445	0.9647		0.0745632	-0.779819	-2.21919	3.58435	+	0	-3.25332	NaN	NaN		NaN	NaN	26.8225	26.6189	27.1574	26.5351	25.7184	26.463	24.4633	24.7232	24.7548	NaN	NaN	NaN	NaN	NaN	NaN
1210	35	21	58.9	67.819	0	222.21	21394000000	331	P26038	P26038	Moesin	MSN			-0.627259	2.3648	+	0.0466301	-1.03232	0.0323048	0.164622		0.882483	0.0562915	NaN	NaN		NaN	NaN	30.6562	30.5574	30.5045	29.7786	29.9397	30.118	30.5931	30.7126	30.5092	NaN	NaN	NaN	NaN	NaN	NaN
802	14	14	20.5	111.13	0	36.094	977280000	42	P06756-3;P06756-2;P06756	P06756-3;P06756-2;P06756	Integrin alpha-V;Integrin alpha-V heavy chain;Integrin alpha-V light chain	ITGAV			-0.624777	1.95403		0.0544598	-0.976329	-0.0296071	0.0987235		0.896304	-0.0487348	0.623531	1.23691		0.0557496	0.846336	25.8762	25.9832	25.9546	25.0505	25.3822	25.507	25.8945	26.0927	25.7379	25.099	24.7876	25.0918	25.2334	25.9707	25.6449
3050	9	9	17.7	75.388	0	31.231	2014000000	53	Q86SF2	Q86SF2	N-acetylgalactosaminyltransferase 7	GALNT7			-0.618979	2.19425	+	0.0494	-1.00093	-0.087436	0.617296		0.656236	-0.15513	NaN	NaN		NaN	NaN	27.2737	27.1735	27.1594	26.3683	26.6313	26.75	27.0108	27.1794	27.154	NaN	NaN	NaN	NaN	NaN	NaN
4345	19	19	37.1	62.223	0	101.44	19304000000	267	Q9HA77	Q9HA77	Probable cysteine--tRNA ligase, mitochondrial	CARS2	Known	+	-0.618198	5.13429	+	0.0448444	-1.18748	-0.289803	3.81943		0.0927553	-0.556544	-0.0559006	0.137029		0.808342	-0.0859149	30.5087	30.4921	30.5506	29.9137	29.9057	29.8774	30.217	30.2498	30.2151	25.4428	25.4974	25.2377	25.3971	25.5224	25.0906
2647	15	15	28.5	83.393	0	53.715	3699000000	117	Q32P28;Q32P28-4;Q32P28-3;Q32P28-2;Q8IVL5-2;Q8IVL5	Q32P28;Q32P28-4;Q32P28-3	Prolyl 3-hydroxylase 1	LEPRE1			-0.617615	2.13407	+	0.0489704	-0.991618	-0.0429084	0.0885574		0.867346	-0.0638291	0.28885	1.48053		0.19104	0.489227	27.7508	27.815	27.4666	27.0137	26.9865	27.1794	27.3932	27.8598	27.6506	27.4666	27.365	27.4676	27.5721	27.7317	27.8619
4609	6	6	70.1	10.134	0	104.42	6943500000	103	Q9NYJ1;Q9NYJ1-2	Q9NYJ1;Q9NYJ1-2	Cytochrome c oxidase assembly factor 4 homolog, mitochondrial	COA4	Known	+	-0.61484	2.06345		0.0543488	-0.978951	0.258759	1.38831		0.167003	0.440856	-0.14528	0.529152		0.514042	-0.233992	28.5017	28.2559	28.5087	27.8477	27.622	27.9521	28.6635	28.6479	28.7311	28.7509	28.9579	29.0223	28.935	28.6346	28.7257
2308	9	9	39.1	47.687	0	67.284	803620000	41	Q13501;Q13501-2	Q13501;Q13501-2	Sequestosome-1	SQSTM1			-0.613544	1.71481		0.0562264	-0.926912	-0.881555	3.01667	+	0.012129	-1.55386	0.444836	0.591243		0.157956	0.532002	25.6806	25.748	25.586	25.2678	25.1506	24.7556	NaN	24.8292	24.7508	25.9169	26.0187	25.0053	25.9011	26.2061	26.1682
138	6	4	11.1	81.544	0	13.533	255310000	10	O00459;Q92569-3;Q92569-2;Q92569	O00459	Phosphatidylinositol 3-kinase regulatory subunit beta	PIK3R2			-0.606948	1.6126		0.0606812	-0.902769	NaN	NaN		NaN	NaN	NaN	NaN		NaN	NaN	24.7617	24.3362	24.8541	23.9266	24.0522	24.1524	NaN	23.8218	NaN	NaN	NaN	NaN	NaN	NaN	NaN
1656	35	35	67	79.685	0	323.31	30436000000	542	P51659;P51659-3;P51659-2	P51659;P51659-3;P51659-2	Peroxisomal multifunctional enzyme type 2;(3R)-hydroxyacyl-CoA dehydrogenase;Enoyl-CoA hydratase 2	HSD17B4		+	-0.606214	3.23101	+	0.0482171	-1.07998	0.129133	0.972891		0.476876	0.229698	0.498117	1.63964		0.0641155	0.779908	30.5679	30.5471	30.4136	29.8449	29.8912	29.9738	30.5765	30.7108	30.6287	30.9503	30.9333	31.0927	31.2465	31.6863	31.5379
2623	3	3	6.5	61.437	0.00024195	5.7188	242680000	12	Q16880	Q16880	2-hydroxyacylsphingosine 1-beta-galactosyltransferase	UGT8			-0.604748	2.691	+	0.0472778	-1.03425	-0.285765	1.20951		0.142612	-0.46768	NaN	NaN		NaN	NaN	24.3123	24.071	24.2227	23.6914	23.5504	23.5499	23.7623	23.9274	24.059	NaN	NaN	NaN	NaN	NaN	NaN
4414	4	4	26.4	26.47	0	28.719	3068500000	57	Q9NPA0	Q9NPA0	ER membrane protein complex subunit 7	EMC7			-0.601202	2.7391	+	0.0469517	-1.03338	-0.270127	1.4258		0.153054	-0.459272	NaN	NaN		NaN	NaN	27.937	27.7767	27.7407	27.2493	27.1094	27.2921	27.4199	27.6031	27.6211	NaN	NaN	NaN	NaN	NaN	NaN
4272	6	4	28.9	33.81	0	21.486	1417200000	27	Q9H4A6	Q9H4A6	Golgi phosphoprotein 3	GOLPH3	Known	+	-0.598563	1.53236		0.0608696	-0.879932	-0.465492	1.11583		0.0588732	-0.668636	0.323451	0.371698		0.31412	0.374183	25.9933	26.43	26.321	25.5004	25.5536	25.8948	25.4932	25.9587	25.896	25.8962	26.4851	26.7308	26.6975	27.1555	26.2294
5004	8	8	36.8	29.642	0	40.29	1589000000	51	Q9Y320-2;Q9Y320	Q9Y320-2;Q9Y320	Thioredoxin-related transmembrane protein 2	TMX2	Predicted		-0.594466	1.29497		0.0684354	-0.831227	-0.626028	2.45411	+	0.0245673	-1.04069	0.318574	1.06191		0.185271	0.497008	26.6052	26.3423	26.3078	25.5665	25.7022	26.2032	25.7158	25.8219	25.8396	26.848	26.8665	27.1228	27.112	27.477	27.2041
4436	5	5	37.4	20.361	0	17.791	1425000000	27	Q9NQE9	Q9NQE9	Histidine triad nucleotide-binding protein 3	HINT3		+	-0.590684	2.45816	+	0.0492619	-0.991791	-0.21106	1.25817		0.24861	-0.364694	0.63787	1.29853		0.052785	0.873543	26.4175	26.2393	26.5026	25.8255	25.6877	25.8741	26.1645	26.1595	26.2021	25.6742	25.9612	25.6801	25.9918	26.6514	26.5861
324	10	10	41.2	47.119	0	43.611	3331900000	98	O43505	O43505	Beta-1,4-glucuronyltransferase 1	B4GAT1			-0.589715	2.71119	+	0.0490909	-1.01396	-0.145058	1.37532		0.415139	-0.264107	NaN	NaN		NaN	NaN	27.973	27.9534	27.8743	27.2152	27.3386	27.4777	27.7118	27.8385	27.8152	NaN	NaN	NaN	NaN	NaN	NaN
3296	7	7	20.9	46.189	0	22.095	790250000	40	Q8NBL1	Q8NBL1	Protein O-glucosyltransferase 1	POGLUT1			-0.589708	3.19634	+	0.0482878	-1.05137	-0.192321	0.991299		0.306844	-0.32543	-0.155083	0.549689		0.493627	-0.248191	25.3263	25.3079	25.2129	24.6113	24.6839	24.7829	24.9606	25.0623	25.2473	26.1686	26.2365	26.312	25.8813	26.2892	26.0814
2456	8	8	14.7	75.688	0	14.023	684610000	15	Q14CZ7	Q14CZ7	FAST kinase domain-containing protein 3	FASTKD3	Known	+	-0.587961	1.47696		0.0657037	-0.858903	-0.397605	1.03408		0.0825369	-0.584223	NaN	NaN		NaN	NaN	25.9056	25.87	25.3544	25.2182	25.0661	25.0819	25.3169	25.2589	25.3614	NaN	NaN	NaN	NaN	NaN	NaN
853	8	7	7.3	155.54	0	19.354	438150000	26	P08581;P08581-2;P08581-3	P08581;P08581-2	Hepatocyte growth factor receptor	MET			-0.587226	1.46604		0.0658901	-0.856202	-0.715633	2.67851	+	0.0207872	-1.19069	NaN	NaN		NaN	NaN	25.3689	25.1131	25.0385	24.348	24.5292	24.8815	24.4738	24.47	24.4298	NaN	NaN	NaN	NaN	NaN	NaN
1246	20	20	36.4	75.475	0	126.89	8911600000	230	P28288;P28288-2;P28288-3	P28288;P28288-2	ATP-binding cassette sub-family D member 3	ABCD3	Predicted	+	-0.582917	2.83686	+	0.0494118	-1.01428	-0.053833	0.846261		0.778491	-0.10166	0.512854	1.45645		0.064464	0.772951	29.017	28.9275	28.9417	28.338	28.285	28.5145	28.9282	28.8953	28.9012	28.8992	28.8162	28.9144	29.0949	29.6477	29.4258
2958	16	16	24.5	103.88	0	78.763	3575600000	108	Q6ZXV5-2;Q6ZXV5	Q6ZXV5-2;Q6ZXV5	Transmembrane and TPR repeat-containing protein 3	TMTC3	Predicted		-0.581904	2.52183		0.0514854	-0.985461	0.0411644	0.394988		0.840974	0.0756661	-0.0634375	0.0241851		0.900053	-0.046649	27.9262	27.9461	27.9398	27.2936	27.2395	27.5333	27.8936	28.0385	28.0035	24.2916	25.3571	23.6338	23.606	25.1221	NaN
1650	5	5	36.4	18.998	0	28.704	6333900000	83	P51571	P51571	Translocon-associated protein subunit delta	SSR4			-0.581621	2.36403		0.0558427	-0.969627	-0.206219	1.50832		0.245764	-0.366144	0.140583	0.308033		0.56627	0.204907	28.6129	28.4886	28.4096	27.7799	27.9282	28.0582	28.3019	28.3336	28.257	28.5617	28.403	28.6818	28.3554	28.8813	28.8315
3551	15	15	14.7	154.3	0	43.69	776170000	38	Q92859-3;Q92859-2;Q92859-4;Q92859	Q92859-3;Q92859-2;Q92859-4;Q92859	Neogenin	NEO1			-0.5815	2.80741	+	0.0485316	-1.00977	NaN	NaN		NaN	NaN	0.542432	2.75041	+	0.0506979	0.946193	25.8813	25.6494	25.774	25.159	25.1438	25.2573	NaN	NaN	24.4392	26.1014	26.2033	26.099	26.7851	26.6846	26.5613
4668	4	4	36.6	20.574	0	38.747	1553800000	51	Q9P0T7	Q9P0T7	Transmembrane protein 9	TMEM9			-0.581369	2.31925		0.0554098	-0.964662	-0.681688	3.07249	+	0.0212211	-1.1839	0.162547	0.621041		0.47527	0.266035	26.49	26.5152	26.7085	26.102	25.8449	26.0227	25.8363	25.9447	25.8877	26.5539	NaN	26.6707	26.6643	26.9281	26.7322
4950	8	8	49.6	30.338	0	25.214	1999200000	52	Q9Y287;Q9Y287-2	Q9Y287	Integral membrane protein 2B;BRI2, membrane form;BRI2 intracellular domain;BRI2C, soluble form;Bri23 peptide	ITM2B			-0.573116	3.0271	+	0.0487742	-1.01349	-1.98643	4.97705	+	0	-3.46985	NaN	NaN		NaN	NaN	27.5108	27.4907	27.4246	26.9019	26.7984	27.0065	25.4032	25.6224	25.4412	26.1998	26.2667	NaN	NaN	NaN	NaN
4533	11	11	32.4	40.683	0	51.351	2095100000	57	Q9NV96;Q9NV96-2;Q9NV96-3;Q3MIR4	Q9NV96;Q9NV96-2;Q9NV96-3	Cell cycle control protein 50A	TMEM30A			-0.572289	2.23797		0.05644	-0.943688	-0.556495	2.37924	+	0.0251117	-0.935892	0.305927	3.62845		0.127365	0.583312	26.9412	26.8731	27.0783	26.2363	26.5397	26.3998	26.352	26.5522	26.3189	26.9662	26.9583	27.0257	27.2703	27.3118	27.286
1526	6	6	35.4	16.46	0	19.24	1784400000	47	P47813;O14602	P47813;O14602	Eukaryotic translation initiation factor 1A, X-chromosomal;Eukaryotic translation initiation factor 1A, Y-chromosomal	EIF1AX;EIF1AY			-0.570594	1.08184		0.0760325	-0.762879	-0.320501	2.09901		0.0890057	-0.56704	NaN	NaN		NaN	NaN	24.8963	24.8085	24.801	23.7839	24.4143	24.5959	24.5917	24.5506	24.4021	NaN	NaN	NaN	NaN	NaN	NaN
2237	4	4	58.9	10.061	0	31.363	1861600000	35	Q13015	Q13015	Protein AF1q	MLLT11			-0.568438	2.51076		0.0560221	-0.965081	-0.779921	2.8415	+	0.0133525	-1.3724	0.288621	0.774141		0.251132	0.429639	26.5799	26.5565	26.648	25.9633	25.9218	26.194	NaN	25.8932	25.7366	27.6845	27.7156	27.4156	27.6084	28.0514	28.0218
1546	4	4	10.6	55.527	0	14.385	840730000	18	P48651;P48651-3;P48651-2	P48651;P48651-3;P48651-2	Phosphatidylserine synthase 1	PTDSS1			-0.568308	1.47409		0.0678333	-0.837264	-0.14105	0.186625		0.597723	-0.178845	0.564343	0.564551		0.123188	0.643931	25.9834	25.52	25.4357	24.9718	25.1517	25.1107	25.0842	25.5428	25.889	25.1869	25.0955	NaN	25.3319	26.0792	NaN
4026	5	5	23.8	26.423	0	12.213	842420000	26	Q9BUN8-2;Q9BUN8	Q9BUN8-2;Q9BUN8	Derlin-1	DERL1			-0.567214	1.68		0.0639544	-0.868055	-0.693729	2.09557	+	0.0254561	-1.08145	NaN	NaN		NaN	NaN	25.8225	25.4161	25.4367	24.9123	25.1471	24.9143	24.7645	24.9036	24.9261	NaN	NaN	NaN	NaN	NaN	NaN
5030	3	3	16.7	15.425	0	12.408	1301800000	40	Q9Y3E0	Q9Y3E0	Vesicle transport protein GOT1B	GOLT1B			-0.562775	1.88656		0.0606333	-0.890605	-0.761578	3.72508	+	0.00989474	-1.36595	NaN	NaN		NaN	NaN	26.4191	26.4848	26.3694	25.6151	25.9279	26.042	25.5732	25.6842	25.7312	NaN	NaN	NaN	NaN	NaN	NaN
3441	9	9	44.7	23.865	0	41.185	1917100000	68	Q8WUY1	Q8WUY1	Protein THEM6	THEM6			-0.559347	1.67458		0.0663764	-0.858042	-0.247847	2.38342		0.154996	-0.457259	0.567964	1.47408		0.0571191	0.836888	26.8412	26.9595	26.9538	26.0765	26.4294	26.5706	26.641	26.6992	26.6709	26.2992	26.1213	26.3437	26.5974	27.1447	26.7259
3340	3	3	9.3	41.625	0	25.322	831900000	37	Q8NEW0	Q8NEW0	Zinc transporter 7	SLC30A7			-0.557971	1.47248		0.0687417	-0.825729	-0.191035	0.5222		0.371311	-0.289109	NaN	NaN		NaN	NaN	26.0109	25.8748	25.8718	25.1052	25.2964	25.682	25.4221	25.9129	25.8494	NaN	NaN	NaN	NaN	NaN	NaN
4762	22	22	37.6	87.996	0	95.343	10764000000	193	Q9UGP8	Q9UGP8	Translocation protein SEC63 homolog	SEC63			-0.557789	3.46175	+	0.0497368	-1.01562	-0.00513713	0.044571		0.975428	-0.00952446	0.340979	1.77843		0.127849	0.581803	29.3999	29.3346	29.3084	28.7779	28.7255	28.8661	29.2883	29.3546	29.3846	28.3976	28.2329	28.4544	28.6378	28.8115	28.6586
539	5	3	6.7	98.828	0	13.146	28346000000	15	O75891;O75891-3;O75891-4;O75891-2	O75891;O75891-3;O75891-4;O75891-2	Cytosolic 10-formyltetrahydrofolate dehydrogenase	ALDH1L1	Known	+	-0.556909	2.84906		0.0553829	-0.975576	NaN	NaN		NaN	NaN	NaN	NaN		NaN	NaN	30.9787	30.8352	30.9235	30.2433	30.3923	30.431	NaN	30.2521	NaN	NaN	NaN	NaN	NaN	NaN	NaN
552	27	27	27.1	152.93	0	99.117	6536000000	196	O75976;O75976-2	O75976;O75976-2	Carboxypeptidase D	CPD			-0.556623	1.92502		0.0607347	-0.887596	-0.169111	1.06931		0.362271	-0.294448	0.701804	1.2858	+	0.0502074	0.92841	28.85	28.6681	28.6423	28.0265	28.0852	28.3789	28.5331	28.6193	28.5007	27.2126	27.0457	27.2657	27.3836	28.1558	28.0901
131	42	42	52.4	138.62	0	290.59	16149000000	437	O00411	O00411	DNA-directed RNA polymerase, mitochondrial	POLRMT	Known	+	-0.555963	4.14873	+	0.0469371	-1.04348	-0.234378	2.76658		0.166922	-0.441097	-0.011905	0.0537306		0.948919	-0.0206563	29.9513	30.0338	29.9395	29.3911	29.4302	29.4355	29.7428	29.7219	29.7569	29.243	29.4265	29.3839	29.3519	29.4231	29.2427
4957	12	12	75.3	20.652	0	130.76	17325000000	271	Q9Y2B0;Q9Y2B0-2	Q9Y2B0	Protein canopy homolog 2	CNPY2			-0.555213	2.73459		0.0551087	-0.964358	-0.0820675	0.574213		0.672097	-0.145609	0.185548	0.660743		0.419862	0.295835	30.0667	30.0929	30.0484	29.4265	29.4533	29.6626	29.8679	30.0778	30.0161	28.9721	28.8584	29.1373	29.0354	29.3641	29.125
4733	3	3	7.2	72.615	0	15.945	427340000	20	Q9UBT7-3;Q9UBT7-2;Q9UBT7	Q9UBT7-3;Q9UBT7-2;Q9UBT7	Alpha-catulin	CTNNAL1			-0.554555	1.54937		0.0683711	-0.834048	-0.666245	2.16306	+	0.0245057	-1.05747	NaN	NaN		NaN	NaN	25.2623	25.0574	25.038	24.2695	24.684	24.7404	24.2361	24.5572	24.5655	NaN	NaN	NaN	NaN	NaN	NaN
679	13	13	54.9	33.392	0	67.762	1712700000	58	O95861;O95861-4;O95861-2;O95861-3	O95861;O95861-4;O95861-2;O95861-3	3(2),5-bisphosphate nucleotidase 1	BPNT1	Predicted		-0.554389	0.530993		0.134478	-0.577558	-0.800063	0.830829	+	0.030758	-0.84529	0.815411	5.55145	+	0.0483137	1.56403	25.9552	26.5941	25.173	24.9458	25.4973	25.6159	24.8092	25.4139	25.0989	27.7378	27.6989	27.7045	28.4952	28.5384	28.5538
5111	10	10	36.1	36.946	0	44.193	2556000000	89	Q9Y673;Q9Y673-2	Q9Y673;Q9Y673-2	Dolichyl-phosphate beta-glucosyltransferase	ALG5			-0.554343	2.27362		0.0559442	-0.92271	-0.0126769	0.0394372		0.952801	-0.0208083	0.404219	0.620649		0.174955	0.509875	27.4412	27.3044	27.1205	26.7389	26.7995	26.6647	27.1616	27.3408	27.3256	26.234	26.1843	26.1796	26.2783	27.1868	26.3456
1642	8	8	44.3	22.837	0	39.508	4130300000	100	P51151;Q9NP90	P51151	Ras-related protein Rab-9A	RAB9A			-0.553422	2.60059		0.0564082	-0.950958	0.210344	0.987184		0.267706	0.350634	0.969063	1.6373	+	0.0464615	1.33657	27.8988	28.0756	28.1668	27.5338	27.454	27.4932	28.1978	28.3805	28.1938	24.9874	25.4815	25.1994	NaN	26.3642	26.0194
3725	5	5	23.5	37.226	0	17.408	405300000	12	Q96GS4	Q96GS4	Uncharacterized protein C17orf59	C17orf59			-0.553017	2.7406		0.0565838	-0.961506	-0.30239	1.49315		0.117359	-0.509277	NaN	NaN		NaN	NaN	24.907	24.9604	24.7357	24.258	24.3157	24.3705	24.4408	24.6586	24.5967	NaN	NaN	NaN	NaN	NaN	NaN
260	11	11	33	52.743	0	44.345	1734300000	39	O15269;O15269-2	O15269	Serine palmitoyltransferase 1	SPTLC1			-0.551627	1.54055		0.0691525	-0.829391	-0.363992	0.98448		0.0999313	-0.540594	0.239254	1.40622		0.269726	0.41302	26.2436	26.4518	26.4871	25.5515	25.9572	26.0188	25.9961	25.779	26.3154	27.1612	27.1644	27.21	27.3539	27.327	27.5724
2444	121	121	51.3	367.42	0	323.31	21662000000	594	Q14789-4;Q14789-3;Q14789;Q14789-2	Q14789-4;Q14789-3;Q14789;Q14789-2	Golgin subfamily B member 1	GOLGB1			-0.551242	1.89649		0.0614375	-0.87731	-0.391231	1.63852		0.0653547	-0.642399	0.0249011	0.0929559		0.905042	0.0418099	30.5582	30.4695	30.3167	29.7766	29.8034	30.1108	29.8976	30.1777	30.0955	29.7107	29.7784	29.7383	29.6953	29.6539	29.9529
2050	11	11	17.5	96.959	0	36.702	879830000	55	P98194-2;P98194-4;P98194;P98194-3;P98194-5;P98194-9;P98194-6;P98194-7;P98194-8	P98194-2;P98194-4;P98194;P98194-3;P98194-5;P98194-9;P98194-6;P98194-7;P98194-8	Calcium-transporting ATPase type 2C member 1	ATP2C1			-0.542033	2.33493		0.060905	-0.911328	-0.455507	2.88274	+	0.0333061	-0.81811	0.0721684	0.243477		0.741076	0.116959	25.6126	25.6132	25.656	24.9112	25.112	25.2324	25.062	25.231	25.2222	25.9898	26.1419	26.3725	26.1812	26.3067	26.2328
2695	9	9	14.5	97.41	0	14.724	422710000	18	Q53R41;Q53R41-2	Q53R41;Q53R41-2	FAST kinase domain-containing protein 1	FASTKD1	Known	+	-0.541385	1.29119		0.074085	-0.77723	-0.259671	1.37692		0.166797	-0.441591	NaN	NaN		NaN	NaN	24.6563	24.614	24.6277	24.0208	23.7923	24.4608	24.2582	24.544	24.3168	NaN	NaN	NaN	NaN	NaN	NaN
352	5	5	31.4	29.176	0	29.882	930050000	30	O43752;O43752-2	O43752;O43752-2	Syntaxin-6	STX6			-0.541164	1.51081		0.0713032	-0.813057	-1.03548	3.15457	+	0.0078	-1.8133	0.312986	0.965188		0.200126	0.480135	25.8945	25.9592	25.9866	25.1247	25.4016	25.6904	24.8285	24.994	NaN	25.7497	25.7513	25.7759	25.7688	26.2311	26.216
1952	8	3	51.3	17.965	0	66.26	4328200000	73	P62979	P62979	Ubiquitin-40S ribosomal protein S27a;Ubiquitin;40S ribosomal protein S27a	RPS27A			-0.540999	0.705556		0.107155	-0.636527	-0.896393	2.38969	+	0.0102545	-1.37609	0.228714	1.36268		0.2888	0.395416	26.8334	26.6938	26.7871	25.5359	26.6002	26.5552	25.6231	26.1279	25.8741	29.5439	29.4039	29.5704	29.7052	29.8486	29.6507
3293	7	7	25.3	44.272	0	34.976	2283600000	66	Q8NBJ4-2;Q8NBJ4	Q8NBJ4-2;Q8NBJ4	Golgi membrane protein 1	GOLM1			-0.539558	1.50861		0.0711923	-0.810912	-0.508945	1.68986	+	0.0357628	-0.799337	NaN	NaN		NaN	NaN	27.6216	27.573	27.273	26.7522	26.9173	27.1794	26.8155	27.0703	27.055	NaN	NaN	NaN	NaN	NaN	NaN
846	22	22	40.1	69.81	0	105.19	5414500000	187	P08240;P08240-2	P08240;P08240-2	Signal recognition particle receptor subunit alpha	SRPR			-0.538868	2.37802		0.0606306	-0.91073	-0.118348	0.747891		0.532137	-0.206664	0.214038	0.788246		0.352877	0.342284	28.4904	28.4185	28.3197	27.7734	27.8154	28.0232	28.2448	28.3974	28.2314	27.4492	27.3307	27.587	27.537	27.8681	27.6038
4903	9	9	30.2	55.051	0	94.499	1648500000	66	Q9UNW1;Q9UNW1-4;Q9UNW1-3;Q9UNW1-2	Q9UNW1;Q9UNW1-4	Multiple inositol polyphosphate phosphatase 1	MINPP1			-0.538015	2.55295		0.0564695	-0.924324	-0.198936	1.79086		0.252423	-0.361844	0.149249	0.591256		0.500107	0.243559	26.6785	26.7114	26.5511	25.9926	26.2208	26.1136	26.4298	26.4613	26.453	26.3738	26.1422	26.3962	26.2973	26.5429	26.5198
2853	7	7	28.7	27.248	0	16.981	1403300000	49	Q6IQ22	Q6IQ22	Ras-related protein Rab-12	RAB12			-0.537978	3.0592		0.0559786	-0.960164	-0.0402991	0.298187		0.846371	-0.0726302	0.284387	1.04285		0.227181	0.452775	26.4168	26.4539	26.538	25.8903	26.0282	25.8762	26.4653	26.4761	26.3464	25.3492	25.1165	25.5264	25.5216	25.6817	25.642
3183	9	9	22.7	69.156	0	29.486	1889300000	64	Q8IYS2;Q8IYS2-2	Q8IYS2;Q8IYS2-2	Uncharacterized protein KIAA2013	KIAA2013	Predicted		-0.537455	2.38778		0.0600893	-0.909573	-0.129602	0.631817		0.501999	-0.218769	NaN	NaN		NaN	NaN	27.1292	27.1387	27.0385	26.4261	26.5485	26.7195	26.8449	27.1381	26.9346	NaN	NaN	NaN	NaN	NaN	NaN
2601	9	9	11.8	131.14	0	17.906	960080000	24	Q16706	Q16706	Alpha-mannosidase 2	MAN2A1			-0.533774	1.84863		0.0649714	-0.884335	-0.414165	3.76885	+	0.0377985	-0.780706	NaN	NaN		NaN	NaN	26.2807	26.3593	26.276	25.6407	NaN	25.9024	25.87	25.9181	25.8854	NaN	NaN	NaN	NaN	NaN	NaN
2459	9	9	48.8	34.833	0	81.02	2503000000	55	Q15006	Q15006	ER membrane protein complex subunit 2	EMC2	Predicted	+	-0.533243	2.09216		0.0613333	-0.875612	0.399803	1.72313		0.0612028	0.660943	0.488449	1.26554		0.076509	0.717146	26.951	26.7473	26.8465	26.4272	26.1331	26.3848	27.144	27.1797	27.4206	26.8407	26.9165	27.0825	27.2315	27.7649	27.3086
3613	13	13	47.6	34.93	0	216.11	64813000000	442	Q96AG4	Q96AG4	Leucine-rich repeat-containing protein 59	LRRC59	Known		-0.532371	2.59863		0.0554886	-0.919561	-0.330933	2.2386		0.0812257	-0.589348	0.277049	1.14174		0.2291	0.451135	32.2553	32.1229	32.0567	31.5188	31.6162	31.7028	31.7797	31.8153	31.847	30.4984	30.2008	30.3313	30.4972	30.7557	30.6086
3118	8	8	45.7	31.642	0	129.3	3727400000	70	Q86Y82	Q86Y82	Syntaxin-12	STX12			-0.531289	1.27917		0.0757705	-0.764672	-0.640773	1.69027	+	0.0246215	-0.953433	0.855135	2.48471	+	0.0427611	1.34437	28.0211	28.0046	27.8341	27.4775	27.0767	27.7118	27.5448	27.3904	27.0023	26.6865	26.8452	26.9435	27.4683	27.8573	27.7151
649	27	25	52.2	80.419	0	174.53	9944800000	279	O95573	O95573	Long-chain-fatty-acid--CoA ligase 3	ACSL3	Predicted		-0.531153	2.10912		0.0610965	-0.874512	-0.0190417	0.0768075		0.924942	-0.0324258	0.379495	0.975319		0.141979	0.556182	29.1949	29.1631	28.9288	28.5012	28.4937	28.6984	29.0288	29.1004	29.1005	28.8526	28.4649	28.5012	28.783	29.2389	28.9352
3410	9	6	13	92.448	0	9.1885	186920000	9	Q8TDW0	Q8TDW0	Volume-regulated anion channel subunit LRRC8C	LRRC8C			-0.529696	1.20776		0.0787225	-0.776678	NaN	NaN		NaN	NaN	NaN	NaN		NaN	NaN	23.9475	23.9272	23.8798	23.6302	NaN	23.1468	24.3906	NaN	NaN	NaN	NaN	NaN	NaN	NaN	NaN
4845	3	3	4.2	72.995	0.00023855	5.3647	350420000	17	Q9UKV5	Q9UKV5	E3 ubiquitin-protein ligase AMFR	AMFR			-0.52874	2.3819		0.0603419	-0.896557	-0.0999826	0.303677		0.649578	-0.157708	NaN	NaN		NaN	NaN	24.699	24.5481	24.722	23.9951	24.1485	24.2394	24.3292	24.5911	24.7489	NaN	NaN	NaN	NaN	NaN	NaN
3645	9	9	18.8	80.277	0	25.978	1590700000	23	Q96CP6-3;Q96CP6;Q96CP6-2	Q96CP6-3;Q96CP6;Q96CP6-2	GRAM domain-containing protein 1A	GRAMD1A			-0.528645	2.30767		0.0603817	-0.889908	0.0843302	0.262345		0.701659	0.134242	NaN	NaN		NaN	NaN	26.8248	26.7803	26.7199	26.1009	26.2302	26.4079	26.7085	27.1064	26.763	NaN	NaN	NaN	NaN	NaN	NaN
3077	15	15	40.1	63.419	0	105.61	4345400000	90	Q86UY8;Q86UY8-2	Q86UY8;Q86UY8-2	5-nucleotidase domain-containing protein 3	NT5DC3	Known	+	-0.528264	1.21593		0.0783125	-0.750231	-0.518711	0.86498		0.0595636	-0.665921	0.375697	0.196881		0.406488	0.304574	27.9462	27.9035	28.234	27.154	27.6168	27.7281	27.3495	28.0156	27.1624	28.5357	26.5182	26.9229	28.0008	26.9131	28.19
4251	2	2	7.4	32.94	0.0050251	2.2824	503900000	4	Q9H3L0	Q9H3L0	Methylmalonic aciduria and homocystinuria type D protein, mitochondrial	MMADHC	Known	+	-0.528069	0.782883		0.0999298	-0.669505	-0.577306	1.18523	+	0.0360851	-0.791929	NaN	NaN		NaN	NaN	25.2623	25.8718	25.1685	24.8411	NaN	24.9712	24.8191	24.9777	24.7738	NaN	NaN	NaN	NaN	NaN	NaN
4202	13	7	66.7	22.171	0	135.96	3237200000	82	Q9H0U4;Q92928	Q9H0U4	Ras-related protein Rab-1B	RAB1B			-0.527475	3.1367		0.0558384	-0.947943	-0.240693	0.905113		0.220633	-0.385673	0.148429	0.385035		0.531426	0.224126	27.1867	27.2656	27.1899	26.587	26.7476	26.7252	26.7858	27.2006	26.9337	28.2139	28.1778	28.2323	28.2158	28.6785	28.175
2065	5	5	21.2	21.493	0	10.154	5347300000	36	Q00765;Q00765-2	Q00765	Receptor expression-enhancing protein 5	REEP5			-0.526169	1.82229		0.0680415	-0.836711	-0.123363	0.475473		0.544438	-0.201393	NaN	NaN		NaN	NaN	28.5796	28.6283	28.336	27.8961	27.8972	28.1721	28.3091	28.5241	28.3407	NaN	NaN	NaN	NaN	NaN	NaN
4721	2	2	10.6	41.823	0	19.005	716840000	17	Q9UBN6	Q9UBN6	Tumor necrosis factor receptor superfamily member 10D	TNFRSF10D			-0.525058	2.69167		0.0577091	-0.915492	NaN	NaN		NaN	NaN	NaN	NaN		NaN	NaN	26.2396	26.3343	26.3138	25.7464	25.6677	25.8983	NaN	NaN	NaN	NaN	NaN	NaN	NaN	NaN	NaN
4467	9	9	45.1	31.076	0	37.513	3426000000	48	Q9NRG7-2;Q9NRG7;Q9NRG7-3	Q9NRG7-2;Q9NRG7	Epimerase family protein SDR39U1	SDR39U1	Predicted	+	-0.523029	3.19573		0.0567236	-0.944047	0.975253	2.92245	+	0.00772603	1.57633	-0.22497	0.188666		0.512705	-0.235318	27.0575	26.9163	27.0738	26.4601	26.5303	26.4882	27.7787	28.1273	28.0675	27.8793	27.9715	27.384	27.8565	28.0143	26.689
3145	31	30	51	84.159	0	190.73	4001200000	143	Q8IWA4;Q8IWA4-3;Q8IWA4-2	Q8IWA4;Q8IWA4-3	Mitofusin-1	MFN1	Known	+	-0.522505	2.48861		0.0600851	-0.896312	-0.38572	1.26205		0.0773093	-0.599479	-0.181354	1.35009		0.3803	-0.322236	27.2971	27.3174	27.3871	26.9644	26.7058	26.7638	27.095	26.6666	27.0828	28.9935	29.1755	29.0396	28.8576	28.9501	28.8568
3710	6	6	20.5	44.876	0	16.402	4316500000	68	Q96G23	Q96G23	Ceramide synthase 2	CERS2			-0.520574	0.930338		0.0907646	-0.683577	-0.245831	0.170331		0.468601	-0.235141	0.304502	1.2615		0.185411	0.496516	27.1865	27.786	27.7691	26.7179	27.2619	27.2	26.3199	27.9031	27.781	28.3663	28.1779	28.2651	28.4796	28.7729	28.4703
252	16	16	31.8	77.187	0	59.988	2439700000	79	O15228;O15228-2	O15228;O15228-2	Dihydroxyacetone phosphate acyltransferase	GNPAT			-0.519796	1.27596		0.0786457	-0.752149	0.428618	0.731345		0.0916861	0.557741	0.643523	0.920695		0.0642749	0.778614	27.1603	26.6241	26.643	26.2893	26.1591	26.4195	27.3517	27.5182	26.8432	26.6489	26.7494	26.7366	26.9266	27.9926	27.1463
2299	3	3	17.2	25.206	0	21.001	984790000	41	Q13445	Q13445	Transmembrane emp24 domain-containing protein 1	TMED1			-0.518216	2.17685		0.0658939	-0.863337	-0.0877978	0.302199		0.679096	-0.142036	NaN	NaN		NaN	NaN	26.1511	26.2362	26.0399	25.5854	25.5045	25.7826	25.8533	26.1976	26.1129	NaN	NaN	NaN	NaN	NaN	NaN
977	4	4	30	27.963	0	56.257	1355600000	62	P13284	P13284	Gamma-interferon-inducible lysosomal thiol reductase	IFI30			-0.516976	3.06561		0.0564929	-0.926941	0.07879	0.359506		0.703642	0.133239	NaN	NaN		NaN	NaN	26.461	26.6163	26.5248	26.0241	25.9515	26.0757	26.4751	26.7502	26.6132	NaN	NaN	NaN	NaN	NaN	NaN
4652	9	9	30.1	43.159	0	86.913	13081000000	182	Q9P035;Q9P035-2	Q9P035;Q9P035-2	Very-long-chain (3R)-3-hydroxyacyl-CoA dehydratase 3	HACD3			-0.515704	2.37749		0.0616784	-0.877381	0.0372257	0.168559		0.866957	0.0638116	0.470318	1.1037		0.0886555	0.671521	29.4023	29.3833	29.3473	28.9413	28.955	28.6895	29.3905	29.5671	29.2869	29.8663	29.581	29.7407	29.8521	30.4705	30.2763
1295	10	10	32.8	41.465	0	50.054	6588500000	114	P30533	P30533	Alpha-2-macroglobulin receptor-associated protein	LRPAP1			-0.515003	3.04317		0.0556852	-0.92248	-0.150153	1.46791		0.397212	-0.274276	NaN	NaN		NaN	NaN	28.9218	28.8945	28.8513	28.2958	28.3477	28.4791	28.6626	28.8106	28.7439	NaN	NaN	NaN	NaN	NaN	NaN
3965	11	11	31.9	53.96	0	76.943	2688900000	77	Q9BRR6-2;Q9BRR6;Q9BRR6-3;Q9BRR6-4;Q9BRR6-5;Q9BRR6-6	Q9BRR6-2;Q9BRR6	ADP-dependent glucokinase	ADPGK			-0.514238	2.66201		0.0606009	-0.896928	0.0233784	0.253562		0.908347	0.0435674	NaN	NaN		NaN	NaN	27.512	27.4503	27.4559	26.8921	26.8837	27.0997	27.4345	27.5288	27.5251	NaN	NaN	NaN	NaN	NaN	NaN
2500	6	6	5.7	162.1	0	15.192	928810000	24	Q15262;Q15262-2;Q15262-3;Q15262-4;P28827;P28827-2	Q15262;Q15262-2;Q15262-3;Q15262-4	Receptor-type tyrosine-protein phosphatase kappa	PTPRK			-0.513339	1.66927		0.073296	-0.802187	-0.342156	2.33919		0.0754824	-0.61136	NaN	NaN		NaN	NaN	26.1126	26.1107	26.1076	25.3179	25.7183	25.7547	25.763	25.8739	25.6675	NaN	NaN	NaN	NaN	NaN	NaN
2307	13	13	34.5	68.763	0	119.29	2645000000	73	Q13492-2;Q13492-5;Q13492;Q13492-3;Q13492-4	Q13492-2;Q13492-5;Q13492;Q13492-3;Q13492-4	Phosphatidylinositol-binding clathrin assembly protein	PICALM			-0.512417	0.714819		0.113338	-0.619157	-0.773455	1.13443	+	0.0252067	-0.942501	0.840585	1.25064	+	0.0495132	1.03073	27.6293	26.9253	27.1783	26.3278	26.6649	27.2029	26.3064	26.9543	26.1518	27.2303	27.0662	27.6317	27.6266	28.5043	28.3191
240	4	4	25.1	37.866	0	26.566	3290100000	56	O15121	O15121	Sphingolipid delta(4)-desaturase DES1	DEGS1			-0.512181	2.76925		0.06071	-0.901091	-0.0987485	0.813076		0.599443	-0.177539	-0.122354	0.0500449		0.798827	-0.0925291	27.5948	27.5546	27.4194	27.0141	26.9343	27.0838	27.387	27.4438	27.4417	28.0652	27.5309	26.214	27.704	NaN	26.5914
1837	3	3	17.8	20.313	0.00025562	7.1136	790830000	26	P61009	P61009	Signal peptidase complex subunit 3	SPCS3			-0.510057	1.78911		0.071074	-0.812448	-0.338059	1.91824		0.0823408	-0.585329	NaN	NaN		NaN	NaN	25.6961	25.457	25.4925	24.8351	25.1036	25.1767	25.2411	25.2213	25.1689	NaN	NaN	NaN	NaN	NaN	NaN
4522	8	7	26.2	53.261	0	16.758	643930000	25	Q9NUQ7	Q9NUQ7	Ufm1-specific protease 2	UFSP2			-0.507842	0.757723		0.110839	-0.645488	-0.168355	0.412507		0.440255	-0.249972	0.595073	1.16935		0.0621694	0.835385	25.3969	25.2074	25.0457	NaN	24.3666	25.051	24.7908	25.2753	25.0788	NaN	24.9343	25.0184	25.2826	25.8455	25.5861
5148	6	6	15.5	51.641	0	14.749	1235800000	32	Q9Y6X5;Q6UWV6	Q9Y6X5	Bis(5-adenosyl)-triphosphatase ENPP4	ENPP4			-0.506366	2.82847		0.0598305	-0.895857	0.0310116	0.250849		0.88283	0.0564866	NaN	NaN		NaN	NaN	26.3358	26.464	26.3592	25.9758	25.8668	25.7973	26.3856	26.4755	26.391	NaN	NaN	NaN	NaN	NaN	NaN
2773	10	10	22.9	54.785	0	24.773	1450500000	46	Q5T8D3-2;Q5T8D3-3;Q5T8D3;Q5T8D3-4;Q8NC06;Q8NC06-2;Q8NC06-3	Q5T8D3-2;Q5T8D3-3;Q5T8D3;Q5T8D3-4	Acyl-CoA-binding domain-containing protein 5	ACBD5			-0.505539	1.96428		0.0685149	-0.825442	0.0889874	0.589474		0.652276	0.156827	NaN	NaN		NaN	NaN	26.6527	26.6929	26.5526	25.9233	26.1897	26.2685	26.616	26.768	26.7811	NaN	NaN	NaN	NaN	NaN	NaN
1485	8	7	17.9	64.293	0	16.646	975040000	30	P43250-3;P43250;P43250-2;P32298-3;P32298-4;P32298-2;P32298	P43250-3;P43250;P43250-2	G protein-coupled receptor kinase 6	GRK6			-0.50403	2.00111		0.0696644	-0.8271	-0.499135	2.20565	+	0.0313742	-0.839192	0.57333	0.844499		0.0792684	0.703299	25.5675	25.3163	25.4332	24.7732	24.9943	25.0374	24.9566	25.036	24.827	25.6246	25.5652	25.6658	26.8009	26.0192	25.7556
1049	33	33	60.9	76.689	0	247.32	9470000000	263	P16435	P16435	NADPH--cytochrome P450 reductase	POR	Predicted		-0.503618	2.49307		0.0637252	-0.868711	-0.138671	1.20919		0.439918	-0.250357	0.271656	0.707106		0.280115	0.402235	28.7774	28.8241	28.8509	28.1773	28.3214	28.443	28.6002	28.7701	28.6662	29.5424	29.341	29.6683	29.5225	30.0306	29.8136
2257	15	12	63.1	30.54	0	142.54	57079000000	425	Q13162	Q13162	Peroxiredoxin-4	PRDX4	Known	+	-0.503519	2.63711		0.0610551	-0.878877	-0.120847	1.23991		0.496107	-0.221426	-0.0144997	0.0352983		0.944345	-0.0226914	32.001	31.9782	31.8917	31.3771	31.4008	31.5825	31.7763	31.8825	31.8496	28.3514	28.2286	28.5168	28.2913	28.5664	28.1956
2689	12	12	52.6	34.324	0	66.411	7886100000	166	Q53GQ0;Q53GQ0-2	Q53GQ0	Very-long-chain 3-oxoacyl-CoA reductase	HSD17B12			-0.503117	2.06568		0.0686689	-0.832098	-0.192914	1.50888		0.276071	-0.345035	0.33312	1.36786		0.150344	0.542767	29.0764	28.9509	28.9119	28.3644	28.4062	28.6593	28.758	28.7514	28.851	27.9048	27.7085	27.8889	27.987	28.3079	28.2066
3743	8	8	46.2	35.61	0	117.84	6390100000	163	Q96HY6;Q96HY6-2	Q96HY6;Q96HY6-2	DDRGK domain-containing protein 1	DDRGK1			-0.502908	2.19252		0.066414	-0.84337	-0.34109	1.77534		0.0834386	-0.581782	0.125285	0.181182		0.643769	0.164159	28.8532	28.8738	28.7037	28.2269	28.2277	28.4674	28.3994	28.6044	28.4036	26.0954	26.4004	26.9023	26.6437	26.7645	26.3656
5010	4	4	15.4	35.198	0.00024919	6.4131	215070000	18	Q9Y385	Q9Y385	Ubiquitin-conjugating enzyme E2 J1	UBE2J1			-0.502887	1.56781		0.0741808	-0.776641	-0.207482	1.05993		0.267752	-0.350484	NaN	NaN		NaN	NaN	23.8614	24.0023	24.077	23.3915	23.3017	23.7389	23.8839	23.7817	23.6528	NaN	NaN	NaN	NaN	NaN	NaN
2149	10	10	15.4	109.24	0	21.147	1158900000	24	Q07075	Q07075	Glutamyl aminopeptidase	ENPEP			-0.502836	1.54789		0.0753933	-0.773973	-0.903285	2.59496	+	0.01128	-1.42419	NaN	NaN		NaN	NaN	26.5292	26.231	26.6794	25.9728	26.1021	25.8562	25.5551	25.5468	25.6279	NaN	NaN	NaN	NaN	NaN	NaN
2458	7	7	31.9	25.003	0	42.182	3127700000	56	Q15005	Q15005	Signal peptidase complex subunit 2	SPCS2	Predicted		-0.502419	1.61946		0.0751512	-0.782663	-0.320955	1.50861		0.100985	-0.536381	0.234646	0.888904		0.311107	0.376623	27.5101	27.4363	27.3397	26.7682	26.8199	27.1908	27.1021	27.2579	26.9632	27.839	27.6027	27.7222	27.8593	28.1606	27.8479
1954	13	13	57.1	25.206	0	29.005	2373400000	100	P62993;P62993-2	P62993;P62993-2	Growth factor receptor-bound protein 2	GRB2			-0.502008	1.44383		0.0776043	-0.758787	-0.793872	2.48365	+	0.0153121	-1.26731	0.320604	1.20765		0.171834	0.513164	26.8075	26.8303	27.0485	26.1097	26.5195	26.5511	25.9102	26.25	26.1445	27.9422	27.9814	28.0504	28.1235	28.5368	28.2756
99	3	3	21.8	25.668	0	19.503	269220000	6	O00124-2;O00124-3;O00124	O00124-2;O00124-3;O00124	UBX domain-containing protein 8	UBXN8			-0.499598	1.12544		0.0871963	-0.727991	NaN	NaN		NaN	NaN	NaN	NaN		NaN	NaN	24.827	24.8303	24.4219	NaN	24.108	24.2789	NaN	23.6095	NaN	NaN	NaN	NaN	NaN	NaN	NaN
2996	27	27	52.1	86.573	0	263.88	9088700000	196	Q7L8L6	Q7L8L6	FAST kinase domain-containing protein 5	FASTKD5	Known	+	-0.498922	2.80076		0.0614137	-0.882479	-0.000263214	0.00203275		0.995136	-0.000485389	0.0757732	0.680286		0.696375	0.137613	29.0624	29.016	29.1515	28.4836	28.587	28.6626	29.0501	29.0795	29.0995	28.7074	28.7412	28.8044	28.8712	28.7431	28.8661
3787	6	6	23.1	37.137	0	14.054	1252900000	26	Q96L58	Q96L58	Beta-1,3-galactosyltransferase 6	B3GALT6			-0.496467	1.63988		0.0742336	-0.777914	0.09139	0.225107		0.686883	0.138747	0.548696	0.329497		0.218715	0.472	26.1109	26.038	26.2994	25.4248	25.7742	25.7599	25.9652	26.3979	26.3594	NaN	24.4294	25.255	26.2943	25.0256	24.8528
4502	18	18	33.9	66.966	0	65.252	4284000000	164	Q9NTJ5;Q9NTJ5-2	Q9NTJ5;Q9NTJ5-2	Phosphatidylinositide phosphatase SAC1	SACM1L			-0.49622	2.4356		0.0656751	-0.853447	0.0233733	0.127039		0.912286	0.0411906	0.206508	1.15866		0.336558	0.353723	27.9327	27.9095	28.0454	27.4013	27.3919	27.6058	27.8881	28.0693	28.0004	27.639	27.5186	27.6306	27.6563	27.853	27.8983
98	28	28	62.5	72.911	0	174.11	10780000000	246	O00116	O00116	Alkyldihydroxyacetonephosphate synthase, peroxisomal	AGPS			-0.492765	2.44483		0.0652766	-0.849013	0.147231	0.724699		0.444002	0.248289	0.396706	1.45313		0.101436	0.632915	29.2481	29.1161	29.1086	28.6181	28.5805	28.7959	29.1776	29.4558	29.2811	29.0388	28.7879	29.0265	29.1559	29.4687	29.4187
3222	11	11	36.7	45.096	0	39.287	941950000	37	Q8N2K0;Q8N2K0-2;Q8N2K0-3	Q8N2K0;Q8N2K0-2;Q8N2K0-3	Monoacylglycerol lipase ABHD12	ABHD12			-0.49202	1.77538		0.0748214	-0.78791	0.0225557	0.0549135		0.920876	0.035151	NaN	NaN		NaN	NaN	25.6197	25.6673	25.8438	25.0271	25.2421	25.3855	25.4925	25.7985	25.9074	NaN	NaN	NaN	NaN	NaN	NaN
361	5	5	19.5	34.566	0	14.774	841620000	38	O43808	O43808	Peroxisomal membrane protein PMP34	SLC25A17		+	-0.491872	2.60868		0.065948	-0.859189	-0.0366548	0.167979		0.868761	-0.0629438	NaN	NaN		NaN	NaN	25.9839	25.7431	25.9055	25.3713	25.3701	25.4156	25.7845	25.9226	25.8155	NaN	NaN	NaN	NaN	NaN	NaN
574	20	20	34.8	89.594	0	117.72	4593800000	121	O94874;O94874-2;O94874-3	O94874;O94874-2;O94874-3	E3 UFM1-protein ligase 1	UFL1			-0.491298	0.635822		0.134289	-0.579091	-0.0199451	0.016527		0.950037	-0.0221513	0.618804	0.197031		0.332818	0.382663	28.7485	27.7333	27.6917	27.5362	27.5091	27.6542	27.7797	27.8971	28.4368	NaN	27.6979	26.37	28.5511	26.7544	NaN
129	49	5	61.9	123.63	0	323.31	1625600000	63	O00410;O00410-3	O00410;O00410-3	Importin-5	IPO5			-0.490549	1.1751		0.0867907	-0.704531	-0.0747849	0.126325		0.775505	-0.105033	0.269326	1.1452		0.238043	0.441085	26.4492	26.7017	26.6025	25.768	26.3974	26.1163	26.2553	26.7641	NaN	26.7193	26.8463	26.6355	26.8286	27.1413	27.0392
3113	5	5	16.3	46.172	0	25.493	4019900000	83	Q86XR7-2;Q9Y3B3-2;Q9Y3B3	Q86XR7-2;Q9Y3B3-2;Q9Y3B3	Transmembrane emp24 domain-containing protein 7	TMED7			-0.488572	1.78482		0.0745029	-0.784499	-0.21582	0.54769		0.31653	-0.320066	0.120996	0.315494		0.603929	0.184194	27.8795	27.7003	27.9044	27.1525	27.3519	27.5142	27.3326	27.8938	27.6104	27.8179	27.6251	27.823	27.5927	28.0464	27.9898
202	8	8	38.3	38.287	0	173.57	8883400000	187	O14828;O14828-2	O14828;O14828-2	Secretory carrier-associated membrane protein 3	SCAMP3			-0.48831	2.55228		0.0651815	-0.849954	-0.659574	2.33421	+	0.0249194	-1.07182	0.216048	0.593234		0.375349	0.325969	29.1895	29.1761	29.027	28.5558	28.6323	28.7395	28.3815	28.6767	28.3557	28.916	28.7777	28.6803	28.7265	29.2272	29.0685
2592	11	11	31.3	54.123	0	59.53	3069200000	80	Q16625-3;Q16625;Q16625-4;Q16625-2;Q16625-5	Q16625-3;Q16625;Q16625-4;Q16625-2;Q16625-5	Occludin	OCLN			-0.488255	1.53187		0.0779471	-0.754556	-0.533196	2.08115	+	0.0292442	-0.874418	NaN	NaN		NaN	NaN	28.0188	27.747	27.923	27.2207	27.3619	27.6415	27.3435	27.5027	27.2431	NaN	NaN	NaN	NaN	NaN	NaN
1378	12	5	56.5	29.221	0	323.31	7687400000	97	P35613-2;P35613;P35613-4	P35613-2;P35613;P35613-4	Basigin	BSG	Predicted		-0.487777	1.16279		0.0870917	-0.699566	-0.680039	1.96518	+	0.0242044	-1.04434	0.288305	1.2647		0.204139	0.474991	28.7955	28.7213	28.3769	27.9886	27.9999	28.4419	27.9404	28.0929	27.8203	28.7967	28.972	28.9255	29.1281	29.3689	29.0621
2726	15	14	11.6	237.67	0	28.471	715680000	35	Q5JSL3	Q5JSL3	Dedicator of cytokinesis protein 11	DOCK11			-0.486916	1.8624		0.0745465	-0.790432	-0.201317	0.437741		0.372109	-0.288762	NaN	NaN		NaN	NaN	25.5172	25.33	25.3482	24.715	24.9826	25.0371	25.2117	25.5152	24.8646	NaN	NaN	NaN	NaN	NaN	NaN
4483	3	3	8.6	50.494	0	20.416	937840000	24	Q9NRX5	Q9NRX5	Serine incorporator 1	SERINC1			-0.486855	2.26366		0.0692	-0.826476	-1.17868	4.23839	+	0.0122857	-2.08249	0.267991	0.740559		0.280002	0.40239	25.9002	25.9111	26.0479	25.4176	25.3671	25.614	24.7355	24.8657	24.722	25.7015	25.9053	25.575	25.7384	26.1972	26.0502
2493	7	7	39.2	37.98	0	105.5	1440500000	45	Q15165-3;Q15165;Q15165-1	Q15165-3;Q15165;Q15165-1	Serum paraoxonase/arylesterase 2	PON2			-0.485457	2.09225		0.0705143	-0.810147	0.16736	1.02669		0.369784	0.290285	NaN	NaN		NaN	NaN	26.1296	26.0883	26.2717	25.559	25.6387	25.8357	26.4112	26.3491	26.2315	NaN	NaN	NaN	NaN	NaN	NaN
1980	5	5	22.6	18.988	0	14.935	1670400000	60	P67812-4;P67812;P67812-3;P67812-2	P67812-4;P67812;P67812-3;P67812-2	Signal peptidase complex catalytic subunit SEC11A	SEC11A			-0.484311	1.90728		0.0749333	-0.791449	-0.135569	0.592787		0.487309	-0.225118	0.368435	0.562273		0.212377	0.465871	26.6671	26.4619	26.7311	26.1049	26.0204	26.2819	26.3643	26.5174	26.5717	26.2965	26.1225	26.2885	26.3023	26.3361	27.1745
279	9	9	55.1	22.417	0	77.393	2180200000	83	O15498;O15498-2	O15498;O15498-2	Synaptobrevin homolog YKT6	YKT6			-0.48384	0.679446		0.130595	-0.587464	-0.383917	0.429921		0.17199	-0.435346	0.667561	1.27354		0.0529932	0.894988	25.8473	25.9952	26.1109	25.0287	25.3764	26.0967	24.9132	26.2004	25.688	28.3222	28.1806	28.283	28.5441	29.3764	28.868
4370	15	15	47.1	47.019	0	106.48	9672500000	192	Q9HC36	Q9HC36	rRNA methyltransferase 3, mitochondrial	RNMTL1	Known	+	-0.483818	2.45105		0.0678069	-0.836142	0.147772	1.00974		0.423639	0.259854	0.10051	0.394271		0.640744	0.165404	29.0606	29.2254	29.2297	28.7058	28.5842	28.7742	29.2843	29.2747	29.4	27.9717	27.9328	27.9411	28.1956	28.1108	27.8407
4127	22	22	34.6	96.955	0	114.2	6406600000	187	Q9BZF1-3;Q9BZF1-2;Q9BZF1;Q9H0X9-3;Q9H0X9-2;Q9H0X9	Q9BZF1-3;Q9BZF1-2;Q9BZF1	Oxysterol-binding protein-related protein 8	OSBPL8			-0.480798	2.32004		0.0684197	-0.82207	-0.0641441	0.356671		0.755965	-0.11158	0.304621	0.79124		0.230396	0.449463	28.5359	28.4605	28.4951	27.8971	27.9785	28.1736	28.3871	28.5735	28.3385	28.2943	28.1414	28.357	28.3849	28.8998	28.4218
683	8	8	63.4	19.206	0	62.045	11008000000	155	O95881	O95881	Thioredoxin domain-containing protein 12	TXNDC12	Known	+	-0.480764	2.37771		0.0689701	-0.826313	0.114768	0.998305		0.530467	0.207192	0.167044	0.32453		0.513014	0.234805	29.5691	29.4869	29.549	29.0458	28.9235	29.1933	29.5834	29.7428	29.6231	26.8516	26.3508	26.8114	26.6161	27.0895	26.8093
1074	25	23	58	66.69	0	197.11	4799700000	158	P17812;P17812-2	P17812;P17812-2	CTP synthase 1	CTPS1			-0.480618	0.716457		0.124143	-0.595821	-0.59477	1.06899	+	0.0378692	-0.781044	0.660962	2.38683	+	0.0450453	1.08029	26.8694	26.5981	26.3102	25.5907	26.383	26.3621	25.7538	26.4067	25.8329	29.6545	29.4065	29.7366	30.1911	30.3611	30.2284
323	5	5	96.7	9.6138	0	276.26	7295100000	113	O43504	O43504	Ragulator complex protein LAMTOR5	LAMTOR5			-0.479655	1.7416		0.0759557	-0.768398	-0.460851	1.71864	+	0.0458636	-0.741756	0.115083	0.725288		0.572062	0.200974	28.9815	28.7731	29.0997	28.5568	28.313	28.5456	28.3482	28.6016	28.5219	27.6643	27.7292	27.8359	27.8074	27.9635	27.8038
2639	6	6	20.1	59.308	0	25.823	629980000	22	Q2T9J0;Q2T9J0-2	Q2T9J0;Q2T9J0-2	Peroxisomal leader peptide-processing protease;Peroxisomal leader peptide-processing protease, 15 kDa form;Peroxisomal leader peptide-processing protease, 45 kDa form	TYSND1		+	-0.479542	1.66485		0.0769355	-0.759822	-0.201209	1.46953		0.258398	-0.357063	NaN	NaN		NaN	NaN	25.5561	25.4444	25.5603	24.9114	24.9191	25.2917	25.4001	25.2251	25.332	NaN	NaN	NaN	NaN	NaN	NaN
4330	5	5	14.7	38.858	0.00024679	6.2012	341110000	11	Q9H939;Q9H939-2	Q9H939;Q9H939-2	Proline-serine-threonine phosphatase-interacting protein 2	PSTPIP2			-0.478038	1.16751		0.0900889	-0.71255	-0.169319	0.869889		0.374624	-0.286702	NaN	NaN		NaN	NaN	24.2364	24.2908	24.3252	23.5812	24.031	NaN	24.0182	24.0382	24.2881	NaN	NaN	NaN	NaN	NaN	NaN
5085	12	12	55.7	29.702	0	75.378	5091300000	116	Q9Y5M8	Q9Y5M8	Signal recognition particle receptor subunit beta	SRPRB			-0.477695	1.25642		0.0865893	-0.704093	-0.217992	0.848553		0.266022	-0.351987	0.378004	2.25996		0.0901109	0.663955	28.5094	28.473	28.1567	27.8899	27.6676	28.1485	28.2365	28.0944	28.1542	27.1258	27.2229	27.3231	27.532	27.6687	27.6051
4367	7	7	31.2	34.905	0	58.373	2744900000	68	Q9HC07;Q9HC07-2	Q9HC07;Q9HC07-2	Transmembrane protein 165	TMEM165			-0.477477	2.21186		0.0705949	-0.808863	-0.113111	0.791699		0.547789	-0.199855	0.0217463	0.0598791		0.92132	0.0347467	27.5771	27.4986	27.5432	26.9517	27	27.2347	27.3058	27.5107	27.4631	25.3627	25.3919	25.5284	25.4164	25.6631	25.2688
5110	3	3	7.5	58.12	0.00026205	7.8834	592510000	11	Q9Y672	Q9Y672	Dolichyl pyrophosphate Man9GlcNAc2 alpha-1,3-glucosyltransferase	ALG6			-0.476501	1.30933		0.0857197	-0.710693	-0.367299	1.64805		0.075575	-0.610488	NaN	NaN		NaN	NaN	25.6854	25.3639	25.4315	24.7976	25.2762	24.9776	25.1385	25.1666	25.0739	NaN	NaN	NaN	NaN	NaN	NaN
414	22	22	44	84.784	0	89.773	5234000000	156	O60568	O60568	Procollagen-lysine,2-oxoglutarate 5-dioxygenase 3	PLOD3			-0.475765	2.93156		0.0654388	-0.853265	0.224295	1.11887		0.230115	0.377427	0.17699	0.58328		0.446416	0.278576	28.029	27.9577	27.8562	27.5122	27.4172	27.4862	28.0168	28.2823	28.2167	28.6568	28.5496	28.6833	28.5533	28.9751	28.8921
1452	7	3	75.2	12.732	0	122.78	1618900000	41	P41567	P41567	Eukaryotic translation initiation factor 1	EIF1			-0.475345	1.04467		0.0955072	-0.665983	-0.96069	2.36318	+	0.01175	-1.44465	-0.017072	0.0140831		0.951396	-0.018945	26.5969	26.348	26.1491	25.7819	25.6636	26.2224	25.2254	25.5794	25.4071	27.0271	28.1826	27.1957	27.158	27.7672	27.429
2517	14	10	20.1	111.5	0	38.526	1431100000	24	Q15375-2;Q15375;Q15375-4;Q15375-3;Q15375-5;Q9UF33-2;Q9UF33-3;P54756-3;P54756-2;P54756;Q5JZY3-2;Q5JZY3-3;Q5JZY3	Q15375-2;Q15375;Q15375-4	Ephrin type-A receptor 7	EPHA7			-0.474887	1.66321		0.0780737	-0.753784	-0.873241	3.52362	+	0.00809639	-1.52059	NaN	NaN		NaN	NaN	26.9866	26.7619	26.9047	26.1888	26.4847	26.5551	25.9678	26.0799	25.9858	NaN	NaN	NaN	NaN	NaN	NaN
3971	15	15	46.8	46.971	0	81.423	10861000000	150	Q9BS26	Q9BS26	Endoplasmic reticulum resident protein 44	ERP44			-0.473665	1.86108		0.0751821	-0.772753	-0.0520153	0.16964		0.818227	-0.0844635	0.206838	0.488056		0.410094	0.302167	29.4844	29.4288	29.2879	28.8091	28.8527	29.1183	29.1532	29.4836	29.4082	28.162	27.9456	28.1202	27.9625	28.5526	28.3332
228	84	75	48.5	271.32	0	323.31	9068000000	336	O15020;O15020-2	O15020;O15020-2	Spectrin beta chain, non-erythrocytic 2	SPTBN2			-0.473248	1.03335		0.095493	-0.66182	-0.852512	2.27659	+	0.0134493	-1.30216	0.271595	1.11391		0.237669	0.441862	28.836	28.8405	28.7723	27.9564	28.3775	28.6951	27.8278	28.2694	27.794	30.087	30.1318	29.8851	30.1371	30.4175	30.3641
3270	26	26	38	111.69	0	128.32	9578800000	251	Q8N766-3;Q8N766-2;Q8N766;Q8N766-4	Q8N766-3;Q8N766-2;Q8N766;Q8N766-4	ER membrane protein complex subunit 1	EMC1			-0.473028	2.52644		0.0682895	-0.825027	-0.0426801	0.297367		0.839903	-0.0764559	0.18	0.3122		0.499043	0.244725	29.3343	29.2145	29.1949	28.6597	28.81	28.8549	29.146	29.2778	29.1917	27.8717	27.779	28.0357	28.131	28.4313	27.664
562	5	5	17.5	34.624	0	10.12	1463800000	22	O94766-2;O94766	O94766-2;O94766	Galactosylgalactosylxylosylprotein 3-beta-glucuronosyltransferase 3	B3GAT3			-0.472253	2.45775		0.0694984	-0.819271	-0.134487	1.3769		0.447775	-0.246495	NaN	NaN		NaN	NaN	26.7416	26.6423	26.7167	26.1056	26.3493	26.229	26.6107	26.5885	26.4979	NaN	NaN	NaN	NaN	NaN	NaN
1034	37	37	16.5	331.77	0	99.709	4701800000	139	P15924;P15924-3;P15924-2	P15924;P15924-3;P15924-2	Desmoplakin	DSP			-0.470535	1.43754		0.0839708	-0.721466	-0.229375	1.75171		0.195713	-0.41034	NaN	NaN		NaN	NaN	28.4637	28.4187	28.3806	27.6641	28.0145	28.1728	28.1589	28.2969	28.1191	NaN	NaN	NaN	NaN	NaN	NaN
1123	7	7	35.4	30.993	0	23.813	1890800000	55	P20645	P20645	Cation-dependent mannose-6-phosphate receptor	M6PR			-0.470104	2.119		0.0744819	-0.790863	-0.394552	2.58354		0.0522936	-0.705751	0.273133	1.86334		0.196552	0.483391	26.8246	26.6861	26.8736	26.3683	26.1769	26.4288	26.3719	26.3943	26.4344	26.9153	26.7544	26.7908	27.1044	27.0138	27.1618
3391	8	8	35.2	35.386	0	28.309	3234400000	62	Q8TC12;Q8TC12-2;Q8TC12-3	Q8TC12;Q8TC12-2;Q8TC12-3	Retinol dehydrogenase 11	RDH11		+	-0.469165	1.91416		0.0751111	-0.771745	0.110362	0.403853		0.597075	0.179214	0.400998	1.70597		0.0903148	0.661177	27.1112	26.9062	26.7567	26.447	26.403	26.5166	27.0056	27.1388	26.9608	28.1379	28.3437	28.0125	28.5414	28.6528	28.5029
2827	6	6	18.3	50.827	0	23.377	1891600000	27	Q68D85	Q68D85	Natural cytotoxicity triggering receptor 3 ligand 1	NCR3LG1			-0.468597	1.45381		0.083767	-0.72126	-0.720069	3.20024	+	0.0161718	-1.25408	NaN	NaN		NaN	NaN	27.2233	27.2199	27.321	26.5501	26.7553	27.053	26.4135	26.5483	26.6422	NaN	NaN	NaN	NaN	NaN	NaN
2800	11	11	22.7	82.809	0	32.964	787520000	42	Q5VUJ6-2;Q5VUJ6	Q5VUJ6-2;Q5VUJ6	Leucine-rich repeat and calponin homology domain-containing protein 2	LRCH2			-0.466014	1.22993		0.0905821	-0.687365	-0.581687	1.14547	+	0.0365298	-0.816344	0.473464	1.96277		0.0640978	0.782044	25.7788	25.2252	25.4625	24.8955	25.1622	25.0107	24.8423	24.9719	NaN	25.8769	25.9416	26.0616	26.3811	26.6097	26.3097
3254	7	7	50.4	15.278	0	85.565	8379600000	137	Q8N5K1	Q8N5K1	CDGSH iron-sulfur domain-containing protein 2	CISD2	Predicted	+	-0.465935	1.882		0.0756522	-0.7644	-0.515022	2.96386	+	0.0267423	-0.917829	0.209396	1.12376		0.333433	0.35634	29.2658	29.1926	29.0858	28.5692	28.6802	28.8971	28.6168	28.7254	28.657	27.8542	27.6081	27.8147	28.0389	27.9759	27.8903
259	6	6	46.5	17.97	0	65.685	7180400000	121	O15260-2;O15260;O15260-3	O15260-2;O15260;O15260-3	Surfeit locus protein 4	SURF4			-0.465705	1.50544		0.0841182	-0.724184	-0.174118	0.5509		0.401291	-0.272098	0.28908	0.851273		0.239651	0.439489	28.8486	28.7186	28.5381	28.0895	28.1645	28.4542	28.3162	28.6036	28.6632	28.0941	28.3252	28.5021	28.4204	28.7822	28.5861
4053	9	8	30.2	27.277	0	51.047	8459500000	111	Q9BVK6	Q9BVK6	Transmembrane emp24 domain-containing protein 9	TMED9			-0.465361	1.97638		0.0749721	-0.772158	-0.287683	1.22239		0.14034	-0.471176	0.094354	0.324944		0.667231	0.152359	29.1534	29.237	29.1026	28.5443	28.681	28.8716	28.6715	29.0015	28.9569	27.5307	27.3123	27.2471	27.3751	27.6235	27.3745
3303	20	20	53	47.628	0	129.37	35888000000	380	Q8NBS9;Q8NBS9-2	Q8NBS9;Q8NBS9-2	Thioredoxin domain-containing protein 5	TXNDC5			-0.463933	2.41158		0.0724625	-0.803642	-0.150292	1.05645		0.413547	-0.265137	0.256386	1.27437		0.248824	0.431356	31.3192	31.1568	31.1406	30.6824	30.6968	30.8456	31.065	31.1102	30.9906	29.5124	29.3402	29.5147	29.5926	29.8492	29.6946
541	3	3	20.7	21.614	0	41.089	2035100000	47	O75915	O75915	PRA1 family protein 3	ARL6IP5			-0.463631	4.24737		0.0616	-0.881723	0.3222	2.5482		0.0816019	0.586574	NaN	NaN		NaN	NaN	26.9826	26.9776	26.9638	26.5449	26.4618	26.5266	27.199	27.3438	27.3479	NaN	NaN	NaN	NaN	NaN	NaN
2553	14	14	37.7	56.598	0	179.03	40945000000	302	Q15758;Q15758-3;Q15758-2	Q15758;Q15758-3;Q15758-2	Neutral amino acid transporter B(0)	SLC1A5			-0.461295	1.90012		0.0769759	-0.759798	-0.939033	3.83098	+	0.00895238	-1.65707	0.244732	2.7855		0.219528	0.45971	31.7456	31.5886	31.6488	31.0239	31.217	31.3582	30.7276	30.8031	30.6352	28.9492	28.9316	28.9237	29.159	29.2413	29.1382
3593	17	17	33.8	62.846	0	97.48	4400000000	90	Q969V3-2;Q969V3	Q969V3-2;Q969V3	Nicalin	NCLN			-0.45907	0.942218		0.108831	-0.630677	-0.30335	0.748466		0.166556	-0.442126	-0.507034	1.14633		0.0767955	-0.716142	27.9865	28.2351	27.9059	27.3338	27.4261	27.9904	27.4783	28.0226	27.7165	28.162	27.4695	27.6895	27.2371	27.344	27.2188
3243	8	8	51.4	15.996	0	149.53	8651400000	143	Q8N4Q1;Q8N4Q1-2	Q8N4Q1;Q8N4Q1-2	Mitochondrial intermembrane space import and assembly protein 40	CHCHD4	Known	+	-0.458961	2.31648		0.0748862	-0.78969	0.237582	2.39557		0.167231	0.439983	0.162564	0.857174		0.450218	0.276397	28.9375	29.0134	29.0511	28.6755	28.42	28.5296	29.1947	29.2647	29.2554	27.9753	28.1436	28.0754	28.3112	28.2897	28.0811
2796	11	10	42.7	37.499	0	119.95	3943700000	117	Q5VT66;Q5VT66-2;Q5VT66-3	Q5VT66;Q5VT66-2;Q5VT66-3	Mitochondrial amidoxime-reducing component 1	2001-03-01	Known		-0.458838	2.4244		0.0734241	-0.796834	-0.45841	2.16631	+	0.03825	-0.777908	0.107171	0.374126		0.62533	0.172836	27.9054	27.6568	27.8305	27.3433	27.3054	27.3675	27.2855	27.4401	27.2919	27.8857	27.9693	27.6454	27.8039	27.978	28.04
483	9	9	39.2	36.701	0	29.938	3174500000	51	O75381-2;O75381	O75381-2;O75381	Peroxisomal membrane protein PEX14	PEX14			-0.457488	3.83955		0.066194	-0.859416	0.256646	2.55159		0.13727	0.475995	0.266171	1.43595		0.227296	0.463837	27.4989	27.4732	27.4351	27.0041	26.9699	27.0607	27.788	27.7203	27.6688	26.6544	26.6576	26.8192	NaN	27.0071	26.946
4083	3	3	4.7	83.642	0.00023641	5.1889	227500000	21	Q9BXB4;Q9BXB5-2;Q9BXB5	Q9BXB4	Oxysterol-binding protein-related protein 11	OSBPL11			-0.456299	1.70454		0.0803627	-0.734426	-0.395905	1.09351		0.0807476	-0.590702	NaN	NaN		NaN	NaN	23.7155	23.8892	24.0065	23.2564	23.4293	23.5566	23.3492	23.7689	23.3053	NaN	NaN	NaN	NaN	NaN	NaN
3161	18	18	28.8	91.079	0	61.694	2805600000	120	Q8IXB1;Q8IXB1-2;Q8IXB1-3	Q8IXB1;Q8IXB1-2	DnaJ homolog subfamily C member 10	DNAJC10			-0.456155	1.35687		0.0887149	-0.694184	0.139423	0.411982		0.505729	0.216551	-0.50307	0.268913		0.279589	-0.402918	27.435	27.4771	27.0373	26.849	26.7433	26.9886	27.4021	27.4513	27.5142	26.1408	27.0634	26.1917	27.3113	25.0705	25.5048
1307	12	10	43.1	46.302	0	75.712	1057400000	41	P31323	P31323	cAMP-dependent protein kinase type II-beta regulatory subunit	PRKAR2B			-0.455774	1.4084		0.0864644	-0.700363	-0.307279	0.353487		0.263197	-0.362051	0.493357	1.04445		0.0850612	0.68342	24.9494	25.1359	24.7392	24.6673	24.3311	24.4588	25.0579	24.2105	NaN	27.0405	27.1184	27.6297	27.6052	27.664	27.9995
3986	5	5	24.1	30.748	0	32.324	2043800000	43	Q9BT09	Q9BT09	Protein canopy homolog 3	CNPY3			-0.455577	2.04792		0.075564	-0.764567	-0.273026	1.1999		0.16012	-0.449834	0.419861	1.50893		0.0893333	0.667873	26.8804	26.8844	26.6847	26.2883	26.2943	26.5001	26.3856	26.5716	26.6733	26.9984	26.5785	26.8043	27.2319	27.132	27.2769
1051	44	44	48.7	114.76	0	323.31	45627000000	718	P16615;P16615-5;P16615-2;P16615-3;P16615-4;O14983-2;O14983;O14983-3;Q93084-4;Q93084-2;Q93084-3;Q93084-7;Q93084;Q93084-6;Q93084-5	P16615;P16615-5;P16615-2;P16615-3;P16615-4	Sarcoplasmic/endoplasmic reticulum calcium ATPase 2	ATP2A2			-0.454903	2.75855		0.0709649	-0.810664	-0.0516466	0.337327		0.801292	-0.0916967	0.207527	0.767032		0.364811	0.332284	31.3679	31.2899	31.2993	30.7994	30.8174	30.9756	31.2383	31.3797	31.1843	31.0189	30.8072	30.9407	30.9407	31.3153	31.1334
3881	8	8	10.8	127.14	0	23.819	539620000	30	Q99569-2;Q99569;Q9UQB3-2;Q9UQB3	Q99569-2;Q99569	Plakophilin-4	PKP4			-0.454296	1.26523		0.0915924	-0.679593	-0.149136	0.463247		0.470671	-0.233339	NaN	NaN		NaN	NaN	25.255	24.9234	24.9725	24.3388	24.6653	24.7839	24.8152	25.0873	24.8009	NaN	NaN	NaN	NaN	NaN	NaN
1683	5	4	9.4	71.672	0	9.1342	718690000	18	P52569;P52569-3;P52569-2	P52569;P52569-3;P52569-2	Cationic amino acid transporter 2	SLC7A2			-0.454003	2.38499		0.0749674	-0.786956	-0.973673	2.63529	+	0.008	-1.62221	NaN	NaN		NaN	NaN	26.0858	25.9846	25.8717	25.454	25.5151	25.6111	25.0883	24.9258	NaN	NaN	NaN	NaN	NaN	NaN	NaN
2190	17	17	40.5	64.732	0	101.45	10948000000	237	Q10471;Q10471-2;Q8N4A0-2;Q8N4A0	Q10471	Polypeptide N-acetylgalactosaminyltransferase 2;Polypeptide N-acetylgalactosaminyltransferase 2 soluble form	GALNT2			-0.453635	1.77609		0.0803868	-0.737983	0.162317	0.906266		0.390404	0.27814	0.027202	0.0282983		0.924782	0.0330548	29.3858	29.5399	29.2988	28.7737	29.0387	29.0512	29.4954	29.5653	29.6507	26.4404	26.7015	27.1817	27.0851	26.3265	26.9936
3859	18	18	45.3	52.118	0	131.9	7696800000	216	Q96TC7;Q96TC7-2	Q96TC7;Q96TC7-2	Regulator of microtubule dynamics protein 3	RMDN3	Known	+	-0.452898	1.3263		0.0903965	-0.686383	0.0125987	0.0260788		0.956126	0.0190334	0.300662	1.25601		0.189744	0.490992	28.9928	28.9024	28.4759	28.3264	28.3245	28.3615	28.8183	28.7476	28.843	27.9084	27.7784	28.0826	28.215	28.3487	28.1077
4137	2	2	2.3	102	0.00044033	3.7551	177150000	5	Q9BZQ6-2;Q9BZQ6	Q9BZQ6-2;Q9BZQ6	ER degradation-enhancing alpha-mannosidase-like protein 3	EDEM3			-0.452541	1.13734		0.0963194	-0.678764	-0.383008	1.35319		0.0760685	-0.605737	NaN	NaN		NaN	NaN	23.59	24.0175	23.6898	23.3173	NaN	23.3092	23.3558	23.352	23.4405	NaN	NaN	NaN	NaN	NaN	NaN
1626	14	14	50	52.891	0	94.223	1316000000	72	P50579;P50579-2;P50579-3	P50579;P50579-2;P50579-3	Methionine aminopeptidase 2	METAP2			-0.451922	0.908577		0.112577	-0.61725	-0.99191	2.42353	+	0.00872727	-1.49381	0.253172	0.609962		0.319815	0.368957	25.8641	26.0079	26.2498	25.1827	25.7996	25.7838	25.0216	25.2676	24.8569	27.0137	27.0325	27.2627	27.0298	27.5893	27.4493
2972	4	4	10.7	53.203	0	12.928	430540000	21	Q7KYR7-5;Q7KYR7;Q7KYR7-1;Q7KYR7-6;Q7KYR7-4;Q7KYR7-3;Q8WVV5-3;Q8WVV5-2;Q8WVV5	Q7KYR7-5;Q7KYR7;Q7KYR7-1;Q7KYR7-6;Q7KYR7-4;Q7KYR7-3	Butyrophilin subfamily 2 member A1	BTN2A1			-0.451675	1.60002		0.0839427	-0.717615	-0.22063	1.32531		0.225621	-0.381762	NaN	NaN		NaN	NaN	25.0367	24.7869	24.9139	24.2473	24.5465	24.5886	24.7352	24.6354	24.7049	NaN	NaN	NaN	NaN	NaN	NaN
3838	8	8	22.5	61.655	0	49.723	1201500000	41	Q96S52;Q96S52-2	Q96S52;Q96S52-2	GPI transamidase component PIG-S	PIGS			-0.450174	2.1935		0.0757459	-0.768012	-0.00584539	0.0225978		0.974992	-0.00996855	NaN	NaN		NaN	NaN	26.4506	26.3993	26.299	25.8662	25.8521	26.0801	26.2884	26.5241	26.3188	NaN	NaN	NaN	NaN	NaN	NaN
3904	6	6	22.1	34.746	0	26.223	812640000	50	Q99747;Q99747-2	Q99747;Q99747-2	Gamma-soluble NSF attachment protein	NAPG	Known		-0.449947	1.58652		0.084819	-0.713986	-0.163932	0.506365		0.431496	-0.255475	0.0221507	0.0250993		0.934312	0.0278451	25.5725	25.6048	25.8337	25.1136	25.1254	25.4222	25.3818	25.7369	25.4005	24.92	24.8525	25.7233	25.0399	25.1568	25.3657
3068	16	16	39.7	63.836	0	117.73	6766100000	165	Q86UE4	Q86UE4	Protein LYRIC	MTDH			-0.449785	1.52804		0.0867859	-0.707349	-0.222825	1.29361		0.223217	-0.383691	0.301047	1.13596		0.19832	0.481959	28.935	28.7487	28.6654	28.2567	28.1928	28.5502	28.5743	28.5344	28.5718	27.6838	27.3839	27.4321	27.6351	27.8902	27.8776
2134	10	10	33.5	59.173	0	56.462	1301000000	50	Q05932-3;Q05932-2;Q05932-4;Q05932	Q05932-3;Q05932-2;Q05932-4;Q05932	Folylpolyglutamate synthase, mitochondrial	FPGS	Known	+	-0.449385	2.63762		0.0752716	-0.795298	-0.294663	2.63507		0.0985243	-0.542935	0.312998	0.834638		0.214517	0.464426	25.9598	26.0813	26.0608	25.6905	25.5382	25.5249	25.7538	25.765	25.699	26.0056	26.4383	26.5612	26.6942	26.6882	26.5618
3518	7	7	20.3	43.089	0	20.721	698220000	22	Q92604	Q92604	Acyl-CoA:lysophosphatidylglycerol acyltransferase 1	LPGAT1			-0.448631	1.42086		0.0892551	-0.693421	-0.00377337	0.014643		0.982393	-0.00644664	NaN	NaN		NaN	NaN	25.6389	25.5074	25.4704	24.8147	25.2229	25.2332	25.5656	25.6353	25.4046	NaN	NaN	NaN	NaN	NaN	NaN
4156	8	8	29.6	47.094	0	32.571	1266000000	46	Q9C0E8-2;Q9C0E8;Q9C0E8-3;Q9C0E8-4	Q9C0E8-2;Q9C0E8;Q9C0E8-3;Q9C0E8-4	Protein lunapark	LNP			-0.447869	1.93019		0.0787907	-0.744065	0.0324097	0.0884649		0.892601	0.0514259	0.145704	0.537018		0.512645	0.235123	26.0805	26.0906	25.8745	25.615	25.6642	25.4227	26.0485	26.2369	25.8574	26.4817	26.4058	26.4081	26.3439	26.6813	26.7074
3858	28	28	54.8	75.981	0	223.65	19622000000	278	Q96TA2-3;Q96TA2-2;Q96TA2	Q96TA2-3;Q96TA2-2;Q96TA2	ATP-dependent zinc metalloprotease YME1L1	YME1L1	Known	+	-0.447249	3.46748		0.0692838	-0.829277	0.0889352	1.10774		0.627322	0.165383	-0.0496839	0.254015		0.808423	-0.0860078	30.1062	30.0359	30.1632	29.6822	29.6412	29.6401	30.191	30.176	30.2051	29.6694	29.65	29.6695	29.696	29.6851	29.4586
4184	11	11	19.8	75.225	0	14.816	2500100000	26	Q9H089	Q9H089	Large subunit GTPase 1 homolog	LSG1			-0.446032	0.842652		0.123193	-0.59813	-0.0371272	0.110212		0.875551	-0.0597003	1.13209	1.61915	+	0.03692	1.38078	26.671	26.5037	26.4044	26.2576	26.3651	25.6184	26.6211	26.539	26.3076	27.9356	27.6822	27.7693	29.2215	28.3058	29.256
1021	5	5	17	39.304	0	43.152	1199400000	49	P15151-3;P15151-2;P15151-4;P15151	P15151-3;P15151-2;P15151-4;P15151	Poliovirus receptor	PVR			-0.44585	0.655349		0.146879	-0.551888	-0.165817	0.212463		0.532148	-0.206542	NaN	NaN		NaN	NaN	25.9283	25.5626	25.5339	24.8793	25.0242	25.7838	25.2257	26.0589	25.2428	NaN	26.5154	NaN	26.8836	27.5015	27.7283
2802	12	12	30.1	65.111	0	31.299	1640000000	38	Q5VV42;Q5VV42-2;Q5VV42-3	Q5VV42;Q5VV42-2	Threonylcarbamoyladenosine tRNA methylthiotransferase	CDKAL1			-0.444401	2.4688		0.0742955	-0.777702	-0.55294	2.44258	+	0.0251803	-0.936643	NaN	NaN		NaN	NaN	27.0706	27.0308	26.8741	26.4874	26.5351	26.6199	26.3085	26.5347	26.4735	NaN	NaN	NaN	NaN	NaN	NaN
1522	14	13	20.4	80.529	0	35.23	9476600000	119	P46977;P46977-2	P46977;P46977-2	Dolichyl-diphosphooligosaccharide--protein glycosyltransferase subunit STT3A	STT3A			-0.44269	2.18171		0.0781538	-0.756258	-0.127182	1.64146		0.464508	-0.237562	-0.0193857	0.0423029		0.930481	-0.0295445	29.2904	29.1962	29.2727	28.744	28.7169	28.9703	29.1251	29.1616	29.091	27.9048	27.6568	27.8924	27.6311	28.0628	27.7019
2967	11	11	17.4	80.467	0	22.75	1193800000	56	Q71RC2-3;Q71RC2;Q71RC2-4;Q71RC2-2;Q71RC2-6;Q71RC2-5;Q71RC2-7	Q71RC2-3;Q71RC2;Q71RC2-4;Q71RC2-2;Q71RC2-6;Q71RC2-5;Q71RC2-7	La-related protein 4	LARP4			-0.442554	1.74447		0.0836916	-0.720318	-1.15512	3.77077	+	0.013	-1.97466	NaN	NaN		NaN	NaN	25.8843	25.9478	26.1627	25.4133	25.5744	25.6794	24.865	24.8345	24.8299	NaN	NaN	NaN	NaN	NaN	NaN
3242	6	6	20.7	40.14	0	26.381	1337400000	39	Q8N4Q0;Q8N4Q0-2	Q8N4Q0;Q8N4Q0-2	Zinc-binding alcohol dehydrogenase domain-containing protein 2	ZADH2	Predicted	+	-0.442303	2.35046		0.0761433	-0.767117	-0.268199	1.718		0.141102	-0.470012	0.396678	0.359523		0.269605	0.41327	26.1796	26.3031	26.2966	25.8934	25.6877	25.8713	25.956	25.9136	26.1052	25.4905	26.4175	25.6564	25.5412	26.7148	26.4984
4191	5	5	24.5	30.281	0	14.561	455620000	27	Q9H0E2;Q9H0E2-2	Q9H0E2;Q9H0E2-2	Toll-interacting protein	TOLLIP			-0.44205	1.11233		0.102702	-0.643559	-0.727593	1.70076	+	0.0244122	-1.10243	-0.0343672	0.305155		0.858856	-0.06296	24.6953	24.5432	24.7746	23.9215	24.2411	24.5243	23.7639	24.123	NaN	25.6499	25.6772	25.6013	25.5997	25.6819	25.5437
2946	22	22	42.6	77.528	0	79.402	5781300000	151	Q6ZRP7	Q6ZRP7	Sulfhydryl oxidase 2	QSOX2			-0.441916	2.17038		0.0779947	-0.75432	0.391835	0.307704		0.221959	0.384481	0.500525	0.256484		0.293066	0.39229	28.0351	28.1066	28.0001	27.4589	27.623	27.7341	27.839	29.4709	28.0073	27.0607	27.227	28.1973	28.0474	29.1643	26.7749
3579	6	3	40.5	19.815	0	10.707	434470000	28	Q93096	Q93096	Protein tyrosine phosphatase type IVA 1	PTP4A1			-0.44035	0.583377		0.161063	-0.526313	-1.43107	2.14191	+	0.0108837	-1.82726	0.225039	0.160682		0.540274	0.219359	24.7422	24.274	24.3478	23.7903	23.6375	24.6152	22.8442	23.5045	22.7221	25.2473	25.9854	25.9284	25.0128	26.5051	26.3184
2710	2	2	12.4	32.824	0	11.837	643410000	22	Q5BJH7-6;Q5BJH7-3;Q5BJH7;Q5BJH7-2;Q5BJH7-4;Q5BJH7-5	Q5BJH7-6;Q5BJH7-3;Q5BJH7;Q5BJH7-2;Q5BJH7-4;Q5BJH7-5	Protein YIF1B	YIF1B	Predicted		-0.440264	1.21156		0.0968095	-0.676585	NaN	NaN		NaN	NaN	NaN	NaN		NaN	NaN	25.8614	25.5438	25.8087	NaN	25.1886	25.4068	NaN	25.8034	NaN	NaN	NaN	NaN	NaN	NaN	NaN
1753	3	3	11.9	40.165	0.00023918	5.426	781740000	8	P55082;P55082-2;O75121-2;O75121	P55082;P55082-2	Microfibril-associated glycoprotein 3	MFAP3			-0.439432	1.21811		0.097002	-0.676595	NaN	NaN		NaN	NaN	NaN	NaN		NaN	NaN	24.9357	24.9315	25.2695	24.5552	24.6571	NaN	24.0609	NaN	NaN	NaN	NaN	NaN	NaN	NaN	NaN
4450	5	5	30.5	24.955	0	21.991	462770000	28	Q9NQX7-2;Q9NQX7;Q9NQX7-3	Q9NQX7-2;Q9NQX7;Q9NQX7-3	Integral membrane protein 2C;CT-BRI3	ITM2C			-0.437757	3.32225		0.07147	-0.807754	-1.17678	3.6876	+	0.0133714	-1.99152	NaN	NaN		NaN	NaN	24.9719	25.0399	24.9024	24.5606	24.523	24.5173	23.7105	23.7153	23.9582	NaN	NaN	NaN	NaN	NaN	NaN
2014	2	2	2.5	122.84	0	7.8907	124400000	8	P82094;P82094-2	P82094;P82094-2	TATA element modulatory factor	TMF1			-0.437093	2.87878		0.0747456	-0.813693	-0.455128	2.36503	+	0.0363901	-0.815612	NaN	NaN		NaN	NaN	23.3039	23.3404	23.2717	22.8321	22.9043	NaN	NaN	22.92	22.7804	NaN	NaN	NaN	NaN	NaN	NaN
1591	7	7	35.2	24.976	0	87.598	11578000000	166	P49755	P49755	Transmembrane emp24 domain-containing protein 10	TMED10			-0.433965	1.62121		0.0876986	-0.697198	-0.178373	0.781695		0.361647	-0.294718	0.035792	0.171085		0.861623	0.0618056	29.5268	29.5415	29.4522	28.8634	29.0788	29.2765	29.1293	29.4624	29.3937	28.1852	28.1646	28.3849	28.2819	28.3431	28.217
615	10	10	45.2	28.612	0	51.349	3504000000	99	O95249;O95249-2	O95249;O95249-2	Golgi SNAP receptor complex member 1	GOSR1			-0.433159	1.91899		0.0836	-0.72275	-0.403178	1.39973		0.0670411	-0.635655	0.146004	0.483		0.517766	0.231232	27.9926	27.7303	27.7849	27.3101	27.3859	27.5123	27.2397	27.6128	27.4458	26.6494	26.5603	26.7593	26.7002	27.0379	26.6688
4532	2	2	9.8	36.389	0	10.216	419800000	6	Q9NV92	Q9NV92	NEDD4 family-interacting protein 2	NDFIP2			-0.433137	1.95273		0.084297	-0.725414	NaN	NaN		NaN	NaN	NaN	NaN		NaN	NaN	25.3584	25.6634	25.423	25.0143	25.026	25.1052	NaN	NaN	NaN	NaN	NaN	NaN	NaN	NaN	NaN
2365	59	59	39.7	218.52	0	291.23	6764800000	272	Q14008-2;Q14008;Q14008-3	Q14008-2;Q14008;Q14008-3	Cytoskeleton-associated protein 5	CKAP5			-0.433136	0.593152		0.162351	-0.524127	-0.650517	1.26046	+	0.0295163	-0.876465	0.483554	2.46919		0.0571444	0.837031	27.1409	27.5149	27.024	26.2162	27.0196	27.1446	26.2503	26.914	26.5639	29.9752	30.1323	30.1684	30.5051	30.5486	30.6727
2754	8	8	24.9	51.103	0	23.961	506750000	24	Q5SWX8;Q5SWX8-4;Q5SWX8-3;Q5SWX8-2	Q5SWX8;Q5SWX8-4;Q5SWX8-3;Q5SWX8-2	Protein odr-4 homolog	ODR4			-0.433094	2.11043		0.0810051	-0.762816	-0.168534	1.27831		0.353001	-0.299971	NaN	NaN		NaN	NaN	24.7657	24.6877	24.5907	24.2243	24.2722	NaN	24.5054	24.5777	24.4554	NaN	NaN	NaN	NaN	NaN	NaN
1839	14	7	74.5	23.545	0	141.74	7510200000	159	P61019;P61019-2	P61019;P61019-2	Ras-related protein Rab-2A	RAB2A			-0.432471	2.09996		0.0805657	-0.735562	-0.118945	0.559621		0.547558	-0.200148	0.36749	1.37982		0.124823	0.58864	28.8209	28.8052	28.7598	28.1916	28.4625	28.4345	28.5209	28.8409	28.6673	28.5634	28.5063	28.6978	28.7355	29.0624	29.072
261	10	10	23.5	62.924	0	39.909	886150000	41	O15270	O15270	Serine palmitoyltransferase 2	SPTLC2	Predicted	+	-0.431192	1.20626		0.101839	-0.645505	-0.167853	0.637786		0.402395	-0.271296	-0.00736554	0.0185304		0.9629	-0.0116513	25.5729	25.6652	25.3067	24.8282	25.1794	25.2437	25.264	25.4383	25.339	25.8839	25.7552	25.7608	25.5695	26.003	25.8053
438	5	5	38.5	16.368	0	12.827	1700200000	40	O60869;O60869-2;O60869-3	O60869;O60869-2;O60869-3	Endothelial differentiation-related factor 1	EDF1			-0.430774	1.74648		0.086993	-0.704815	-0.611428	2.19505	+	0.0236636	-0.991132	0.356209	0.756748		0.185223	0.497225	25.8397	25.8666	25.6534	25.238	25.2998	25.5296	25.1131	25.0492	25.3631	27.8272	27.6815	27.7774	27.7014	28.3952	28.2581
4007	15	15	52.2	44.875	0	124.36	9026400000	192	Q9BTV4	Q9BTV4	Transmembrane protein 43	TMEM43			-0.430234	1.36728		0.0953115	-0.665	-0.0409889	0.479721		0.839331	-0.0763137	0.393059	1.23294		0.114968	0.604956	29.0526	28.975	29.0077	28.3408	28.561	28.8427	28.9622	29.0256	28.9245	28.5224	28.113	28.4484	28.659	28.9153	28.6886
3297	5	5	46.5	18.054	0	23.346	555080000	26	Q8NBM4-4;Q8NBM4-3;Q8NBM4-2;Q8NBM4	Q8NBM4-4;Q8NBM4-3;Q8NBM4-2;Q8NBM4	Ubiquitin-associated domain-containing protein 2	UBAC2			-0.429547	1.48278		0.0924884	-0.677269	-0.157873	0.541725		0.439428	-0.251104	NaN	NaN		NaN	NaN	25.3964	25.1083	25.1516	24.617	24.7877	24.963	25.0952	25.2008	24.8867	NaN	NaN	NaN	NaN	NaN	NaN
2275	26	16	48.3	69.578	0	70.706	3467900000	101	Q13310-2;Q13310;Q13310-3;P0CB38	Q13310-2;Q13310;Q13310-3	Polyadenylate-binding protein 4	PABPC4			-0.429234	1.46812		0.0930438	-0.675285	-1.11898	3.20804	+	0.0104	-1.82023	0.112796	0.295336		0.626418	0.172258	27.3992	27.4288	27.3061	26.7072	26.9842	27.1551	26.1432	26.1579	26.4762	28.8883	28.7936	28.5836	28.7128	29.1173	28.7737
2250	6	6	13.6	55.188	0	15.859	2256700000	38	Q13137-4;Q13137-5;Q13137;Q13137-3;Q13137-2	Q13137-4;Q13137-5;Q13137;Q13137-3;Q13137-2	Calcium-binding and coiled-coil domain-containing protein 2	CALCOCO2			-0.429147	2.67671		0.0759781	-0.765447	-0.482635	0.537361		0.100535	-0.5385	NaN	NaN		NaN	NaN	27.1924	27.2716	27.294	26.8682	26.7194	26.8829	27.5	26.667	26.1431	NaN	NaN	NaN	NaN	NaN	NaN
1468	6	3	41.7	9.461	0	25.49	1845000000	24	P42677	P42677	40S ribosomal protein S27	RPS27			-0.428824	1.62178		0.090306	-0.690604	-0.645854	2.21289	+	0.0243899	-1.03823	NaN	NaN		NaN	NaN	24.1943	24.3018	24.0104	23.5716	23.8541	23.7944	23.381	23.6827	23.5052	NaN	NaN	NaN	NaN	NaN	NaN
2832	10	10	11.7	120.18	0	31.451	775630000	36	Q69YQ0-2;Q69YQ0	Q69YQ0-2;Q69YQ0	Cytospin-A	SPECC1L			-0.428381	1.7721		0.0861894	-0.703866	-0.654515	2.46984	+	0.025563	-1.08161	NaN	NaN		NaN	NaN	25.3754	25.152	25.5047	24.9319	24.9655	24.8496	24.7248	24.6522	24.6917	NaN	NaN	NaN	NaN	NaN	NaN
947	50	50	58.8	129.63	0	323.31	20196000000	530	P11498;P11498-2	P11498	Pyruvate carboxylase, mitochondrial	PC	Known		-0.427717	3.81891		0.0715472	-0.806118	0.192185	2.24276		0.2556	0.358799	-0.165988	3.47028		0.38012	-0.322575	29.6145	29.7031	29.6401	29.2551	29.2033	29.2163	29.8053	29.8882	29.8408	31.1895	31.2171	31.1873	31.0381	31.0472	31.0106
3504	18	18	12.9	206.01	0	33.887	1924400000	58	Q92538-3;Q92538-2;Q92538	Q92538-3;Q92538-2;Q92538	Golgi-specific brefeldin A-resistance guanine nucleotide exchange factor 1	GBF1			-0.427302	1.24918		0.102166	-0.64685	-0.449472	1.361		0.0565133	-0.686948	-0.348715	0.390317		0.285674	-0.397722	26.7105	26.7246	26.7704	25.9898	26.4451	26.4888	25.9815	26.4699	26.4057	26.9375	26.9884	26.2028	26.8913	26.2426	25.9486
4062	10	10	24.4	69.799	0	33.755	324320000	25	Q9BW27-3;Q9BW27;Q9BW27-2	Q9BW27-3;Q9BW27;Q9BW27-2	Nuclear pore complex protein Nup85	NUP85			-0.426054	0.572228		0.174733	-0.523471	0.318132	0.445547		0.21596	0.400657	NaN	NaN		NaN	NaN	23.4035	NaN	23.4345	22.5419	23.3751	23.0618	23.5659	24.188	23.4576	NaN	NaN	NaN	NaN	NaN	NaN
3455	8	8	20.2	59.356	0	34.5	2220400000	28	Q8WVX9	Q8WVX9	Fatty acyl-CoA reductase 1	FAR1			-0.425441	0.387833		0.23337	-0.442153	-0.414091	1.01048		0.0778894	-0.598136	NaN	NaN		NaN	NaN	27.4526	27.2157	26.8838	25.8951	27.1995	27.1812	26.9663	26.6514	26.6922	25.4694	26.9811	25.676	NaN	NaN	25.8084
1225	11	11	43.8	40.633	0	114.98	2038600000	71	P26992	P26992	Ciliary neurotrophic factor receptor subunit alpha	CNTFR			-0.42533	1.50864		0.0933	-0.674743	0.937459	0.465352		0.0574839	0.683664	1.14234	2.51866	+	0.0558824	1.68489	20.4919	20.3671	20.3251	19.7436	20.1546	20.0099	20.5	23.0712	20.4252	28.2948	28.5281	28.5	29.8651	29.5812	29.3036
1488	8	8	17.9	68.019	0	24.553	474630000	35	P43378	P43378	Tyrosine-protein phosphatase non-receptor type 9	PTPN9			-0.425028	1.39532		0.0956929	-0.662001	-0.0547708	0.387673		0.78675	-0.0978881	0.086985	0.207174		0.714025	0.132165	24.6608	24.6401	24.554	24.1113	24.0057	24.4629	24.6445	24.5732	24.473	NaN	25.2461	24.8322	25.1444	25.161	25.0729
1017	30	25	55.2	81.744	0	140.74	10332000000	247	P14923	P14923	Junction plakoglobin	JUP			-0.423748	1.36277		0.0966178	-0.656699	0.174314	0.857492		0.364453	0.293214	0.0339165	0.0627994		0.890353	0.0493213	29.2901	29.1531	29.0801	28.5656	28.6812	29.0052	29.3307	29.481	29.2346	27.9887	28.2311	28.4923	28.0778	28.4869	28.2492
1487	7	7	42.3	32.235	0	47.38	7602400000	124	P43307;P43307-2	P43307;P43307-2	Translocon-associated protein subunit alpha	SSR1			-0.423455	2.13675		0.0840889	-0.725003	-0.19265	1.01636		0.304944	-0.327099	0.152418	0.346305		0.532828	0.223338	29.0435	28.881	28.9546	28.4075	28.5542	28.647	28.6891	28.9181	28.6939	27.3361	27.2511	27.511	27.1921	27.7305	27.6329
5015	6	6	33.2	26.005	0	11.977	2125300000	30	Q9Y3A6;Q9Y3A6-2	Q9Y3A6;Q9Y3A6-2	Transmembrane emp24 domain-containing protein 5	TMED5			-0.422158	2.06942		0.0837314	-0.718464	-0.375628	2.011		0.0635	-0.646528	NaN	NaN		NaN	NaN	27.2977	27.2978	27.2904	26.7087	26.9031	27.0075	26.7889	27.0678	26.9023	NaN	NaN	NaN	NaN	NaN	NaN
4405	20	20	22.9	121.72	0	54.802	3330800000	92	Q9NNW5	Q9NNW5	WD repeat-containing protein 6	WDR6			-0.420776	1.93164		0.0868852	-0.706399	-1.00717	3.35208	+	0.00821053	-1.69326	NaN	NaN		NaN	NaN	28.1946	28.1715	27.9648	27.5842	27.6862	27.7981	27.1778	27.1481	26.9835	NaN	NaN	NaN	NaN	NaN	NaN
3735	19	18	54.5	54.392	0	126.97	11466000000	197	Q96HE7	Q96HE7	ERO1-like protein alpha	ERO1L			-0.420336	2.49558		0.0791465	-0.742065	-0.0727997	0.868577		0.698892	-0.135065	-0.261771	1.16374		0.248578	-0.432127	29.4938	29.4719	29.418	28.9388	29.0296	29.1544	29.3264	29.4319	29.4071	28.4546	28.395	28.3422	27.9647	28.3132	28.1285
3869	8	8	43.6	23.026	0	137.54	1818400000	80	Q99470	Q99470	Stromal cell-derived factor 2	SDF2			-0.420151	1.98645		0.0863318	-0.709616	0.119982	0.774598		0.523205	0.20999	0.37262	0.71337		0.178718	0.504454	26.5221	26.3402	26.4296	25.9035	25.9715	26.1566	26.491	26.6464	26.5146	26.4218	26.6484	27.101	26.8698	27.0964	27.3228
2508	16	16	69.5	38.89	0	231.31	29162000000	293	Q15293;Q15293-2	Q15293;Q15293-2	Reticulocalbin-1	RCN1			-0.419453	1.55568		0.0939751	-0.672045	-0.153536	1.07926		0.40275	-0.270846	1.07447	0.220667		0.233577	0.457741	31.0362	30.9062	30.9823	30.4042	30.4735	30.7886	30.7505	30.9302	30.7834	26.3078	25.6093	25.8641	NaN	24.5484	29.4547
5043	9	8	16	98.081	0	24.89	895020000	32	Q9Y487	Q9Y487	V-type proton ATPase 116 kDa subunit a isoform 2	ATP6V0A2			-0.418226	1.79599		0.0896054	-0.69209	-0.641333	2.54037	+	0.025122	-1.1229	NaN	NaN		NaN	NaN	25.887	25.9354	25.7709	25.5195	25.2631	25.556	25.1788	NaN	25.2674	NaN	NaN	NaN	NaN	NaN	NaN
3584	2	2	12.4	30.288	0	9.0486	510050000	9	Q969M1-2;Q969M1	Q969M1-2;Q969M1	Mitochondrial import receptor subunit TOM40B	TOMM40L	Known	+	-0.417784	2.3186		0.0835711	-0.728089	0.179258	0.568407		0.386562	0.28001	NaN	NaN		NaN	NaN	24.8216	24.8122	25.0078	24.4961	24.3882	24.5038	24.9514	24.919	25.3088	NaN	NaN	NaN	NaN	NaN	NaN
4417	4	4	17.2	32.407	0.0002442	5.9442	358220000	11	Q9NPE2	Q9NPE2	Neugrin	NGRN	Known	+	-0.4168	1.83103		0.0892973	-0.692979	-0.476334	1.89613	+	0.037845	-0.779699	NaN	NaN		NaN	NaN	24.6132	24.8815	24.6142	24.281	24.2054	24.3721	24.1762	24.1465	24.3571	NaN	NaN	NaN	NaN	NaN	NaN
2775	4	4	10.1	62.551	0	9.9534	689580000	11	Q5T9L3-2;Q5T9L3;Q5T9L3-3	Q5T9L3-2;Q5T9L3	Protein wntless homolog	WLS			-0.415035	1.36468		0.101382	-0.646403	-0.201581	0.437234		0.37601	-0.292373	NaN	NaN		NaN	NaN	25.8114	25.8151	25.5438	25.0942	25.3714	25.4596	NaN	25.7229	25.3208	NaN	NaN	NaN	NaN	NaN	NaN
4238	17	17	57.2	37.92	0	323.31	18509000000	239	Q9H2U2;Q9H2U2-2;Q9H2U2-3;Q9H2U2-6;Q9H2U2-4	Q9H2U2;Q9H2U2-2;Q9H2U2-3;Q9H2U2-6	Inorganic pyrophosphatase 2, mitochondrial	PPA2	Known	+	-0.414928	3.91124		0.074088	-0.78568	0.174397	2.15064		0.305935	0.326394	-0.0924575	0.548117		0.650058	-0.160902	29.8402	29.9341	29.8926	29.4775	29.4601	29.4845	30.0379	30.105	30.0472	30.1643	30.0479	30.0233	30.1073	29.9214	29.9295
4078	14	14	55.5	44.94	0	73.44	2557000000	79	Q9BWS9;Q9BWS9-2;Q9BWS9-3	Q9BWS9;Q9BWS9-2;Q9BWS9-3	Chitinase domain-containing protein 1	CHID1			-0.41486	2.0592		0.0865822	-0.707169	0.0183811	0.143333		0.924017	0.0335683	0.336149	0.856724		0.188433	0.492617	27.1637	27.3237	27.2281	26.7309	26.7719	26.9679	27.259	27.2382	27.2733	26.9984	26.775	26.649	26.8501	27.2282	27.3526
4839	4	4	8.4	79.579	0	14.223	415950000	24	Q9UKM7	Q9UKM7	Endoplasmic reticulum mannosyl-oligosaccharide 1,2-alpha-mannosidase	MAN1B1			-0.41474	1.89317		0.0885909	-0.694973	-0.0652288	0.297835		0.758032	-0.110768	NaN	NaN		NaN	NaN	24.8032	24.8047	24.8059	24.2737	24.3139	24.582	24.6432	24.9169	24.6581	NaN	NaN	NaN	NaN	NaN	NaN
900	27	14	53.7	70.051	0	323.31	67558000000	544	P0DMV9;P0DMV8;P0DMV8-2	P0DMV9;P0DMV8;P0DMV8-2	Heat shock 70 kDa protein 1B;Heat shock 70 kDa protein 1A	HSPA1B;HSPA1A	Known		-0.413484	1.31788		0.10512	-0.639165	-0.57534	2.40872	+	0.0249006	-0.965302	0.378934	1.45123		0.112496	0.609917	32.2907	32.1803	32.2373	31.5367	31.9461	31.9851	31.5266	31.8333	31.6225	29.9119	29.805	29.8624	30.0547	30.4567	30.2048
2363	16	16	32.6	75.643	0	49.098	1710800000	48	Q13948-10;Q13948;Q13948-2;P39880-9;P39880-3;Q13948-9;P39880-6;P39880-4;P39880-5;P39880-2;P39880	Q13948-10;Q13948;Q13948-2;P39880-9;P39880-3;Q13948-9;P39880-6;P39880-4;P39880-5;P39880-2;P39880	Protein CASP;Homeobox protein cut-like 1	CUX1			-0.412487	2.51796		0.0819348	-0.730973	-0.461167	1.35261		0.0536012	-0.699402	0.34824	1.0093		0.162099	0.526118	26.4762	26.5434	26.5895	26.0384	26.1061	26.2273	25.7772	26.1447	26.3038	26.7541	26.627	26.8239	26.7917	27.1587	27.2992
1000	4	4	45.4	18.848	0	33.65	860050000	25	P14209;P14209-3;P14209-2	P14209;P14209-3;P14209-2	CD99 antigen	CD99			-0.411704	0.135529		0.514161	-0.254047	-0.0027256	0.00101843		0.992425	-0.00198552	NaN	NaN		NaN	NaN	26.6144	24.8684	24.9798	23.4149	25.0445	26.7681	24.5889	26.7857	25.0797	NaN	NaN	NaN	NaN	NaN	NaN
2588	12	8	58.1	47.82	0	91.012	1248700000	55	Q16576;Q16576-2	Q16576;Q16576-2	Histone-binding protein RBBP7	RBBP7			-0.411387	2.16441		0.0859245	-0.709013	-0.0129821	0.0311108		0.95329	-0.0202656	0.533275	0.758047		0.0960566	0.647602	25.9864	25.8969	26.0338	25.4362	25.5705	25.6762	25.8631	26.2255	25.7895	26.7448	26.6814	26.4127	26.7666	27.754	26.918
680	12	12	29.7	52.259	0	35.75	4688600000	128	O95864;O95864-3;O95864-4;O95864-2	O95864;O95864-3;O95864-4;O95864-2	Fatty acid desaturase 2	FADS2			-0.410547	1.79254		0.0910835	-0.681266	-0.712613	3.28272	+	0.0164286	-1.25042	-0.0826391	0.321408		0.698033	-0.136489	28.3261	28.1454	28.1703	27.7677	27.6761	27.9663	27.4531	27.583	27.4678	27.8739	27.7518	27.9509	27.7067	27.9512	27.6708
1654	13	13	29.5	54.847	0	38.441	7187700000	96	P51648;P51648-2;P48448;P43353-2;P30838;P43353	P51648;P51648-2	Fatty aldehyde dehydrogenase	ALDH3A2	Known	+	-0.409809	1.65542		0.0947216	-0.668732	-0.0906862	0.326443		0.669274	-0.14765	0.360048	1.11547		0.143444	0.552398	28.8251	28.9801	28.6015	28.3929	28.3479	28.4364	28.6588	28.7664	28.7094	27.2214	27.0555	27.2818	27.421	27.8178	27.4
4015	7	7	54.9	20.35	0	95.457	10032000000	100	Q9BU61;Q9BU61-2	Q9BU61;Q9BU61-2	NADH dehydrogenase [ubiquinone] 1 alpha subcomplex assembly factor 3	NDUFAF3	Known	+	-0.409803	0.841542		0.13968	-0.564447	0.140624	0.797127		0.457697	0.241829	-0.339261	1.29533		0.149256	-0.544772	29.0575	29.21	29.0277	28.2509	28.9076	28.9073	29.2023	29.3541	29.1607	28.9827	28.8651	28.7151	28.6061	28.3246	28.6145
1137	130	117	68.4	280.01	0	323.31	129490000000	2199	P21333-2;P21333	P21333-2;P21333	Filamin-A	FLNA			-0.408689	1.0591		0.122885	-0.599837	-0.205645	1.29738		0.256455	-0.358088	0.119138	0.424867		0.588178	0.192248	32.7126	32.6451	32.7426	31.9559	32.3507	32.5676	32.4223	32.6313	32.4297	33.1595	33.3363	33.4175	33.2549	33.5731	33.4427
35	4	4	18.8	38.484	0	12.533	861890000	25	B7ZAQ6-2;B7ZAQ6-3;P0CG08;B7ZAQ6	B7ZAQ6-2;B7ZAQ6-3;P0CG08;B7ZAQ6	Golgi pH regulator A;Golgi pH regulator B	GPR89A;GPR89B			-0.408654	1.47785		0.0994844	-0.650534	-0.0877921	0.465992		0.66394	-0.150977	NaN	NaN		NaN	NaN	25.9078	25.9425	25.7795	25.2522	25.4921	25.6595	25.6598	25.861	25.8457	NaN	NaN	NaN	NaN	NaN	NaN
1092	9	9	47.3	21.397	0	50.979	16924000000	282	P18621;P18621-3;P18621-2	P18621;P18621-3;P18621-2	60S ribosomal protein L17	RPL17			-0.408016	1.38572		0.105313	-0.640149	-0.739244	2.1641	+	0.0251717	-1.14756	0.504968	2.45366		0.0530887	0.86774	29.9497	29.9181	29.735	29.2208	29.5589	29.5991	29.0274	29.382	28.9756	30.3872	30.2614	30.3513	30.693	30.9217	30.9001
3356	9	9	22.2	59.745	0	25.647	882660000	27	Q8NHP6;Q8NHP6-2	Q8NHP6;Q8NHP6-2	Motile sperm domain-containing protein 2	MOSPD2			-0.408009	1.16632		0.113786	-0.614013	-0.060435	0.49308		0.761495	-0.109199	NaN	NaN		NaN	NaN	25.8591	25.881	25.7386	25.258	25.2616	25.7351	25.7176	25.7592	25.8206	NaN	NaN	NaN	NaN	NaN	NaN
1795	9	9	33.6	27.978	0	25.164	6138000000	93	P57088	P57088	Transmembrane protein 33	TMEM33			-0.406876	1.22949		0.113002	-0.620763	-0.100644	0.245113		0.662443	-0.151968	0.359842	0.97872		0.154507	0.535236	28.369	28.5826	28.1524	28.1177	27.7943	27.9713	28.3229	28.414	28.0652	28.5701	28.2457	28.53	28.5319	28.9669	28.9266
1600	4	4	11	50.011	0	11.712	699240000	28	P49810-3;P49810;P49810-2;P49768-6;P49768-2;P49768;P49768-3;P49768-5;P49768-7	P49810-3;P49810;P49810-2;P49768-6;P49768-2;P49768	Presenilin-2;Presenilin-2 NTF subunit;Presenilin-2 CTF subunit;Presenilin-1;Presenilin-1 NTF subunit;Presenilin-1 CTF subunit;Presenilin-1 CTF12	PSEN2;PSEN1	Known		-0.406584	1.07372		0.122463	-0.599688	-0.472187	1.18564		0.0565968	-0.687092	NaN	NaN		NaN	NaN	25.2611	25.1637	25.5109	24.6536	24.9068	25.1555	24.5374	25.0584	24.9232	25.7701	27.2258	NaN	NaN	26.2206	NaN
883	4	4	21.2	32.818	0	13.654	496320000	13	P09601	P09601	Heme oxygenase 1	HMOX1			-0.406027	1.02273		0.128776	-0.607479	-0.287075	0.878517		0.167094	-0.440185	NaN	NaN		NaN	NaN	25.2658	25.4429	25.0673	NaN	24.7272	24.9781	24.8298	24.9043	25.1806	NaN	NaN	NaN	NaN	NaN	NaN
3173	4	4	19.9	30.549	0	17.234	1558700000	36	Q8IY95-2;Q8IY95	Q8IY95-2;Q8IY95	Transmembrane protein 192	TMEM192			-0.405099	3.62139		0.0764636	-0.760706	-0.0889454	0.672792		0.647808	-0.158828	NaN	NaN		NaN	NaN	26.723	26.6214	26.6805	26.2804	26.2866	26.2426	26.4848	26.6592	26.614	NaN	26.5097	NaN	NaN	NaN	NaN
980	2	2	8.7	21.012	0.00022267	3.9243	257970000	18	P13498	P13498	Cytochrome b-245 light chain	CYBA			-0.404654	1.43147		0.105068	-0.640786	0.257626	0.803961		0.209282	0.397473	NaN	NaN		NaN	NaN	23.7918	24.2229	23.9979	23.5223	23.6682	23.6081	24.1947	24.4218	24.169	NaN	NaN	NaN	NaN	NaN	NaN
986	20	20	48.9	61.049	0	74.073	7435400000	174	P13674;P13674-2;P13674-3	P13674;P13674-2;P13674-3	Prolyl 4-hydroxylase subunit alpha-1	P4HA1	Predicted		-0.403649	1.62037		0.0971952	-0.657455	-0.433905	2.07941	+	0.0474483	-0.73614	0.561895	0.961512		0.0740608	0.7263	29.1385	29.052	29.0715	28.5754	28.5702	28.9055	28.5638	28.8244	28.5721	25.8835	25.3443	26.0569	26.0535	26.637	26.2799
3283	8	8	29.9	36.167	0	17.997	709860000	50	Q8N9F7;Q8N9F7-3;Q8N9F7-2	Q8N9F7;Q8N9F7-3;Q8N9F7-2	Glycerophosphodiester phosphodiesterase domain-containing protein 1	GDPD1	Predicted		-0.40303	2.68501		0.0839115	-0.724003	-0.150306	1.65371		0.391468	-0.27761	NaN	NaN		NaN	NaN	25.5153	25.5755	25.5326	25.1084	25.2425	25.0635	25.401	25.4499	25.3216	NaN	NaN	NaN	NaN	NaN	NaN
4585	7	7	26.2	38.681	0	36.425	2233400000	67	Q9NX62	Q9NX62	Inositol monophosphatase 3	IMPAD1			-0.402524	1.22198		0.11339	-0.614771	-0.129357	0.466045		0.527304	-0.208619	NaN	NaN		NaN	NaN	27.3872	27.2873	27.1744	26.6691	26.8218	27.1505	26.9501	27.2846	27.2261	NaN	NaN	NaN	NaN	NaN	NaN
2937	3	3	8.2	56.563	0.00044464	3.8993	332950000	12	Q6Y288	Q6Y288	Beta-1,3-glucosyltransferase	B3GALTL			-0.40198	0.577095		0.186351	-0.50636	0.058574	0.0920502		0.831746	0.081125	NaN	NaN		NaN	NaN	24.4457	24.8405	24.5066	24.5277	NaN	23.8636	24.8649	24.4475	NaN	NaN	NaN	NaN	NaN	NaN	NaN
1991	37	37	44.9	134.19	0	199.06	10995000000	296	Q5JPE7-2;P69849;Q5JPE7;Q15155;Q5JPE7-3	Q5JPE7-2;P69849;Q5JPE7;Q15155;Q5JPE7-3	Nodal modulator 2;Nodal modulator 3;Nodal modulator 1	NOMO2;NOMO3;NOMO1			-0.401255	1.80072		0.0949174	-0.669053	-0.192172	0.881376		0.317476	-0.319457	-0.493036	1.10683		0.0816093	-0.694938	29.3657	29.6407	29.3346	29.0896	29.0201	29.0275	29.2541	29.3057	29.2046	28.3984	28.3116	28.369	27.8203	28.2477	27.5319
762	21	21	52.3	69.283	0	308.89	20892000000	377	P04844;P04844-2	P04844;P04844-2	Dolichyl-diphosphooligosaccharide--protein glycosyltransferase subunit 2	RPN2	Predicted		-0.40051	2.70228		0.0838937	-0.720703	-0.0922387	0.620446		0.635675	-0.162728	0.239793	0.576456		0.342663	0.349936	30.2298	30.0651	30.0808	29.688	29.7371	29.7491	29.9593	30.0373	30.1024	30.1056	29.8649	30.1319	29.9972	30.5668	30.2579
3429	14	14	34.3	48.602	0	47.632	1404700000	44	Q8WU90;Q8WU90-2	Q8WU90	Zinc finger CCCH domain-containing protein 15	ZC3H15			-0.400337	1.10107		0.123468	-0.596658	-0.496405	2.25186	+	0.0314407	-0.83922	NaN	NaN		NaN	NaN	26.3738	26.2992	26.3449	25.6171	26.1925	26.0073	25.7112	25.8054	26.0122	NaN	NaN	NaN	NaN	NaN	NaN
2415	34	30	18.6	304.1	0	125.84	5091800000	166	Q14573	Q14573	Inositol 1,4,5-trisphosphate receptor type 3	ITPR3			-0.399996	2.09455		0.090778	-0.687715	-0.0390962	0.386361		0.847175	-0.0720517	NaN	NaN		NaN	NaN	28.4797	28.3981	28.3474	27.9025	27.9769	28.1457	28.364	28.4031	28.3408	NaN	NaN	NaN	NaN	NaN	NaN
405	30	28	57.8	74.435	0	137.87	10532000000	236	O60488-2;O60488	O60488-2;O60488	Long-chain-fatty-acid--CoA ligase 4	ACSL4	Predicted	+	-0.399436	1.97904		0.0916271	-0.679341	0.0625814	0.29904		0.76534	0.106982	0.15989	0.500527		0.490699	0.249996	29.3914	29.1772	29.1177	28.8351	28.7768	28.8761	29.3246	29.2852	29.2644	28.4056	28.6036	28.7748	28.5844	28.8905	28.7886
373	23	7	72.7	37.106	0	323.31	10300000000	149	O43852;O43852-3;O43852-5;O43852-6;O43852-10;O43852-9;O43852-15;O43852-13;O43852-14;O43852-11;O43852-12	O43852;O43852-3;O43852-5;O43852-6;O43852-10;O43852-9;O43852-15	Calumenin	CALU			-0.398905	1.95214		0.0923606	-0.67674	0.0721976	0.382752		0.722131	0.124623	0.549786	1.31575		0.064	0.790288	29.3334	29.2689	29.1934	28.7605	28.8159	29.0227	29.2064	29.4361	29.3697	28.2641	27.8887	28.1564	28.3942	28.9475	28.6168
645	38	38	37.1	157.18	0	323.31	7960500000	324	O95490-2;O95490-5;O95490;O95490-7;O95490-6;O95490-4;O95490-3;O94910-2;O94910;Q9HAR2-2;Q9HAR2;Q9HAR2-4	O95490-2;O95490-5;O95490;O95490-7;O95490-6;O95490-4;O95490-3	Latrophilin-2	LPHN2			-0.397601	0.954198		0.136212	-0.572056	-0.880501	1.63535	+	0.0223455	-1.18044	0.0808913	0.27502		0.710578	0.130881	27.5041	27.5765	27.5018	26.7486	27.2632	27.3778	26.9924	26.7745	26.174	30.5438	30.4686	30.6685	30.4376	30.7197	30.7663
1475	11	11	31.2	55.799	0	81.267	7260200000	177	P42785;P42785-2	P42785;P42785-2	Lysosomal Pro-X carboxypeptidase	PRCP			-0.397505	3.11972		0.0818291	-0.732097	0.271197	2.24205		0.124973	0.49281	0.164986	0.556968		0.473821	0.261335	28.4868	28.576	28.5268	28.0848	28.1131	28.1991	28.7167	28.8592	28.8273	28.7115	28.7502	28.3611	28.8562	28.7073	28.7543
3988	8	8	18.3	52.518	0	20.815	1221400000	45	Q9BT22;Q9BT22-2;Q6GMV1;C9J202	Q9BT22;Q9BT22-2	Chitobiosyldiphosphodolichol beta-mannosyltransferase	ALG1			-0.396942	0.751829		0.156437	-0.53456	-0.0731475	1.46531		0.683916	-0.139818	NaN	NaN		NaN	NaN	26.2733	26.265	26.2594	25.386	26.0716	26.1493	26.1483	26.206	26.2239	NaN	NaN	NaN	NaN	NaN	NaN
2234	3	2	12.7	27.832	0.00024378	5.9105	128920000	5	Q12983	Q12983	BCL2/adenovirus E1B 19 kDa protein-interacting protein 3	BNIP3	Known	+	-0.396715	1.11241		0.125049	-0.594147	-0.613469	1.66222	+	0.0269506	-0.918284	NaN	NaN		NaN	NaN	22.9661	23.5334	23.1844	22.7836	22.8831	22.827	22.5742	22.5943	22.675	NaN	NaN	NaN	NaN	NaN	NaN
242	2	2	9.7	36.648	0	38.236	2289700000	60	O15127	O15127	Secretory carrier-associated membrane protein 2	SCAMP2			-0.395545	1.83769		0.0953902	-0.663835	-0.522945	3.71755	+	0.0248862	-0.968977	0.642589	1.90655	+	0.0508557	0.990758	27.3437	27.245	27.3521	26.8461	26.8121	27.0959	26.759	26.8271	26.7858	25.5687	25.4655	25.5461	25.9024	26.2037	26.4021
1474	3	3	26.3	16.532	0	13.076	992180000	21	P42771;P42771-4;P42771-2;P42771-3;P42772	P42771;P42771-4;P42771-2	Cyclin-dependent kinase inhibitor 2A	CDKN2A			-0.395518	1.29717		0.113208	-0.615207	-0.447872	2.56843	+	0.0364598	-0.788975	NaN	NaN		NaN	NaN	26.2119	26.2634	26.2115	25.5502	25.9898	25.9603	25.827	25.8642	25.652	NaN	NaN	NaN	NaN	NaN	NaN
1620	23	23	65.1	46.44	0	223.84	32125000000	399	P50454	P50454	Serpin H1	SERPINH1			-0.395433	2.48594		0.0862028	-0.702515	0.105451	0.589189		0.590087	0.181834	0.19042	0.410086		0.457141	0.273112	30.908	30.7758	30.7989	30.3458	30.4394	30.5112	30.7967	31.0165	30.9859	30.1672	30.0325	30.2989	30.0224	30.6469	30.4005
1848	14	14	73	23.897	0	185.27	10176000000	183	P61106	P61106	Ras-related protein Rab-14	RAB14			-0.393834	2.39016		0.0887927	-0.695205	-0.223302	1.01441		0.240564	-0.370126	0.265637	1.0782		0.248958	0.431359	29.2434	29.1008	29.1826	28.7035	28.7613	28.8805	28.8741	29.1408	28.842	29.3322	29.3228	29.3338	29.3747	29.7667	29.6442
1428	13	12	41.3	42.592	0	134.06	3835800000	95	P39748;P39748-2	P39748;P39748-2	Flap endonuclease 1	FEN1	Known		-0.391511	0.460309		0.223939	-0.451429	-0.0144418	0.0532373		0.945951	-0.0243365	0.42743	0.93787		0.119395	0.59938	27.0079	26.9225	26.9181	25.8807	26.6556	27.1376	26.8077	26.8917	27.1058	29.2768	28.6783	29.0227	29.2512	29.6615	29.3474
3482	9	9	43.8	29.909	0	68.354	1562200000	73	Q8WXX5	Q8WXX5	DnaJ homolog subfamily C member 9	DNAJC9			-0.390923	0.60935		0.184762	-0.49626	-0.138587	0.652853		0.471434	-0.232522	0.758366	1.47308	+	0.0495562	1.02657	26.201	26.0208	26.2895	26.3328	25.5102	25.4956	25.9337	26.122	26.0399	26.9224	26.5783	26.5609	27.1104	27.8256	27.4007
139	21	21	35.1	81.879	0	67.831	4909500000	143	O00461	O00461	Golgi integral membrane protein 4	GOLIM4			-0.390453	2.37537		0.0905929	-0.689181	-0.256665	1.13932		0.183098	-0.423578	0.447793	0.96039		0.105084	0.623393	27.9994	28.0247	28.1448	27.5696	27.7313	27.6966	27.6176	27.8379	27.9434	27.6627	27.9704	28.1425	28.2791	28.1419	28.698
5035	7	3	54.1	20.745	0	33.266	4905200000	39	Q9Y3L5	Q9Y3L5	Ras-related protein Rap-2c	RAP2C			-0.389942	0.793005		0.156029	-0.53632	0.0720984	0.150024		0.766544	0.106163	0.224272	1.79477		0.278491	0.403385	27.8367	27.6404	27.2645	26.9548	27.1399	27.4771	27.6475	27.7633	27.5471	28.0426	28.1757	28.1138	28.2877	28.4159	28.3012
4162	4	4	17.2	27.567	0	21.241	697320000	19	Q9GZP9	Q9GZP9	Derlin-2	DERL2			-0.387224	1.85399		0.098811	-0.653223	0.16633	0.787127		0.390386	0.278371	NaN	NaN		NaN	NaN	25.4561	25.278	25.3386	24.9547	24.8461	25.1103	25.3594	25.6002	25.612	NaN	NaN	NaN	NaN	NaN	NaN
3072	62	62	50.5	156.27	0	320.72	25858000000	578	Q86UP2;Q86UP2-2;Q86UP2-4;Q86UP2-3;Q9Y4F3-3;Q9Y4F3-4;Q9Y4F3-5;Q9Y4F3	Q86UP2;Q86UP2-2;Q86UP2-4;Q86UP2-3	Kinectin	KTN1			-0.387172	2.47799		0.0901938	-0.689073	-0.0988146	0.841451		0.598715	-0.178203	0.209495	0.861201		0.353604	0.34169	30.6298	30.5015	30.5914	30.1114	30.1714	30.2784	30.4081	30.5434	30.4748	30.2674	30.1518	30.2028	30.2076	30.5684	30.4744
4249	7	7	18.3	37.205	0	17.5	5086900000	69	Q9H3K2	Q9H3K2	Growth hormone-inducible transmembrane protein	GHITM	Known	+	-0.38707	1.3477		0.116084	-0.610244	0.239057	1.85009		0.176804	0.428849	NaN	NaN		NaN	NaN	28.0968	28.1582	28.1366	27.4856	27.8154	27.9294	28.2631	28.4024	28.4433	NaN	NaN	NaN	NaN	NaN	NaN
4201	3	3	8.7	38.036	0	9.7324	1028200000	28	Q9H0U3;Q9H0U3-2	Q9H0U3	Magnesium transporter protein 1	MAGT1			-0.386653	1.66723		0.105311	-0.63852	-0.193029	0.669636		0.343117	-0.306018	NaN	NaN		NaN	NaN	25.9474	26.006	25.859	25.48	25.4307	25.7417	25.8425	25.892	25.4989	26.3264	25.8646	NaN	NaN	NaN	NaN
3781	4	4	9.4	63.882	0	13.553	434540000	16	Q96KC8	Q96KC8	DnaJ homolog subfamily C member 1	DNAJC1			-0.38614	0.749386		0.162802	-0.524184	-0.778121	1.33796	+	0.0237246	-1.00785	NaN	NaN		NaN	NaN	25.2603	24.9663	25.1073	24.3715	24.6727	25.1313	24.6288	24.5527	23.8181	NaN	NaN	NaN	NaN	NaN	NaN
4159	6	6	25.1	38.247	0	29.723	1657300000	39	Q9GZM5	Q9GZM5	Protein YIPF3;Protein YIPF3, 36 kDa form III	YIPF3			-0.386082	1.23207		0.123476	-0.596559	-0.479737	1.15695		0.0556374	-0.690276	0.131096	1.3725		0.508854	0.243428	26.7846	26.816	26.5935	26.1731	26.2634	26.5994	25.8973	26.5024	26.3552	25.9489	26.0422	26.0342	26.139	NaN	26.1401
1239	33	33	59.8	67.567	0	304.78	140760000000	906	P27824;P27824-2;P27824-3	P27824;P27824-2;P27824-3	Calnexin	CANX	Predicted		-0.38603	2.38895		0.0908362	-0.682958	-0.138696	1.1166		0.44407	-0.248375	0.141291	0.563932		0.517695	0.23115	33.2315	33.0652	33.1886	32.716	32.7544	32.8569	32.9654	33.0687	33.0351	31.0867	31.0264	31.2711	31.2402	31.4262	31.1416
1832	2	2	35.1	11.203	0	24.242	4212900000	72	P60903	P60903	Protein S100-A10	S100A10			-0.385815	1.59756		0.108458	-0.631718	-0.266312	1.4209		0.157739	-0.453491	NaN	NaN		NaN	NaN	28.3299	28.3216	28.1239	27.728	27.8583	28.0316	27.9559	28.1011	27.9195	NaN	NaN	NaN	NaN	NaN	NaN
222	10	10	21.8	70.311	0	28.562	1637100000	47	O14975;O14975-2	O14975;O14975-2	Very long-chain acyl-CoA synthetase	SLC27A2	Predicted		-0.385799	2.28096		0.0922941	-0.677068	-0.545723	4.49436	+	0.0241286	-1.03684	NaN	NaN		NaN	NaN	26.98	26.973	26.9373	26.4981	26.5207	26.7141	26.4218	26.455	26.3764	NaN	NaN	NaN	NaN	NaN	NaN
4813	11	11	27.8	61.064	0	85.289	2934600000	85	Q9UJ83-2;Q9UJ83;Q9UJ83-3;Q9UJ83-4	Q9UJ83-2;Q9UJ83;Q9UJ83-3;Q9UJ83-4	2-hydroxyacyl-CoA lyase 1	HACL1			-0.385636	1.97799		0.09632	-0.659212	0.255647	2.10373		0.149092	0.463246	NaN	NaN		NaN	NaN	27.5747	27.6135	27.4759	27.0484	27.1538	27.305	27.7615	27.8701	27.7994	NaN	NaN	NaN	NaN	NaN	NaN
182	6	6	22.3	37.808	0	12.938	526380000	21	O14656;O14656-2	O14656	Torsin-1A	TOR1A			-0.385441	2.49999		0.0903843	-0.687357	0.466183	1.81293	+	0.0425694	0.758142	NaN	NaN		NaN	NaN	24.6225	24.5209	24.5624	24.0985	24.1699	24.281	24.8959	25.2543	24.9542	NaN	NaN	NaN	NaN	NaN	NaN
3111	11	11	20.6	104.11	0	47.847	1755700000	62	Q86XL3;Q86XL3-2;Q86XL3-3	Q86XL3;Q86XL3-2	Ankyrin repeat and LEM domain-containing protein 2	ANKLE2			-0.385258	1.84741		0.0997354	-0.649966	-0.308665	2.05381		0.0967519	-0.546601	NaN	NaN		NaN	NaN	27.1142	26.9548	26.9581	26.4712	26.7055	26.6946	26.6529	26.7748	26.6735	NaN	NaN	NaN	NaN	NaN	NaN
4796	6	6	66.4	14.199	0	52.151	4530900000	60	Q9UI30;Q9UI30-2	Q9UI30;Q9UI30-2	Multifunctional methyltransferase subunit TRM112-like protein	TRMT112			-0.385226	0.826444		0.154461	-0.538002	-0.158367	0.340338		0.479116	-0.228715	1.13067	1.66198	+	0.0364211	1.39623	27.8768	27.5243	27.5662	27.2215	27.613	26.977	27.1834	27.6469	27.6618	28.2036	28.6059	28.8351	29.4411	30.1764	29.4192
761	29	29	60.6	68.569	0	245.04	47243000000	546	P04843	P04843	Dolichyl-diphosphooligosaccharide--protein glycosyltransferase subunit 1	RPN1			-0.384414	2.31355		0.0924268	-0.676629	-0.0948429	0.973625		0.607547	-0.173819	0.171611	0.398262		0.489452	0.251536	31.501	31.4384	31.3498	30.9604	31.0354	31.1401	31.3296	31.3588	31.3163	30.9001	30.5938	30.8428	30.7076	31.2419	30.902
2936	6	6	13.4	70.982	0	15.159	885350000	14	Q6WKZ4-3;Q6WKZ4;Q6WKZ4-5;Q6WKZ4-1;Q6WKZ4-2;Q7L804;Q7L804-2	Q6WKZ4-3;Q6WKZ4;Q6WKZ4-5	Rab11 family-interacting protein 1	RAB11FIP1			-0.38403	0.525561		0.21053	-0.467526	-0.624758	0.900404	+	0.0426435	-0.758512	NaN	NaN		NaN	NaN	26.2444	25.2192	25.3741	25.1664	25.2996	25.2195	24.9624	25.092	24.909	NaN	NaN	NaN	NaN	NaN	NaN
840	2	2	7.4	39.759	0	15.402	550800000	15	P08174-4;P08174;P08174-3;P08174-5;P08174-2;P08174-6;P08174-7	P08174-4;P08174;P08174-3;P08174-5;P08174-2;P08174-6;P08174-7	Complement decay-accelerating factor	CD55			-0.382514	1.67309		0.108193	-0.633323	-0.275256	1.0722		0.165242	-0.443484	NaN	NaN		NaN	NaN	25.4022	25.3846	25.1809	24.8265	24.9094	25.0842	25.1191	25.1685	24.8543	NaN	NaN	NaN	NaN	NaN	NaN
3043	8	7	46.8	20.781	0	41.204	5295300000	72	Q7Z7H5-3;Q7Z7H5;Q7Z7H5-2	Q7Z7H5-3;Q7Z7H5;Q7Z7H5-2	Transmembrane emp24 domain-containing protein 4	TMED4			-0.381979	0.711871		0.172475	-0.512645	-0.165718	0.382475		0.455401	-0.242919	-0.0499961	0.0895364		0.838877	-0.0715601	28.0058	28.3004	28.2795	27.6404	27.538	28.2614	27.7814	28.316	27.9912	28.0307	27.6547	28.194	27.6866	27.9539	28.0889
1876	4	4	35.4	12.497	0	13.41	4399600000	67	P61803	P61803	Dolichyl-diphosphooligosaccharide--protein glycosyltransferase subunit DAD1	DAD1			-0.381731	1.62791		0.110615	-0.628691	-0.044241	0.288827		0.833938	-0.0787352	0.314061	0.87178		0.208138	0.470386	28.1241	27.9556	27.9621	27.493	27.5978	27.8058	27.9275	28.0231	27.9585	27.1698	26.971	27.3796	27.6234	27.5892	27.25
3833	23	23	44.6	77.153	0	128.69	4444300000	136	Q96RR1;Q96RR1-2;Q96RR1-3	Q96RR1;Q96RR1-2;Q96RR1-3	Twinkle protein, mitochondrial	PEO1		+	-0.381219	2.10576		0.0962088	-0.660427	-0.350129	2.06158		0.0755238	-0.611029	0.00610034	0.019787		0.965532	0.0101225	28.0203	28.2209	28.2098	27.7521	27.8481	27.7071	27.7389	27.8525	27.8092	27.4362	27.579	27.5016	27.5643	27.3291	27.6417
2096	9	9	44.3	20.762	0	25.373	9390500000	157	Q02543	Q02543	60S ribosomal protein L18a	RPL18A	Predicted		-0.381112	1.12601		0.134556	-0.578167	-0.59519	1.93813	+	0.0252493	-0.93771	0.656734	1.55333	+	0.0505316	0.945337	27.7913	27.7041	27.8179	27.1175	27.3967	27.6557	27.145	27.4154	26.9673	30.256	30.2459	30.5921	30.7209	31.2564	31.0869
684	11	11	44.4	36.694	0	37.746	4416700000	69	O95900;O95900-2	O95900;O95900-2	Probable tRNA pseudouridine synthase 2	TRUB2	Known	+	-0.380708	1.19085		0.131122	-0.58545	-1.49832	3.27972	+	0.0149565	-2.31497	0.499622	0.383938		0.202927	0.476965	27.7883	28.2502	27.9416	27.7345	27.5873	27.5162	26.3865	26.5204	26.5783	27.1484	26.4388	27.092	26.3981	27.8473	27.9327
461	13	13	15.6	146.67	0	44.387	452730000	36	O75153;Q9Y5I4-2;Q9Y5I4	O75153	Clustered mitochondria protein homolog	CLUH	Known		-0.379948	0.793137		0.160976	-0.526816	-0.276683	0.722049		0.199346	-0.416855	NaN	NaN		NaN	NaN	23.9068	23.6365	23.8638	23.0154	23.6638	23.5881	NaN	23.6905	23.3609	NaN	NaN	NaN	NaN	NaN	NaN
1862	15	15	54.4	24.146	0	79.329	20463000000	286	P61313;P61313-2	P61313	60S ribosomal protein L15	RPL15	Predicted		-0.379548	2.28545		0.094749	-0.667652	-0.621129	2.10554	+	0.0234232	-0.992453	0.484916	1.31437		0.0755265	0.720763	29.5723	29.6306	29.6445	29.117	29.3399	29.2519	28.9273	29.2349	28.8218	31.3219	31.4222	31.4398	31.5491	32.105	31.9845
3065	9	9	38	29.328	0	15.546	1018200000	18	Q86U90	Q86U90	YrdC domain-containing protein, mitochondrial	YRDC	Known		-0.378421	1.74154		0.108222	-0.632797	-0.362253	1.78373		0.0753745	-0.612838	NaN	NaN		NaN	NaN	25.8692	25.9122	26.1449	25.5437	25.6921	25.5553	25.6738	25.5946	25.5711	NaN	NaN	NaN	NaN	NaN	NaN
1407	8	8	47.1	14.57	0	28.067	3229700000	54	P37108	P37108	Signal recognition particle 14 kDa protein	SRP14			-0.377067	0.204771		0.415679	-0.316142	0.178751	0.118537		0.621112	0.172373	0.529024	0.575139		0.127673	0.581665	NaN	26.2417	27.5144	25.7708	26.6232	27.1089	26.676	27.3205	27.1738	28.7115	27.8465	28.2422	28.2003	29.3163	28.8706
3975	7	7	42.7	29.233	0	50.334	4602400000	87	Q9BSF4	Q9BSF4	Uncharacterized protein C19orf52	C19orf52	Predicted	+	-0.375596	1.6413		0.112664	-0.621385	-0.994549	3.43094	+	0.0079322	-1.68753	-0.406687	1.80515		0.0862756	-0.676934	28.2055	28.3299	28.0582	27.7084	27.812	27.9464	27.1832	27.1416	27.2852	28.0333	28.1655	27.8542	27.6545	27.6574	27.5211
5133	10	9	24.7	57.504	0	51.004	821930000	43	Q9Y6I3-3;Q9Y6I3;Q9Y6I3-1	Q9Y6I3-3;Q9Y6I3;Q9Y6I3-1	Epsin-1	EPN1			-0.375327	1.61111		0.113154	-0.618664	-0.0796083	0.172445		0.738181	-0.117988	0.664663	1.46101	+	0.0502605	0.934613	25.3953	25.472	25.1318	24.9988	24.9051	24.9692	25.1024	25.5354	25.1224	25.8093	25.6607	25.9044	26.0904	26.7746	26.5035
3920	15	15	26.4	92.755	0	68.809	2922000000	78	Q99959-2;Q99959	Q99959-2;Q99959	Plakophilin-2	PKP2			-0.372747	0.937013		0.151491	-0.54335	-0.0600955	0.130694		0.805311	-0.0898268	NaN	NaN		NaN	NaN	27.7917	27.576	27.5938	26.9918	27.2623	27.5891	27.6406	27.8343	27.3063	NaN	NaN	NaN	NaN	NaN	NaN
4092	7	7	10.1	96.109	0	17.136	472440000	23	Q9BXP2;Q9BXP2-2;Q9BXP2-3;Q9BXP2-4	Q9BXP2	Solute carrier family 12 member 9	SLC12A9			-0.372517	1.5809		0.114734	-0.612461	-0.230438	1.12656		0.220292	-0.386513	NaN	NaN		NaN	NaN	24.5913	24.6747	24.8768	24.2072	24.405	24.4129	24.4377	24.5748	24.4389	NaN	NaN	NaN	NaN	NaN	NaN
3567	23	16	39.2	101.31	0	156.08	2388400000	95	Q92973-2;Q92973;Q92973-3	Q92973-2;Q92973;Q92973-3	Transportin-1	TNPO1			-0.371772	0.66751		0.186634	-0.493996	-0.0879167	0.157883		0.723635	-0.124054	0.676097	0.691273		0.0768851	0.715198	26.3069	26.5772	26.0785	25.5425	26.2236	26.0812	25.9997	26.5155	26.1836	28.3558	28.0127	28.0766	28.1243	29.615	28.7341
1750	3	3	13.1	26.537	0.00024975	6.4922	478110000	20	P55061;P55061-2	P55061;P55061-2	Bax inhibitor 1	TMBIM6	Predicted		-0.371177	1.64149		0.113409	-0.61534	-0.0033474	0.0220663		0.98328	-0.0060792	NaN	NaN		NaN	NaN	25.1025	24.9944	24.9585	24.7266	24.4606	24.7547	24.9821	25.067	24.9962	NaN	NaN	NaN	NaN	NaN	NaN
2028	8	8	16.5	60.693	0	20.678	995200000	40	P83111;P83111-2	P83111;P83111-2	Serine beta-lactamase-like protein LACTB, mitochondrial	LACTB	Known	+	-0.370639	3.30463		0.0900357	-0.691638	0.140959	1.91786		0.414501	0.264788	NaN	NaN		NaN	NaN	26.0108	26.0534	25.9505	25.6209	25.6735	25.6084	26.1227	26.1494	26.1655	NaN	NaN	NaN	NaN	NaN	NaN
777	6	5	95.6	11.514	0	270.93	19692000000	105	P05386	P05386	60S acidic ribosomal protein P1	RPLP1			-0.370193	2.12908		0.102065	-0.645087	-0.702974	2.13892	+	0.02675	-1.09948	0.226381	0.748625		0.335851	0.354348	29.6835	29.7249	29.9071	29.3474	29.4264	29.4311	28.8543	29.0783	29.274	30.8952	30.9074	30.7787	31.0241	30.8949	31.3415
4589	5	5	9.9	69.803	0	8.6165	293350000	10	Q9NXE4-8;Q9NXE4-6;Q9NXE4-2;Q9NXE4;Q9NXE4-4;Q9NXE4-9;Q9NXE4-10;Q9NXE4-7;Q9NXE4-3;Q9NXE4-5	Q9NXE4-8;Q9NXE4-6;Q9NXE4-2;Q9NXE4;Q9NXE4-4;Q9NXE4-9;Q9NXE4-10;Q9NXE4-7;Q9NXE4-3	Sphingomyelin phosphodiesterase 4	SMPD4			-0.370021	0.919194		0.154424	-0.537804	0.558654	1.13277	+	0.0418549	0.763258	NaN	NaN		NaN	NaN	23.9676	24.0332	24.1054	23.3163	23.7402	23.9396	24.1698	24.9533	24.6591	NaN	NaN	NaN	NaN	NaN	NaN
95	8	8	66	11.133	0	63.189	8394800000	103	L0R6Q1	L0R6Q1		SLC35A4			-0.369922	1.00741		0.147056	-0.550238	-0.323924	0.802206		0.139614	-0.47174	-0.228384	0.502608		0.374049	-0.326894	28.9839	28.9208	28.691	28.2683	28.4454	28.7721	28.4011	28.8683	28.3544	29.2612	28.6705	28.6749	28.5951	28.626	28.7004
2373	24	24	36.6	122.29	0	111.45	7967600000	175	Q14126	Q14126	Desmoglein-2	DSG2			-0.369582	1.25923		0.134805	-0.579514	0.0547752	0.330755		0.79054	0.0964006	NaN	NaN		NaN	NaN	29.1277	28.9832	29.0647	28.4384	28.7464	28.8821	29.1291	29.1977	29.0131	NaN	NaN	NaN	NaN	NaN	NaN
2812	3	3	19.1	17.487	0.00025648	7.2275	314160000	12	Q5W111-2;Q5W111	Q5W111-2;Q5W111	SPRY domain-containing protein 7	SPRYD7			-0.36941	2.56802		0.0955845	-0.683976	-0.781694	3.03468	+	0.0125846	-1.3987	NaN	NaN		NaN	NaN	NaN	24.3961	24.3378	24.0062	23.9487	24.0378	23.5471	23.6699	23.5388	NaN	NaN	NaN	NaN	NaN	NaN
3820	5	5	17.6	56.025	0	53.227	3263400000	63	Q96QD8;Q96QD8-2	Q96QD8;Q96QD8-2	Sodium-coupled neutral amino acid transporter 2	SLC38A2			-0.366779	1.3853		0.13	-0.588228	-1.09526	3.30412	+	0.00995745	-1.80713	NaN	NaN		NaN	NaN	28.1774	27.8703	27.9885	27.5144	27.6162	27.8053	26.8871	27.0271	26.8363	NaN	NaN	NaN	NaN	26.996	NaN
2436	11	11	49.6	26.076	0	64.589	3381500000	98	Q14696;Q14696-2	Q14696	LDLR chaperone MESD	MESDC2			-0.366477	2.85755		0.0940455	-0.670731	-0.0176786	0.146684		0.92523	-0.0324486	0.0441119	0.0453888		0.881117	0.0530084	27.6665	27.6808	27.6229	27.3265	27.2046	27.3396	27.5609	27.7014	27.6548	27.503	27.2425	26.8989	26.6993	27.6044	27.473
921	12	12	34.1	42.981	0	49.754	1411100000	51	P10644;P10644-2	P10644;P10644-2	cAMP-dependent protein kinase type I-alpha regulatory subunit;cAMP-dependent protein kinase type I-alpha regulatory subunit, N-terminally processed	PRKAR1A			-0.36621	1.09369		0.142495	-0.557028	-0.456873	2.07042	+	0.0409514	-0.76821	0.0892588	0.145459		0.728077	0.12261	26.1477	26.0272	25.9558	25.4063	25.9121	25.7138	25.7291	25.5635	25.4676	27.3054	26.9957	27.3011	26.9793	27.6734	27.2173
2901	5	5	19.5	31.571	0	20.597	564570000	20	Q6PCB8-2;Q6PCB8	Q6PCB8-2;Q6PCB8	Embigin	EMB			-0.366196	1.08941		0.142339	-0.556495	-0.603467	2.44975	+	0.0238812	-1.00888	NaN	NaN		NaN	NaN	25.4939	25.408	25.433	24.783	25.1408	25.3125	24.7335	25.0304	24.7605	NaN	NaN	NaN	NaN	NaN	NaN
3071	5	4	11.6	52.07	0	11.263	296210000	10	Q86UL3	Q86UL3	Glycerol-3-phosphate acyltransferase 4	AGPAT6			-0.365275	1.5449		0.122674	-0.599821	-0.171914	0.457262		0.424039	-0.259614	NaN	NaN		NaN	NaN	24.5859	24.2564	24.2776	23.9629	24.0208	24.0404	23.968	24.2544	24.3818	NaN	NaN	NaN	NaN	NaN	NaN
597	7	7	23.9	34.114	0	21.171	1908500000	82	O95159	O95159	Zinc finger protein-like 1	ZFPL1			-0.364955	0.906465		0.158242	-0.530545	-0.317282	0.991572		0.127142	-0.488094	0.327484	0.809524		0.202818	0.47658	26.2428	26.4232	25.9828	25.618	25.8412	26.0947	25.7422	25.9692	25.9857	27.7741	27.3882	27.558	27.6169	28.1278	27.958
2100	22	22	58.1	53.879	0	94.2	8573400000	209	Q02818	Q02818	Nucleobindin-1	NUCB1			-0.364264	1.02471		0.149076	-0.54621	-0.339548	1.21067		0.10065	-0.537435	0.225138	0.682516		0.347854	0.346377	28.9574	29.0715	28.7053	28.3197	28.5625	28.7592	28.4213	28.6507	28.6435	28.6732	28.6708	29.0401	28.902	29.1879	28.9697
2789	3	3	13.8	26.806	0	20.929	1183000000	20	Q5UCC4-2;Q5UCC4	Q5UCC4-2;Q5UCC4	ER membrane protein complex subunit 10	EMC10			-0.364055	2.08633		0.108395	-0.652332	-0.165466	2.15479		0.335558	-0.310753	NaN	NaN		NaN	NaN	26.4147	26.3368	26.3697	NaN	25.9423	26.0771	26.2217	26.1628	26.2403	NaN	NaN	NaN	NaN	NaN	NaN
4395	19	19	23.2	121.11	0	55.533	2844400000	126	Q9HD20-2;Q9HD20;Q9HD20-3	Q9HD20-2;Q9HD20	Manganese-transporting ATPase 13A1	ATP13A1			-0.363863	1.76588		0.113586	-0.613956	-0.262783	1.46531		0.159908	-0.450578	0.40263	2.5077		0.0767406	0.714943	27.3512	27.4798	27.332	26.9142	26.9772	27.18	27.0052	27.2444	27.125	26.8453	26.9441	26.844	27.173	27.3302	27.3381
4969	9	9	14.8	125.82	0	35.363	1124200000	41	Q9Y2H6-2;Q9Y2H6	Q9Y2H6-2;Q9Y2H6	Fibronectin type-III domain-containing protein 3A	FNDC3A			-0.362927	2.52102		0.0991906	-0.6522	-0.146314	2.15352		0.3922	-0.276725	NaN	NaN		NaN	NaN	26.2255	26.2528	26.1716	25.8653	25.936	25.7598	26.0742	26.096	26.0408	NaN	NaN	NaN	NaN	NaN	NaN
1231	2	2	7.4	37.983	0.00022978	4.5261	294580000	17	P27544-2;P27544	P27544-2;P27544	Ceramide synthase 1	CERS1			-0.362567	2.8027		0.0958866	-0.662291	0.0539703	0.433812		0.787191	0.097548	NaN	NaN		NaN	NaN	24.2985	24.158	24.2204	23.8944	23.8148	23.8801	24.2179	24.2839	24.337	NaN	NaN	NaN	NaN	NaN	NaN
1705	8	8	39	38.598	0	89.084	545120000	44	P53367-2;P53367;P53367-3	P53367-2;P53367	Arfaptin-1	ARFIP1			-0.362529	1.29268		0.136032	-0.574111	-0.244525	0.883897		0.218657	-0.388825	0.526227	1.37932		0.0642506	0.776069	25.0891	24.7131	24.7766	24.4008	24.4789	24.6114	24.6886	24.5058	24.6507	25.3798	25.8134	25.4911	25.9187	26.3238	26.0205
237	22	22	54	65.485	0	181.36	6213800000	198	O15091-2;O15091;O15091-4;O15091-3	O15091-2;O15091;O15091-4	Mitochondrial ribonuclease P protein 3	KIAA0391	Known	+	-0.362379	2.8186		0.0958621	-0.662529	0.273374	2.43732		0.120437	0.501776	0.25997	2.2184		0.205233	0.473566	28.1325	28.2658	28.2471	27.8934	27.8453	27.8196	28.5164	28.4594	28.4898	28.7142	28.6258	28.5538	28.9216	28.883	28.8691
4336	5	5	11.9	51.581	0	11.595	143410000	27	Q9H9C1-2;Q9H9C1	Q9H9C1-2;Q9H9C1	Spermatogenesis-defective protein 39 homolog	VIPAS39			-0.361758	0.747334		0.181009	-0.500874	-0.701586	1.63304	+	0.0236471	-1.00764	NaN	NaN		NaN	NaN	22.5364	23.0256	22.8268	22.1004	22.6644	22.5387	21.8241	22.2183	22.2416	NaN	NaN	NaN	NaN	NaN	NaN
2851	5	5	17.6	38.638	0.00025934	7.5966	655930000	10	Q6IN84;Q6IN84-2	Q6IN84	rRNA methyltransferase 1, mitochondrial	MRM1	Known	+	-0.361449	1.26907		0.136312	-0.570445	-0.0045414	0.0137568		0.980788	-0.00745469	0.264872	2.17882		0.199428	0.48056	24.7477	24.758	25.067	24.3867	24.6588	24.4429	24.7941	24.8979	24.8672	25.4041	25.5057	25.5607	25.7983	25.7456	25.7212
889	52	52	58.9	113.08	0	323.31	23472000000	555	P09874	P09874	Poly [ADP-ribose] polymerase 1	PARP1	Known		-0.361337	1.71297		0.11849	-0.606794	-0.237212	1.33152		0.199445	-0.406626	0.595599	1.48129		0.05317	0.867795	30.2223	30.3267	30.2086	29.9644	29.7162	29.993	29.8715	30.1214	30.0531	30.7106	30.2606	30.4037	30.8737	31.3081	30.9799
1009	58	56	68.4	92.468	0	323.31	324450000000	2091	P14625;Q58FF3	P14625	Endoplasmin	HSP90B1	Predicted		-0.360901	2.13672		0.108656	-0.631326	-0.267719	2.21278		0.128152	-0.486228	-0.0982742	0.320213		0.657056	-0.157033	34.3473	34.2604	34.2885	33.851	33.8931	34.0695	33.9616	34.1115	34.02	33.2883	33.0085	33.3082	33.0398	33.2631	33.0072
4651	12	12	66.9	20.266	0	63.599	16788000000	181	Q9P032	Q9P032	NADH dehydrogenase [ubiquinone] 1 alpha subcomplex assembly factor 4	NDUFAF4	Known	+	-0.359182	2.91083		0.096016	-0.660239	-0.0698999	0.895294		0.710963	-0.130312	-0.575842	1.23759		0.0631034	-0.801438	29.8124	29.8988	29.856	29.4475	29.4748	29.5674	29.7446	29.8353	29.7776	29.6259	29.924	29.6981	28.7753	29.3849	29.3603
4013	8	8	41.2	23.916	0	33.118	3164000000	83	Q9BTZ2-8;Q9BTZ2-4;Q9BTZ2;Q9BTZ2-5;Q9BTZ2-3;Q9BTZ2-7;Q9BTZ2-2;Q6PKH6;Q6PKH6-2;P0CG22	Q9BTZ2-8;Q9BTZ2-4;Q9BTZ2;Q9BTZ2-5;Q9BTZ2-3;Q9BTZ2-7;Q9BTZ2-2;Q6PKH6;Q6PKH6-2	Dehydrogenase/reductase SDR family member 4;Dehydrogenase/reductase SDR family member 4-like 2	DHRS4;DHRS4L2	Predicted	+	-0.357221	2.57035		0.101912	-0.644916	0.405685	2.02783		0.0546289	0.691701	0.0831572	0.362527		0.69247	0.139592	27.29	27.4133	27.4526	26.994	27.0197	27.0707	27.8918	27.6532	27.828	26.6325	26.3932	26.3693	26.6398	26.5002	26.5045
1477	11	11	20.4	85.561	0	46.992	1490000000	59	P42892-3;P42892-2;P42892-4;P42892	P42892-3;P42892-2;P42892-4;P42892	Endothelin-converting enzyme 1	ECE1			-0.357086	1.46415		0.132405	-0.582354	-0.499588	2.8545	+	0.02894	-0.886817	NaN	NaN		NaN	NaN	26.6927	26.5423	26.6532	26.3555	26.0659	26.3955	26.1989	26.144	26.0465	NaN	NaN	NaN	NaN	NaN	NaN
4979	6	6	76	13.507	0	12.589	753140000	23	Q9Y2Q5;Q9Y2Q5-2;Q9Y2Q5-3	Q9Y2Q5;Q9Y2Q5-2;Q9Y2Q5-3	Ragulator complex protein LAMTOR2	LAMTOR2			-0.354363	0.982197		0.161911	-0.567606	NaN	NaN		NaN	NaN	NaN	NaN		NaN	NaN	NaN	25.6925	25.4473	25.195	25.2361	NaN	NaN	25.2093	NaN	NaN	NaN	NaN	NaN	NaN	NaN
4741	28	28	44	102.13	0	193.07	22715000000	340	Q9UDR5	Q9UDR5	Alpha-aminoadipic semialdehyde synthase, mitochondrial;Lysine ketoglutarate reductase;Saccharopine dehydrogenase	AASS	Known	+	-0.352883	4.47051		0.0908387	-0.682208	-0.0373274	0.735095		0.849882	-0.0713342	NaN	NaN		NaN	NaN	30.6133	30.5922	30.6133	30.243	30.2328	30.2844	30.5709	30.6063	30.5296	NaN	NaN	NaN	NaN	NaN	NaN
3876	7	7	30.6	42.007	0	35.637	2531500000	75	Q99538-3;Q99538-2;Q99538	Q99538-3;Q99538-2;Q99538	Legumain	LGMN			-0.351446	2.15156		0.112777	-0.617537	0.238029	1.41223		0.193582	0.411455	NaN	NaN		NaN	NaN	27.2389	27.2202	27.2402	27.016	26.7887	26.8402	27.5799	27.5142	27.3193	NaN	26.5932	NaN	26.1232	NaN	NaN
4824	11	11	57.5	25.425	0	65.831	991520000	57	Q9UK41;Q9UK41-2	Q9UK41;Q9UK41-2	Vacuolar protein sorting-associated protein 28 homolog	VPS28			-0.350982	0.57106		0.222822	-0.453835	-0.192113	0.878449		0.318132	-0.319209	0.368602	1.19612		0.132775	0.571609	25.4152	25.4081	25.3208	24.4874	25.2844	25.3194	25.0787	25.3831	25.1061	26.4065	26.6609	26.7612	26.9496	27.1624	26.8224
1836	10	6	46.4	23.668	0	71.301	4863200000	72	P61006;P61006-2;P59190-2;P59190	P61006;P61006-2	Ras-related protein Rab-8A	RAB8A			-0.349572	2.90788		0.102897	-0.643878	-0.395502	2.71463		0.0520815	-0.713117	0.229193	0.954703		0.314432	0.374271	28.2041	28.1462	28.1349	27.8	27.7547	27.8818	27.6799	27.8539	27.7649	27.6828	27.414	27.4437	27.6226	27.8758	27.7296
763	18	9	64.5	40.45	0	174.32	6099200000	111	P04899;P04899-6;P04899-3;P04899-5;P04899-2;P04899-4;P19087;P11488;A8MTJ3	P04899;P04899-6;P04899-3;P04899-5;P04899-2;P04899-4	Guanine nucleotide-binding protein G(i) subunit alpha-2	GNAI2			-0.348901	1.29294		0.142276	-0.556912	0.449168	2.28223	+	0.0389745	0.772816	0.247761	0.827521		0.297827	0.387869	27.8503	27.66	27.6453	27.2263	27.3015	27.581	28.1528	28.2561	28.0942	29.2515	29.3771	29.4752	29.371	29.7208	29.7554
3415	27	27	18.8	205.11	0	98.37	6649000000	99	Q8TEM1;Q8TEM1-2	Q8TEM1;Q8TEM1-2	Nuclear pore membrane glycoprotein 210	NUP210			-0.348102	1.15449		0.151504	-0.542391	0.604799	3.22476	+	0.0253279	1.0773	NaN	NaN		NaN	NaN	28.5024	28.6482	28.5061	27.9618	28.2285	28.4221	29.1295	29.2327	29.1089	NaN	NaN	NaN	NaN	NaN	NaN
97	5	5	15.4	33.615	0	11.8	4607600000	26	O00115-2;O00115	O00115-2;O00115	Deoxyribonuclease-2-alpha	DNASE2			-0.347954	3.24993		0.0994677	-0.650623	0.326373	0.933503		0.124824	0.491933	-0.502421	1.59782		0.0643224	-0.809389	27.9072	27.8947	27.9256	27.62	27.5035	27.5602	28.0561	28.5614	28.0892	27.7156	27.4664	27.4771	26.9707	NaN	27.1305
3991	4	4	23.1	24.516	0	12.396	361790000	25	Q9BT30	Q9BT30	Alpha-ketoglutarate-dependent dioxygenase alkB homolog 7, mitochondrial	ALKBH7	Known	+	-0.347618	1.44402		0.137171	-0.568115	-0.179919	0.397495		0.426859	-0.263016	NaN	NaN		NaN	NaN	24.5508	24.4377	24.3836	23.9218	24.2651	24.1424	24.0457	24.5092	NaN	NaN	NaN	NaN	NaN	NaN	NaN
3300	12	12	42.3	35.932	0	82.252	3461800000	88	Q8NBN7;Q8NBN7-2	Q8NBN7;Q8NBN7-2	Retinol dehydrogenase 13	RDH13	Predicted	+	-0.346966	0.999981		0.162759	-0.523519	0.210129	1.04975		0.263335	0.353727	-0.140837	0.290242		0.570313	-0.202292	27.2704	27.4109	27.4173	27.2036	26.7101	27.144	27.6657	27.6485	27.4148	28.0011	27.9127	27.6689	27.8129	27.3918	27.9555
719	5	5	10.9	75.854	0	19.262	475260000	9	P01130-2;P01130-3;P01130-6;P01130-4;P01130-5;P01130	P01130-2;P01130-3;P01130-6;P01130-4;P01130-5;P01130	Low-density lipoprotein receptor	LDLR			-0.345082	0.691038		0.207448	-0.483971	NaN	NaN		NaN	NaN	NaN	NaN		NaN	NaN	26.0081	25.688	25.4846	25.2721	NaN	25.4916	NaN	NaN	NaN	NaN	NaN	NaN	NaN	NaN	NaN
3452	3	3	15.4	38.945	0	11.443	630320000	18	Q8WVQ1-3;Q8WVQ1;Q8WVQ1-2	Q8WVQ1-3;Q8WVQ1	Soluble calcium-activated nucleotidase 1	CANT1			-0.344946	2.05798		0.121022	-0.602942	-0.346989	1.26812		0.0947788	-0.552197	NaN	NaN		NaN	NaN	25.5624	25.618	25.3984	25.1655	25.1405	25.2379	25.0667	25.3996	25.0715	NaN	NaN	NaN	NaN	NaN	NaN
275	18	18	18.4	149.52	0	52.306	2418800000	75	O15439;O15439-2;O15439-4;O15439-3	O15439;O15439-2;O15439-4;O15439-3	Multidrug resistance-associated protein 4	ABCC4			-0.344474	0.931163		0.172873	-0.511906	-0.442197	1.64408		0.0524472	-0.7101	0.675567	0.434244		0.128211	0.579278	27.3082	27.0422	26.945	26.487	26.8576	26.9174	26.7101	26.7169	26.5419	26.2545	26.8714	26.0277	25.8267	27.6715	27.6821
2998	7	7	28.7	41.881	0	29.871	1989400000	60	Q7LGA3;Q7LGA3-2;Q7LGA3-3	Q7LGA3;Q7LGA3-2;Q7LGA3-3	Heparan sulfate 2-O-sulfotransferase 1	HS2ST1			-0.344393	0.942401		0.171946	-0.5133	0.0342426	0.091405		0.886144	0.0540539	NaN	NaN		NaN	NaN	27.0393	27.0899	26.6679	26.4574	26.5058	26.8008	26.9667	26.9857	26.9475	25.7224	25.6741	26.1358	NaN	NaN	NaN
441	5	5	46.8	16.832	0	73.765	3080800000	66	O60888-3;O60888;O60888-2	O60888-3;O60888;O60888-2	Protein CutA	CUTA			-0.343809	0.93247		0.173378	-0.511345	-0.145178	1.0457		0.428261	-0.256853	0.361178	0.904388		0.162123	0.526236	26.8611	26.9133	26.782	26.2302	26.8109	26.4839	26.8124	26.6618	26.6468	28.2085	28.1414	28.3986	28.3115	28.8989	28.6216
1529	13	13	48.2	29.668	0	135.17	44693000000	292	P47985;P0C7P4	P47985;P0C7P4	Cytochrome b-c1 complex subunit Rieske, mitochondrial;Cytochrome b-c1 complex subunit 11;Putative cytochrome b-c1 complex subunit Rieske-like protein 1	UQCRFS1;UQCRFS1P1	Known	+	-0.34373	2.13959		0.119208	-0.605031	-0.414878	2.50229	+	0.048261	-0.733901	0.522309	1.64271		0.0619617	0.809654	31.3124	31.1349	31.1065	30.8272	30.8112	30.8842	30.753	30.7898	30.7663	31.3496	31.383	31.2732	31.666	31.7732	32.1335
2848	8	8	74.5	17.745	0	103.74	6923000000	103	Q6IAA8	Q6IAA8	Ragulator complex protein LAMTOR1	LAMTOR1			-0.343526	1.67885		0.134572	-0.579301	-0.48486	3.17514	+	0.0289434	-0.880436	-0.0283203	0.082298		0.900191	-0.045555	28.6671	28.6017	28.7348	28.3627	28.1623	28.448	28.2135	28.2186	28.1169	28.7485	28.5073	28.4642	28.4135	28.7001	28.5214
504	6	6	58.4	10.058	0	48.31	9652800000	119	O75531	O75531	Barrier-to-autointegration factor;Barrier-to-autointegration factor, N-terminally processed	BANF1			-0.342372	2.51942		0.113357	-0.618759	0.436277	3.09227	+	0.0355234	0.796213	0.565257	1.77017		0.0523794	0.8784	28.648	28.6229	28.712	28.3233	28.2362	28.3962	29.1032	29.1632	29.0253	29.5397	29.3654	29.4741	29.8409	30.2862	29.9479
4014	5	5	14.2	76.914	0	19.999	1037600000	34	Q9BU23-2;Q9BU23;Q9BU23-3	Q9BU23-2;Q9BU23;Q9BU23-3	Lipase maturation factor 2	LMF2			-0.341618	1.44046		0.140889	-0.559802	0.063715	0.203162		0.776303	0.102598	NaN	NaN		NaN	NaN	26.2166	25.9468	26.1739	25.6288	25.8591	25.8245	26.0143	26.3142	26.1999	NaN	NaN	NaN	NaN	NaN	NaN
2398	11	11	49.2	32.62	0	92.391	3415200000	101	Q14249	Q14249	Endonuclease G, mitochondrial	ENDOG	Known	+	-0.34114	1.58341		0.136495	-0.569581	-0.781974	3.26385	+	0.0106102	-1.35391	-0.877649	2.66745	+	0.0393182	-1.40482	26.9398	27.0647	27.1638	26.8083	26.7695	26.5672	26.2185	26.2461	26.3579	29.0884	29.2422	29.3881	28.5214	28.2104	28.3539
2745	7	7	26.1	52.562	0	15.753	740180000	27	Q5SQN1;Q5SQN1-2;Q5SQN1-4;Q5SQN1-3	Q5SQN1;Q5SQN1-2;Q5SQN1-4	Synaptosomal-associated protein 47	SNAP47			-0.34053	1.34909		0.147461	-0.55101	0.162041	0.572833		0.424414	0.258906	NaN	NaN		NaN	NaN	25.5996	25.6053	25.5231	25.1999	25.45	25.0564	25.9822	25.5897	25.6421	NaN	NaN	NaN	NaN	NaN	NaN
4893	12	12	47.5	34.856	0	87.924	3364400000	100	Q9UNE7;Q9UNE7-2	Q9UNE7;Q9UNE7-2	E3 ubiquitin-protein ligase CHIP	STUB1			-0.340333	1.03616		0.165789	-0.520181	-0.48358	2.0912	+	0.0344271	-0.80744	0.694325	2.19804	+	0.04661	1.09776	27.6203	27.4999	27.5979	26.9349	27.3501	27.4119	27.0059	27.2723	26.9891	27.3646	27.4121	27.262	27.7916	28.1822	28.1479
239	11	11	12.6	142.17	0	59.286	4967000000	113	O15118;O15118-2	O15118;O15118-2	Niemann-Pick C1 protein	NPC1			-0.340286	1.62037		0.136077	-0.570883	0.231764	1.38262		0.206297	0.400821	-0.193901	0.078495		0.688152	-0.141478	28.2248	28.0355	27.9947	27.8596	27.7394	27.6352	28.2876	28.3827	28.28	28.2891	26.399	26.6245	26.2748	28.1793	26.2768
1946	12	12	58.1	24.831	0	99.125	30476000000	342	P62906	P62906	60S ribosomal protein L10a	RPL10A	Predicted	+	-0.33999	1.5209		0.139763	-0.563594	-0.597973	2.77924	+	0.0237053	-1.0321	0.528538	1.71399		0.0593738	0.826397	30.663	30.5852	30.564	30.0672	30.3483	30.3767	29.8949	30.1448	29.9786	31.2415	31.0693	31.2215	31.4568	31.8853	31.7759
2063	91	73	68.8	187.89	0	323.31	56036000000	1010	Q00610-2;Q00610	Q00610-2;Q00610	Clathrin heavy chain 1	CLTC	Predicted		-0.339757	1.5202		0.139813	-0.563224	-0.431815	2.25691	+	0.0456364	-0.745351	0.377056	1.52276		0.109843	0.613746	30.8819	30.7869	30.8088	30.289	30.5656	30.6037	30.4002	30.519	30.263	32.9261	32.9239	32.9933	33.1358	33.5236	33.3152
395	4	3	8.9	58.304	0	12.675	274400000	13	O60291-4;O60291;O60291-3;O60291-2	O60291-4;O60291;O60291-3;O60291-2	E3 ubiquitin-protein ligase MGRN1	MGRN1			-0.33935	2.26245		0.119938	-0.603682	-0.363458	1.41068		0.0818918	-0.602572	NaN	NaN		NaN	NaN	24.386	24.3018	24.2992	23.9127	23.9595	24.0967	NaN	24.0948	23.8362	NaN	NaN	NaN	NaN	NaN	NaN
3106	4	4	7.2	91.783	0.00025465	7.0106	193530000	20	Q86X52	Q86X52	Chondroitin sulfate synthase 1	CHSY1			-0.338459	1.24109		0.153404	-0.538897	-0.272232	0.950592		0.176401	-0.429375	NaN	NaN		NaN	NaN	23.6018	23.9362	23.8541	23.3467	23.4181	23.6119	23.6461	23.3527	23.5766	NaN	NaN	NaN	NaN	NaN	NaN
3400	2	2	4.4	58.143	0.00024498	6.0404	1645100000	19	Q8TCT8	Q8TCT8	Signal peptide peptidase-like 2A	SPPL2A			-0.338128	1.76641		0.134399	-0.576942	-0.611913	2.37106	+	0.0238658	-1.01214	NaN	NaN		NaN	NaN	26.9037	27.1355	26.887	26.6164	26.6988	26.5967	26.4825	26.3578	26.2502	NaN	NaN	NaN	NaN	NaN	NaN
3803	44	40	31.1	241.41	0	175.07	3178900000	173	Q96N67-2;Q96N67-6;Q96N67;Q96N67-4;Q96N67-3;Q96N67-5;Q96N67-7	Q96N67-2;Q96N67-6;Q96N67;Q96N67-4;Q96N67-3;Q96N67-5	Dedicator of cytokinesis protein 7	DOCK7			-0.337664	0.894334		0.182877	-0.499475	-0.652246	2.57794	+	0.0261116	-1.09078	0.443586	0.584073		0.161005	0.528839	26.6706	26.7508	26.5774	25.9978	26.552	26.4361	25.8644	26.0221	26.1557	28.6206	28.3862	29.1375	29.4464	28.6478	29.3808
3739	9	9	36.2	34.854	0	37.528	817680000	36	Q96HP4	Q96HP4	Oxidoreductase NAD-binding domain-containing protein 1	OXNAD1	Known	+	-0.337611	0.671527		0.213119	-0.46365	-0.0111987	0.0387866		0.956501	-0.0187256	0.32026	1.47062		0.156734	0.532873	25.2424	25.3174	25.2654	24.4834	25.1738	25.1551	25.1096	25.4385	25.2436	26.1221	25.8278	25.8532	26.3276	26.215	26.2211
2923	3	3	20.6	21.198	0	19.406	2460700000	48	Q6UW68	Q6UW68	Transmembrane protein 205	TMEM205		+	-0.336981	3.60464		0.105103	-0.639036	-0.0816956	2.16708		0.648754	-0.158354	NaN	NaN		NaN	NaN	27.289	27.3206	27.3396	26.9473	26.9671	27.0239	27.2388	27.2422	27.2231	NaN	NaN	NaN	NaN	NaN	NaN
4195	19	19	66.7	37.948	0	122.67	6302000000	190	Q9H0P0;Q9H0P0-3;Q9H0P0-2;Q9H0P0-1	Q9H0P0;Q9H0P0-3;Q9H0P0-2;Q9H0P0-1	Cytosolic 5-nucleotidase 3A	NT5C3A			-0.336608	1.86993		0.134934	-0.580569	0.156825	1.1638		0.390635	0.278372	0.244945	1.57525		0.252703	0.42863	28.5029	28.4269	28.3424	28.0868	27.9753	28.2003	28.4947	28.6179	28.63	28.3843	28.1818	28.2406	28.5538	28.4366	28.551
1458	17	9	52.9	50.67	0	211.39	3672000000	87	P42167;P42167-2;P42167-3	P42167;P42167-2;P42167-3	Lamina-associated polypeptide 2, isoforms beta/gamma;Thymopoietin;Thymopentin	TMPO			-0.33655	1.63991		0.137694	-0.566884	-0.276782	1.54142		0.137646	-0.47493	0.785049	1.95253	+	0.0444952	1.16132	27.5698	27.6385	27.386	27.1958	27.0981	27.2908	27.1877	27.3005	27.2757	27.7481	27.4326	27.6577	28.1347	28.6502	28.4086
5020	5	5	23.6	26.832	0	13.211	509860000	26	Q9Y3B8;Q9Y3B8-2;Q9Y3B8-3	Q9Y3B8;Q9Y3B8-2;Q9Y3B8-3	Oligoribonuclease, mitochondrial	REXO2	Known	+	-0.336397	3.19212		0.110583	-0.628985	0.223747	2.43883		0.18755	0.416939	NaN	NaN		NaN	NaN	24.7823	24.81	24.8429	24.4157	24.5121	24.4983	24.997	25.0994	25.0101	NaN	NaN	NaN	NaN	NaN	NaN
3465	5	5	12.6	71.194	0	12.62	658060000	19	Q8WWK9-6;Q8WWK9-5;Q8WWK9;Q8WWK9-4	Q8WWK9-6;Q8WWK9-5;Q8WWK9	Cytoskeleton-associated protein 2	CKAP2			-0.336344	1.32563		0.151532	-0.543575	-0.467731	1.92887	+	0.0397241	-0.77115	NaN	NaN		NaN	NaN	25.378	25.4291	25.4809	24.8755	25.1369	25.2666	24.8303	25.1632	24.8913	NaN	NaN	NaN	NaN	NaN	NaN
3299	4	4	9.5	56.773	0	10.806	366510000	21	Q8NBN3-3;Q8NBN3;Q8NBN3-2	Q8NBN3-3;Q8NBN3;Q8NBN3-2	Transmembrane protein 87A	TMEM87A			-0.336029	1.50009		0.142391	-0.556661	-0.382573	1.59828		0.0684358	-0.627425	NaN	NaN		NaN	NaN	24.6286	24.3855	24.3145	24.0498	24.0837	24.187	24.1009	24.1282	23.9518	NaN	NaN	NaN	NaN	NaN	NaN
1640	12	9	78.7	23.482	0	174.28	11866000000	198	P51148;P51148-2	P51148;P51148-2	Ras-related protein Rab-5C	RAB5C			-0.333348	0.99667		0.175829	-0.507481	-0.153614	1.47572		0.386304	-0.280184	0.423073	1.81935		0.0800579	0.700665	29.3607	29.24	29.2465	28.6835	28.9541	29.2096	29.1043	29.185	29.0971	29.4368	29.4938	29.7308	29.8999	30.0753	29.9555
1240	13	11	24.2	83.597	0	41.328	721490000	43	P27986;P27986-4;P27986-5;P27986-3;P27986-2	P27986;P27986-4;P27986-5;P27986-3;P27986-2	Phosphatidylinositol 3-kinase regulatory subunit alpha	PIK3R1			-0.33331	1.07664		0.169033	-0.516338	-0.694946	3.13549	+	0.0197333	-1.20983	NaN	NaN		NaN	NaN	25.8153	25.8441	25.7156	25.2262	25.4382	25.7107	25.1298	25.1862	24.9741	NaN	NaN	NaN	NaN	NaN	NaN
3320	4	4	15.2	42.996	0	9.6128	337480000	9	Q8NCH0	Q8NCH0	Carbohydrate sulfotransferase 14	CHST14			-0.332334	0.716685		0.213111	-0.476059	NaN	NaN		NaN	NaN	NaN	NaN		NaN	NaN	24.923	24.539	24.7819	24.2342	24.597	NaN	NaN	NaN	24.6803	NaN	NaN	NaN	NaN	NaN	NaN
2673	11	11	16	103.96	0	41.321	1248900000	36	Q4KMQ2-3;Q4KMQ2;Q4KMQ2-2;Q4KMQ2-4	Q4KMQ2-3;Q4KMQ2;Q4KMQ2-2;Q4KMQ2-4	Anoctamin-6	ANO6			-0.330555	1.18929		0.162576	-0.524142	-0.256049	0.662073		0.228015	-0.379209	0.574403	3.31091	+	0.0491905	1.0342	26.3011	26.0412	25.9615	25.7104	25.6707	25.9311	25.7261	26.1282	25.6814	26.4852	26.5548	26.6297	27.0782	27.2009	27.1137
4291	7	7	34.1	26.56	0	16.983	1199100000	23	Q9H6E4	Q9H6E4	Coiled-coil domain-containing protein 134	CCDC134			-0.330004	1.1105		0.169219	-0.515838	-0.170281	2.63169		0.308226	-0.324506	NaN	NaN		NaN	NaN	26.4387	26.3685	26.3689	25.8193	26.0704	26.2964	26.228	26.2318	26.2055	NaN	NaN	NaN	NaN	NaN	NaN
1155	14	14	23.8	50.341	0	107.35	13948000000	201	P22307-4;P22307-7;P22307-8;P22307;P22307-6;P22307-2;P22307-3	P22307-4;P22307-7;P22307-8;P22307;P22307-6;P22307-2	Non-specific lipid-transfer protein	SCP2	Known		-0.329672	2.18532		0.131057	-0.58512	0.15622	1.01786		0.399947	0.273093	0.199404	1.01912		0.360152	0.33692	29.5999	29.5432	29.4447	29.131	29.1851	29.2827	29.6154	29.7962	29.6449	29.2896	29.0893	29.3434	29.3694	29.5358	29.4154
1920	20	20	54	49.03	0	133.04	5586900000	150	P62495;P62495-2	P62495;P62495-2	Eukaryotic peptide chain release factor subunit 1	ETF1			-0.329626	0.793208		0.202184	-0.476406	-0.331028	1.09843		0.113398	-0.515859	0.27903	0.833359		0.256451	0.425814	27.8894	27.7338	27.7713	27.1131	27.7419	27.5506	27.4013	27.7245	27.2756	29.4711	29.4156	29.0894	29.6969	29.7111	29.4052
2597	4	4	24	27.135	0	11.84	1078000000	19	Q16637-4;Q16637-2;Q16637-3;Q16637	Q16637-4;Q16637-2;Q16637-3;Q16637	Survival motor neuron protein	SMN1			-0.329589	0.220162		0.425513	-0.304196	NaN	NaN		NaN	NaN	NaN	NaN		NaN	NaN	25.6847	25.3829	27.1933	26.0692	25.5139	25.6891	NaN	NaN	26.6658	NaN	NaN	NaN	NaN	NaN	NaN
264	6	4	10.1	76.879	0	14.617	247390000	12	O15320-9;O15320-8;O15320-6;O15320-7;O15320-2;O15320-4;O15320-3;O15320-10;O15320;O15320-5;Q96PC5;A4FU28;Q8IX94;Q86UF2;P0CG41;A4D2H0;Q8IX95	O15320-9;O15320-8;O15320-6;O15320-7;O15320-2;O15320-4;O15320-3;O15320-10;O15320;O15320-5;Q96PC5;A4FU28	cTAGE family member 5;Melanoma inhibitory activity protein 2;cTAGE family member 9	CTAGE5;MIA2;CTAGE9			-0.329077	1.08851		0.173624	-0.524512	-0.0883255	0.442698		0.664287	-0.150809	NaN	NaN		NaN	NaN	24.1234	24.0442	24.2909	23.7083	NaN	23.9393	24.0705	24.1398	23.9833	NaN	NaN	NaN	NaN	NaN	NaN
4232	7	7	14.6	54.047	0	19.954	1297900000	20	Q9H2H9	Q9H2H9	Sodium-coupled neutral amino acid transporter 1	SLC38A1			-0.327776	0.905446		0.190206	-0.500652	-0.546216	2.42993	+	0.0266947	-0.925861	NaN	NaN		NaN	NaN	26.3782	26.4872	26.2017	25.8785	NaN	26.1774	25.769	25.8777	25.7818	NaN	NaN	NaN	NaN	NaN	NaN
1086	19	19	57.7	29.225	0	80.531	27976000000	307	P18124	P18124	60S ribosomal protein L7	RPL7			-0.327252	1.30145		0.158324	-0.529682	-0.596146	2.6399	+	0.023322	-1.01701	0.494857	1.21274		0.0770302	0.715379	30.3262	30.3739	30.0971	29.7761	30.0209	30.0184	29.6899	29.6688	29.6501	31.5941	31.3734	31.6469	31.6965	32.2671	32.1354
3260	2	2	11.8	36.382	0.00025387	6.9286	158870000	9	Q8N5Y8;Q8N5Y8-3	Q8N5Y8;Q8N5Y8-3	Mono [ADP-ribose] polymerase PARP16	PARP16			-0.325855	0.747636		0.21401	-0.474714	-0.257998	0.582251		0.244938	-0.375508	NaN	NaN		NaN	NaN	23.9674	23.6585	23.473	NaN	23.3602	23.3873	NaN	23.4168	23.4664	NaN	NaN	NaN	NaN	NaN	NaN
4517	6	6	28.8	31.127	0	22.884	620370000	25	Q9NUM4	Q9NUM4	Transmembrane protein 106B	TMEM106B			-0.325797	0.882622		0.193043	-0.484855	NaN	NaN		NaN	NaN	NaN	NaN		NaN	NaN	25.1043	25.6129	25.5334	25.1935	24.9625	25.1172	NaN	24.2422	NaN	NaN	NaN	NaN	NaN	NaN	NaN
3382	16	16	31.5	78.107	0	50.258	3666200000	60	Q8TBA6-2;Q8TBA6	Q8TBA6-2;Q8TBA6	Golgin subfamily A member 5	GOLGA5			-0.325093	0.95976		0.186591	-0.493617	-0.182836	0.59372		0.374734	-0.286728	NaN	NaN		NaN	NaN	27.8325	28.036	27.908	27.3565	27.5801	27.8646	27.5072	27.929	27.7917	NaN	NaN	NaN	NaN	NaN	NaN
4010	6	6	17.2	63.157	0	24.854	790350000	25	Q9BTX1-6;Q9BTX1-5;Q9BTX1-2;Q9BTX1;Q9BTX1-4;Q9BTX1-3	Q9BTX1-6;Q9BTX1-5;Q9BTX1-2;Q9BTX1;Q9BTX1-4;Q9BTX1-3	Nucleoporin NDC1	NDC1			-0.324898	1.88883		0.139806	-0.564028	-0.237448	1.14463		0.209291	-0.397364	NaN	NaN		NaN	NaN	25.8832	25.7429	25.8233	25.3659	25.5308	25.5779	25.4391	25.7434	25.5546	NaN	NaN	NaN	NaN	NaN	NaN
2765	7	7	27.1	42.089	0	50.963	785410000	23	Q5T2R2-3;Q5T2R2;Q5T2R2-2	Q5T2R2-3;Q5T2R2;Q5T2R2-2	Decaprenyl-diphosphate synthase subunit 1	PDSS1	Known	+	-0.324788	1.31347		0.160535	-0.527417	-0.429522	1.42769		0.058547	-0.69271	NaN	NaN		NaN	NaN	25.6093	25.3322	25.4219	24.9697	25.242	25.1774	NaN	25.1021	24.9478	NaN	NaN	NaN	NaN	NaN	NaN
1397	20	20	45.2	47.697	0	126.51	53271000000	573	P36578	P36578	60S ribosomal protein L4	RPL4			-0.324279	1.38719		0.157831	-0.532428	-0.50199	2.54868	+	0.0293455	-0.870344	0.46372	1.55031		0.074002	0.727072	31.5073	31.4523	31.4143	30.9254	31.207	31.2687	30.8294	31.0783	30.9603	31.9692	31.8259	31.9004	32.1346	32.5899	32.3623
4469	19	18	38.3	79.147	0	223.02	13342000000	230	Q9NRK6	Q9NRK6	ATP-binding cassette sub-family B member 10, mitochondrial	ABCB10	Known	+	-0.323462	5.14901		0.108193	-0.633387	0.510196	5.13142	+	0.0242477	0.986787	NaN	NaN		NaN	NaN	29.5946	29.6224	29.6277	29.2901	29.2971	29.2871	30.0987	30.1327	30.1439	NaN	NaN	NaN	NaN	NaN	NaN
4441	11	11	56.2	30.608	0	63.773	1799000000	82	Q9NQR4	Q9NQR4	Omega-amidase NIT2	NIT2	Predicted	+	-0.322826	1.40794		0.158029	-0.53199	-0.286884	2.11677		0.114134	-0.514403	0.188732	0.416947		0.458033	0.272451	26.695	26.684	26.554	26.1301	26.4418	26.3926	26.3398	26.4263	26.3063	27.0016	26.8592	26.852	26.8286	27.453	26.9974
1819	6	5	50.4	13.667	0	25.936	957600000	65	P60520	P60520	Gamma-aminobutyric acid receptor-associated protein-like 2	GABARAPL2			-0.322774	2.11789		0.136339	-0.571407	-0.595898	2.98484	+	0.0244723	-1.04573	0.604602	2.11415	+	0.0507234	0.972315	25.7568	25.9295	25.9107	25.5014	25.5151	25.6122	25.1858	25.2926	25.3309	25.7678	26.0107	26.116	26.4651	26.6883	26.5549
4851	8	8	47.1	24.347	0	118.83	6937900000	169	Q9UL25	Q9UL25	Ras-related protein Rab-21	RAB21			-0.322679	2.31808		0.134351	-0.579289	-0.0489896	0.55984		0.803036	-0.0909203	0.220659	0.8155		0.337433	0.352907	28.6951	28.6433	28.5813	28.3005	28.2463	28.405	28.5501	28.6161	28.6067	28.1067	28.1148	28.1064	28.1528	28.5719	28.2653
1331	10	10	65.6	21.863	0	196.47	13880000000	230	P32969	P32969	60S ribosomal protein L9	RPL9			-0.32252	0.992768		0.186558	-0.494402	-0.520484	2.82194	+	0.0266735	-0.917449	0.378606	1.23406		0.125551	0.587814	29.129	28.9167	28.948	28.4094	28.7499	28.8669	28.4602	28.4706	28.5014	30.8103	30.8111	30.8096	30.9669	31.4591	31.1409
2708	2	2	13.1	20.848	0.00025806	7.4304	2586000000	30	Q5BJF2	Q5BJF2	Transmembrane protein 97	TMEM97			-0.322191	1.75429		0.146551	-0.552921	-0.251867	1.36241		0.176509	-0.429536	NaN	NaN		NaN	NaN	27.6769	27.4919	27.4213	27.1545	27.2036	27.2655	27.1989	27.3025	27.3331	NaN	NaN	NaN	NaN	NaN	NaN
4925	15	15	33.4	56.625	0	51.332	4100500000	130	Q9UQB8-3;Q9UQB8-5;Q9UQB8-4;Q9UQB8-6;Q9UQB8-2;Q9UQB8	Q9UQB8-3;Q9UQB8-5;Q9UQB8-4;Q9UQB8-6;Q9UQB8-2;Q9UQB8	Brain-specific angiogenesis inhibitor 1-associated protein 2	BAIAP2			-0.321647	0.678203		0.22511	-0.449556	-1.58352	4.09878	+	0.0135	-2.65615	-0.154985	0.448827		0.50815	-0.238962	28.5942	28.2841	28.3804	27.7132	28.2344	28.3462	26.8023	26.8944	26.8115	25.607	25.7649	25.6182	25.4118	25.3299	25.7835
4423	6	6	68.6	14.96	0	78.641	7233000000	117	Q9NPJ3;Q9NPJ3-2	Q9NPJ3;Q9NPJ3-2	Acyl-coenzyme A thioesterase 13;Acyl-coenzyme A thioesterase 13, N-terminally processed	ACOT13	Predicted	+	-0.321325	2.47581		0.132465	-0.582723	0.252148	3.05308		0.136311	0.477223	-0.52518	3.50509	+	0.0511521	-0.963346	28.5276	28.4347	28.4929	28.1963	28.2177	28.0772	28.754	28.7277	28.7299	28.7294	28.8713	28.8386	28.2603	28.297	28.3065
1744	16	14	69.5	33.232	0	124.92	4332600000	141	P54920	P54920	Alpha-soluble NSF attachment protein	NAPA			-0.321205	2.06462		0.137478	-0.566648	-0.328332	2.42423		0.0800239	-0.592374	0.199045	0.915089		0.367463	0.330877	27.8472	27.8107	27.9264	27.4435	27.5348	27.6424	27.4488	27.5757	27.5749	28.3037	28.193	28.3451	28.3566	28.657	28.4254
1574	5	5	53.5	10.112	0	42.324	2643200000	42	P49458;P49458-2	P49458;P49458-2	Signal recognition particle 9 kDa protein	SRP9			-0.320765	1.74321		0.146835	-0.550213	-0.440108	1.84822	+	0.0490787	-0.726395	1.45079	1.11226	+	0.042	1.30304	26.733	26.5797	26.6848	26.2075	26.3964	26.4314	26.1113	26.4158	26.15	27.811	27.6085	27.7713	27.9852	29.9903	29.5677
1287	36	35	66.7	56.782	0	323.31	137410000000	948	P30101	P30101	Protein disulfide-isomerase A3	PDIA3	Predicted		-0.320507	1.3936		0.160294	-0.527801	-0.0840734	0.508756		0.669706	-0.146888	-0.0114695	0.0274157		0.952993	-0.0179094	33.051	33.0042	32.8796	32.5148	32.6228	32.8357	32.795	32.9658	32.9218	32.3302	32.2068	32.3924	32.0906	32.5359	32.2685
3295	5	5	20.9	33.843	0	19.605	2415200000	63	Q8NBJ7;Q8NBJ7-2;Q8NBJ7-5;Q8NBJ7-3;Q8NBJ7-4	Q8NBJ7;Q8NBJ7-2;Q8NBJ7-5;Q8NBJ7-3	Sulfatase-modifying factor 2	SUMF2			-0.320192	1.86619		0.143128	-0.5558	-0.213108	0.928267		0.267828	-0.350915	NaN	NaN		NaN	NaN	27.4453	27.2885	27.2819	26.9853	26.9455	27.1243	26.9579	27.2794	27.1391	25.7923	NaN	26.0322	NaN	NaN	NaN
4389	5	5	43.9	23.598	0	47.624	1751100000	62	Q9HCN8	Q9HCN8	Stromal cell-derived factor 2-like protein 1	SDF2L1			-0.319788	2.02605		0.139764	-0.562741	-0.0505632	0.29542		0.807529	-0.0888042	NaN	NaN		NaN	NaN	26.8406	26.6812	26.7787	26.3805	26.4155	26.5452	26.6305	26.8088	26.7096	NaN	NaN	NaN	NaN	NaN	NaN
506	32	32	43.6	88.884	0	212.51	3992400000	205	O75534;O75534-2;O75534-4;O75534-3	O75534;O75534-2;O75534-4;O75534-3	Cold shock domain-containing protein E1	CSDE1			-0.31907	0.566688		0.256652	-0.425325	-0.728412	1.61157	+	0.0236224	-1.03035	0.235547	1.52414		0.271027	0.412256	26.6699	26.2778	26.699	25.9347	26.1183	26.6364	25.5659	26.1045	25.7911	29.3763	29.5878	29.4408	29.6893	29.7691	29.6531
3648	13	13	42.9	52.623	0	160.33	8559400000	267	Q96CS3	Q96CS3	FAS-associated factor 2	FAF2			-0.318559	3.22823		0.123219	-0.598484	-0.0683346	0.622826		0.722408	-0.124393	0.415661	1.96849		0.0796985	0.701899	28.8137	28.7841	28.7407	28.4785	28.4129	28.4914	28.6522	28.7985	28.6828	28.8797	28.9854	29.054	29.2513	29.5177	29.3972
428	10	10	40.4	29.634	0	21.092	3092800000	59	O60762	O60762	Dolichol-phosphate mannosyltransferase subunit 1	DPM1			-0.318272	1.94508		0.142413	-0.556704	-0.0184498	0.258261		0.921169	-0.0349143	0.542523	1.61501		0.0584993	0.829852	27.4088	27.3828	27.4264	27.0947	26.9621	27.2063	27.337	27.4077	27.4179	27.1759	26.9785	27.2127	27.3941	27.808	27.7926
3105	8	8	23.1	54.498	0	53.547	3604600000	85	Q86X29-6;Q86X29-5;Q86X29-3;Q86X29-4;Q86X29;Q86X29-2	Q86X29-6;Q86X29-5;Q86X29-3;Q86X29-4;Q86X29;Q86X29-2	Lipolysis-stimulated lipoprotein receptor	LSR			-0.317713	1.0628		0.184944	-0.496048	-0.49958	1.75595	+	0.0354542	-0.795388	NaN	NaN		NaN	NaN	28.1618	28.0893	27.9946	27.5576	27.7254	28.0095	27.442	27.8181	27.4869	NaN	NaN	NaN	NaN	NaN	NaN
1935	6	6	64.8	17.04	0	145.16	12103000000	219	P62841	P62841	40S ribosomal protein S15	RPS15			-0.316607	0.999918		0.190448	-0.488195	-0.609392	1.83911	+	0.025124	-0.941114	0.449706	1.68568		0.0743922	0.723983	28.2768	28.2518	28.2647	27.6538	28.1292	28.0605	27.8566	27.7405	27.3681	30.7173	30.9231	30.731	31.0407	31.3708	31.3091
2383	11	11	38.7	32.233	0	49.102	3431200000	114	Q14165	Q14165	Malectin	MLEC	Predicted		-0.31658	1.68409		0.152865	-0.540806	-0.112537	0.702871		0.555523	-0.196386	0.0613391	0.116565		0.802246	0.0887226	27.4869	27.3958	27.2516	27.0128	27.0083	27.1634	27.2765	27.3028	27.2173	27.643	27.6783	28.1262	27.7235	28.094	27.8139
3644	11	11	54.7	32.236	0	83.653	5794400000	132	Q96CN7	Q96CN7	Isochorismatase domain-containing protein 1	ISOC1			-0.316529	0.177699		0.491627	-0.272925	-0.848658	0.796813	+	0.0293072	-0.887718	2.61684	1.62103	+	0.02575	2.11303	25.8287	NaN	24.6787	24.387	25.6875	24.7369	24.4358	24.1824	24.5969	28.6751	28.7413	27.8862	32.4153	30.4857	30.2522
435	5	5	27	19.258	0	12.69	1784000000	31	O60831	O60831	PRA1 family protein 2	PRAF2			-0.316243	0.984769		0.191606	-0.486123	0.107204	0.24491		0.647194	0.159298	NaN	NaN		NaN	NaN	26.6993	26.6536	26.3746	26.1892	26.1121	26.4775	26.55	26.9631	26.536	NaN	NaN	NaN	NaN	NaN	NaN
2112	3	2	5.2	75.663	0	9.3254	128890000	19	Q03519;Q03519-2	Q03519;Q03519-2	Antigen peptide transporter 2	TAP2			-0.316238	1.3971		0.16362	-0.522247	0.378879	2.07756		0.0612715	0.655289	NaN	NaN		NaN	NaN	22.9486	23.0423	22.9431	22.5034	22.6337	22.8482	23.2469	23.4903	23.3334	NaN	NaN	NaN	NaN	NaN	NaN
4747	4	4	16.5	35.867	0	9.8079	250540000	15	Q9UET6-2;Q9UET6	Q9UET6-2;Q9UET6	Putative tRNA (cytidine(32)/guanosine(34)-2-O)-methyltransferase	FTSJ1			-0.316034	1.60389		0.156375	-0.535384	-0.571701	2.69325	+	0.0241728	-0.985726	NaN	NaN		NaN	NaN	24.1439	24.1227	24.2302	23.7037	23.8501	23.995	23.7232	23.4709	23.5876	NaN	NaN	NaN	NaN	NaN	NaN
1532	8	8	36.6	37.251	0	19.47	550690000	29	P48059;P48059-4;P48059-2;P48059-5;P48059-3;P0CW19-2;Q7Z4I7-3;Q7Z4I7;Q7Z4I7-5;Q7Z4I7-2;Q7Z4I7-4	P48059;P48059-4;P48059-2;P48059-5;P48059-3	LIM and senescent cell antigen-like-containing domain protein 1	LIMS1			-0.315217	0.732974		0.224365	-0.452208	-0.473567	3.1071	+	0.0290813	-0.858567	NaN	NaN		NaN	NaN	24.7952	24.6495	24.6347	24.2632	24.1211	24.7496	24.2297	24.2087	24.2203	NaN	NaN	NaN	NaN	NaN	NaN
812	33	33	63.4	57.116	0	323.31	126860000000	1215	P07237	P07237	Protein disulfide-isomerase	P4HB	Known	+	-0.314987	2.33152		0.137814	-0.567347	-0.0978305	0.823737		0.602379	-0.176262	0.0555509	0.142926		0.808083	0.0862397	32.8927	32.8706	32.7684	32.4986	32.4804	32.6077	32.6821	32.8183	32.7378	32.1421	31.8909	31.9921	31.8236	32.2391	32.1291
3003	44	44	54.6	102.4	0	267.85	7603700000	257	Q7Z2K8;Q7Z2K8-2	Q7Z2K8;Q7Z2K8-2	G protein-regulated inducer of neurite outgrowth 1	GPRIN1			-0.314889	0.720198		0.225638	-0.449856	NaN	NaN		NaN	NaN	-0.27501	0.941327		0.248659	-0.431966	24.6161	24.8657	24.497	24.0366	24.6143	24.3833	NaN	NaN	NaN	30.8912	31.0752	31.2322	30.727	30.9775	30.6691
2935	32	32	40.1	114.05	0	121.8	3987900000	180	Q6WCQ1-3;Q6WCQ1;Q6WCQ1-2	Q6WCQ1-3;Q6WCQ1;Q6WCQ1-2	Myosin phosphatase Rho-interacting protein	MPRIP			-0.313931	0.738713		0.224843	-0.451771	-0.563757	1.64208	+	0.0290175	-0.858486	0.753251	2.60617	+	0.0464596	1.23247	27.5833	27.3345	27.3928	26.8035	27.1394	27.4258	26.8064	27.1375	26.6754	28.1464	28.3223	28.4344	28.9174	29.1669	29.0786
3619	16	16	38.1	64.244	0	70.812	7577500000	227	Q96AY3;Q96AY3-2	Q96AY3	Peptidyl-prolyl cis-trans isomerase FKBP10	FKBP10	Known	+	-0.313553	1.09711		0.186435	-0.494265	0.0502497	0.147563		0.829891	0.0801802	0.419292	1.34342		0.0958774	0.649095	28.9766	28.8343	28.6446	28.3555	28.4813	28.678	28.7352	29.0195	28.8516	26.8649	26.6193	26.9274	27.0128	27.3931	27.2635
3741	22	22	69.9	32.004	0	146.88	57073000000	497	Q96HS1;Q96HS1-2	Q96HS1;Q96HS1-2	Serine/threonine-protein phosphatase PGAM5, mitochondrial	PGAM5	Known	+	-0.311888	1.57843		0.160346	-0.527927	-0.116414	0.473599		0.567105	-0.191922	0.0176601	0.152437		0.925487	0.032508	31.455	31.4292	31.4049	30.941	31.1809	31.2316	31.1444	31.5075	31.2879	31.954	31.9664	31.9494	32.0204	31.8884	32.0139
3151	8	8	37	27.422	0	27.471	936040000	24	Q8IWL3	Q8IWL3	Iron-sulfur cluster co-chaperone protein HscB, mitochondrial	HSCB	Known	+	-0.311596	0.463352		0.28942	-0.394099	-0.241367	0.756506		0.23616	-0.373245	NaN	NaN		NaN	NaN	25.4457	25.456	25.789	24.8265	25.1828	25.7467	25.143	25.4598	25.3638	26.6319	25.9663	26.1012	NaN	NaN	25.9509
1537	7	4	24.2	39.802	0	9.2239	501140000	33	P48426-2;P48426	P48426-2;P48426	Phosphatidylinositol 5-phosphate 4-kinase type-2 alpha	PIP4K2A			-0.31093	1.41319		0.168834	-0.516088	-0.967801	2.71744	+	0.0082963	-1.63099	NaN	NaN		NaN	NaN	25.0931	25.2177	24.9793	24.934	24.6831	24.7402	NaN	24.1674	24.0904	NaN	NaN	NaN	NaN	NaN	NaN
3914	12	12	33.6	43.944	0	50.812	994130000	57	Q99816;Q99816-2	Q99816;Q99816-2	Tumor susceptibility gene 101 protein	TSG101			-0.309712	0.714844		0.232236	-0.443712	-0.382622	1.4286		0.0755567	-0.612577	NaN	NaN		NaN	NaN	24.475	24.7303	24.8265	24.0408	24.5984	24.4634	24.16	24.3633	24.3605	NaN	NaN	NaN	NaN	NaN	NaN
1610	18	9	59.1	42.142	0	80.983	3629900000	97	P50148	P50148	Guanine nucleotide-binding protein G(q) subunit alpha	GNAQ			-0.309401	0.615797		0.255195	-0.426379	-0.0539125	0.107187		0.832954	-0.0791017	0.44901	2.63696		0.0632272	0.794672	27.4716	27.2201	26.9959	26.7111	26.7723	27.276	26.9658	27.3766	27.1835	28.5775	28.6252	28.5886	28.9213	29.0888	29.1282
2232	5	5	28.5	26.132	0.0002588	7.5295	409050000	7	Q12981;Q12981-1;Q12981-2;Q12981-3	Q12981;Q12981-1;Q12981-2;Q12981-3	Vesicle transport protein SEC20	BNIP1	Known		-0.308841	0.941372		0.208732	-0.482597	-0.156492	0.434023		0.462453	-0.239139	NaN	NaN		NaN	NaN	24.7495	24.8627	24.6865	NaN	24.2922	24.6226	24.4035	24.8907	24.535	NaN	NaN	NaN	NaN	NaN	NaN
152	35	34	60.7	73.243	0	221.68	16693000000	375	O00571;O00571-2;O15523-2;O15523;O15523-3;Q9NQI0-3;Q9NQI0-2;Q9NQI0-4;Q9NQI0	O00571;O00571-2;O15523-2;O15523	ATP-dependent RNA helicase DDX3X;ATP-dependent RNA helicase DDX3Y	DDX3X;DDX3Y			-0.308788	1.49697		0.167819	-0.51856	-0.421193	2.88412	+	0.0417786	-0.762396	0.256907	1.15733		0.257397	0.42507	29.3898	29.3457	29.319	28.8567	29.1248	29.1466	28.8531	29.019	28.9188	30.9351	31.0141	31.054	31.0635	31.3812	31.3291
926	39	38	55.7	72.332	0	323.31	169610000000	1368	P11021	P11021	78 kDa glucose-regulated protein	HSPA5	Predicted		-0.308324	1.55012		0.164962	-0.521145	-0.0999896	0.691935		0.601281	-0.176721	-0.194754	0.803269		0.385711	-0.318179	33.4193	33.298	33.2586	32.8932	32.9972	33.1606	33.1603	33.3108	33.2048	32.5098	32.3368	32.4996	32.1116	32.4394	32.2108
5039	6	6	42.9	12.254	0	26.755	6583300000	92	Q9Y3U8	Q9Y3U8	60S ribosomal protein L36	RPL36			-0.307632	0.617614		0.256748	-0.425035	-0.581361	2.01442	+	0.0262842	-0.930076	0.479021	0.988968		0.0907942	0.65881	27.3838	27.2691	27.4821	26.7077	27.052	27.4524	26.595	26.9685	26.8273	30.0441	29.8357	30.0059	30.03	30.772	30.5207
3512	5	5	22	56.777	0	32.852	1079300000	48	Q92575	Q92575	UBX domain-containing protein 4	UBXN4			-0.307469	0.922182		0.209457	-0.468873	0.319429	1.33445		0.110008	0.521946	NaN	NaN		NaN	NaN	26.1772	26.015	25.8168	25.6883	25.4987	25.8996	26.3992	26.309	26.2591	NaN	NaN	NaN	NaN	NaN	NaN
517	13	13	41.8	47.744	0	57.942	3580100000	93	O75648;O75648-2;O75648-4;O75648-3;O75648-5	O75648;O75648-2;O75648-4	Mitochondrial tRNA-specific 2-thiouridylase 1	TRMU	Known	+	-0.307239	2.7477		0.137596	-0.567307	-0.155224	1.65033		0.376062	-0.285924	-0.172218	0.287406		0.517064	-0.23211	27.4841	27.554	27.4396	27.1529	27.2343	27.1688	27.2983	27.3244	27.3893	27.6464	28.1044	28.0547	27.7207	27.4507	28.1175
4158	8	8	18.9	54.139	0	88.891	3190900000	62	Q9C0H2-2;Q9C0H2;Q9C0H2-4;Q9C0H2-3	Q9C0H2-2;Q9C0H2;Q9C0H2-4;Q9C0H2-3	Protein tweety homolog 3	TTYH3			-0.306883	0.606119		0.258108	-0.422162	-0.285025	0.500571		0.226846	-0.380651	-0.346673	1.65377		0.127532	-0.582109	26.9324	27.4335	26.7242	26.5868	26.7039	26.8787	26.6003	27.0099	26.6249	28.8034	29.015	28.6968	28.4535	28.5194	28.5023
3038	40	40	14.1	480.19	0	136.09	1574500000	119	Q7Z6Z7-2;Q7Z6Z7-3;Q7Z6Z7	Q7Z6Z7-2;Q7Z6Z7-3;Q7Z6Z7	E3 ubiquitin-protein ligase HUWE1	HUWE1			-0.306253	0.424745		0.308431	-0.379122	-0.755335	0.686701	+	0.0430483	-0.754989	0.864885	0.966394	+	0.0497284	0.940939	25.7313	25.6791	25.4743	24.7612	25.4295	25.7753	24.0715	25.7748	24.7725	27.2816	27.9578	27.2187	27.7723	28.969	28.3114
1176	19	19	21.7	133.28	0	74.316	1212500000	66	P23458;O60674	P23458	Tyrosine-protein kinase JAK1	JAK1			-0.306116	3.02459		0.13643	-0.572147	-0.896281	4.53945	+	0.0088125	-1.65324	0.545563	1.16394		0.0687288	0.757299	26.0429	26.0605	26.1208	25.7649	25.7257	25.8152	25.209	25.1088	25.2175	25.9023	26.5656	26.3332	26.7331	27.0189	26.6858
4253	11	11	33.9	31.791	0	30.904	7318400000	113	Q9H3N1	Q9H3N1	Thioredoxin-related transmembrane protein 1	TMX1			-0.305747	1.7565		0.16013	-0.52864	-0.0796299	0.543507		0.681933	-0.141003	0.00117302	0.00326914		0.986848	0.00190021	28.9021	28.8732	28.7297	28.462	28.4822	28.6435	28.7076	28.8276	28.7309	27.3146	27.1837	27.2615	27.3598	27.3709	27.0326
2036	6	6	23	23.466	0	50.293	8626700000	133	P84098	P84098	60S ribosomal protein L19	RPL19			-0.305159	0.81547		0.223075	-0.453272	-0.545751	2.27435	+	0.0270582	-0.910846	0.457833	1.3637		0.0811583	0.697025	28.5854	28.8257	28.6523	28.0801	28.4566	28.6114	28.0861	28.2786	28.0616	29.4226	29.619	29.7477	29.8083	30.2171	30.1375
2737	10	10	12.1	110.24	0	27.649	712740000	25	Q5M775-4;Q5M775;Q5M775-5;Q5M775-3;Q5M775-2	Q5M775-4;Q5M775;Q5M775-5;Q5M775-3;Q5M775-2	Cytospin-B	SPECC1			-0.304399	1.02147		0.203078	-0.475703	-0.736752	2.37737	+	0.0222292	-1.17803	0.348722	0.740197		0.192804	0.486975	25.2951	25.2747	25.1098	24.7245	24.8827	25.1592	24.2768	24.6497	24.5428	26.1441	25.9425	25.738	26.0073	26.6288	26.2347
446	18	18	39	82.64	0	108.84	7614300000	192	O75027;O75027-2;O75027-3	O75027;O75027-2;O75027-3	ATP-binding cassette sub-family B member 7, mitochondrial	ABCB7	Known	+	-0.304372	3.23965		0.135813	-0.573604	0.558409	3.21874	+	0.0241032	1.00271	-0.241316	1.41551		0.267465	-0.416501	28.5786	28.5006	28.4782	28.2092	28.2136	28.2214	29.1686	29.0586	29.0053	28.502	28.3883	28.4893	28.1654	28.1315	28.3587
4363	5	5	27.2	17.201	0	14.005	1925900000	41	Q9HBL7	Q9HBL7	Plasminogen receptor (KT)	PLGRKT	Known	+	-0.303807	0.170726		0.51093	-0.262734	0.280274	0.840897		0.180742	0.436099	NaN	NaN		NaN	NaN	26.577	NaN	26.7383	26.8157	26.9032	25.3426	26.85	27.1379	26.8259	NaN	NaN	NaN	NaN	NaN	NaN
4468	16	16	46	59.573	0	102.35	3636300000	93	Q9NRG9;Q9NRG9-2	Q9NRG9;Q9NRG9-2	Aladin	AAAS			-0.303458	1.87081		0.158467	-0.530624	-0.0188662	0.0962538		0.92512	-0.0330913	0.105261	0.0646191		0.783933	0.0986542	27.7682	27.7754	27.7055	27.3457	27.4162	27.5768	27.6122	27.8423	27.7381	26.2244	25.8355	27.6397	26.5925	26.9523	26.4705
3609	20	20	33.5	77.86	0	121.05	3050000000	117	Q96AC1;Q96AC1-3;Q96AC1-2;Q9BQL6-4;Q9BQL6-2;Q9BQL6	Q96AC1;Q96AC1-3;Q96AC1-2	Fermitin family homolog 2	FERMT2			-0.303369	0.343839		0.348529	-0.35056	-0.417065	0.61423		0.113002	-0.518192	0.546707	1.60562		0.0576033	0.833391	26.379	25.9964	26.1463	25.2361	25.9398	26.4357	25.3478	26.3021	25.6205	28.7154	29.0377	28.8666	29.1708	29.5236	29.5655
4221	21	16	57.7	61.174	0	80.445	5262400000	100	Q9H223	Q9H223	EH domain-containing protein 4	EHD4			-0.303058	0.996979		0.206937	-0.471633	-0.732215	3.68113	+	0.013037	-1.31511	-0.0266838	0.0411008		0.915288	-0.0370115	28.4762	28.4102	28.3812	27.8764	28.1216	28.3605	27.6028	27.6947	27.7735	27.1306	27.6069	27.8066	27.333	27.4771	27.6539
3155	24	22	36.5	94.198	0	101.29	4241100000	99	Q8IWT6	Q8IWT6	Volume-regulated anion channel subunit LRRC8A	LRRC8A			-0.302486	1.42504		0.176397	-0.505168	-0.604017	0.97158	+	0.0419291	-0.763368	0.242256	2.07189		0.239461	0.440323	27.6811	27.6327	27.904	27.4227	27.3534	27.5343	27.6186	27.1352	26.652	28.3848	28.4422	28.3061	28.5645	28.6718	28.6236
4688	31	31	28.4	152.45	0	202.23	9344500000	283	Q9P2E9;Q9P2E9-3;Q8N4C6-6;Q8N4C6-11;Q8N4C6-4;Q8N4C6-9;Q8N4C6-2;Q8N4C6;Q8N4C6-5;Q8N4C6-10;Q8N4C6-7	Q9P2E9;Q9P2E9-3	Ribosome-binding protein 1	RRBP1			-0.301767	1.8269		0.161261	-0.526031	-0.380234	3.00813		0.0535204	-0.69903	0.0401192	0.0163851		0.928913	0.0305726	29.2974	29.4284	29.3171	28.937	29.0512	29.1493	28.9656	28.9399	28.9966	27.4034	25.1328	26.9955	27.1843	26.6952	25.7725
3338	4	4	5.5	128.56	0.00043573	3.5503	319180000	6	Q8NEN9	Q8NEN9	PDZ domain-containing protein 8	PDZD8			-0.301649	0.7777		0.233125	-0.452909	NaN	NaN		NaN	NaN	NaN	NaN		NaN	NaN	24.8829	24.5968	24.4739	24.2749	24.4242	NaN	23.8286	NaN	NaN	NaN	NaN	NaN	NaN	NaN	NaN
3873	6	6	17.1	45.467	0	19.28	1900300000	79	Q99519	Q99519	Sialidase-1	NEU1			-0.30123	1.52712		0.174394	-0.509644	-0.185052	1.37486		0.302389	-0.328784	NaN	NaN		NaN	NaN	27.0366	27.0021	27.0805	26.9117	26.6232	26.6806	26.7418	26.9384	26.8838	NaN	NaN	NaN	NaN	NaN	NaN
4914	21	21	44.7	74.712	0	111.65	2636800000	90	Q9UPT5-2;Q9UPT5-5;Q9UPT5-1;Q9UPT5-6;Q9UPT5;Q9UPT5-4	Q9UPT5-2;Q9UPT5-5;Q9UPT5-1;Q9UPT5-6;Q9UPT5	Exocyst complex component 7	EXOC7			-0.30025	1.99094		0.158343	-0.530846	-0.48591	2.86048	+	0.0293812	-0.865545	0.310535	0.905858		0.208113	0.470529	27.1524	26.993	27.1422	26.73	26.787	26.8699	26.6442	26.6424	26.5432	27.5384	27.7655	27.529	27.7049	28.1836	27.8761
2148	31	31	56.6	66.022	0	323.31	44857000000	560	Q07065	Q07065	Cytoskeleton-associated protein 4	CKAP4			-0.300248	2.45845		0.149844	-0.547327	0.191527	1.67838		0.273519	0.347052	-0.00156021	0.00455219		0.985422	-0.00254845	31.3966	31.4033	31.3249	31.0234	31.0436	31.157	31.4936	31.6498	31.5559	29.5598	29.4787	29.5471	29.3555	29.7303	29.4951
4559	6	6	39.3	24.171	0	23.216	578500000	11	Q9NWM8	Q9NWM8	Peptidyl-prolyl cis-trans isomerase FKBP14	FKBP14			-0.30024	1.29682		0.186234	-0.493404	-0.282398	1.16732		0.151989	-0.460116	NaN	NaN		NaN	NaN	24.6903	24.8139	24.9698	24.4261	24.6656	24.4817	24.4878	24.6998	24.4392	NaN	NaN	NaN	NaN	NaN	NaN
1098	16	14	34.9	97.039	0	323.31	9740100000	201	P19022-2;P19022	P19022-2;P19022	Cadherin-2	CDH2			-0.299762	0.699781		0.249123	-0.431119	-0.303244	1.90667		0.104034	-0.531903	0.463193	2.03785		0.0641859	0.77442	28.792	28.6818	28.795	28.1287	28.448	28.7927	28.3869	28.5715	28.4006	29.5694	29.6911	29.7034	29.9441	30.2324	30.1769
2337	7	5	46.4	21.569	0	14.324	787180000	19	Q13636	Q13636	Ras-related protein Rab-31	RAB31			-0.299446	2.01893		0.158539	-0.530719	0.233805	1.28772		0.207341	0.399581	NaN	NaN		NaN	NaN	25.5743	25.6624	25.6843	25.3998	25.2315	25.3914	25.9423	25.962	25.7181	NaN	NaN	NaN	NaN	NaN	NaN
281	2	2	10.2	38.365	0.00023702	5.2212	314270000	34	O15533-4;O15533-2;O15533;O15533-3	O15533-4;O15533-2;O15533;O15533-3	Tapasin	TAPBP			-0.298854	1.08471		0.203772	-0.474727	0.450036	1.78919	+	0.048216	0.734445	NaN	NaN		NaN	NaN	24.318	24.1176	24.2605	24.065	23.704	24.0305	24.515	24.8466	24.6845	NaN	NaN	NaN	NaN	NaN	NaN
2400	17	17	83.6	36.876	0	236.62	15856000000	222	Q14257;Q14257-2	Q14257;Q14257-2	Reticulocalbin-2	RCN2	Known		-0.298761	1.26856		0.190107	-0.489375	0.194014	0.967305		0.305707	0.326653	0.293952	0.744515		0.248851	0.431515	29.9391	29.775	29.7446	29.4178	29.4392	29.7054	29.8853	30.1342	30.0212	28.6769	28.7819	28.8779	28.73	29.26	29.2285
1170	13	13	53.7	23.742	0	114.66	69107000000	559	P23284	P23284	Peptidyl-prolyl cis-trans isomerase B	PPIB	Predicted		-0.298061	2.42843		0.151545	-0.542785	-0.0961323	1.05839		0.60016	-0.177143	0.0334797	0.114544		0.875631	0.055236	31.9387	31.9036	31.841	31.5455	31.5684	31.6752	31.7482	31.857	31.7896	31.7363	31.5821	31.8495	31.6255	31.8759	31.767
3843	12	10	24.3	74.324	0	40.805	1341000000	59	Q96SB4;Q96SB4-4;Q96SB4-3;Q9UPE1-2;Q9UPE1-3;Q9UPE1-4;Q9UPE1	Q96SB4;Q96SB4-4;Q96SB4-3	SRSF protein kinase 1	SRPK1			-0.296785	0.686269		0.255232	-0.425956	-0.649556	1.50873	+	0.0263342	-0.929174	0.574134	0.581165		0.11233	0.610516	26.3449	26.1802	26.4215	25.6573	26.145	26.2539	25.3249	25.9647	25.7084	26.3714	25.4451	25.9652	25.974	27.1622	26.3679
2146	8	8	42.6	21.634	0	57.845	18138000000	142	Q07020;Q07020-2	Q07020;Q07020-2	60S ribosomal protein L18	RPL18			-0.296739	0.682957		0.25671	-0.425393	-0.462807	1.89549	+	0.0416475	-0.761424	0.153481	0.252347		0.563555	0.207043	29.6484	29.506	29.5028	28.8928	29.3302	29.5439	28.9701	29.2807	29.0179	31.022	31.0522	31.0452	30.7262	31.5309	31.3228
3	23	23	38.3	98.9	0	93.728	4362700000	129	A0FGR8-2;A0FGR8;A0FGR8-6;A0FGR8-4;A0FGR8-5	A0FGR8-2;A0FGR8;A0FGR8-6;A0FGR8-4	Extended synaptotagmin-2	ESYT2			-0.296061	1.57479		0.176926	-0.504876	-0.147517	1.05063		0.423213	-0.260645	0.141773	0.0734988		0.732276	0.120475	27.9035	27.7231	27.8621	27.4034	27.5711	27.6261	27.6466	27.7562	27.6434	26.7964	27.9764	28.1654	28.0659	28.5239	26.7738
4286	5	5	26.3	40.05	0	21.987	829680000	22	Q9H5K3	Q9H5K3	Protein O-mannose kinase	POMK			-0.295973	1.60389		0.176271	-0.506316	-0.220009	1.55647		0.217986	-0.389344	NaN	NaN		NaN	NaN	25.8851	25.9044	25.8277	25.4222	25.6087	25.6984	25.7734	25.6034	25.5804	NaN	NaN	NaN	NaN	NaN	NaN
2271	18	16	49.6	52.164	0	205.04	9422800000	267	Q13283;Q13283-2	Q13283	Ras GTPase-activating protein-binding protein 1	G3BP1			-0.295673	0.62899		0.266	-0.415464	-0.518864	2.40553	+	0.0289619	-0.884273	0.350811	1.36095		0.135534	0.565425	28.8007	28.8104	28.8062	28.0871	28.7078	28.7354	28.2552	28.4505	28.1551	29.6574	29.6829	29.7613	29.8333	30.2306	30.0902
2747	2	2	4.3	53.67	0.0046805	2.4312	219320000	3	Q5SRI9	Q5SRI9	Glycoprotein endo-alpha-1,2-mannosidase	MANEA			-0.295602	2.08738		0.160444	-0.527286	-0.269671	1.45986		0.151461	-0.460386	NaN	NaN		NaN	NaN	24.0461	23.9946	23.8486	23.6614	23.6928	23.6482	23.613	23.8155	23.6516	NaN	NaN	NaN	NaN	NaN	NaN
406	8	7	63	18.762	0	27.904	2800100000	79	O60493;O60493-2;O60493-4;O60493-3	O60493;O60493-2;O60493-4;O60493-3	Sorting nexin-3	SNX3			-0.295356	1.61689		0.176037	-0.506098	-0.718395	3.30308	+	0.0157	-1.26118	0.321732	1.46809		0.154924	0.534735	27.2352	27.3975	27.4389	27.0466	26.9736	27.1654	26.5893	26.697	26.6301	27.4743	27.4552	27.605	27.6535	27.934	27.9123
1426	14	14	46.7	50.8	0	163.42	19405000000	214	P39656;P39656-3;P39656-2	P39656;P39656-3;P39656-2	Dolichyl-diphosphooligosaccharide--protein glycosyltransferase 48 kDa subunit	DDOST			-0.29471	1.6269		0.175968	-0.505671	-0.0929432	0.542641		0.640191	-0.161453	0.0686715	0.191497		0.762104	0.107739	30.2601	30.0773	30.2616	29.8284	29.8729	30.0136	30.0185	30.1614	30.1403	29.2717	28.931	29.3057	29.134	29.3647	29.2159
831	16	8	39	60.801	0	75.387	1981000000	40	P07947	P07947	Tyrosine-protein kinase Yes	YES1			-0.294586	1.03466		0.213219	-0.464858	-0.0672696	0.0793322		0.818062	-0.0841876	0.28105	1.39904		0.205503	0.473427	26.7263	26.3271	26.5733	26.198	26.3785	26.1664	26.425	26.9752	26.0247	27.1619	27.3085	27.2889	27.4204	27.6924	27.4896
4866	14	14	17.2	140.3	0	36.731	2123400000	48	Q9ULJ8-4;Q9ULJ8-5;Q9ULJ8-3;Q9ULJ8;Q9ULJ8-2	Q9ULJ8-4;Q9ULJ8-5;Q9ULJ8-3;Q9ULJ8	Neurabin-1	PPP1R9A			-0.294332	0.713565		0.254239	-0.427515	-0.554487	2.46908	+	0.0251934	-0.941234	0.473073	1.11545		0.0863797	0.676356	26.7162	26.9225	26.8518	26.1897	26.7845	26.6334	26.3759	26.2985	26.1528	27.3727	27.5619	27.5086	27.5976	28.2527	28.0123
663	3	3	13.2	25.817	0.00024925	6.4262	575200000	19	O95772-2;O95772	O95772-2;O95772	MLN64 N-terminal domain homolog	STARD3NL			-0.294074	1.86885		0.168933	-0.516137	-0.213949	2.1875		0.210558	-0.395393	NaN	NaN		NaN	NaN	25.259	25.2881	25.3641	24.9278	24.9692	25.132	25.0556	25.1422	25.0716	NaN	NaN	NaN	NaN	NaN	NaN
1234	15	15	61	35.554	0	131.22	3670800000	96	P27695	P27695	DNA-(apurinic or apyrimidinic site) lyase;DNA-(apurinic or apyrimidinic site) lyase, mitochondrial	APEX1	Known		-0.293763	1.08582		0.209758	-0.468377	0.098081	0.408432		0.63517	0.162942	0.856878	1.66686	+	0.0457822	1.16746	26.8373	26.8232	26.7352	26.5324	26.2792	26.703	27.0706	26.8834	26.736	28.7434	28.5335	28.717	29.1297	29.9071	29.5278
1237	20	20	69.3	48.141	0	323.31	153480000000	1109	P27797	P27797	Calreticulin	CALR	Known		-0.293648	1.51751		0.183089	-0.49821	0.0400225	0.317761		0.846001	0.0725599	0.0296466	0.077128		0.897367	0.0466656	33.1481	33.0081	33.0535	32.6856	32.7087	32.9343	33.0591	33.166	33.1046	32.3498	32.1895	32.4272	32.1899	32.5761	32.2895
779	12	12	53.9	34.273	0	246.11	29263000000	332	P05388;P05388-2;Q8NHW5	P05388;P05388-2;Q8NHW5	60S acidic ribosomal protein P0;60S acidic ribosomal protein P0-like	RPLP0;RPLP0P6	Predicted		-0.292537	0.699607		0.2572	-0.42357	-0.429614	1.35089		0.0608963	-0.662298	0.46104	1.62546		0.0733293	0.732179	30.1878	30.2342	29.9628	29.5093	29.9093	30.0886	29.4749	29.8982	29.7229	31.5594	31.57	31.6386	31.8183	32.2571	32.0757
2404	19	18	58.4	44.049	0	135.88	7550300000	208	Q14344;Q14344-2	Q14344;Q14344-2	Guanine nucleotide-binding protein subunit alpha-13	GNA13			-0.292255	1.21828		0.201886	-0.476987	-0.444492	2.29837	+	0.0410896	-0.766971	0.345636	1.52866		0.132402	0.571901	28.5621	28.5955	28.6754	28.1077	28.388	28.4605	28.19	28.278	28.0316	29.4581	29.454	29.5725	29.6549	29.9815	29.885
3779	10	10	30.9	58.355	0	46.666	2195200000	54	Q96KA5-2;Q96KA5	Q96KA5-2;Q96KA5	Cleft lip and palate transmembrane protein 1-like protein	CLPTM1L			-0.291456	2.74247		0.15278	-0.540168	-0.101884	0.515492		0.607962	-0.173654	0.43129	0.946449		0.11531	0.604722	26.7836	26.7754	26.7583	26.4503	26.5582	26.4345	26.6099	26.841	26.5608	26.7117	26.6429	27.1792	27.2212	27.5245	27.0819
2047	8	7	38.7	38.006	0	30.476	2509400000	42	P98172	P98172	Ephrin-B1	EFNB1			-0.290478	0.889047		0.230204	-0.445329	-1.3748	2.28406	+	0.0111429	-1.83729	NaN	NaN		NaN	NaN	27.7139	27.6523	27.5312	27.0735	27.3933	27.5591	26.3961	26.5908	25.786	NaN	NaN	25.8653	25.9777	NaN	26.2598
3119	7	6	15.6	53.543	0	14.42	1041600000	14	Q86YB8	Q86YB8	ERO1-like protein beta	ERO1LB			-0.29014	1.14993		0.209714	-0.468986	0.707136	2.36434	+	0.0241942	1.13804	NaN	NaN		NaN	NaN	25.9093	25.9301	25.6805	25.4409	25.4853	25.7233	26.3661	26.6583	26.617	NaN	NaN	NaN	NaN	NaN	NaN
691	6	6	24.9	26.724	0	7.9859	918450000	13	O96011-2;O96011	O96011-2;O96011	Peroxisomal membrane protein 11B	PEX11B		+	-0.289882	1.79824		0.176506	-0.50663	-0.303808	2.02514		0.100644	-0.537813	NaN	NaN		NaN	NaN	25.9781	25.7909	25.8225	25.4877	25.6209	25.6132	25.5983	25.5795	25.5022	NaN	NaN	NaN	NaN	NaN	NaN
2973	49	49	70.4	102	0	323.31	31913000000	582	Q7KZF4	Q7KZF4	Staphylococcal nuclease domain-containing protein 1	SND1	Predicted	+	-0.288589	1.4564		0.190251	-0.487475	-0.300259	1.62829		0.114796	-0.513891	0.277247	1.13274		0.229573	0.450731	30.7545	30.6115	30.6274	30.245	30.3612	30.5213	30.2305	30.473	30.389	31.3352	31.2826	31.3461	31.4218	31.8101	31.5638
4292	4	4	24.1	29.395	0	17.203	1042000000	16	Q9H6H4;Q9H6H4-2	Q9H6H4	Receptor expression-enhancing protein 4	REEP4			-0.288478	0.776717		0.25089	-0.42981	0.132797	0.283039		0.564903	0.192722	NaN	NaN		NaN	NaN	26.0763	26.1176	25.7854	25.4634	25.7181	25.9324	26.3404	25.8188	26.2186	NaN	NaN	NaN	NaN	NaN	NaN
4396	9	9	31.6	46.491	0	74.492	1488700000	30	Q9HD23-2;Q9HD23;Q9HD23-4;Q9HD23-3	Q9HD23-2;Q9HD23;Q9HD23-4	Magnesium transporter MRS2 homolog, mitochondrial	MRS2	Known	+	-0.288322	1.57717		0.186672	-0.493704	0.665194	5.98474	+	0.0139437	1.29524	NaN	NaN		NaN	NaN	26.2989	26.3343	26.2959	25.8578	26.0777	26.1286	26.9764	26.9839	26.9643	NaN	NaN	NaN	NaN	NaN	NaN
2049	5	5	47.8	17.17	0	65.448	1981100000	41	P98179	P98179	RNA-binding protein 3	RBM3			-0.287706	1.14439		0.212683	-0.465369	-0.0724392	0.404609		0.719506	-0.125785	0.821538	1.4802	+	0.0447465	1.08492	26.4066	26.5405	26.4513	25.9715	26.21	26.3538	26.459	26.4582	26.2639	27.274	27.1435	27.3447	27.7947	28.5751	27.857
3913	5	5	12.7	50.219	0	19.336	1923100000	62	Q99808;Q99808-2	Q99808;Q99808-2	Equilibrative nucleoside transporter 1	SLC29A1			-0.287618	1.02673		0.22181	-0.455433	-0.558639	1.90806	+	0.0283487	-0.888081	NaN	NaN		NaN	NaN	27.1896	27.3697	26.9749	26.7672	26.914	26.9901	26.6389	26.7127	26.5067	NaN	NaN	NaN	NaN	NaN	NaN
2878	4	4	6.1	105.52	0	13.855	178690000	8	Q6P179-3;Q6P179;Q6P179-2	Q6P179-3;Q6P179	Endoplasmic reticulum aminopeptidase 2	ERAP2			-0.286911	0.665792		0.271239	-0.419766	0.396713	1.86995		0.0591167	0.667827	NaN	NaN		NaN	NaN	23.6054	23.3877	23.3517	22.957	NaN	23.3657	23.8313	23.9386	23.765	NaN	NaN	NaN	NaN	NaN	NaN
1149	29	29	57.2	83.134	0	270.99	26346000000	355	P22033	P22033	Methylmalonyl-CoA mutase, mitochondrial	MUT	Known	+	-0.285936	3.92243		0.147577	-0.550673	0.302647	3.4142		0.0852692	0.573781	0.023833	0.198103		0.902949	0.0436278	30.4482	30.4452	30.4384	30.196	30.1409	30.1372	30.6991	30.7937	30.747	29.7034	29.8524	29.7896	29.829	29.7733	29.8146
2766	12	12	27.8	65.523	0	46.936	2109900000	70	Q5T2T1;Q5T2T1-2	Q5T2T1;Q5T2T1-2	MAGUK p55 subfamily member 7	MPP7			-0.285933	1.42773		0.196572	-0.482031	-0.758877	3.6781	+	0.0107931	-1.3577	NaN	NaN		NaN	NaN	27.4142	27.385	27.293	26.9321	27.0733	27.229	26.6444	26.6582	26.513	NaN	NaN	NaN	NaN	NaN	NaN
4962	3	2	4.2	120.63	0	9.096	213620000	10	Q9Y2D5-6;Q9Y2D5-4;Q9Y2D5;Q9Y2D5-5;Q9Y2D5-7	Q9Y2D5-6;Q9Y2D5-4;Q9Y2D5;Q9Y2D5-5;Q9Y2D5-7	A-kinase anchor protein 2	AKAP2			-0.285266	1.73319		0.18556	-0.50848	-0.401101	1.73546		0.0602402	-0.684907	NaN	NaN		NaN	NaN	24.1008	24.2585	24.1773	23.8716	23.9157	NaN	NaN	23.8614	23.6942	NaN	NaN	NaN	NaN	NaN	NaN
1813	2	2	36.8	7.7412	0	18.531	807860000	21	P60059	P60059	Protein transport protein Sec61 subunit gamma	SEC61G			-0.28439	1.24358		0.209502	-0.468226	-0.35196	0.865879		0.116938	-0.510764	NaN	NaN		NaN	NaN	25.928	25.8625	25.658	25.398	25.562	25.6354	25.492	25.745	25.1556	NaN	NaN	NaN	NaN	25.2739	NaN
1509	4	2	2.2	272.5	0.00025297	6.8325	124120000	11	P46531	P46531	Neurogenic locus notch homolog protein 1;Notch 1 extracellular truncation;Notch 1 intracellular domain	NOTCH1			-0.284187	0.60318		0.281459	-0.399676	-0.760825	1.02726	+	0.0282382	-0.934673	NaN	NaN		NaN	NaN	23.0273	23.5708	23.4516	23.313	23.0204	22.8637	NaN	22.8987	22.2795	NaN	NaN	NaN	NaN	NaN	NaN
2418	4	4	18.7	47.819	0.00023646	5.1911	229440000	14	Q14642	Q14642	Type I inositol 1,4,5-trisphosphate 5-phosphatase	INPP5A			-0.283928	0.430944		0.33027	-0.363155	-0.475895	0.868475		0.0680471	-0.630358	NaN	NaN		NaN	NaN	24.3603	23.9068	23.6437	23.4092	23.6029	24.0469	23.4531	23.7647	23.2653	NaN	NaN	NaN	NaN	NaN	NaN
1121	11	10	45.7	23.548	0	29.088	3379800000	74	P20340-2;P20340;P20340-4;P20340-3;Q9NRW1;Q53S08;Q9NRW1-2	P20340-2;P20340;P20340-4	Ras-related protein Rab-6A	RAB6A			-0.283822	0.618727		0.27975	-0.401937	-0.0718931	0.155269		0.765188	-0.10679	0.0309607	0.034201		0.912254	0.0384142	26.6868	27.2555	27.1316	26.669	26.5919	26.9616	26.9521	26.9774	26.9288	29.0597	28.354	28.6475	28.266	28.8999	28.9882
34	17	17	64.8	42.233	0	170.59	28652000000	361	A8MXV4	A8MXV4	Nucleoside diphosphate-linked moiety X motif 19, mitochondrial	NUDT19	Known	+	-0.283725	3.83385		0.149312	-0.545506	0.0123596	0.296456		0.946221	0.0239107	-0.872909	1.98526	+	0.0486111	-1.26241	30.8331	30.8606	30.8753	30.5414	30.5931	30.5833	30.8891	30.8676	30.8493	28.1821	28.076	27.9231	27.5393	27.0244	26.9987
4493	23	23	46.9	66.115	0	84.875	2946700000	131	Q9NSD9;Q9NSD9-2	Q9NSD9;Q9NSD9-2	Phenylalanine--tRNA ligase beta subunit	FARSB			-0.28325	0.984892		0.229152	-0.446191	-0.0060571	0.0426789		0.973145	-0.0110455	0.326988	1.00737		0.18162	0.501282	27.182	27.2206	27.2037	26.6749	26.9434	27.1384	27.1875	27.2815	27.1191	27.6918	27.8857	27.4241	27.8528	28.0943	28.0355
1875	3	3	35.3	13.714	0	29.183	6478800000	95	P61769	P61769	Beta-2-microglobulin;Beta-2-microglobulin form pI 5.3	B2M			-0.282736	0.954041		0.233758	-0.442665	-0.380697	1.95772		0.0620486	-0.650707	NaN	NaN		NaN	NaN	28.9047	28.8643	28.8574	28.3456	28.6101	28.8225	28.4146	28.6622	28.4075	NaN	NaN	NaN	NaN	NaN	NaN
3053	4	4	19.5	29.469	0	15.193	557400000	16	Q86T03;Q86T03-2;Q8N4L2	Q86T03;Q86T03-2	Type 1 phosphatidylinositol 4,5-bisphosphate 4-phosphatase	TMEM55B			-0.280877	2.14944		0.177061	-0.517675	0.316993	2.55083		0.084338	0.578017	NaN	NaN		NaN	NaN	24.7443	24.7899	24.6966	NaN	24.4956	24.4298	25.1077	24.9806	25.0935	NaN	NaN	NaN	NaN	NaN	NaN
1512	17	17	46.1	34.362	0	84.091	24103000000	369	P46777	P46777	60S ribosomal protein L5	RPL5	Predicted		-0.279482	1.1457		0.222064	-0.45465	-0.566924	2.99783	+	0.0239487	-1.00176	0.427295	1.93377		0.0767372	0.715729	30.1455	30.1737	30.2579	29.6956	29.9962	30.0469	29.5604	29.7383	29.5777	31.1363	31.0567	31.2241	31.4395	31.7254	31.534
2035	11	10	68.6	21.308	0	85.093	3560300000	116	P84095	P84095	Rho-related GTP-binding protein RhoG	RHOG			-0.27907	0.711316		0.270283	-0.410879	-0.217781	2.25771		0.203484	-0.403301	0.336231	0.948575		0.178498	0.504957	27.5963	27.5497	27.5664	26.9361	27.4391	27.5	27.2837	27.4129	27.3625	27.7735	27.7548	27.9745	27.8824	28.3882	28.2408
4006	19	19	52	54.022	0	70.446	4059700000	145	Q9BTU6	Q9BTU6	Phosphatidylinositol 4-kinase type 2-alpha	PI4K2A			-0.278259	1.08066		0.227048	-0.448048	-0.480782	2.32276	+	0.0325926	-0.822252	0.0519231	0.148006		0.815658	0.0823421	28.0017	27.895	27.8733	27.5237	27.5379	27.8736	27.3445	27.5895	27.3935	27.6936	27.3485	27.496	27.4166	27.5698	27.7075
5078	5	5	65.2	10.378	0	131.41	12745000000	128	Q9Y5J7	Q9Y5J7	Mitochondrial import inner membrane translocase subunit Tim9	TIMM9	Known	+	-0.278219	1.6438		0.196326	-0.481988	-2.1193	5.07376	+	0	-3.69778	0.0109024	0.0712816		0.950376	0.0196952	29.5927	29.6988	29.6906	29.2857	29.3449	29.5168	27.5015	27.668	27.4548	29.8317	29.8256	29.8282	29.7376	29.9189	29.8618
3505	12	12	22.5	76.743	0	49.192	8131000000	140	Q92542-2;Q92542	Q92542-2;Q92542	Nicastrin	NCSTN			-0.276377	1.93136		0.188286	-0.491035	-0.438224	2.68077	+	0.0380557	-0.780066	0.309528	0.537185		0.272776	0.410404	29.1764	29.0496	29.2584	28.8679	28.8698	28.9175	28.7442	28.7049	28.7206	25.8525	26.2921	26.1538	26.215	26.1668	26.8453
1937	5	5	29.6	13.742	0	22.379	10947000000	105	P62851	P62851	40S ribosomal protein S25	RPS25			-0.276245	0.784932		0.263979	-0.41706	-0.613871	2.7185	+	0.024839	-1.05014	0.411908	1.20039		0.105241	0.622894	29.2238	29.1779	29.1995	28.6032	29.0482	29.121	28.5333	28.7502	28.476	29.7319	29.718	29.7865	29.8477	30.3815	30.243
3911	13	13	24.4	75.775	0	131.32	9409900000	213	Q99805	Q99805	Transmembrane 9 superfamily member 2	TM9SF2			-0.27611	1.98363		0.186467	-0.492502	-0.255765	1.69785		0.160306	-0.450042	0.110313	0.480257		0.604256	0.183923	29.0746	29.0035	28.9473	28.6462	28.7382	28.8127	28.642	28.8353	28.7808	28.7554	28.7447	28.9438	28.7732	29.0084	28.9932
486	11	11	51.2	24.593	0	81.69	9157500000	125	O75396	O75396	Vesicle-trafficking protein SEC22b	SEC22B			-0.275777	1.82672		0.191364	-0.486096	0.161196	1.8057		0.355375	0.29855	0.208967	0.909117		0.350498	0.344099	29.0268	28.9996	28.9639	28.6085	28.7214	28.8331	29.0869	29.1933	29.1936	28.3068	28.0963	28.4204	28.3957	28.5688	28.4858
4768	7	7	62.1	13.623	0	93.041	3289300000	91	Q9UHA4;Q9UHA4-2	Q9UHA4;Q9UHA4-2	Ragulator complex protein LAMTOR3	LAMTOR3			-0.274378	2.19741		0.185771	-0.508099	-0.351249	1.86763		0.0766005	-0.619384	NaN	NaN		NaN	NaN	NaN	27.2442	27.3063	26.9854	26.967	27.0503	26.9452	26.831	26.9959	NaN	NaN	NaN	NaN	NaN	NaN
5139	9	9	24.9	55.299	0	21.584	1164400000	32	Q9Y6M5	Q9Y6M5	Zinc transporter 1	SLC30A1			-0.27422	1.20342		0.224723	-0.451693	-0.996019	3.59639	+	0.00866667	-1.71383	NaN	NaN		NaN	NaN	26.063	25.8613	25.9849	25.518	25.8051	25.7635	25.0832	24.9396	24.8984	NaN	NaN	NaN	NaN	NaN	NaN
2943	19	19	32.5	101.34	0	43.441	2222400000	72	Q6ZNB6;Q6ZNB6-2	Q6ZNB6;Q6ZNB6-2	NF-X1-type zinc finger protein NFXL1	NFXL1			-0.273839	1.45251		0.212218	-0.466058	-1.02416	3.39015	+	0.009	-1.72342	0.630205	0.469252		0.127496	0.582715	26.5599	26.6496	26.8521	26.4322	26.422	26.3858	25.6815	25.717	25.5906	26.6832	28.2709	28.2344	28.3948	28.7805	27.9038
4283	28	16	74.7	60.626	0	123.77	4752900000	122	Q9H4M9	Q9H4M9	EH domain-containing protein 1	EHD1			-0.272623	0.910651		0.25524	-0.426141	-0.75833	3.979	+	0.0104444	-1.38032	0.361008	1.10812		0.14349	0.552678	27.8755	27.7437	27.7814	27.4378	27.3535	27.7914	26.9865	27.0493	27.0898	28.5774	28.8128	28.9253	29.0172	29.3606	29.0208
1751	49	49	72.5	89.321	0	323.31	32029000000	643	P55072	P55072	Transitional endoplasmic reticulum ATPase	VCP			-0.272505	0.893581		0.257781	-0.424344	-0.534245	2.41168	+	0.0274861	-0.907044	0.344785	1.24002		0.147131	0.546785	30.7966	30.6371	30.6523	30.1676	30.4868	30.614	30.023	30.2716	30.1887	31.2827	31.2575	31.3793	31.4517	31.8819	31.6202
4619	3	3	4.1	107.23	0.00023629	5.1796	367600000	13	Q9NZ08;Q9NZ08-2	Q9NZ08;Q9NZ08-2	Endoplasmic reticulum aminopeptidase 1	ERAP1			-0.271715	1.6374		0.207192	-0.471913	-0.0216777	0.101771		0.915902	-0.0375987	NaN	NaN		NaN	NaN	24.5998	24.7573	24.5165	24.3073	24.3488	24.4023	24.6035	24.5513	24.6537	NaN	NaN	NaN	NaN	NaN	NaN
491	13	12	42.8	38.169	0	110.11	1151200000	63	O75436;O75436-2	O75436;O75436-2	Vacuolar protein sorting-associated protein 26A	VPS26A			-0.27167	0.273423		0.438548	-0.314595	-0.280278	0.283942		0.345716	-0.325044	0.182367	0.238614		0.524433	0.227679	NaN	25.4907	26.1994	25.4921	25.6546	NaN	25.6401	25.4894	NaN	26.9711	27.717	26.8442	27.236	27.6164	27.227
3839	5	5	14.4	56.266	0	22.707	733720000	16	Q96S66-2;Q96S66;Q96S66-3;Q96S66-4	Q96S66-2;Q96S66;Q96S66-3;Q96S66-4	Chloride channel CLIC-like protein 1	CLCC1			-0.271362	0.691721		0.281522	-0.399864	0.0745494	1.6962		0.676909	0.143382	NaN	NaN		NaN	NaN	25.6159	25.5801	25.5667	25.2202	25.0672	25.6611	25.6796	25.6356	25.6711	NaN	NaN	NaN	NaN	NaN	NaN
1933	8	8	62.9	14.865	0	51.457	16486000000	159	P62829	P62829	60S ribosomal protein L23	RPL23			-0.270866	1.13534		0.233442	-0.442448	-0.529532	2.45633	+	0.0276	-0.903982	0.399925	1.50155		0.0973634	0.641703	29.717	29.6586	29.7134	29.2121	29.4815	29.5828	29.1138	29.3308	29.0559	30.4848	30.4167	30.4543	30.6391	31.0605	30.856
1857	6	3	45.9	20.504	0	14.238	1563600000	34	P61225	P61225	Ras-related protein Rap-2b	RAP2B			-0.270512	1.19063		0.22993	-0.445798	-0.929242	3.98511	+	0.00909677	-1.65846	0.5928	2.23621	+	0.0508134	1.01545	26.7032	26.7121	26.7301	26.2507	26.4652	26.6179	25.755	25.9014	25.7013	25.9898	25.9535	25.9473	NaN	26.6663	26.4463
420	12	12	25.6	73.796	0	73.403	958020000	61	O60645-2;O60645-3;O60645	O60645-2;O60645-3;O60645	Exocyst complex component 3	EXOC3			-0.270456	1.01089		0.248153	-0.432349	-0.379382	1.14437		0.0842738	-0.578408	0.725705	0.826733		0.0635242	0.800259	25.6094	25.3558	25.2333	25.0364	25.1117	25.239	25.0683	25.1814	24.8106	26.4974	26.2853	26.1261	26.3019	27.1356	27.6484
4726	9	9	63.5	24.484	0	50.953	2737600000	49	Q9UBQ5-2;Q9UBQ5	Q9UBQ5-2;Q9UBQ5	Eukaryotic translation initiation factor 3 subunit K	EIF3K			-0.270307	0.494651		0.326492	-0.366088	-0.949736	1.90072	+	0.0133333	-1.31821	0.731909	1.28258	+	0.0505407	0.9535	26.5324	26.5064	26.9642	26.2429	26.1805	26.7686	25.5592	26.0439	25.5507	28.2531	27.9211	27.9822	28.3242	29.1721	28.8558
2861	2	2	4.8	48.868	0.00022826	4.4077	161030000	11	Q6NT16	Q6NT16	MFS-type transporter SLC18B1	SLC18B1			-0.270033	0.703933		0.2818	-0.400038	-0.192113	0.498992		0.373135	-0.287533	NaN	NaN		NaN	NaN	23.5294	23.6172	23.2705	23.482	23.0896	23.0353	23.5444	23.1453	23.151	NaN	NaN	NaN	NaN	NaN	NaN
2362	10	10	62.1	26.319	0	104.42	4030100000	140	Q13907;Q13907-2	Q13907;Q13907-2	Isopentenyl-diphosphate Delta-isomerase 1	IDI1		+	-0.269415	2.4628		0.185677	-0.495735	-0.377235	3.5713		0.0525288	-0.710158	-0.13146	0.482146		0.5536	-0.212544	27.8256	27.8417	27.9031	27.5145	27.6278	27.6197	27.4431	27.5136	27.482	27.7232	28.0209	28.0526	27.8765	27.8323	27.6935
1232	12	12	47.2	24.604	0	107.95	19050000000	240	P27635;Q96L21	P27635	60S ribosomal protein L10	RPL10	Predicted		-0.269321	1.08702		0.242668	-0.436867	-0.607906	2.40758	+	0.0236279	-1.0106	0.424864	1.91434		0.0771671	0.710803	29.5144	29.4644	29.3481	28.962	29.2709	29.286	28.8406	28.985	28.6776	31.1576	31.0919	31.1621	31.4131	31.7388	31.5343
3922	7	7	21	45.476	0	16.666	588680000	23	Q99986	Q99986	Serine/threonine-protein kinase VRK1	VRK1			-0.268343	0.798946		0.273973	-0.41681	0.496733	1.93538	+	0.0342742	0.810796	0.136123	0.153001		0.64879	0.165102	24.7494	24.6498	24.3772	24.314	NaN	24.3336	25.076	25.0667	25.1239	NaN	24.9705	25.4381	25.5346	25.5698	24.9169
879	8	8	32.1	23.662	0	138.58	4868900000	99	P09496-2;P09496-4;P09496-3;P09496;P09496-5	P09496-2;P09496-4;P09496-3;P09496;P09496-5	Clathrin light chain A	CLTA			-0.26772	1.03271		0.250161	-0.430597	-0.466916	3.32627	+	0.0288908	-0.857307	0.519669	1.98322		0.0556705	0.846176	27.5661	27.5035	27.5052	27.0416	27.2738	27.4562	27.0891	27.1055	26.9794	29.201	29.3507	29.4018	29.6497	29.9732	29.8896
4798	6	6	37	27.423	0	20.254	1261700000	34	Q9UI43	Q9UI43	rRNA methyltransferase 2, mitochondrial	FTSJ2	Known	+	-0.26705	0.536405		0.318066	-0.371112	-0.464139	1.62837	+	0.0475263	-0.736402	-0.128938	0.709117		0.536783	-0.221154	26.2649	26.1688	26.4303	25.7622	25.8729	26.4277	25.7996	25.6543	26.0176	25.534	25.5006	25.5278	25.4574	25.4901	25.2282
3396	8	7	12	93.673	0	17.869	2145700000	54	Q8TCJ2	Q8TCJ2	Dolichyl-diphosphooligosaccharide--protein glycosyltransferase subunit STT3B	STT3B			-0.266766	1.16595		0.239144	-0.439059	0.0763416	0.246612		0.727175	0.122649	-0.31873	0.245895		0.391789	-0.3148	27.1622	26.8186	27.0373	26.6817	26.7234	26.8127	26.9571	27.1993	27.0907	25.9657	25.6057	25.9728	24.5606	26.2138	25.8135
4882	5	5	26.9	34.055	0	13.724	1821400000	40	Q9UMR5-2;Q9UMR5;Q9UMR5-3	Q9UMR5-2;Q9UMR5;Q9UMR5-3	Lysosomal thioesterase PPT2	PPT2			-0.266445	1.30664		0.228116	-0.447407	0.0622203	0.6684		0.746987	0.11475	NaN	NaN		NaN	NaN	26.7551	26.8178	26.7993	26.7111	26.4182	26.4435	26.7778	26.8815	26.8994	NaN	NaN	NaN	NaN	NaN	NaN
1359	9	9	15.5	65.35	0	22.146	1043200000	40	P35240-8;P35240-3;P35240;P35240-2;P35240-6;P35240-5;P35240-4;P35240-7;P35240-9;P35240-10	P35240-8;P35240-3;P35240;P35240-2;P35240-6;P35240-5;P35240-4	Merlin	NF2			-0.266415	0.901612		0.26325	-0.417679	-0.431009	1.79028		0.0524877	-0.709004	NaN	NaN		NaN	NaN	26.2072	26.1448	26.2852	25.704	25.9767	26.1572	25.6787	25.9813	25.6841	NaN	NaN	NaN	NaN	NaN	NaN
3639	14	13	48.8	33.637	0	111.3	21189000000	340	Q96C36	Q96C36	Pyrroline-5-carboxylate reductase 2	PYCR2	Known	+	-0.266125	2.37851		0.189964	-0.488063	1.08856	4.77659	+	0.0137647	1.9988	-0.277213	1.41051		0.209176	-0.468621	29.636	29.7724	29.7125	29.4815	29.4357	29.4053	30.8306	30.7588	30.7971	29.8886	29.9441	30.0762	29.6623	29.8307	29.5843
2604	14	14	63.3	33.429	0	126.03	12560000000	223	Q16762	Q16762	Thiosulfate sulfurtransferase	TST	Known	+	-0.26605	2.43543		0.189865	-0.489364	0.329477	3.10259		0.0750418	0.614717	-0.789748	1.12038	+	0.0508473	-0.949795	29.4237	29.4876	29.4957	29.2733	29.1891	29.1464	29.8541	29.7739	29.7675	28.4483	27.9287	28.397	27.648	27.851	26.9057
4873	21	20	51.5	53.248	0	109.75	12629000000	221	Q9ULV4;Q9ULV4-2;Q9ULV4-3;Q6QEF8-4;Q6QEF8-3;Q6QEF8-2;Q6QEF8-5;Q6QEF8	Q9ULV4;Q9ULV4-2;Q9ULV4-3	Coronin-1C	CORO1C			-0.265535	0.425179		0.355641	-0.346362	-0.683575	2.26172	+	0.0264522	-1.09334	0.459003	1.12265		0.0902457	0.663035	28.9677	28.8854	29.0276	28.169	28.9271	28.9881	28.2134	28.5057	28.111	30.3286	30.6171	30.7466	30.7299	31.1445	31.195
2173	2	2	2.8	84.427	0.0065515	2.1132	1612600000	34	Q08499-6;Q08499-7;Q08499-12;Q08499-5;Q08499-8;Q08499-4;Q08499-3;Q08499-2;Q08499-10;Q08499-9;Q08499-11;Q08499	Q08499-6;Q08499-7;Q08499-12;Q08499-5;Q08499-8;Q08499-4;Q08499-3;Q08499-2;Q08499-10;Q08499-9;Q08499-11;Q08499	cAMP-specific 3,5-cyclic phosphodiesterase 4D	PDE4D			-0.264835	0.96571		0.258487	-0.421417	0.00511614	0.0208427		0.976739	0.00879334	NaN	NaN		NaN	NaN	26.4785	26.3484	26.5885	26.423	26.1064	26.0916	26.3937	26.5396	26.4974	NaN	NaN	NaN	NaN	NaN	NaN
96	3	3	40	8.4447	0	8.3787	2367700000	46	L0R8F8	L0R8F8		SMCR7L		+	-0.264784	2.401		0.191711	-0.486372	-0.127349	1.43822		0.468377	-0.235321	-0.961112	4.42385	+	0.0389333	-1.75284	27.0155	26.9589	27.0315	26.6698	26.7384	26.8034	26.9381	26.8182	26.8676	27.4131	27.2958	27.2938	26.3177	26.3955	26.4062
3623	2	2	28.6	11.564	0.00026069	7.708	320300000	12	Q96B45	Q96B45	UPF0693 protein C10orf32	C10orf32			-0.264431	0.765785		0.283448	-0.408216	NaN	NaN		NaN	NaN	NaN	NaN		NaN	NaN	24.8467	24.8933	24.7087	24.3783	24.7252	NaN	NaN	NaN	24.3415	NaN	NaN	NaN	NaN	NaN	NaN
1840	9	6	60.9	23.707	0	43.176	2148900000	44	P61020;P61020-2	P61020;P61020-2	Ras-related protein Rab-5B	RAB5B			-0.263625	2.02032		0.205132	-0.473726	0.0606467	0.368271		0.765509	0.106609	0.59126	1.05376		0.0640407	0.774268	26.7976	26.6245	26.7567	26.4565	26.4289	26.5026	26.7114	26.7826	26.8667	26.5028	27.1864	26.5008	27.3211	27.0927	27.55
1858	16	16	53.8	29.945	0	142.77	29770000000	302	P61247	P61247	40S ribosomal protein S3a	RPS3A			-0.262842	1.02055		0.257307	-0.423323	-0.562274	2.64908	+	0.0249496	-0.968065	0.569132	1.75044		0.052783	0.880338	30.1306	30.0128	30.0468	29.5698	29.9012	29.9308	29.4262	29.6468	29.4303	31.6532	31.7001	31.8288	32.042	32.5106	32.3369
1892	12	12	60.3	22.127	0	106.2	16928000000	140	P62081	P62081	40S ribosomal protein S7	RPS7			-0.262678	0.645534		0.304551	-0.38414	-0.76191	2.45996	+	0.0181591	-1.2227	0.650631	1.48628	+	0.050155	0.925785	28.5039	28.3481	28.201	27.7687	28.2059	28.2904	27.4371	27.7375	27.5927	31.2026	31.4604	31.6204	31.8076	32.3684	32.0592
2288	8	8	28.9	44.349	0	25.479	876900000	74	Q13418-2;Q13418;Q13418-3	Q13418-2;Q13418;Q13418-3	Integrin-linked protein kinase	ILK			-0.261164	1.04855		0.257027	-0.423271	-0.542657	2.60042	+	0.0250435	-0.935008	0.380541	1.57006		0.105699	0.622366	25.5968	25.7585	25.8208	25.3558	25.381	25.6559	25.1013	25.1911	25.2557	25.3873	25.4538	25.6996	25.9436	25.9608	25.778
2221	14	14	53.7	40.228	0	129.9	18138000000	241	Q12907	Q12907	Vesicular integral-membrane protein VIP36	LMAN2			-0.260232	0.749571		0.288567	-0.394619	-0.0584666	0.210678		0.790611	-0.0962308	0.189928	0.610723		0.418081	0.296985	30.2824	30.0959	30.0132	29.6397	29.8537	30.1174	29.9292	30.1635	30.1234	28.5853	28.1681	28.3687	28.4233	28.6294	28.6392
2774	33	10	58.8	72.572	0	264.53	5974200000	145	Q5T9A4;Q5T9A4-3;Q5T9A4-2	Q5T9A4;Q5T9A4-3	ATPase family AAA domain-containing protein 3B	ATAD3B	Known	+	-0.260118	2.40002		0.201137	-0.478466	0.348912	1.51469		0.0846797	0.57533	0.522416	0.841499		0.0902732	0.662837	28.1898	28.182	28.2629	27.8933	27.9461	28.015	28.4662	28.7668	28.4484	28.2233	27.5154	27.4416	28.213	28.0185	28.516
4615	9	8	7.5	174.73	0	11.902	597780000	13	Q9NYU1;Q9NYU1-2	Q9NYU1	UDP-glucose:glycoprotein glucosyltransferase 2	UGGT2			-0.259279	1.14766		0.253509	-0.42768	0.187744	0.493875		0.38898	0.285243	NaN	NaN		NaN	NaN	25.2329	25.185	25.4716	25.1186	25.0695	24.9236	25.3377	25.6308	NaN	NaN	NaN	NaN	NaN	NaN	NaN
1769	28	28	43.2	92.48	0	132.32	5727000000	149	P55884;P55884-2	P55884;P55884-2	Eukaryotic translation initiation factor 3 subunit B	EIF3B			-0.25879	0.368278		0.391515	-0.325979	-0.710756	0.75484	+	0.0417203	-0.761991	0.34481	0.688084		0.205289	0.473607	27.9766	27.9725	27.9991	27.1369	28.0383	27.9967	26.4505	27.9182	27.4473	29.6366	29.234	29.2426	29.3453	29.9138	29.8884
3607	3	3	4.6	60.335	0.00022952	4.5081	703120000	12	Q96AA3	Q96AA3	Protein RFT1 homolog	RFT1			-0.258295	0.876855		0.279531	-0.412608	0.340187	1.32105		0.0963916	0.548191	NaN	NaN		NaN	NaN	25.5637	25.2558	25.4328	25.0905	25.2278	NaN	25.624	25.7448	25.9041	NaN	NaN	NaN	NaN	NaN	NaN
606	2	2	11	25.609	0	79.841	9131400000	93	O95197-3;O95197-6;O95197-5;O95197-4;O95197-7;O95197-2;O95197	O95197-3;O95197-6;O95197-5;O95197-4;O95197-7;O95197-2;O95197	Reticulon-3	RTN3			-0.258122	1.32706		0.242534	-0.436726	-0.369689	1.11761		0.0899592	-0.563929	0.180796	0.709871		0.423446	0.293353	29.1362	29.0197	29.1162	28.6791	28.8516	28.967	28.8104	28.4259	28.9267	28.5141	28.3249	28.7107	28.6341	28.7482	28.7098
8	15	15	35.6	67.867	0	100.87	5834900000	124	A1L0T0	A1L0T0	Acetolactate synthase-like protein	ILVBL	Predicted		-0.257865	2.15071		0.209247	-0.46822	-0.217496	2.70923		0.195743	-0.410269	0.224988	0.557609		0.366531	0.331401	28.5438	28.5394	28.4647	28.188	28.2477	28.3386	28.2879	28.3296	28.278	27.329	26.8499	27.1595	27.2372	27.5595	27.2165
2471	5	5	15.6	52.838	0	68.742	5113200000	93	Q15043-2;Q15043-3;Q15043	Q15043-2;Q15043-3;Q15043	Zinc transporter ZIP14	SLC39A14			-0.257809	0.943059		0.270094	-0.410604	-0.713658	3.22745	+	0.0175059	-1.24691	0.105661	0.377633		0.628365	0.171127	28.3949	28.2035	28.3286	27.8655	28.0268	28.2613	27.5217	27.6789	27.5855	27.7444	28.0058	28.0687	27.9839	28.1707	27.9813
2702	4	4	27	21.789	0	17.803	1455700000	34	Q587I9	Q587I9	Vesicle transport protein SFT2C	SFT2D3			-0.257404	1.12586		0.257345	-0.423697	0.0955925	0.331267		0.657807	0.154463	0.226411	2.15665		0.267401	0.41591	26.3119	26.4637	26.1831	26.031	25.9585	26.197	26.2416	26.5102	26.4936	25.9306	25.8314	25.9425	26.0862	26.1192	26.1784
1390	6	6	40.2	20.878	0	28.815	880960000	37	P36404;P36404-2	P36404;P36404-2	ADP-ribosylation factor-like protein 2	ARL2	Predicted	+	-0.256969	1.18339		0.254994	-0.426797	-0.363661	1.11714		0.0927032	-0.556835	NaN	NaN		NaN	NaN	25.199	25.4603	25.1844	24.9309	25.0962	25.0457	25.1596	24.7489	24.8442	NaN	NaN	NaN	NaN	NaN	NaN
4987	13	13	45.2	46.939	0	53.049	1264600000	62	Q9Y2T2;P53677;P53677-2	Q9Y2T2	AP-3 complex subunit mu-1	AP3M1			-0.255672	0.936788		0.273973	-0.407368	-0.592803	2.12601	+	0.0249742	-0.958422	0.307036	1.20563		0.185724	0.495471	26.1265	25.9302	26.2165	25.6472	25.9001	25.9589	25.3436	25.6282	25.523	26.7581	27.0473	26.9043	27.1857	27.3696	27.0756
782	25	25	42.7	88.414	0	261.29	19406000000	353	P05556;P05556-2;P05556-5;P05556-4;P05556-3	P05556;P05556-2;P05556-5;P05556-4;P05556-3	Integrin beta-1	ITGB1			-0.255557	1.00059		0.268198	-0.412316	-0.190454	1.23026		0.295685	-0.332547	0.522053	2.1257		0.0530317	0.86376	30.0224	29.9132	29.8484	29.4779	29.6864	29.853	29.7521	29.8196	29.641	30.0499	30.0355	30.0857	30.4524	30.7838	30.501
4173	6	6	50.7	16.694	0	15.844	2134900000	57	Q9GZY4	Q9GZY4	Cytochrome c oxidase assembly factor 1 homolog	COA1	Known	+	-0.255346	1.03029		0.267065	-0.414269	-0.0622406	0.176531		0.786778	-0.0982029	0.402584	0.288626		0.309082	0.378521	26.5478	26.9327	26.721	26.5289	26.4139	26.4927	26.5249	26.7646	26.7254	28.0634	26.1848	26.9632	27.2222	27.4771	27.7199
311	6	6	42.9	23.773	0	35.728	2161600000	41	O43402;O43402-2	O43402	ER membrane protein complex subunit 8	EMC8	Known		-0.255304	1.88629		0.221945	-0.456023	0.135459	0.715429		0.474648	0.230946	0.356527	0.665145		0.200491	0.479858	27.0239	26.8736	26.9826	26.656	26.7832	26.6749	27.2433	27.0285	27.0146	25.1368	25.76	25.6218	25.5606	26.0534	25.9742
3949	4	4	15.4	33.116	0	13.414	616910000	24	Q9BQT8-2;Q9BQT8	Q9BQT8-2;Q9BQT8	Mitochondrial 2-oxodicarboxylate carrier	SLC25A21	Known	+	-0.254946	1.32523		0.248735	-0.432075	NaN	NaN		NaN	NaN	NaN	NaN		NaN	NaN	25.8955	26.0071	25.7669	25.7358	25.5371	25.6316	NaN	NaN	NaN	NaN	NaN	NaN	NaN	NaN	NaN
315	12	8	9.1	176.65	0	16.614	361190000	33	O43432;O43432-3;O43432-4;O43432-2	O43432;O43432-3;O43432-4	Eukaryotic translation initiation factor 4 gamma 3	EIF4G3			-0.254616	0.322332		0.415324	-0.308949	-0.0646845	0.103596		0.807057	-0.0892524	0.248934	0.684471		0.314184	0.374105	23.9465	24.1671	23.8306	23.1299	23.8882	24.1622	24.1881	23.522	24.04	24.8566	25.0878	24.9565	24.935	25.2591	25.4536
450	7	7	27.9	46.432	0	31.945	569210000	32	O75063	O75063	Glycosaminoglycan xylosylkinase	FAM20B			-0.254358	2.89433		0.201253	-0.47858	-0.152875	0.936962		0.413246	-0.265272	NaN	NaN		NaN	NaN	24.8846	24.9591	24.9868	24.7045	24.681	24.6819	24.7036	24.9289	24.7394	NaN	NaN	NaN	NaN	NaN	NaN
1230	18	13	36.8	81.438	0	68.077	1019400000	64	P27448-3;P27448-4;P27448;P27448-6;P27448-2;P27448-8;P27448-7	P27448-3;P27448-4;P27448;P27448-6;P27448-2;P27448-8;P27448-7	MAP/microtubule affinity-regulating kinase 3	MARK3			-0.253714	0.718142		0.305893	-0.383522	-0.351561	1.06555		0.10097	-0.536683	0.89986	2.93424	+	0.0443175	1.47825	25.8679	25.8839	25.5303	25.3609	25.4305	25.7296	25.3142	25.6162	25.297	26.2669	26.093	26.0613	26.8643	27.1288	27.1276
1365	4	4	50.8	14.787	0	130.69	9711700000	74	P35268	P35268	60S ribosomal protein L22	RPL22			-0.253612	0.911305		0.279364	-0.402612	-0.321866	3.04684		0.0771566	-0.600111	0.446177	1.84661		0.0729715	0.734497	28.4253	28.389	28.3854	27.9055	28.1852	28.3483	28.0298	28.1438	28.0606	30.1719	30.1452	30.1657	30.4389	30.8062	30.5762
4959	4	4	16.6	41.084	0	15.725	1473500000	38	Q9Y2C4;Q9Y2C4-3;Q9Y2C4-4;Q9Y2C4-2	Q9Y2C4;Q9Y2C4-3;Q9Y2C4-4	Nuclease EXOG, mitochondrial	EXOG	Known	+	-0.253575	1.41936		0.244929	-0.434819	0.20293	1.79815		0.242567	0.368608	-0.157758	1.11016		0.459634	-0.288559	26.386	26.4055	26.5238	26.3238	26.1422	26.0886	26.6109	26.6191	26.6941	NaN	24.9466	24.8821	24.7904	NaN	24.7228
127	2	2	4.9	60.908	0.00023793	5.3065	511330000	10	O00400	O00400	Acetyl-coenzyme A transporter 1	SLC33A1			-0.252934	1.42417		0.245524	-0.434106	0.022871	0.293614		0.909046	0.0430272	NaN	NaN		NaN	NaN	25.1065	25.0634	25.0764	24.7452	24.7498	24.9925	25.048	25.1254	25.1415	NaN	NaN	NaN	NaN	NaN	NaN
522	10	10	26.9	46.561	0	30.11	27632000000	141	O75718	O75718	Cartilage-associated protein	CRTAP			-0.252846	1.326		0.251098	-0.429096	0.0510629	0.25949		0.808842	0.0882888	1.35849	3.18698	+	0.0274667	2.11911	30.5049	30.6257	30.3567	30.1556	30.2917	30.2815	30.5646	30.5321	30.5437	29.4897	29.7205	29.3117	30.7918	31.0193	30.7863
2532	13	10	27.6	86.16	0	39.112	1546100000	50	Q15436;Q15436-2	Q15436;Q15436-2	Protein transport protein Sec23A	SEC23A			-0.252029	0.562334		0.332306	-0.360588	-0.0531928	0.144819		0.820186	-0.083583	-0.683923	1.54853	+	0.051068	-1.01833	26.3745	26.3221	26.299	25.6871	26.2369	26.3155	26.0311	26.4938	26.3111	26.8156	NaN	27.0671	26.0764	26.4603	26.2356
2453	6	6	10.3	90.828	0	14.163	435600000	14	Q14BN4-2;Q14BN4-3;Q14BN4;Q14BN4-5;Q14BN4-4;Q14BN4-8;Q14BN4-7;Q14BN4-6	Q14BN4-2;Q14BN4-3;Q14BN4;Q14BN4-5;Q14BN4-4;Q14BN4-8	Sarcolemmal membrane-associated protein	SLMAP			-0.252028	1.45992		0.24564	-0.43443	-0.12813	1.5758		0.463173	-0.238441	NaN	NaN		NaN	NaN	24.8549	24.9165	24.9257	24.5097	24.6554	24.7759	24.8055	24.7962	24.7111	NaN	NaN	NaN	NaN	NaN	NaN
2186	70	70	29.4	629.09	0	211.28	19716000000	437	Q09666;Q09666-2;P48552	Q09666	Neuroblast differentiation-associated protein AHNAK	AHNAK			-0.250517	0.709653		0.308706	-0.378881	-0.451561	2.89801	+	0.0339676	-0.812495	0.126493	0.408676		0.573035	0.200337	30.4523	30.4837	30.4132	29.8888	30.2876	30.4212	29.9678	30.0993	29.9274	27.3425	27.0615	27.1861	27.1833	27.5246	27.2616
475	11	11	59.3	12.855	0	72.425	8239100000	167	O75347;O75347-2	O75347;O75347-2	Tubulin-specific chaperone A	TBCA			-0.248896	0.438504		0.375362	-0.334803	-0.360517	1.04417		0.0984304	-0.544431	0.381491	1.50473		0.108246	0.618033	28.5415	28.3196	28.5013	27.7417	28.3863	28.4878	27.8524	28.3602	28.0682	29.6508	29.6553	29.8789	29.9758	30.2806	30.073
1450	42	42	44.9	144.5	0	258	8709600000	319	P41252	P41252	Isoleucine--tRNA ligase, cytoplasmic	IARS			-0.248644	0.589723		0.331529	-0.361234	-0.430099	1.86348		0.0517991	-0.713977	0.481165	1.85885		0.0642474	0.782483	28.9587	28.8758	28.8178	28.2678	28.8165	28.822	28.4144	28.6327	28.3148	29.3014	29.1428	29.2472	29.5973	29.9215	29.6161
2439	10	10	33.7	63.145	0	67.376	2055600000	57	Q14699	Q14699	Raftlin	RFTN1			-0.247939	1.09283		0.271612	-0.408687	0.0175419	0.0621623		0.932871	0.0293343	NaN	NaN		NaN	NaN	27.1471	26.9705	26.8609	26.674	26.6827	26.8779	27.0155	27.0969	26.9187	NaN	NaN	NaN	NaN	NaN	NaN
3887	15	15	30.2	56.44	0	49.26	1484800000	67	Q99615;Q99615-2	Q99615;Q99615-2	DnaJ homolog subfamily C member 7	DNAJC7			-0.247802	0.641999		0.324511	-0.367529	-0.700643	2.22816	+	0.0271152	-1.11014	0.0302798	0.0431634		0.905923	0.0409605	26.2776	26.1302	26.1685	25.6076	26.098	26.1272	25.4464	25.7243	25.3037	27.4124	27.2371	26.808	26.8665	27.3455	27.3362
1441	19	19	46	51.109	0	132.59	4740700000	147	P41091;Q2VIR3;Q2VIR3-2	P41091;Q2VIR3;Q2VIR3-2	Eukaryotic translation initiation factor 2 subunit 3;Putative eukaryotic translation initiation factor 2 subunit 3-like protein	EIF2S3;EIF2S3L			-0.247414	0.365184		0.405117	-0.315981	-0.309605	1.26898		0.119403	-0.503859	0.451863	1.55113		0.0767019	0.712508	27.382	27.7012	27.4	26.8204	27.7279	27.1926	27.1523	27.2808	27.1212	29.0951	29.105	29.1969	29.3811	29.8269	29.5447
3006	12	12	63.9	22.814	0	92.422	6389400000	120	Q7Z2W9;Q7Z2W9-2	Q7Z2W9;Q7Z2W9-2	39S ribosomal protein L21, mitochondrial	MRPL21	Known	+	-0.245719	1.43945		0.25795	-0.424121	-0.186089	1.27037		0.305	-0.327206	-0.0303561	0.383637		0.872599	-0.0569225	28.5796	28.3512	28.4514	28.2633	28.1273	28.2545	28.2438	28.2714	28.3088	28.8068	28.8955	28.8384	28.8158	28.853	28.7808
2480	27	27	24	162.46	0	100.26	3759800000	116	Q15075	Q15075	Early endosome antigen 1	EEA1			-0.245719	1.56581		0.250998	-0.429439	-0.0381349	0.13371		0.86887	-0.0630259	NaN	NaN		NaN	NaN	27.9728	27.8923	27.9851	27.6814	27.6032	27.8285	27.9365	28.0733	27.7261	NaN	NaN	NaN	NaN	NaN	NaN
961	25	10	80.9	32.866	0	118.89	37720000000	364	P12236	P12236	ADP/ATP translocase 3;ADP/ATP translocase 3, N-terminally processed	SLC25A6	Known	+	-0.245565	0.589564		0.336716	-0.357951	-1.70168	6.01466	+	0	-3.18597	0.0648842	0.191716		0.773511	0.103043	30.5773	30.5869	30.578	30.0985	30.7021	30.2049	28.9106	28.9154	28.8112	31.7304	32.053	31.9367	31.9459	32.1369	31.8319
2465	35	35	34.6	157.18	0	241.34	2255300000	154	Q15021	Q15021	Condensin complex subunit 1	NCAPD2			-0.245426	0.13071		0.598197	-0.206211	-0.414845	0.707493		0.0998242	-0.540394	0.60478	1.04828		0.0644047	0.78437	25.3079	25.6693	25.534	23.9017	26.061	25.8121	24.7175	25.5541	24.9949	28.4566	28.6319	28.43	28.5845	29.3967	29.3516
2815	9	9	36.5	57.235	0	104.32	6107700000	128	Q5ZPR3;Q5ZPR3-3;Q5ZPR3-4;Q5ZPR3-2	Q5ZPR3;Q5ZPR3-3;Q5ZPR3-4;Q5ZPR3-2	CD276 antigen	CD276			-0.245134	0.822447		0.304743	-0.384174	-0.0190614	0.0832577		0.924635	-0.032807	0.405184	0.814492		0.142716	0.554842	28.5029	28.4123	28.3188	27.926	28.2125	28.3601	28.3463	28.5134	28.3171	27.8859	28.3119	28.46	28.3489	28.8776	28.6468
787	12	7	28.1	60.761	0	12.827	1540600000	29	P06241;P06241-3;P06241-2	P06241;P06241-3;P06241-2	Tyrosine-protein kinase Fyn	FYN			-0.243475	1.31941		0.267695	-0.42329	-0.147175	0.212946		0.573084	-0.193359	NaN	NaN		NaN	NaN	26.8142	26.7711	26.7627	NaN	26.4422	26.6362	26.2862	26.9848	NaN	25.2722	NaN	NaN	NaN	NaN	NaN
2411	5	5	10.2	59.594	0.00025641	7.2271	732600000	13	Q14554	Q14554	Protein disulfide-isomerase A5	PDIA5			-0.243355	0.904615		0.297632	-0.389042	0.0331478	0.109332		0.886218	0.0543739	NaN	NaN		NaN	NaN	25.563	25.759	25.4243	25.3663	25.1892	25.4606	25.5399	25.7122	25.5936	NaN	NaN	NaN	NaN	NaN	NaN
2226	26	23	49	95.165	0	171.03	5161800000	151	Q12959-5;Q12959-3;Q12959;Q12959-6;Q12959-4;Q12959-7;Q12959-2;Q12959-8;Q12959-9;Q15700-3;Q15700;Q15700-4;Q15700-2;Q15700-5;P78352-3;P78352;P78352-2	Q12959-5;Q12959-3;Q12959;Q12959-6;Q12959-4;Q12959-7;Q12959-2;Q12959-8;Q12959-9	Disks large homolog 1	DLG1			-0.243305	1.13826		0.276491	-0.405154	-0.58363	2.26363	+	0.0253372	-0.961848	0.162004	0.273144		0.539913	0.219568	28.4056	28.2535	28.3246	27.913	28.121	28.2197	27.7684	27.8995	27.5649	27.8944	27.9113	28.0142	27.6385	28.4	28.2674
3821	6	6	21.9	41.676	0	20.685	1335300000	40	Q96QE5;Q96QE5-4	Q96QE5;Q96QE5-4	Transcription elongation factor, mitochondrial	TEFM	Known	+	-0.24199	2.15565		0.233391	-0.442025	0.0637875	0.61304		0.742017	0.116677	NaN	NaN		NaN	NaN	26.362	26.3188	26.4519	26.1553	26.1687	26.0827	26.4166	26.4921	26.4154	NaN	NaN	NaN	NaN	NaN	NaN
375	4	4	10.6	52.747	0	11.857	283620000	7	O43854-2;O43854	O43854-2;O43854	EGF-like repeat and discoidin I-like domain-containing protein 3	EDIL3			-0.241965	0.708954		0.321453	-0.368941	-0.608693	1.249	+	0.0312421	-0.868361	NaN	NaN		NaN	NaN	24.1933	24.5857	24.6909	24.1895	24.2383	24.3163	23.8186	NaN	23.944	NaN	NaN	NaN	NaN	NaN	NaN
930	36	24	62.1	70.897	0	323.31	142570000000	1257	P11142;P11142-2	P11142;P11142-2	Heat shock cognate 71 kDa protein	HSPA8	Predicted		-0.241857	0.841111		0.305917	-0.381804	-0.737687	2.9227	+	0.0166265	-1.25083	0.373007	1.09314		0.135676	0.564789	32.7337	32.6629	32.6949	32.1933	32.5597	32.6129	31.8718	32.1343	31.8724	33.6363	33.6747	33.6903	33.7558	34.308	34.0566
765	48	30	49.1	113	0	323.31	86275000000	715	P05023-4;P05023;P05023-3;P05023-2;P20648	P05023-4;P05023;P05023-3;P05023-2	Sodium/potassium-transporting ATPase subunit alpha-1	ATP1A1			-0.241772	0.939877		0.297789	-0.389762	-0.451828	2.44713	+	0.0361825	-0.787688	0.284758	1.74493		0.185376	0.496458	32.4856	32.3757	32.3073	31.9582	32.1511	32.3341	31.9287	32.0323	31.8522	31.3592	31.4416	31.4684	31.5765	31.7653	31.7817
122	21	20	25.8	113.07	0	88.894	1534900000	80	O00291-4;O00291;O00291-3	O00291-4;O00291;O00291-3	Huntingtin-interacting protein 1	HIP1			-0.241198	0.515368		0.363392	-0.341975	0.0321178	0.0859891		0.892848	0.0507804	NaN	NaN		NaN	NaN	24.5916	24.5561	24.2581	23.9561	24.1689	24.5572	24.5448	24.6115	24.3458	NaN	NaN	NaN	NaN	NaN	NaN
1900	11	11	62.3	16.445	0	28.977	14243000000	181	P62249	P62249	40S ribosomal protein S16	RPS16			-0.240898	0.934997		0.299221	-0.388256	-0.642019	1.98701	+	0.0240257	-1.00213	0.45731	1.38124		0.0808556	0.698701	28.5683	28.543	28.495	28.062	28.4506	28.3711	27.6403	28.1196	27.9204	31.1579	31.0121	31.0413	31.2772	31.7894	31.5167
1868	10	3	62.2	21.768	0	115.02	8956600000	51	P61586	P61586	Transforming protein RhoA	RHOA	Predicted		-0.240685	0.48497		0.373534	-0.336207	-0.261877	0.801304		0.204825	-0.402233	0.337022	1.33114		0.149181	0.544921	29.241	28.9136	28.8266	28.4266	28.8061	29.0264	28.6534	28.8979	28.6443	28.8921	29.146	29.1275	29.2493	29.5459	29.3816
1870	9	9	69.6	10.932	0	51.271	379040000000	2679	P61604	P61604	10 kDa heat shock protein, mitochondrial	HSPE1	Known	+	-0.240234	2.7698		0.224467	-0.451507	0.00593567	0.0599098		0.973053	0.0111085	-0.0163015	0.164237		0.928823	-0.0303362	34.336	34.3973	34.2917	34.1205	34.0914	34.0925	34.3726	34.3192	34.3511	33.8109	33.8094	33.8812	33.8484	33.7598	33.8444
976	4	4	7.3	70.58	0	8.3521	388700000	11	P13196	P13196	5-aminolevulinate synthase, nonspecific, mitochondrial	ALAS1	Known	+	-0.240201	1.61151		0.257466	-0.422704	-0.324986	2.12839		0.0845826	-0.575323	NaN	NaN		NaN	NaN	24.8837	24.7375	24.7264	24.4677	24.5338	24.6253	24.3886	24.4552	24.5288	NaN	NaN	NaN	NaN	NaN	NaN
3401	8	8	26	36.813	0	78.51	6765500000	144	Q8TCT9-5;Q8TCT9;Q8TCT9-4;Q8TCT9-2	Q8TCT9-5;Q8TCT9;Q8TCT9-4;Q8TCT9-2	Minor histocompatibility antigen H13	HM13			-0.240143	0.93167		0.300791	-0.387023	0.49338	2.26199	+	0.0315732	0.835723	0.229623	0.865718		0.320106	0.36835	28.6776	28.4176	28.4448	28.1064	28.3093	28.404	28.9371	29.0209	29.0622	26.6626	26.5243	26.6114	26.6811	27.0591	26.747
1401	20	5	66.9	36.983	0	32.672	2729600000	62	P36873;P36873-2	P36873;P36873-2	Serine/threonine-protein phosphatase PP1-gamma catalytic subunit	PPP1CC	Predicted		-0.239958	1.09718		0.284121	-0.398049	-0.270378	2.03173		0.129004	-0.484979	0.602437	1.42028		0.0529518	0.863757	27.0241	27.1377	26.9752	26.624	26.8999	26.8932	26.7283	26.8351	26.7624	27.3992	27.1367	27.3782	27.5594	28.1515	28.0106
5008	5	5	14.7	39.869	0	11.316	639230000	36	Q9Y376	Q9Y376	Calcium-binding protein 39	CAB39			-0.238356	0.599009		0.347164	-0.351514	-0.440381	2.13677	+	0.044253	-0.749672	0.199273	0.871157		0.382577	0.34265	25.2544	25.1143	25.2294	24.6723	24.9409	25.2698	24.7162	24.9068	24.654	NaN	25.1269	25.2635	25.4391	NaN	25.3498
3529	34	34	42.1	97.34	0	195.84	9219800000	221	Q92667;Q92667-2	Q92667;Q92667-2	A-kinase anchor protein 1, mitochondrial	AKAP1	Known	+	-0.238129	1.73925		0.257491	-0.423886	-0.317436	1.96989		0.0928591	-0.556571	-0.00625165	0.0177801		0.965837	-0.0101353	28.9489	28.9179	28.8044	28.6394	28.5843	28.7331	28.6259	28.4631	28.6299	29.0412	29.1989	29.2	29.2583	28.9326	29.2304
4879	46	46	48.2	148.66	0	231.16	14651000000	366	Q9UM54-6;Q9UM54-4;Q9UM54;Q9UM54-5;Q9UM54-2;Q9UM54-1	Q9UM54-6;Q9UM54-4;Q9UM54;Q9UM54-5;Q9UM54-2;Q9UM54-1	Unconventional myosin-VI	MYO6			-0.237344	0.350943		0.425367	-0.303938	-0.385491	1.31615		0.0763024	-0.605016	0.143929	0.413364		0.534455	0.222092	30.0359	29.8936	29.7098	29.1287	29.7895	30.009	29.3858	29.693	29.404	28.5181	28.6362	28.3304	28.4789	28.8698	28.5678
749	26	26	78.1	48.534	0	323.31	214400000000	1175	P04181;P04181-2	P04181;P04181-2	Ornithine aminotransferase, mitochondrial;Ornithine aminotransferase, hepatic form;Ornithine aminotransferase, renal form	OAT	Known	+	-0.237186	4.03108		0.217474	-0.46057	-0.225479	2.41159		0.18577	-0.419447	0.433402	4.47742		0.058137	0.831674	33.7179	33.7232	33.6799	33.4798	33.4584	33.4711	33.5461	33.4259	33.4724	31.9588	31.9762	31.9755	32.3632	32.4278	32.4197
1970	6	6	63.9	9.1113	0	122.47	6132200000	120	P63220	P63220	40S ribosomal protein S21	RPS21			-0.237079	0.566822		0.355552	-0.345671	-0.49299	1.17303		0.0522328	-0.706689	0.463463	1.19045		0.0859523	0.678557	27.9328	27.9121	28.0518	27.3672	27.9152	27.9031	27.2571	27.8572	27.3035	29.0607	29.264	29.2469	29.3516	29.9436	29.6668
2989	10	10	39.8	53.262	0	60.878	2062300000	70	Q7L3T8	Q7L3T8	Probable proline--tRNA ligase, mitochondrial	PARS2	Known	+	-0.236791	1.18165		0.2837	-0.398496	-0.0356051	0.130021		0.875998	-0.0592821	0.101409	0.247231		0.66654	0.153118	26.9165	26.6471	26.7266	26.6059	26.5394	26.4345	26.6057	26.7844	26.7933	26.7617	26.3067	26.6699	26.5877	26.8483	26.6066
1907	8	8	45.7	17.222	0	29.599	14777000000	185	P62277	P62277	40S ribosomal protein S13	RPS13			-0.236267	0.725229		0.329956	-0.363983	-0.529441	2.17349	+	0.029061	-0.878533	0.538995	1.99822		0.052703	0.873281	29.5333	29.4195	29.4794	28.9503	29.3914	29.3817	28.8763	29.1404	28.8272	30.3761	30.0981	30.4055	30.7103	30.929	30.8574
2854	4	4	3.7	127.13	0	8.2227	365340000	8	Q6IQ23;Q6IQ23-2;Q6IQ23-3	Q6IQ23;Q6IQ23-2;Q6IQ23-3	Pleckstrin homology domain-containing family A member 7	PLEKHA7			-0.2353	0.42956		0.398127	-0.32048	-0.273521	0.51035		0.241729	-0.377934	NaN	NaN		NaN	NaN	25.0132	24.7865	24.4457	24.1812	24.6614	24.6969	24.3828	24.5671	NaN	NaN	NaN	NaN	NaN	NaN	NaN
299	6	6	11.1	61.097	0	8.6145	434750000	18	O43292-2;O43292	O43292-2;O43292	Glycosylphosphatidylinositol anchor attachment 1 protein	GPAA1			-0.234961	0.911553		0.308533	-0.378767	0.108302	0.33515		0.615665	0.171002	NaN	NaN		NaN	NaN	24.9779	24.6257	24.8283	24.4482	24.6367	24.6421	24.9504	25.0493	24.757	NaN	NaN	NaN	NaN	NaN	NaN
1736	16	16	63.8	31.512	0	145.08	48598000000	385	P54709;P54709-2	P54709;P54709-2	Sodium/potassium-transporting ATPase subunit beta-3	ATP1B3			-0.234159	0.970244		0.306029	-0.381952	-0.498653	2.5746	+	0.0295801	-0.867153	-0.0506452	0.173916		0.814774	-0.0829816	31.8073	31.7194	31.7173	31.3227	31.5183	31.7005	31.2066	31.3842	31.1572	29.186	28.9295	28.9579	28.9515	29.1129	28.8571
3237	6	6	25	32.146	0	21.393	1514500000	47	Q8N3Z3;Q8N3Z3-2;Q8N3Z3-3	Q8N3Z3;Q8N3Z3-2;Q8N3Z3-3	GTP-binding protein 8	GTPBP8	Predicted		-0.233999	0.744168		0.330143	-0.363177	-0.420762	1.65935		0.0573997	-0.683605	0.131919	0.287291		0.588003	0.192467	26.2394	26.0604	26.3617	25.9855	25.7882	26.1857	25.6824	25.9404	25.7764	26.9092	26.8818	26.5812	26.8519	26.7006	27.2154
3765	15	15	36.6	56.92	0	55.493	3914100000	117	Q96JB5;Q96JB5-4;Q96JB5-2;Q96JB5-3	Q96JB5;Q96JB5-4;Q96JB5-2	CDK5 regulatory subunit-associated protein 3	CDK5RAP3			-0.232912	1.00709		0.306154	-0.382755	-0.0114059	0.0466684		0.955485	-0.0195429	-0.444209	0.323537		0.266584	-0.417613	28.0228	27.9232	27.7539	27.5493	27.6456	27.8062	27.8474	27.9442	27.874	26.3893	25.8726	26.4717	26.3557	26.3078	24.7375
1891	6	6	61.1	10.333	0	33.154	5229200000	58	P62072	P62072	Mitochondrial import inner membrane translocase subunit Tim10	TIMM10	Known	+	-0.232801	1.09215		0.299589	-0.387858	-1.33135	4.0624	+	0.0143333	-2.28523	0.0659949	0.413006		0.742712	0.116201	28.5962	28.5582	28.793	28.2969	28.4164	28.5356	27.242	27.3396	27.3717	27.3778	27.3582	27.4119	27.3186	27.4929	27.5344
3542	5	5	12.4	50.381	0	11.568	513550000	11	Q92791	Q92791	Synaptonemal complex protein SC65	LEPREL4			-0.23249	0.889197		0.31797	-0.38001	-0.00992775	0.0303762		0.962045	-0.0162741	NaN	NaN		NaN	NaN	25.0859	25.0033	25.0102	24.6578	NaN	24.9435	24.9264	25.2365	24.9067	NaN	NaN	NaN	NaN	NaN	NaN
219	17	17	33.3	70.038	0	49.059	2115200000	61	O14967;O14967-2	O14967	Calmegin	CLGN			-0.232481	1.50824		0.273689	-0.406952	-0.523631	2.92049	+	0.0261953	-0.928754	NaN	NaN		NaN	NaN	27.2014	27.2233	27.1685	26.8589	26.941	27.0959	26.5508	26.7291	26.7424	NaN	NaN	NaN	NaN	NaN	NaN
1864	7	7	45.6	15.798	0	59.506	13121000000	144	P61353	P61353	60S ribosomal protein L27	RPL27			-0.232096	0.621911		0.353134	-0.347547	-0.450127	1.65898	+	0.0499618	-0.721822	0.431321	2.09052		0.0728606	0.73322	28.5927	28.6272	28.3628	28.0068	28.4765	28.403	27.9093	28.2245	28.0985	30.8498	30.7773	30.7471	31.0721	31.3578	31.2383
188	5	5	18.2	35.914	0	34.146	621190000	18	O14734	O14734	Acyl-coenzyme A thioesterase 8	ACOT8	Predicted		-0.231914	1.11585		0.299794	-0.387986	0.683297	2.23249	+	0.0257797	1.08886	NaN	NaN		NaN	NaN	25.1366	25.1867	24.9323	24.9705	24.7806	24.8087	25.7839	25.9353	25.5863	NaN	NaN	NaN	NaN	NaN	NaN
758	9	9	35.9	39.32	0	52.346	9207900000	109	P04637-4;P04637;P04637-5;P04637-6;P04637-2;P04637-3;P04637-7;P04637-8;P04637-9	P04637-4;P04637;P04637-5;P04637-6;P04637-2;P04637-3;P04637-7	Cellular tumor antigen p53	TP53			-0.231632	1.15485		0.297588	-0.389743	-0.238698	1.262		0.200496	-0.405424	NaN	NaN		NaN	NaN	29.1853	29.4461	29.3541	29.0119	29.0778	29.2008	29.1683	29.0894	29.0116	NaN	NaN	NaN	NaN	NaN	NaN
109	22	22	47.8	67.764	0	94.429	5041400000	139	O00186	O00186	Syntaxin-binding protein 3	STXBP3			-0.231625	1.32677		0.284045	-0.398179	-0.110182	0.540018		0.578347	-0.186725	0.252998	0.466381		0.35047	0.344366	28.0147	27.9546	27.9359	27.5925	27.7566	27.8612	27.8388	28.0174	27.7183	28.1208	28.1025	28.5023	28.2148	28.8703	28.3995
2928	3	3	6	61.45	0.0002266	4.2408	171850000	15	Q6UWY0	Q6UWY0	Arylsulfatase K	ARSK			-0.231524	0.409518		0.410188	-0.312836	0.0564842	0.167989		0.805084	0.0901037	NaN	NaN		NaN	NaN	23.5433	23.5075	23.4276	22.8735	23.2172	23.6931	23.3368	23.76	23.5511	NaN	NaN	NaN	NaN	NaN	NaN
1743	43	43	63	87.301	0	323.31	175880000000	1691	P54886;P54886-2	P54886;P54886-2	Delta-1-pyrroline-5-carboxylate synthase;Glutamate 5-kinase;Gamma-glutamyl phosphate reductase	ALDH18A1	Known	+	-0.231171	3.37311		0.233439	-0.443287	0.00200017	0.0234265		0.987891	0.00378435	0.0851351	0.713984		0.665872	0.153539	33.3495	33.2984	33.2931	33.0696	33.106	33.0718	33.2961	33.291	33.3599	32.4257	32.4136	32.3232	32.4971	32.3875	32.5333
4862	34	34	29.7	185.54	0	121.79	1870600000	119	Q9ULH0-2;Q9ULH0-4;Q9ULH0;Q9ULH0-3;Q9ULH0-5	Q9ULH0-2;Q9ULH0-4;Q9ULH0;Q9ULH0-3	Kinase D-interacting substrate of 220 kDa	KIDINS220			-0.230756	0.544802		0.374094	-0.335783	-0.980658	3.13488	+	0.00817391	-1.62079	-0.259624	1.60591		0.22753	-0.452253	26.4958	26.4899	26.4856	26.1007	26.0456	26.6327	25.4097	25.7197	25.3999	27.8648	27.809	27.7079	27.4262	27.5513	27.6254
1934	10	4	59.8	20.987	0	66.395	3879100000	45	P62834	P62834	Ras-related protein Rap-1A	RAP1A			-0.230652	1.33538		0.28553	-0.397121	-0.144466	0.787648		0.445952	-0.247101	0.333398	1.28092		0.154427	0.535955	27.9196	27.8257	27.7661	27.4783	27.635	27.7062	27.6384	27.8351	27.6045	27.075	27.0837	26.9999	27.1494	27.5269	27.4826
4669	5	5	69.1	6.2484	0	21.214	3835200000	79	Q9P0U1	Q9P0U1	Mitochondrial import receptor subunit TOM7 homolog	TOMM7	Known	+	-0.230616	0.195022		0.537884	-0.241728	-0.0621707	0.0727094		0.836628	-0.0777333	-0.312951	0.337605		0.335967	-0.354464	27.4087	26.6974	26.9816	25.9921	27.1535	27.2504	26.7974	27.3981	26.7057	28.5101	29.3115	29.173	29.2679	28.4354	28.3525
1372	144	2	65.4	229	0	323.31	1721000000	56	P35580;P35580-3;P35580-5;REV__Q8IYT3;Q9Y623;P11055;Q9UKX2	P35580;P35580-3;P35580-5	Myosin-10	MYH10	Predicted		-0.230607	0.741472		0.334786	-0.358819	-0.390345	1.34568		0.0752456	-0.614096	NaN	NaN		NaN	NaN	25.6011	25.8817	26.043	25.4898	25.6708	25.6733	25.4987	25.4874	25.3687	NaN	NaN	NaN	NaN	NaN	NaN
1916	7	7	60	20.082	0	68.08	3770300000	113	P62330	P62330	ADP-ribosylation factor 6	ARF6			-0.230606	0.685943		0.345318	-0.35318	-0.207609	0.382117		0.378202	-0.285008	0.396724	0.88771		0.139545	0.560134	27.3409	27.2871	27.5915	26.9432	27.2359	27.3486	27.0489	27.6105	26.9374	28.1036	28.252	28.2483	28.3841	29.0027	28.4072
4616	44	43	44.7	174.97	0	238.77	10765000000	302	Q9NYU2-2;Q9NYU2	Q9NYU2-2;Q9NYU2	UDP-glucose:glycoprotein glucosyltransferase 1	UGGT1			-0.229899	1.68896		0.271174	-0.409224	0.226505	2.0092		0.192781	0.412655	0.273355	2.26554		0.185382	0.497054	29.0598	29.0545	28.9812	28.7307	28.7619	28.9132	29.2047	29.3407	29.2295	29.1338	29.0974	29.2233	29.3751	29.4876	29.4118
2924	2	2	32.3	10.081	0	69.658	1051400000	53	Q6UW78	Q6UW78	Ubiquinol-cytochrome-c reductase complex assembly factor 3	UQCC3	Known		-0.229444	1.01592		0.308682	-0.378618	-0.567753	2.47581	+	0.0251908	-0.9609	NaN	NaN		NaN	NaN	26.3948	26.1417	26.2766	25.9328	26.1898	26.0021	25.7794	25.599	25.7314	NaN	NaN	NaN	NaN	NaN	NaN
5130	26	24	59.7	56.578	0	157	4868700000	186	Q9Y6G9	Q9Y6G9	Cytoplasmic dynein 1 light intermediate chain 1	DYNC1LI1			-0.229276	2.01991		0.263388	-0.417514	-0.40916	0.951047		0.0829883	-0.583399	0.493738	1.08547		0.081896	0.69166	27.2956	27.171	27.1807	26.9735	26.9449	27.0411	26.4639	27.1474	26.8086	29.4763	29.0518	29.4517	29.5196	30.0828	29.8587
806	17	17	49.2	52.948	0	96.448	12903000000	231	P07099	P07099	Epoxide hydrolase 1	EPHX1			-0.229157	0.946528		0.315628	-0.373663	0.776707	4.71523	+	0.012	1.4573	-0.603343	0.208373		0.31603	-0.372256	29.3738	29.4008	29.3428	29.0211	29.0418	29.3671	30.1091	30.2041	30.1343	28.3504	24.7274	25.4651	25.2141	25.8176	25.7012
3674	10	10	36.5	34.358	0	28.569	2258600000	77	Q96E29-3;Q96E29-2;Q96E29	Q96E29-3;Q96E29-2;Q96E29	Transcription termination factor 3, mitochondrial	MTERF3	Known		-0.229098	0.763474		0.335169	-0.359048	-0.448252	2.22089	+	0.0411634	-0.767177	0.0523071	0.376417		0.79313	0.0936901	26.8295	26.9999	26.9283	26.5985	26.5272	26.9447	26.4577	26.5953	26.3598	26.8469	26.8638	26.7324	26.8973	26.7852	26.9175
2003	3	3	19.7	44.105	0.00023348	4.9451	352400000	15	P78381-4;P78381-5;P78381-2;P78381	P78381-4;P78381-5;P78381-2;P78381	UDP-galactose translocator	SLC35A2			-0.228966	0.637703		0.354907	-0.345898	-0.455421	1.25213		0.0579535	-0.700742	NaN	NaN		NaN	NaN	24.6888	24.2972	24.4138	24.0724	24.1869	24.4536	24.0164	NaN	24.0059	NaN	NaN	NaN	NaN	NaN	NaN
1755	13	13	47.8	20.7	0	57.792	13382000000	303	P55145	P55145	Mesencephalic astrocyte-derived neurotrophic factor	MANF			-0.22878	2.2263		0.258766	-0.421427	0.0534414	0.32313		0.797037	0.0941053	0.105479	0.280624		0.648608	0.161956	29.4915	29.5053	29.4266	29.2615	29.1781	29.2974	29.4566	29.6544	29.4728	29.4489	29.3017	29.5181	29.2767	29.7488	29.5596
4461	5	5	32.8	22.252	0	16.775	932200000	41	Q9NR77	Q9NR77	Peroxisomal membrane protein 2	PXMP2	Predicted	+	-0.228743	2.81092		0.248735	-0.431768	0.199675	3.12629		0.224161	0.382887	NaN	NaN		NaN	NaN	25.8667	25.8574	25.8333	25.6628	25.5693	25.6391	26.014	26.0705	26.0719	NaN	NaN	NaN	NaN	NaN	NaN
581	5	5	13	70.1	0.00024552	6.0902	508240000	9	O94923	O94923	D-glucuronyl C5-epimerase	GLCE			-0.22785	0.436687		0.412845	-0.318941	0.128356	0.374456		0.548421	0.199403	NaN	NaN		NaN	NaN	24.8601	25.098	25.2671	24.6449	NaN	25.0496	25.1828	25.0729	25.3546	NaN	NaN	NaN	NaN	NaN	NaN
2295	7	7	3.6	260.32	0	10.905	394210000	13	Q13439-3;Q13439-4;Q13439;Q13439-5	Q13439-3;Q13439-4;Q13439;Q13439-5	Golgin subfamily A member 4	GOLGA4			-0.226843	1.24653		0.302797	-0.39446	-0.22606	0.703791		0.280565	-0.365221	NaN	NaN		NaN	NaN	NaN	22.2375	22.2135	21.9067	21.9842	22.1051	21.8811	22.1178	NaN	NaN	NaN	NaN	NaN	NaN	NaN
3287	3	3	15.4	42.689	0	25.889	837800000	27	Q8NAN2-2;Q8NAN2	Q8NAN2-2;Q8NAN2	Protein FAM73A	FAM73A	Predicted		-0.226678	1.13571		0.305621	-0.3817	0.0382366	0.162588		0.866248	0.0649816	NaN	NaN		NaN	NaN	25.6201	25.7907	25.9072	25.6195	25.4702	25.5483	25.8594	25.8157	25.7577	NaN	NaN	NaN	NaN	NaN	NaN
1357	23	23	82	29.804	0	320.57	359910000000	2136	P35232;P35232-2	P35232	Prohibitin	PHB	Known	+	-0.226462	1.97994		0.268555	-0.411863	-0.0431277	0.242668		0.84059	-0.0756434	0.146887	0.939671		0.483613	0.2563	34.231	34.2423	34.1954	33.9173	33.9895	34.0825	34.1298	34.3156	34.0939	33.9246	33.9997	34.122	34.2345	34.1731	34.0793
3002	7	7	11.2	100.23	0	20.375	1486800000	28	Q7Z2K6;Q7Z2K6-2	Q7Z2K6;Q7Z2K6-2	Endoplasmic reticulum metallopeptidase 1	ERMP1			-0.226386	1.59351		0.281738	-0.400563	0.0454979	0.712191		0.81435	0.0859775	NaN	NaN		NaN	NaN	26.5435	26.542	26.5995	26.3719	26.2137	26.4202	26.5775	26.5933	26.6507	NaN	NaN	NaN	NaN	NaN	NaN
3977	9	9	53.8	28	0	50.757	2704600000	58	Q9BSH5	Q9BSH5	Haloacid dehalogenase-like hydrolase domain-containing protein 3	HDHD3	Known	+	-0.226287	1.04107		0.311943	-0.375832	0.197339	1.46741		0.267637	0.350894	-0.305208	0.944291		0.209242	-0.468684	26.9023	26.9409	26.949	26.8978	26.5566	26.659	27.0752	27.2491	27.0598	27.5257	27.2803	27.767	27.1113	27.2476	27.2984
2729	5	5	54.4	9.4275	0	129.69	14239000000	129	Q5JTJ3-3;Q5JTJ3;Q5JTJ3-2	Q5JTJ3-3;Q5JTJ3;Q5JTJ3-2	Cytochrome c oxidase assembly factor 6 homolog	COA6	Known	+	-0.226002	2.46059		0.258678	-0.421243	0.408713	3.73189	+	0.0400289	0.770055	-0.399542	1.70856		0.0907932	-0.659408	29.5878	29.6263	29.5758	29.3454	29.3301	29.4364	29.9832	29.9743	30.0585	28.349	28.5211	28.3396	28.1484	27.8447	28.018
3360	4	4	68.5	16.39	0	85.467	2814100000	41	Q8NI22;Q8NI22-2;Q8NI22-3	Q8NI22;Q8NI22-2;Q8NI22-3	Multiple coagulation factor deficiency protein 2	MCFD2			-0.22598	0.668691		0.355218	-0.34591	-0.224946	0.547067		0.300347	-0.329906	-0.176035	0.105472		0.654675	-0.161717	27.3044	27.0315	26.9028	26.6609	26.9256	26.9743	26.6014	27.0764	26.8861	27.4779	27.6045	27.8465	NaN	28.234	26.6999
5032	8	8	60.3	19.193	0	151.08	5366500000	179	Q9Y3E5	Q9Y3E5	Peptidyl-tRNA hydrolase 2, mitochondrial	PTRH2	Known	+	-0.225196	0.866203		0.330455	-0.362668	-0.428361	1.6493		0.0545672	-0.692647	0.199863	0.992128		0.360316	0.336207	27.8438	27.8541	27.4939	27.5494	27.4638	27.5032	27.2976	27.3094	27.2998	29.3872	29.2666	29.1236	29.3699	29.5619	29.4452
4211	3	3	3.9	96.766	0.00022437	4.0675	219490000	5	Q9H1B5	Q9H1B5	Xylosyltransferase 2	XYLT2			-0.225111	0.520864		0.397008	-0.330679	-0.311885	1.12014		0.124377	-0.494318	NaN	NaN		NaN	NaN	23.9458	24.2027	23.859	23.6135	NaN	23.9413	23.5704	23.8437	23.6577	NaN	NaN	NaN	NaN	NaN	NaN
2291	9	9	7.6	144.31	0	17.453	404760000	15	Q13428-2;Q13428-8;Q13428;Q13428-3;Q13428-4;Q13428-6;Q13428-7;Q13428-5	Q13428-2;Q13428-8;Q13428;Q13428-3;Q13428-4;Q13428-6;Q13428-7;Q13428-5	Treacle protein	TCOF1			-0.22502	0.630534		0.36547	-0.340556	-0.61094	1.64125	+	0.0266051	-0.952524	NaN	NaN		NaN	NaN	24.5613	24.6664	24.3552	24.0488	24.3652	24.4938	24.0212	NaN	23.8122	NaN	NaN	NaN	NaN	NaN	NaN
3744	23	23	42.1	103.08	0	239.82	9402100000	258	Q96HY7	Q96HY7	Probable 2-oxoglutarate dehydrogenase E1 component DHKTD1, mitochondrial	DHTKD1	Known	+	-0.225016	0.763238		0.344658	-0.353995	0.0854708	0.697076		0.65731	0.153757	0.370206	1.73671		0.106455	0.620933	28.8123	28.8455	28.8905	28.3716	28.8265	28.6751	28.8543	29.0296	28.9207	28.9105	28.9361	28.9404	29.1105	29.4221	29.3649
1029	13	13	29.3	62.081	0	46.185	11408000000	193	P15586;P15586-2	P15586;P15586-2	N-acetylglucosamine-6-sulfatase	GNS			-0.225011	2.04002		0.270437	-0.410907	0.127603	1.57758		0.464235	0.237549	0.146526	1.19837		0.471061	0.262841	29.3463	29.3087	29.2866	29.1774	29.0458	29.0433	29.3785	29.4566	29.4892	28.4936	28.3187	28.3996	28.4957	28.5775	28.5783
3940	3	3	45.7	9.8745	0	11.916	1485100000	30	Q9BQB6-3;Q9BQB6-2;Q9BQB6	Q9BQB6-3;Q9BQB6-2;Q9BQB6	Vitamin K epoxide reductase complex subunit 1	VKORC1			-0.224191	0.369188		0.435321	-0.297313	0.337578	1.35196		0.0965915	0.547375	NaN	NaN		NaN	NaN	26.3229	26.5016	26.2215	25.7112	26.5442	26.118	26.6446	26.8466	26.5675	NaN	NaN	NaN	NaN	NaN	NaN
4314	17	17	59.7	41.943	0	176	11166000000	216	Q9H7Z7	Q9H7Z7	Prostaglandin E synthase 2;Prostaglandin E synthase 2 truncated form	PTGES2	Known	+	-0.223444	2.31227		0.266781	-0.414066	0.332502	3.41765		0.068487	0.627233	0.223588	1.65072		0.285415	0.398014	28.8524	28.7535	28.7961	28.6267	28.5728	28.5322	29.1271	29.121	29.1513	29.8204	29.752	29.6886	29.9554	29.9061	30.0703
3305	16	16	65.9	40.744	0	323.31	31134000000	369	Q8NBU5;Q8NBU5-2	Q8NBU5;Q8NBU5-2	ATPase family AAA domain-containing protein 1	ATAD1	Predicted	+	-0.223422	2.79839		0.257829	-0.422099	0.0391305	0.313018		0.850636	0.0710063	0.245524	1.22757		0.269568	0.413374	30.684	30.7062	30.7622	30.4589	30.5167	30.5066	30.7395	30.8425	30.6878	30.3504	30.3022	30.1329	30.5123	30.6206	30.3891
3900	5	5	35.4	25.127	0	16.275	1964600000	37	Q99720;Q99720-4;Q99720-5;Q99720-3;Q99720-2	Q99720;Q99720-4;Q99720-5;Q99720-3;Q99720-2	Sigma non-opioid intracellular receptor 1	SIGMAR1			-0.223367	1.64982		0.284412	-0.397636	-0.0348632	0.189426		0.872784	-0.0611184	NaN	NaN		NaN	NaN	27.107	27.0335	26.9334	26.7626	26.7684	26.8728	26.9041	27.0748	26.9903	NaN	NaN	NaN	NaN	NaN	NaN
1815	17	17	41.6	52.22	0	77.463	3380400000	150	P60228	P60228	Eukaryotic translation initiation factor 3 subunit E	EIF3E			-0.222687	0.538222		0.391279	-0.326243	-0.57998	1.63156	+	0.0293118	-0.875546	0.410503	1.17474		0.108166	0.617948	27.1303	27.2174	27.2101	26.6046	27.1076	27.1775	26.2862	26.7546	26.7771	28.1837	28.4967	28.6081	28.6319	28.9541	28.9341
515	3	3	18.2	24.074	0	27.893	5000800000	117	O75629	O75629	Protein CREG1	CREG1			-0.222099	1.33656		0.304368	-0.384427	-0.429647	2.32353	+	0.0451574	-0.746347	NaN	NaN		NaN	NaN	28.489	28.3419	28.5317	28.3359	28.1918	28.1686	28.1209	27.9592	27.9935	NaN	NaN	NaN	NaN	NaN	NaN
2621	5	5	68.1	13.37	0	50.323	2211300000	73	Q16864;Q16864-2	Q16864;Q16864-2	V-type proton ATPase subunit F	ATP6V1F			-0.221542	1.64984		0.288636	-0.394742	-0.255698	1.3641		0.172031	-0.435181	0.19894	0.613499		0.401033	0.308165	26.7747	26.7084	26.8507	26.6101	26.5929	26.4662	26.4907	26.4069	26.6691	27.2531	27.1522	26.9923	27.1411	27.5649	27.2884
640	11	11	23.6	63.523	0	24.203	1567900000	56	O95470	O95470	Sphingosine-1-phosphate lyase 1	SGPL1			-0.221379	1.58071		0.292599	-0.392288	0.120419	1.25325		0.496784	0.220911	0.387446	0.907077		0.142808	0.554017	26.3997	26.4207	26.3254	26.2696	26.0745	26.1375	26.4354	26.5513	26.5203	26.5301	26.0126	26.2997	26.8018	26.7979	26.405
2567	13	2	61.5	24.488	0	89.811	1452500000	38	Q15907;Q15907-2	Q15907;Q15907-2	Ras-related protein Rab-11B	RAB11B	Predicted		-0.221253	1.31476		0.306362	-0.382255	0.0790825	0.325383		0.706297	0.131834	NaN	NaN		NaN	NaN	26.5183	26.3574	26.4188	26.1762	26.1216	26.333	26.5044	26.6663	26.361	NaN	NaN	NaN	NaN	NaN	NaN
4554	5	5	29.7	28.338	0	25.759	1654600000	51	Q9NVZ3;Q9NVZ3-2;Q9NVZ3-3;Q9NVZ3-4	Q9NVZ3;Q9NVZ3-2;Q9NVZ3-3;Q9NVZ3-4	Adaptin ear-binding coat-associated protein 2	NECAP2			-0.221066	1.24589		0.308584	-0.378986	-0.215317	0.930626		0.263405	-0.354055	0.030009	0.0528713		0.903923	0.0431537	26.6901	26.5565	26.4057	26.32	26.3122	26.357	26.203	26.4426	26.3608	26.2038	26.3628	26.4396	26.0502	26.6829	26.3631
1215	8	8	36.5	24.261	0	39.576	21768000000	189	P26373;P26373-2	P26373;P26373-2	60S ribosomal protein L13	RPL13			-0.220818	1.26043		0.308516	-0.37927	-0.493177	2.95788	+	0.0288246	-0.882647	0.427673	1.39893		0.0901283	0.665621	29.5709	29.5341	29.5781	29.1782	29.4265	29.4159	29.0501	29.1745	28.979	31.3329	31.3014	31.3806	31.5004	31.979	31.8185
4737	11	11	26.4	88.754	0	57.96	3393100000	48	Q9UBV2;Q9UBV2-2	Q9UBV2	Protein sel-1 homolog 1	SEL1L			-0.220424	1.02914		0.324677	-0.367025	-0.188824	0.828348		0.333945	-0.311761	NaN	NaN		NaN	NaN	27.8923	27.8967	27.6627	27.5017	27.5692	27.7194	27.5404	27.5735	27.7712	NaN	NaN	NaN	NaN	NaN	NaN
2679	4	4	11	46.43	0	8.8427	676050000	21	Q4ZIN3-2;Q4ZIN3	Q4ZIN3-2;Q4ZIN3	Membralin	TMEM259			-0.219425	1.1673		0.315962	-0.372924	-0.0721378	0.628449		0.70968	-0.13076	NaN	NaN		NaN	NaN	25.541	25.4657	25.4853	25.1195	25.3016	25.4127	25.3721	25.5179	25.3857	NaN	NaN	NaN	NaN	NaN	NaN
241	7	7	37.3	37.92	0	111.29	3420900000	110	O15126;O15126-2	O15126;O15126-2	Secretory carrier-associated membrane protein 1	SCAMP1			-0.219369	0.642304		0.37433	-0.335334	-0.534093	3.14514	+	0.025046	-0.95911	0.437953	1.5635		0.0812197	0.696406	27.568	27.6356	27.513	27.1148	27.3136	27.6301	27.1213	27.0237	26.9693	27.4551	27.6076	27.6141	27.8617	28.2319	27.8971
3133	16	16	43.1	54.705	0	242.28	17723000000	287	Q8IV08	Q8IV08	Phospholipase D3	PLD3			-0.219079	0.973788		0.331879	-0.361869	-0.683652	3.89801	+	0.0165269	-1.25055	0.19886	3.88904		0.298295	0.38715	29.9011	29.8405	29.9594	29.8416	29.4985	29.7036	29.2799	29.1874	29.1828	30.5176	30.5045	30.5001	30.6811	30.7197	30.718
1695	8	8	59.1	21.348	0	120.28	77956000000	350	P52815	P52815	39S ribosomal protein L12, mitochondrial	MRPL12	Known	+	-0.218864	2.57025		0.270377	-0.410606	-0.0441297	0.672189		0.820417	-0.0832955	0.343706	1.79282		0.125859	0.58663	32.1028	32.0619	32.022	31.8901	31.8179	31.822	31.9887	32.0131	32.0524	31.4082	31.6326	31.6699	31.9661	31.8804	31.8954
739	20	20	47.6	59.755	0	93.83	5063500000	124	P04040	P04040	Catalase	CAT		+	-0.218591	1.11947		0.321461	-0.36935	0.0199979	0.0839476		0.92346	0.0342226	-0.110476	0.573839		0.594664	-0.188628	28.1262	28.1028	27.8628	27.7895	27.7627	27.8839	28.0567	28.0392	28.0559	28.1307	27.8947	28.0212	27.8635	27.8435	28.0082
2057	29	29	34.5	141.45	0	127.19	5795600000	221	Q00341;Q00341-2	Q00341;Q00341-2	Vigilin	HDLBP			-0.218288	0.981685		0.331748	-0.36127	-0.324387	2.47286		0.0816501	-0.58765	0.358344	1.95948		0.108086	0.617874	28.4032	28.3273	28.2635	27.9969	28.0386	28.3037	27.95	28.0635	28.0073	28.3247	28.3074	28.2296	28.5376	28.7883	28.6108
1905	11	11	53.3	17.718	0	39.499	16601000000	192	P62269	P62269	40S ribosomal protein S18	RPS18	Predicted	+	-0.217705	0.850306		0.346981	-0.351742	-0.832258	1.41932	+	0.0252245	-1.07667	0.814234	1.53524	+	0.0466061	1.09344	28.5022	28.4459	28.3601	27.996	28.3143	28.3447	27.4795	28.1207	27.2111	30.8975	30.9563	31.5271	31.6686	32.1314	32.0237
564	6	3	12.5	53.059	0.00043668	3.5942	2234200000	18	O94788-2;O94788;O94788-4;O94788-3	O94788-2;O94788;O94788-4;O94788-3	Retinal dehydrogenase 2	ALDH1A2			-0.217478	1.23776		0.316394	-0.373345	0.0271091	0.0671228		0.910952	0.042299	NaN	NaN		NaN	NaN	27.2227	27.3116	27.0675	26.9005	27.0183	27.0306	27.2845	27.404	26.9947	NaN	NaN	NaN	NaN	NaN	NaN
1936	3	3	29.2	15.069	0	14.748	5842300000	97	P62847-2;P62847-3;P62847;P62847-4	P62847-2;P62847-3;P62847;P62847-4	40S ribosomal protein S24	RPS24			-0.217445	0.714499		0.365536	-0.340249	-0.488784	1.43821	+	0.0455667	-0.742817	0.494951	1.49568		0.0685032	0.757759	27.4097	27.2963	27.5407	26.9707	27.3772	27.2464	26.8066	27.2084	26.7652	29.671	29.5916	29.7128	29.9138	30.4266	30.1198
816	21	21	67.8	38.604	0	323.31	55306000000	405	P07355;P07355-2;A6NMY6	P07355;P07355-2;A6NMY6	Annexin A2;Putative annexin A2-like protein	ANXA2;ANXA2P2	Predicted		-0.217154	0.731281		0.364299	-0.341417	-0.207329	2.06612		0.22545	-0.381747	NaN	NaN		NaN	NaN	31.9289	31.8623	31.8835	31.4282	31.7033	31.8918	31.6479	31.7609	31.6439	NaN	NaN	NaN	NaN	NaN	NaN
2920	5	5	14.5	62.7	0	11.093	527820000	22	Q6UVY6-2;Q6UVY6	Q6UVY6-2;Q6UVY6	DBH-like monooxygenase protein 1	MOXD1			-0.216925	0.49874		0.408421	-0.314412	0.40941	1.09017		0.0762637	0.605129	NaN	NaN		NaN	NaN	25.1717	24.8555	24.8881	24.4348	24.8806	24.9491	25.3231	25.6567	25.1637	NaN	NaN	NaN	NaN	NaN	NaN
1148	12	12	79.2	24.449	0	137.63	8909400000	144	P21964-2;P21964	P21964-2;P21964	Catechol O-methyltransferase	COMT	Predicted	+	-0.21658	0.722179		0.365634	-0.33989	0.028553	0.0474232		0.912367	0.0404323	0.257554	0.376527		0.37378	0.327266	29.0389	29.0932	28.7857	28.5693	28.791	28.9077	28.6844	29.3188	29.0002	27.8548	28.1298	27.8399	28.3269	27.6788	28.5914
3660	8	8	63.8	12.498	0	42.262	3344100000	83	Q96DA6;Q96DA6-2	Q96DA6;Q96DA6-2	Mitochondrial import inner membrane translocase subunit TIM14	DNAJC19	Known	+	-0.215562	2.70415		0.273766	-0.406755	-0.0772095	0.740956		0.681914	-0.140944	NaN	NaN		NaN	NaN	27.1261	27.2009	27.2018	26.9798	26.9741	26.9282	27.0384	27.1764	27.0824	NaN	NaN	NaN	NaN	NaN	NaN
1031	14	14	51.9	31.324	0	98.002	26489000000	299	P15880	P15880	40S ribosomal protein S2	RPS2			-0.215356	0.329213		0.467573	-0.279962	-0.653694	1.99779	+	0.0234812	-1.01791	0.349422	1.45304		0.132571	0.571242	29.9652	29.8857	29.9902	29.1977	29.9733	30.0241	29.1439	29.5704	29.1658	31.878	31.7894	31.6903	31.9505	32.2822	32.1733
520	26	26	32.2	149.01	0	106.95	2305700000	96	O75694-2;O75694	O75694-2;O75694	Nuclear pore complex protein Nup155	NUP155			-0.215107	0.933671		0.344349	-0.353964	0.983278	3.74366	+	0.00883019	1.71455	0.861496	1.32708	+	0.0456632	1.07172	26.2762	26.4562	26.4785	26.3065	26.2394	26.0197	27.3161	27.4105	27.4342	26.5279	26.866	26.5845	27.1048	28.0671	27.391
5062	41	40	50.3	88.583	0	323.31	38861000000	538	Q9Y4W6	Q9Y4W6	AFG3-like protein 2	AFG3L2	Known	+	-0.215054	4.91456		0.256983	-0.423222	0.23116	3.38428		0.16504	0.443389	-0.0081927	0.0796751		0.957265	-0.0152771	30.9377	30.9219	30.9214	30.7231	30.7107	30.702	31.1624	31.1916	31.1204	30.9348	30.8783	30.888	30.9558	30.8591	30.8616
1641	17	17	80.2	23.489	0	323.31	32404000000	370	P51149	P51149	Ras-related protein Rab-7a	RAB7A			-0.214275	1.73277		0.302863	-0.385497	-0.299647	2.03771		0.104172	-0.531781	0.124742	0.902769		0.537077	0.220991	30.7004	30.6367	30.5714	30.3741	30.3868	30.5048	30.262	30.4351	30.3125	31.3871	31.315	31.3052	31.369	31.5709	31.4415
1171	31	31	71.2	65.443	0	323.31	82154000000	873	P23368;P23368-2;Q16798-2;Q16798	P23368;P23368-2	NAD-dependent malic enzyme, mitochondrial	ME2	Known		-0.214208	3.7567		0.265885	-0.415222	0.00570424	0.116408		0.972791	0.0110159	0.145298	1.37957		0.468635	0.264584	32.0795	32.0835	32.0908	31.8766	31.8937	31.8409	32.1115	32.1039	32.0556	31.9555	32.0214	31.9466	32.0568	32.1002	32.2023
2521	5	5	22	33.2	0	18.984	1058700000	42	Q15390-2;Q15390	Q15390-2;Q15390	Mitochondrial fission regulator 1	MTFR1	Known	+	-0.213161	1.67599		0.305992	-0.382129	0.0496419	0.471031		0.803411	0.0909765	NaN	NaN		NaN	NaN	26.0398	26.1256	26.0915	25.7909	25.857	25.9696	26.0926	26.2116	26.1016	NaN	NaN	NaN	NaN	NaN	NaN
4949	18	18	48.6	57.563	0	131.06	2150200000	107	Q9Y285;Q9Y285-2	Q9Y285;Q9Y285-2	Phenylalanine--tRNA ligase alpha subunit	FARSA			-0.211357	0.373376		0.45405	-0.286698	-0.147607	0.510596		0.468244	-0.235547	0.738078	2.15637	+	0.0458824	1.14487	26.5843	26.7099	26.7133	25.9931	26.7282	26.6521	26.3775	26.7584	26.4288	27.0553	27.3962	27.3191	28.1306	28.0576	27.7965
1877	7	7	55	16.57	0	40.928	5246300000	91	P61916;P61916-2	P61916;P61916-2	Epididymal secretory protein E1	NPC2			-0.211231	1.12552		0.335386	-0.359077	0.30297	1.80146		0.106947	0.52666	NaN	NaN		NaN	NaN	27.3648	27.2173	27.2724	27.2164	27.0523	26.9521	27.4985	27.5586	27.7064	NaN	NaN	NaN	NaN	NaN	NaN
4944	19	19	70.4	47.534	0	292.36	7856000000	204	Q9Y276	Q9Y276	Mitochondrial chaperone BCS1	BCS1L	Known	+	-0.211191	1.46949		0.316091	-0.372691	0.377942	2.83524		0.0559348	0.689062	0.222371	1.06845		0.316372	0.37197	28.5517	28.4863	28.6208	28.38	28.4103	28.2348	28.9594	28.8728	28.9604	28.3472	28.5644	28.3193	28.7481	28.5484	28.6016
2289	47	47	45.5	113.89	0	323.31	79837000000	889	Q13423	Q13423	NAD(P) transhydrogenase, mitochondrial	NNT	Known	+	-0.210889	2.81985		0.282096	-0.399934	0.0281245	0.518305		0.886472	0.0536909	-0.292974	2.71824		0.150892	-0.54218	32.1079	32.1756	32.1724	31.953	31.9092	31.9611	32.1971	32.1769	32.1663	31.6764	31.6467	31.6529	31.4345	31.2982	31.3644
1716	6	6	33.8	17.018	0	11.804	1613200000	40	P53680;P53680-2	P53680;P53680-2	AP-2 complex subunit sigma	AP2S1			-0.210786	0.501574		0.416717	-0.308317	-0.397654	1.33063		0.071422	-0.621479	0.395299	1.13269		0.121025	0.595218	26.4907	26.0489	26.2651	25.8689	25.9914	26.3121	25.9249	25.756	25.9308	27.0472	26.7844	27.2587	27.3055	27.6019	27.369
2442	12	12	22.3	70.702	0	83.893	14333000000	197	Q14739	Q14739	Lamin-B receptor	LBR			-0.210641	1.69238		0.308624	-0.378524	-0.0504761	0.240666		0.812802	-0.086626	0.619439	0.593649		0.0977643	0.640945	29.8791	29.7778	29.7448	29.5282	29.5783	29.6634	29.6981	29.8927	29.6596	27.3517	27.1408	27.3661	27.1619	27.8065	28.7486
1174	18	18	77.4	26.688	0	97.459	25145000000	409	P23396;P23396-2	P23396;P23396-2	40S ribosomal protein S3	RPS3	Known		-0.210402	0.806499		0.366687	-0.339	-0.597418	3.12182	+	0.0246	-1.05832	0.394048	1.28394		0.111427	0.611959	29.2811	29.1898	29.239	28.8086	29.0572	29.2129	28.5931	28.7561	28.5685	31.9099	31.906	31.9457	32.059	32.5549	32.3297
837	7	7	8.9	154.79	0	25.89	969750000	24	P08069	P08069	Insulin-like growth factor 1 receptor;Insulin-like growth factor 1 receptor alpha chain;Insulin-like growth factor 1 receptor beta chain	IGF1R			-0.209773	0.442182		0.43443	-0.298106	-0.413348	2.12939		0.0525333	-0.709658	NaN	NaN		NaN	NaN	26.1082	26.0832	26.0173	25.4992	25.8828	26.1974	25.5196	25.7893	25.6598	NaN	NaN	NaN	NaN	NaN	NaN
273	7	7	53.6	27.4	0	110.95	4862400000	77	O15400-2;O15400	O15400-2;O15400	Syntaxin-7	STX7			-0.209631	0.874518		0.362671	-0.342764	-0.0756118	0.575333		0.698002	-0.135381	1.23045	0.772302	+	0.0510851	1.04108	28.3109	28.2616	28.2483	28.2487	27.8683	28.0749	28.1605	28.3069	28.1265	25.0166	25.2343	25.1114	NaN	25.4429	27.2595
3572	35	35	18	290.46	0	134.44	2029500000	114	Q93008-1;Q93008;O00507;O00507-2	Q93008-1;Q93008	Probable ubiquitin carboxyl-terminal hydrolase FAF-X	USP9X			-0.209625	0.274894		0.507847	-0.260064	0.151856	0.325688		0.499735	0.21957	0.81672	1.06551	+	0.0509356	0.949406	25.3679	25.3169	24.9342	24.5813	25.5133	24.8955	25.221	25.6264	25.2272	27.9589	28.507	27.8611	28.382	29.413	28.9822
2617	15	15	72	34.293	0	323.31	55084000000	494	Q16836;Q16836-3;Q16836-2	Q16836;Q16836-3;Q16836-2	Hydroxyacyl-coenzyme A dehydrogenase, mitochondrial	HADH	Known	+	-0.209543	1.84006		0.307548	-0.380507	-0.0784321	0.880852		0.673628	-0.14485	-0.103357	0.943479		0.597242	-0.187498	31.6753	31.5582	31.6631	31.3979	31.3794	31.4907	31.5568	31.584	31.5206	31.2539	31.1261	31.097	31.0887	31.0486	31.0297
2346	29	29	54.6	63.664	0	323.31	29328000000	520	Q13740-2;Q13740;Q13740-4;Q13740-3	Q13740-2;Q13740	CD166 antigen	ALCAM			-0.209195	0.71037		0.383567	-0.329705	-0.474748	1.7145	+	0.0421463	-0.759208	0.775577	2.82539	+	0.0431045	1.29242	30.0577	29.8823	30.0485	29.5549	29.8388	29.9672	29.4468	29.7409	29.3765	31.7451	31.6861	31.8995	32.4006	32.6535	32.6033
2533	27	24	54.9	86.478	0	250.02	4454600000	164	Q15437	Q15437	Protein transport protein Sec23B	SEC23B			-0.208853	0.627375		0.397949	-0.321386	-0.33987	2.55295		0.0741323	-0.615885	0.561454	1.09522		0.0683562	0.757658	27.5948	27.4594	27.449	27.1211	27.1809	27.5748	27.1434	27.2049	27.1354	28.5748	28.4411	28.7671	28.7337	29.4844	29.2493
4011	8	8	19.1	54.066	0	16.797	1572500000	54	Q9BTY2;Q9BTY2-2	Q9BTY2	Plasma alpha-L-fucosidase	FUCA2			-0.208264	1.91252		0.307484	-0.38007	0.129477	1.21843		0.468487	0.235443	NaN	NaN		NaN	NaN	26.5929	26.6743	26.5158	26.4103	26.3875	26.3604	26.7385	26.7486	26.6842	NaN	NaN	NaN	NaN	NaN	NaN
4970	5	5	4.7	166.63	0	10.862	453550000	12	Q9Y2I1;Q9Y2I1-4;Q9Y2I1-3;Q9Y2I1-2	Q9Y2I1;Q9Y2I1-4;Q9Y2I1-3	Nischarin	NISCH			-0.208179	0.820514		0.371053	-0.337123	-0.464523	1.35173		0.0535282	-0.703136	NaN	NaN		NaN	NaN	25.2517	24.8451	25.0357	24.8391	24.8296	24.8392	24.4223	24.7904	24.5262	NaN	NaN	NaN	NaN	NaN	NaN
2064	8	8	44.6	25.177	0	77.047	5110600000	106	Q00688	Q00688	Peptidyl-prolyl cis-trans isomerase FKBP3	FKBP3			-0.20814	0.534997		0.415327	-0.309943	0.0251052	0.0835778		0.912222	0.0414054	0.409343	1.41934		0.0964969	0.645379	28.1493	27.9678	28.1603	27.7942	27.6639	28.1949	27.9716	28.2696	28.1115	27.8507	27.7375	27.8557	27.9847	28.4254	28.2619
580	4	4	12.8	55.016	0	9.1424	670140000	16	O94919	O94919	Endonuclease domain-containing 1 protein	ENDOD1			-0.207957	0.657532		0.396756	-0.323328	0.380544	1.8956		0.0635597	0.646474	NaN	NaN		NaN	NaN	25.054	25.1942	25.3438	24.8841	24.8626	25.2214	25.6158	25.5976	25.5202	NaN	NaN	NaN	NaN	NaN	NaN
1800	18	18	27.5	114.16	0	286.93	7923800000	112	P57737-3;P57737-4;P57737;P57737-2;Q9Y3D7	P57737-3;P57737-4;P57737;P57737-2	Coronin-7	CORO7			-0.20778	1.84532		0.309495	-0.377723	-0.00760778	0.0457623		0.967053	-0.0136624	0.486173	2.49875		0.0555014	0.843032	28.8871	28.7246	28.7905	28.5631	28.5946	28.6213	28.7795	28.8536	28.7463	28.0773	28.3014	28.2973	28.6891	28.7515	28.6938
872	12	11	40.9	24.893	0	70.331	14315000000	232	P09429;B2RPK0;P23497	P09429;B2RPK0	High mobility group protein B1;Putative high mobility group protein B1-like 1	HMGB1;HMGB1P1			-0.207658	0.486655		0.426812	-0.302839	-0.440227	0.920682		0.0757772	-0.608589	0.516254	0.924266		0.0860494	0.67841	29.1403	29.2122	29.4308	29.2142	28.7257	29.2205	28.4104	29.0056	29.0467	30.0899	30.4698	30.7627	30.6098	31.1205	31.1408
3777	7	7	28.3	44.772	0	38.446	754000000	30	Q96K37;Q96K37-2	Q96K37;Q96K37-2	Solute carrier family 35 member E1	SLC35E1	Predicted		-0.207333	0.334325		0.476163	-0.274323	-0.0606486	0.139804		0.802706	-0.0918188	NaN	NaN		NaN	NaN	24.8952	25.0763	24.7058	24.3837	24.5295	25.1421	24.5938	24.9279	24.9735	NaN	NaN	NaN	NaN	NaN	NaN
1038	6	6	20.6	37.277	0	21.018	2640100000	57	P16070-18;P16070-12;P16070-14;P16070-13;P16070-11;P16070-10;P16070-16;P16070-8;P16070-17;P16070-6;P16070-4;P16070-3;P16070-7;P16070-5;P16070;P16070-15;P16070-9;P16070-19	P16070-18;P16070-12;P16070-14;P16070-13;P16070-11;P16070-10;P16070-16;P16070-8;P16070-17;P16070-6;P16070-4;P16070-3;P16070-7;P16070-5;P16070;P16070-15;P16070-9	CD44 antigen	CD44			-0.207294	1.10101		0.346682	-0.352224	0.45831	2.81242	+	0.0331779	0.818968	NaN	NaN		NaN	NaN	27.3207	27.2065	27.2875	26.9869	26.9781	27.2277	27.7213	27.8187	27.6495	NaN	NaN	NaN	NaN	NaN	NaN
2762	20	20	42.6	65.505	0	68.364	3842300000	96	Q5T160	Q5T160	Probable arginine--tRNA ligase, mitochondrial	RARS2	Known	+	-0.206228	0.545992		0.415432	-0.309186	-0.587657	2.6283	+	0.0241812	-1.00358	0.148604	0.256748		0.568798	0.203523	27.4777	27.428	27.6537	27.5137	27.0146	27.4124	26.8396	27.0168	26.94	27.864	28.4328	28.0519	28.2412	28.0037	28.5496
1579	17	17	36.2	58.777	0	61.209	3431600000	148	P49591	P49591	Serine--tRNA ligase, cytoplasmic	SARS			-0.205533	0.654139		0.398524	-0.320069	-0.404948	1.47793		0.0636193	-0.645837	0.234376	0.828568		0.316654	0.371362	27.6044	27.5491	27.3415	27.0649	27.3573	27.4563	26.9335	27.2734	27.0734	28.2694	28.0554	28.075	28.225	28.5884	28.2895
1208	10	10	51.7	29.483	0	213	2290800000	85	P25789;P25789-2	P25789;P25789-2	Proteasome subunit alpha type-4	PSMA4			-0.205486	0.205252		0.552241	-0.231718	-0.428237	0.840785		0.0835935	-0.581536	0.544523	1.42068		0.06279	0.80263	26.1168	25.828	26.129	25.0715	26.2174	26.1684	25.2022	25.9421	25.6447	28.3107	28.3504	28.4167	28.6066	29.2148	28.89
850	2	2	1.3	167.55	0.00043659	3.591	273560000	7	P08572	P08572	Collagen alpha-2(IV) chain;Canstatin	COL4A2			-0.204775	0.978652		0.365401	-0.347635	NaN	NaN		NaN	NaN	NaN	NaN		NaN	NaN	24.3391	24.5407	24.3336	NaN	24.2184	24.1809	24.4095	NaN	NaN	NaN	NaN	NaN	NaN	NaN	NaN
2263	8	8	25.8	57.579	0	60.043	1283800000	43	Q13217	Q13217	DnaJ homolog subfamily C member 3	DNAJC3			-0.20448	0.901353		0.370464	-0.337521	-0.147402	0.594141		0.457972	-0.24128	NaN	NaN		NaN	NaN	26.6151	26.2861	26.4286	26.2388	26.1589	26.3187	26.1835	26.3373	26.3668	NaN	NaN	NaN	NaN	NaN	NaN
1821	4	4	51.1	15.614	0	18.368	1210200000	40	P60604-2;P60604	P60604-2;P60604	Ubiquitin-conjugating enzyme E2 G2	UBE2G2			-0.20432	1.56476		0.328459	-0.364812	-0.418607	2.21948	+	0.0500032	-0.723252	NaN	NaN		NaN	NaN	26.4443	26.3338	26.2445	26.1306	26.1675	26.1117	25.9393	26.0053	25.8222	NaN	NaN	NaN	NaN	NaN	NaN
2912	13	13	23.1	63.514	0	46.404	2477100000	52	Q6PML9	Q6PML9	Zinc transporter 9	SLC30A9	Known	+	-0.203951	0.67567		0.398569	-0.320132	0.212046	1.09125		0.255652	0.358573	-0.282422	0.598168		0.286603	-0.39707	27.101	26.9114	27.0263	26.6098	27.0409	26.7762	27.0832	27.3248	27.2669	27.3115	27.4539	27.103	26.8206	27.3772	26.8233
3210	11	11	57.4	19.856	0	96.749	16655000000	193	Q8N183	Q8N183	Mimitin, mitochondrial	NDUFAF2	Known	+	-0.203806	2.52383		0.305906	-0.383344	0.0699526	0.97182		0.708681	0.131066	0.0367648	0.276751		0.850417	0.0664385	29.9713	29.959	30.0353	29.7927	29.7449	29.8165	30.0118	30.0918	30.0718	28.2667	28.402	28.4335	28.3806	28.4325	28.3993
1805	2	2	46.6	6.8862	0.00025961	7.6128	533850000	33	P58511	P58511	Small integral membrane protein 11	SMIM11			-0.203656	0.672759		0.399106	-0.319506	-0.466444	1.75972	+	0.0437453	-0.753197	NaN	NaN		NaN	NaN	25.3296	25.0606	25.4311	24.9072	25.161	25.1422	24.8187	24.7246	24.8788	NaN	NaN	NaN	NaN	NaN	NaN
1810	10	10	72	19.667	0	116	3938100000	105	P59998;P59998-3;P59998-2;P59998-4	P59998;P59998-3;P59998-2;P59998-4	Actin-related protein 2/3 complex subunit 4	ARPC4			-0.203063	0.239282		0.535671	-0.243385	-0.309689	0.416576		0.227913	-0.379303	0.452808	1.35198		0.0825057	0.689664	25.6954	25.1202	25.5963	24.8119	25.2037	25.787	24.8287	25.678	24.9761	29.3801	29.609	29.6785	29.7559	30.0997	30.1704
94	5	5	32.6	23.384	0	50.841	8388900000	140	Q13765;E9PAV3-2;E9PAV3;Q9BZK3	Q13765;E9PAV3-2;E9PAV3	Nascent polypeptide-associated complex subunit alpha;Nascent polypeptide-associated complex subunit alpha, muscle-specific form	NACA			-0.202338	0.509416		0.43065	-0.30022	-0.833595	3.12713	+	0.0111683	-1.41357	0.607267	2.49387	+	0.0493782	1.01875	28.8647	28.7569	28.8814	28.2952	28.8341	28.7667	27.8892	28.1577	27.9553	29.1553	29.135	29.1757	29.6847	29.9523	29.6508
4618	11	11	35.1	36.034	0	34.44	11947000000	155	Q9NZ01;Q9NZ01-2	Q9NZ01	Very-long-chain enoyl-CoA reductase	TECR			-0.202142	1.02861		0.3646	-0.341298	0.0882823	0.625986		0.65232	0.156677	0.212867	0.58535		0.381447	0.32142	29.3578	29.3413	29.1645	28.9887	29.0505	29.2179	29.3676	29.4037	29.3571	29.176	28.8951	29.1422	29.0335	29.5009	29.3175
1896	15	15	45.5	49.184	0	128.88	4282300000	123	P62191;P62191-2	P62191;P62191-2	26S protease regulatory subunit 4	PSMC1			-0.202001	0.754492		0.394832	-0.324216	-0.646922	3.16912	+	0.0243122	-1.13916	0.502925	1.58756		0.0640874	0.779234	27.4907	27.4105	27.3608	26.9863	27.3601	27.3096	26.8344	26.8257	26.6611	28.8246	28.9442	29.0392	29.2091	29.6646	29.4431
1712	25	25	35.8	107.14	0	120.58	2832300000	129	P53618	P53618	Coatomer subunit beta	COPB1			-0.201517	0.174145		0.579098	-0.214735	-0.252516	0.196997		0.43285	-0.254357	0.566271	1.39952		0.0593094	0.82233	24.7113	25.7241	24.5135	24.3978	24.7621	25.1844	24.5171	25.3592	24.315	28.9629	29.0398	29.0799	29.2959	29.9342	29.5514
654	4	4	12.4	51.417	0	27.72	755350000	48	O95674	O95674	Phosphatidate cytidylyltransferase 2	CDS2			-0.201269	0.579616		0.418685	-0.307399	0.061697	0.134297		0.802159	0.0921793	0.64764	1.24496		0.0526296	0.87019	25.0808	25.1456	24.724	24.8941	24.6218	24.8307	24.882	25.2472	25.0063	25.1822	25.8246	25.7799	26.102	26.5018	26.1258
1908	14	14	53.2	18.431	0	51.975	11715000000	171	P62280	P62280	40S ribosomal protein S11	RPS11			-0.200219	0.549422		0.426476	-0.302785	-0.500395	1.98762	+	0.0333142	-0.820881	0.295499	2.09746		0.161799	0.527497	28.2193	28.3836	28.3369	27.8369	28.3679	28.1343	27.87	27.9468	27.6218	30.8286	30.783	30.8812	31.0905	31.2309	31.0578
3311	24	24	56.7	43.135	0	192.3	17825000000	330	Q8NC51-3;Q8NC51-4;Q8NC51;Q8NC51-2	Q8NC51-3;Q8NC51-4;Q8NC51;Q8NC51-2	Plasminogen activator inhibitor 1 RNA-binding protein	SERBP1			-0.200212	0.499807		0.4367	-0.296617	-0.683506	2.94633	+	0.0225567	-1.17443	0.670101	1.32196		0.0506212	0.908845	29.4341	29.3301	29.539	28.9267	29.2878	29.4881	28.6848	28.8613	28.7066	30.7479	31.0086	31.0302	31.2308	31.9895	31.5767
1313	19	19	68	44.868	0	277.06	10761000000	241	P31689;P31689-2	P31689;P31689-2	DnaJ homolog subfamily A member 1	DNAJA1	Predicted		-0.200097	0.608529		0.415471	-0.309052	-0.517191	2.06371	+	0.030381	-0.851058	0.403585	2.17907		0.0808693	0.698291	28.7011	28.6228	28.6598	28.1704	28.589	28.624	28.0421	28.3546	28.0355	30.2879	30.3295	30.327	30.7262	30.8473	30.5816
2994	3	2	6.6	60.207	0.00024184	5.7093	289180000	16	Q7L5N7	Q7L5N7	Lysophosphatidylcholine acyltransferase 2	LPCAT2			-0.199706	0.68658		0.410753	-0.320018	0.239757	1.40627		0.199285	0.436758	NaN	NaN		NaN	NaN	NaN	24.201	24.1243	23.8363	23.9071	24.1454	NaN	24.4328	24.372	NaN	NaN	NaN	NaN	NaN	NaN
778	10	9	93	11.665	0	219.31	33317000000	294	P05387;P05386-2	P05387	60S acidic ribosomal protein P2	RPLP2	Predicted		-0.199602	0.738069		0.398368	-0.31987	-0.347685	2.04		0.0759461	-0.606206	0.312962	1.09429		0.188045	0.493265	30.8084	30.7396	30.675	30.3219	30.5765	30.7258	30.3076	30.5153	30.3571	31.122	31.1318	31.1258	31.1985	31.6632	31.4569
2371	15	15	40.6	54.29	0	316.51	20241000000	286	Q14108;Q14108-2	Q14108;Q14108-2	Lysosome membrane protein 2	SCARB2			-0.199326	2.03975		0.324623	-0.367645	-0.136491	1.70433		0.432631	-0.254509	-0.151434	0.997991		0.468158	-0.265129	29.7682	29.7615	29.778	29.6453	29.5005	29.5639	29.5609	29.6728	29.6644	31.135	31.1457	31.0294	30.8971	31.0732	30.8855
3807	3	3	26.1	19.76	0	49.783	143800000	16	Q96NT0;Q96NT0-2	Q96NT0	Coiled-coil domain-containing protein 115	CCDC115			-0.199067	0.440421		0.454137	-0.286861	0.412917	0.998317		0.0788852	0.594978	NaN	NaN		NaN	NaN	22.2029	22.1354	21.6536	21.6286	21.8439	21.9221	22.4824	22.2353	22.5128	NaN	NaN	NaN	NaN	NaN	NaN
4267	4	4	11.6	47.61	0	10.376	366000000	18	Q9H490-2;Q9H490	Q9H490-2;Q9H490	Phosphatidylinositol glycan anchor biosynthesis class U protein	PIGU			-0.198734	0.480281		0.443782	-0.292363	0.0986977	0.230064		0.669748	0.147718	NaN	NaN		NaN	NaN	24.2884	24.3686	23.9507	23.8173	23.9499	24.2443	24.1401	24.2547	24.509	NaN	NaN	NaN	NaN	NaN	NaN
960	20	6	63.8	33.064	0	52.55	15837000000	161	P12235	P12235	ADP/ATP translocase 1	SLC25A4	Known	+	-0.198301	2.48144		0.316102	-0.373011	-2.37615	6.27935	+	0	-4.39297	0.0233714	0.127581		0.905929	0.0412064	30.1588	30.1067	30.1504	29.9125	29.9138	29.9947	27.7415	27.8355	27.7105	29.9064	29.7394	29.8256	29.8497	29.7649	29.9269
1856	10	4	59.8	20.825	0	100.21	10271000000	122	P61224;P61224-3;P61224-2;A6NIZ1;P61224-4	P61224;P61224-3;P61224-2;A6NIZ1;P61224-4	Ras-related protein Rap-1b;Ras-related protein Rap-1b-like protein	RAP1B			-0.197956	1.85009		0.331755	-0.361522	-0.281269	2.25961		0.117272	-0.509921	0.262087	1.89356		0.210406	0.467065	29.2401	29.232	29.197	28.9344	29.0607	29.0801	28.8996	29.0411	28.8846	28.7067	28.588	28.7589	28.9005	29.0138	28.9254
623	10	10	24.2	63.083	0	44.919	1119600000	39	O95302;O95302-3;O95302-2	O95302;O95302-3	Peptidyl-prolyl cis-trans isomerase FKBP9	FKBP9			-0.197097	0.489027		0.445217	-0.291769	0.486409	1.1767		0.0538452	0.700521	-0.246813	0.4364		0.364711	-0.332467	25.6212	25.5091	25.0913	25.1097	25.1775	25.3431	25.9661	26.0345	25.6802	26.9031	26.3486	26.6079	26.4494	26.0268	26.6429
914	29	24	23.4	211.68	0	83.077	3049400000	87	P10586-2;P10586	P10586-2;P10586	Receptor-type tyrosine-protein phosphatase F	PTPRF			-0.197027	0.266414		0.525653	-0.24766	-0.746746	2.2102	+	0.0241224	-1.16427	0.691195	1.16353		0.0527893	0.886899	27.5518	27.2416	27.1552	26.6333	27.5658	27.1583	26.4568	26.7092	26.5422	26.8078	27.5144	27.1144	27.4564	28.0204	28.0335
4997	16	16	36.7	77.3	0	54.832	2139400000	92	Q9Y2Z2-4;Q9Y2Z2-6;Q9Y2Z2;Q9Y2Z2-5;Q9Y2Z2-2;Q9Y2Z2-3	Q9Y2Z2-4;Q9Y2Z2-6;Q9Y2Z2;Q9Y2Z2-5;Q9Y2Z2-2;Q9Y2Z2-3	Protein MTO1 homolog, mitochondrial	MTO1	Known	+	-0.196229	0.27344		0.522834	-0.249082	-0.692071	1.608	+	0.0234969	-0.992725	0.987436	1.33439	+	0.0455567	1.16687	27.3609	26.8229	27.0751	27.1572	26.4065	27.1065	26.4891	26.1534	26.5401	26.2731	25.1937	25.5753	26.3853	26.8148	26.8044
1939	2	2	30.4	7.8409	0	8.3087	5625500000	46	P62857	P62857	40S ribosomal protein S28	RPS28			-0.196149	0.590956		0.42699	-0.302563	-0.535459	2.51991	+	0.0268114	-0.917878	0.430294	1.38709		0.0893686	0.667411	27.546	27.517	27.6938	27.1141	27.5158	27.5383	26.9931	27.1757	26.9815	29.3199	29.2661	29.2975	29.4729	29.9712	29.7302
2297	5	5	10.4	72.359	0	10.617	341680000	20	Q13443-2;Q13443	Q13443-2;Q13443	Disintegrin and metalloproteinase domain-containing protein 9	ADAM9			-0.195845	0.441945		0.461334	-0.283731	-0.264643	0.913946		0.188049	-0.41663	NaN	NaN		NaN	NaN	24.6894	24.5325	24.3944	24.0052	24.5472	24.4763	24.3238	24.4259	24.0726	NaN	NaN	NaN	NaN	NaN	NaN
4227	3	3	31.2	10.438	0	51.572	1083400000	33	Q9H299	Q9H299	SH3 domain-binding glutamic acid-rich-like protein 3	SH3BGRL3			-0.195386	0.385566		0.481714	-0.277005	NaN	NaN		NaN	NaN	0.663951	0.762639		0.0724576	0.737284	24.8609	24.6937	24.4189	24.3009	24.624	NaN	NaN	NaN	NaN	26.5858	27.7078	27.7443	27.7593	28.1575	28.1129
25	12	12	44	46.121	0	38.351	1231600000	31	A6NJ78;A6NJ78-2;A6NJ78-4;P0C7V9;A6NJ78-3	A6NJ78;A6NJ78-2;A6NJ78-4;P0C7V9	Probable methyltransferase-like protein 15;Putative methyltransferase-like protein 15P1	METTL15;METTL15P1	Known	+	-0.195081	1.47988		0.352714	-0.347678	-0.241858	1.3275		0.19235	-0.413239	NaN	NaN		NaN	NaN	26.2613	26.3689	26.2089	26.161	26.0594	26.0334	26.1468	25.9043	26.0624	NaN	NaN	NaN	NaN	NaN	NaN
5134	5	5	24.6	34.188	0	15.143	691560000	24	Q9Y6I9	Q9Y6I9	Testis-expressed sequence 264 protein	TEX264			-0.194775	0.850405		0.397824	-0.3212	0.316174	1.66285		0.10027	0.539015	NaN	NaN		NaN	NaN	25.5092	25.3027	25.285	25.0215	25.2867	25.2044	25.6119	25.7741	25.6594	NaN	NaN	NaN	NaN	NaN	NaN
1508	34	33	56.9	82.593	0	292.27	15281000000	383	P46459;P46459-2	P46459;P46459-2	Vesicle-fusing ATPase	NSF			-0.19474	1.18396		0.371155	-0.337313	0.0860907	0.669418		0.657719	0.15419	0.347235	2.55879		0.102862	0.62817	29.7044	29.5792	29.5761	29.2966	29.4755	29.5033	29.6418	29.7801	29.696	29.7711	29.6996	29.7365	30.03	30.18	30.0389
1827	5	5	29.4	13.373	0	14.384	10226000000	89	P60866;P60866-2	P60866;P60866-2	40S ribosomal protein S20	RPS20			-0.194582	0.517143		0.443349	-0.292544	-0.491946	1.27624	+	0.0499233	-0.722598	0.269562	1.14739		0.237566	0.441555	29.3465	29.0234	29.1627	28.7464	29.2178	28.9846	28.6994	28.9464	28.411	29.593	29.6235	29.5498	29.7865	30.0714	29.7171
3651	21	21	54.5	49.389	0	164.57	8600000000	190	Q96CW1-2;Q96CW1	Q96CW1-2;Q96CW1	AP-2 complex subunit mu	AP2M1	Predicted		-0.194457	1.25655		0.365559	-0.339583	-0.237887	1.42385		0.193158	-0.411742	0.47926	1.69919		0.066687	0.76329	28.8791	28.7366	28.6781	28.5122	28.548	28.6503	28.5429	28.6038	28.4335	29.2821	29.4535	29.379	29.6576	30.0644	29.8303
1897	24	23	64.3	44.784	0	224.81	3747000000	177	P62195-2;P62195	P62195-2;P62195	26S protease regulatory subunit 8	PSMC5			-0.194143	0.449843		0.461611	-0.28311	-0.717345	2.16173	+	0.0266604	-1.12062	0.532939	1.5555		0.0619974	0.810242	26.0783	26.0106	26.2173	25.5658	26.1468	26.0112	25.3734	25.6088	25.172	29.1576	29.4253	29.4591	29.7122	30.1262	29.8024
4356	7	7	21	50.83	0	35.593	1814900000	41	Q9HB40;Q9HB40-2	Q9HB40;Q9HB40-2	Retinoid-inducible serine carboxypeptidase	SCPEP1			-0.193761	1.52802		0.354136	-0.346911	-0.302709	1.38607		0.119753	-0.502929	-0.260178	0.686343		0.298399	-0.386902	26.3266	26.3359	26.445	26.2476	26.1844	26.0942	26.1126	25.8846	26.2022	27.2652	26.9962	27.1445	26.8446	27.1557	26.6251
3633	12	12	46.9	38.078	0	98.676	7772300000	129	Q96BW9-3;Q96BW9;Q96BW9-2	Q96BW9-3;Q96BW9;Q96BW9-2	Phosphatidate cytidylyltransferase, mitochondrial	TAMM41	Known	+	-0.193431	1.43414		0.360657	-0.343738	-0.157306	2.19406		0.357701	-0.296751	-0.244322	0.0679593		0.693238	-0.139205	29.0087	28.9495	28.9122	28.765	28.8596	28.6654	28.8206	28.7853	28.7925	25.4993	26.5122	25.9937	24.6964	28.1919	24.3839
985	43	42	59.7	72.932	0	323.31	75231000000	832	P13667	P13667	Protein disulfide-isomerase A4	PDIA4			-0.193421	0.913646		0.396511	-0.32299	0.186335	0.961758		0.32573	0.315435	-0.0102208	0.0346716		0.954142	-0.0170437	32.024	31.9235	31.8446	31.6079	31.7087	31.8951	31.979	32.2343	32.1377	31.3672	31.2475	31.4521	31.1866	31.4435	31.4059
2691	24	24	65.9	47.137	0	323.31	56678000000	567	Q53H12;Q53H12-2	Q53H12	Acylglycerol kinase, mitochondrial	AGK	Known	+	-0.193186	2.93348		0.321286	-0.369131	0.252851	4.32313		0.124945	0.49243	0.11721	1.84913		0.534843	0.221913	31.4991	31.5262	31.5317	31.3675	31.3104	31.2996	31.7646	31.7897	31.7613	31.1959	31.1701	31.1097	31.2612	31.2666	31.2995
1598	44	37	20.8	358.2	0	118.35	4921300000	131	P49792;A6NKT7;Q7Z3J3;Q99666;O14715;P0DJD0;Q99666-2;Q7Z3J3-2	P49792	E3 SUMO-protein ligase RanBP2	RANBP2			-0.19296	0.56466		0.437685	-0.296056	0.786967	3.34579	+	0.0099823	1.37017	0.640724	0.258377		0.249555	0.430902	27.7973	27.805	27.6167	27.2953	27.5706	27.7741	28.5376	28.5928	28.4494	28.1465	25.1848	27.0977	26.5598	27.6274	28.164
819	21	21	48.1	58.112	0	115.7	51104000000	576	P07602;P07602-2;P07602-3	P07602;P07602-2;P07602-3	Prosaposin;Saposin-A;Saposin-B-Val;Saposin-B;Saposin-C;Saposin-D	PSAP	Predicted		-0.192903	1.66847		0.350943	-0.349076	0.0386314	0.214709		0.86047	0.0677858	0.0883147	0.407483		0.673249	0.149188	31.4883	31.432	31.4583	31.3624	31.1936	31.244	31.3677	31.5965	31.5303	31.0053	30.972	30.9209	31.2095	30.9025	31.0511
954	29	18	53.9	70.67	0	309.36	10616000000	240	P11940;P11940-2;Q9H361;Q4VXU2;Q4VXU2-2	P11940;P11940-2;Q9H361	Polyadenylate-binding protein 1;Polyadenylate-binding protein 3	PABPC1;PABPC3			-0.192646	1.16575		0.377161	-0.333467	-0.609792	3.5448	+	0.0267455	-1.10625	0.231668	1.08887		0.299672	0.386094	29.0952	29.095	29.0305	28.798	28.8148	29.0299	28.4142	28.5566	28.4204	29.7658	29.7747	29.8102	29.8608	30.2001	29.9848
4861	12	12	20.8	94.131	0	52.19	1315000000	83	Q9ULF5;Q9ULF5-2	Q9ULF5	Zinc transporter ZIP10	SLC39A10			-0.192155	0.685152		0.421275	-0.306188	-0.0966212	0.229514		0.672389	-0.145305	0.421098	2.11464		0.0755705	0.720051	25.7682	25.9119	25.8996	25.4767	25.6403	25.8862	25.7649	26.0368	25.4881	26.6065	26.4394	26.6527	27.061	26.8804	27.0206
3980	38	38	46.3	122.85	0	323.31	24480000000	597	Q9BSJ8;Q9BSJ8-2	Q9BSJ8;Q9BSJ8-2	Extended synaptotagmin-1	ESYT1			-0.191765	1.21321		0.376599	-0.333926	-0.0289656	0.155469		0.893089	-0.0508428	0.145988	0.773813		0.493322	0.248736	30.3889	30.3187	30.1967	30.0869	30.0392	30.203	30.1901	30.3077	30.3196	30.1847	30.1712	30.2972	30.2703	30.5169	30.304
3166	2	2	11	36.305	0.00024558	6.0917	417560000	13	Q8IXU6-3;Q8IXU6	Q8IXU6-3;Q8IXU6	Solute carrier family 35 member F2	SLC35F2			-0.191451	0.697132		0.426972	-0.310196	NaN	NaN		NaN	NaN	NaN	NaN		NaN	NaN	25.0554	25.043	24.9114	24.6763	NaN	24.9473	24.6469	NaN	NaN	NaN	NaN	NaN	NaN	NaN	NaN
3491	3	3	4.1	75.251	0.0010638	3.1341	100660000	4	Q8WZA1;Q8WZA1-2	Q8WZA1;Q8WZA1-2	Protein O-linked-mannose beta-1,2-N-acetylglucosaminyltransferase 1	POMGNT1			-0.191103	0.682093		0.426703	-0.308506	-0.189079	0.477578		0.384338	-0.281431	NaN	NaN		NaN	NaN	22.996	22.9672	22.8538	NaN	22.6063	22.8894	22.5217	23.0735	22.6545	NaN	NaN	NaN	NaN	NaN	NaN
3464	7	7	14.3	73.011	0	24.921	1559400000	54	Q8WWI5-3;Q8WWI5-2;Q8WWI5	Q8WWI5-3;Q8WWI5-2;Q8WWI5	Choline transporter-like protein 1	SLC44A1	Known		-0.190646	1.13735		0.384368	-0.329365	-0.646023	2.26056	+	0.0243824	-1.04462	-0.320972	1.18487		0.173035	-0.51163	26.5164	26.443	26.2668	26.2011	26.1821	26.271	25.8047	25.8976	25.5858	26.486	26.4123	26.1737	26.0516	26.1765	25.881
1515	13	13	49.5	22.591	0	37.524	20575000000	224	P46781	P46781	40S ribosomal protein S9	RPS9	Predicted		-0.190442	1.03734		0.393516	-0.324863	-0.626737	2.96805	+	0.0263377	-1.09149	0.332143	1.30559		0.154047	0.536417	29.2049	29.2668	29.2474	28.9266	29.2107	29.0105	28.4949	28.7431	28.6009	31.6173	31.6197	31.576	31.7225	32.131	31.956
1723	20	20	30.5	118.32	0	130.74	3669700000	162	P53992;P53992-2	P53992	Protein transport protein Sec24C	SEC24C			-0.190424	0.474187		0.463105	-0.282472	-0.44862	1.56994		0.0526927	-0.710526	0.492496	0.992115		0.088547	0.672093	27.5787	27.4411	27.4941	27.0608	27.246	27.6358	26.8431	27.2764	27.0485	28.2683	28.014	28.3309	28.3351	29.0681	28.6875
3461	6	6	22	32.544	0	19.155	5934400000	103	Q8WWC4	Q8WWC4	Uncharacterized protein C2orf47, mitochondrial	C2orf47	Known	+	-0.190198	1.84187		0.351564	-0.348376	0.356529	3.19141		0.0602333	0.664021	0.14027	0.968889		0.495505	0.247034	28.2737	28.1834	28.2827	28.0977	27.9906	28.0809	28.5955	28.6391	28.5749	27.6663	27.8582	27.8142	27.8537	27.9327	27.9731
1423	23	23	55.6	46.108	0	241.64	35566000000	430	P39023;Q92901	P39023	60S ribosomal protein L3	RPL3	Predicted		-0.190143	1.28778		0.376545	-0.334038	-0.575195	3.75101	+	0.024695	-1.05967	0.387758	1.51016		0.103825	0.626722	30.6411	30.6299	30.6395	30.3103	30.5346	30.4951	30.0067	30.1456	30.0325	31.7904	31.8777	31.9252	32.0468	32.4321	32.2776
496	10	10	26	60.103	0	42.617	1427800000	48	O75475;O75475-3;O75475-2	O75475;O75475-3;O75475-2	PC4 and SFRS1-interacting protein	PSIP1			-0.189434	0.27186		0.535255	-0.243102	-0.11441	0.530941		0.565967	-0.192314	1.07025	1.79547	+	0.0360417	1.3954	26.2081	26.2259	25.9906	25.4145	26.2225	26.2193	25.9834	26.1408	25.9571	26.9579	26.675	26.6967	27.5743	28.3483	27.6179
821	2	2	11.1	37.564	0	38.96	765660000	25	P07711	P07711	Cathepsin L1;Cathepsin L1 heavy chain;Cathepsin L1 light chain	CTSL			-0.189403	1.03966		0.396969	-0.323451	0.874718	2.7183	+	0.0109515	1.40968	NaN	NaN		NaN	NaN	24.8893	25.1001	25.0976	24.7962	24.9382	24.7844	26.065	25.9202	25.726	NaN	NaN	NaN	NaN	NaN	25.6306
5077	3	3	37.9	11.586	0	23.626	1502000000	29	Q9Y5J6	Q9Y5J6	Mitochondrial import inner membrane translocase subunit Tim10 B	TIMM10B	Known	+	-0.189348	0.627429		0.435252	-0.297789	-0.674394	2.48356	+	0.0272407	-1.11029	-0.45229	0.406257		0.216506	-0.474181	26.3109	26.6019	26.5564	26.4858	26.1364	26.279	25.931	25.7496	25.7654	26.6539	26.2436	26.6646	26.628	25.5088	NaN
1511	6	6	28.4	16.561	0	21.784	16930000000	153	P46776	P46776	60S ribosomal protein L27a	RPL27A			-0.189076	0.728673		0.421385	-0.305539	-0.431208	2.9357	+	0.0377603	-0.781091	0.410991	1.44981		0.0950915	0.65062	29.8143	29.8249	29.8998	29.4329	29.7203	29.8187	29.3468	29.4989	29.3997	30.1756	30.1389	30.1892	30.3462	30.7989	30.5916
1486	40	40	61.9	80.852	0	282.35	26268000000	497	P43304;P43304-2	P43304;P43304-2	Glycerol-3-phosphate dehydrogenase, mitochondrial	GPD2	Known	+	-0.188868	1.85017		0.355424	-0.346308	0.363944	4.30622		0.0537636	0.700445	-0.168933	0.654825		0.455461	-0.273917	30.5133	30.4464	30.4811	30.3456	30.3177	30.2109	30.8431	30.8502	30.8393	29.3856	29.2426	29.2123	29.2114	28.9037	29.2186
2986	75	75	74.4	136.11	0	323.31	69704000000	1256	Q7L2E3-2;Q7L2E3-3;Q7L2E3	Q7L2E3-2;Q7L2E3-3;Q7L2E3	Putative ATP-dependent RNA helicase DHX30	DHX30	Known	+	-0.188571	3.8364		0.32473	-0.367336	0.0884151	1.51296		0.623635	0.167767	-0.0179195	0.166948		0.924796	-0.0331551	31.7918	31.8108	31.8096	31.6149	31.5953	31.6363	31.933	31.8432	31.9012	31.8322	31.7825	31.7825	31.7568	31.8537	31.7329
1949	10	10	42.4	28.024	0	201.55	16790000000	157	P62917	P62917	60S ribosomal protein L8	RPL8	Predicted		-0.18741	0.95087		0.405172	-0.316444	-0.474194	1.62877	+	0.0443618	-0.749047	0.291866	0.540946		0.288889	0.395345	29.5299	29.4488	29.4818	29.1389	29.3124	29.447	28.7962	29.2486	28.9932	30.5621	31.0463	30.9825	31.103	31.4964	30.8671
4611	4	4	32.2	15.769	0	15.143	2082400000	40	Q9NYL4-2;Q9NYL4	Q9NYL4-2;Q9NYL4	Peptidyl-prolyl cis-trans isomerase FKBP11	FKBP11	Predicted		-0.187242	1.21907		0.388961	-0.327252	0.0573235	0.433218		0.77571	0.10298	NaN	NaN		NaN	NaN	27.1023	27.0219	27.1188	26.7641	26.9408	26.9764	27.0526	27.219	27.1434	NaN	NaN	NaN	NaN	NaN	NaN
1431	7	7	30.5	23.577	0	24.133	10721000000	118	P40429;Q6NVV1	P40429;Q6NVV1	60S ribosomal protein L13a;Putative 60S ribosomal protein L13a protein RPL13AP3	RPL13A;RPL13AP3			-0.186872	0.699985		0.430136	-0.30057	-0.573235	2.42888	+	0.0250962	-0.964285	0.718216	0.515911		0.0962381	0.646579	28.8369	28.8729	28.7228	28.4079	28.6745	28.7895	28.1091	28.3927	28.2111	30.6793	29.2371	29.3757	30.7793	29.6857	30.9818
488	7	7	47.8	21.142	0	18.703	789300000	29	O75414;O75414-2	O75414	Nucleoside diphosphate kinase 6	NME6	Known	+	-0.186533	0.343412		0.511702	-0.257321	-0.165405	0.317609		0.472749	-0.231902	0.0584037	0.164496		0.795688	0.0921681	25.5913	25.0264	25.5669	24.9597	25.3911	25.2742	25.0677	25.4322	25.1885	25.3873	25.3459	25.5441	25.7158	25.3189	25.4179
3679	2	2	7.6	31.479	0.00024857	6.3518	194490000	9	Q96EF6	Q96EF6	F-box only protein 17	FBXO17			-0.186492	0.376914		0.499695	-0.263548	-0.523579	0.950502		0.0551845	-0.712483	NaN	NaN		NaN	NaN	24.0394	23.6958	23.7773	23.353	23.6253	23.9746	NaN	23.5729	23.0549	NaN	NaN	NaN	NaN	NaN	NaN
4832	15	7	12.8	150.36	0	8.7003	5089600000	9	Q9UKE5-6;Q9UKE5-2;Q9UKE5-4;Q9UKE5;Q9UKE5-8;Q9UKE5-5;Q9UKE5-7;Q9UKE5-3	Q9UKE5-6;Q9UKE5-2;Q9UKE5-4;Q9UKE5;Q9UKE5-8;Q9UKE5-5;Q9UKE5-7;Q9UKE5-3	TRAF2 and NCK-interacting protein kinase	TNIK			-0.186457	0.448711		0.48138	-0.277779	-0.254388	0.859615		0.207934	-0.398986	NaN	NaN		NaN	NaN	28.6185	28.2252	28.3292	NaN	28.0984	28.3107	28.2344	28.1777	27.9977	NaN	NaN	NaN	NaN	NaN	NaN
4631	14	12	30.7	63.48	0	67.12	4680800000	96	Q9NZI8;Q9NZI8-2;REV__Q15833;Q15517	Q9NZI8;Q9NZI8-2	Insulin-like growth factor 2 mRNA-binding protein 1	IGF2BP1			-0.185488	0.778122		0.42501	-0.304137	-0.280197	1.90418		0.123115	-0.496017	NaN	NaN		NaN	NaN	28.4083	28.3348	28.3207	27.9928	28.1537	28.3607	28.021	28.1921	28.0101	NaN	NaN	NaN	NaN	NaN	NaN
4287	22	22	65.9	45.348	0	107.32	12391000000	237	Q9H5Q4	Q9H5Q4	Dimethyladenosine transferase 2, mitochondrial	TFB2M	Known	+	-0.185452	1.81705		0.36595	-0.339918	0.790227	3.97857	+	0.0113939	1.43293	0.132564	1.62527		0.496286	0.246726	28.7753	28.7411	28.8807	28.6108	28.6456	28.5844	29.592	29.5364	29.6394	30.0398	29.9835	30.1084	30.1585	30.1808	30.19
2407	7	2	17.5	60.593	0	22.082	2248400000	32	Q14410	Q14410	Glycerol kinase 2	GK2	Predicted		-0.184506	0.857482		0.418687	-0.3075	-0.10774	0.605797		0.581296	-0.185853	NaN	NaN		NaN	NaN	27.1517	27.2501	27.0125	27.0629	26.9814	26.8165	27.1102	26.9954	26.9854	NaN	NaN	NaN	NaN	NaN	NaN
905	7	3	54.1	20.615	0	9.616	4012100000	56	P10114	P10114	Ras-related protein Rap-2a	RAP2A			-0.183496	0.93869		0.415159	-0.310265	-0.320785	1.70788		0.0964978	-0.54828	NaN	NaN		NaN	NaN	27.2552	27.204	27.1222	26.9466	26.9097	27.1745	26.7351	26.9962	26.8878	NaN	NaN	NaN	NaN	NaN	NaN
1422	10	10	52.4	16.06	0	38.638	10167000000	119	P39019	P39019	40S ribosomal protein S19	RPS19			-0.183356	0.491475		0.473862	-0.276727	-0.445869	1.90162	+	0.046313	-0.738877	0.408927	1.21383		0.106373	0.621186	29.0453	28.9501	29.1435	28.5625	28.966	29.0604	28.4618	28.7611	28.5784	29.5394	29.5604	29.806	29.7809	30.2108	30.1409
857	9	9	57	15.55	0	307.26	10400000000	131	P08708	P08708	40S ribosomal protein S17	RPS17			-0.183179	0.52979		0.466633	-0.280841	-0.437302	1.91947	+	0.0488788	-0.728548	0.706971	1.39805	+	0.0505578	0.960882	28.7545	28.643	28.656	28.2394	28.5122	28.7522	28.1201	28.4304	28.1911	29.7075	30.0633	30.1718	30.3309	30.9767	30.7559
2661	11	2	24.5	49.775	0	150.71	9912400000	93	Q3ZCM7	Q3ZCM7	Tubulin beta-8 chain	TUBB8			-0.182927	0.45115		0.482351	-0.271169	-0.245117	0.614699		0.253732	-0.360974	0.314749	0.815743		0.215101	0.463805	28.8458	28.8977	28.6213	28.3648	28.5629	28.8883	28.2437	28.7784	28.6074	30.1519	29.86	29.9749	30.0101	30.5411	30.3797
2136	20	20	43.8	68.01	0	88.077	1573500000	87	Q06124-2;Q06124;Q06124-3	Q06124-2;Q06124;Q06124-3	Tyrosine-protein phosphatase non-receptor type 11	PTPN11	Known		-0.181526	0.0828036		0.730284	-0.142321	-0.273406	0.102944		0.575165	-0.187854	0.824895	1.56361	+	0.0459836	1.11064	25.904	24.0511	23.9845	24.2304	23.8235	25.3411	23.5143	23.8034	25.8017	27.8089	27.9557	27.6813	28.2646	29.0562	28.5998
618	4	4	45.6	14.874	0	18.544	717220000	21	O95295	O95295	SNARE-associated protein Snapin	SNAPIN			-0.18089	0.53112		0.471302	-0.278283	-0.0131385	0.032839		0.951978	-0.0206892	0.377322	0.905829		0.150148	0.543393	25.012	25.4288	25.3367	25.0228	24.9746	25.2374	25.1846	25.2139	25.3394	25.1509	25.0764	24.9609	25.2114	25.8093	25.2995
2825	3	3	19.7	28.544	0	13.124	408340000	22	Q68CQ7-2;Q68CQ7	Q68CQ7-2;Q68CQ7	Glycosyltransferase 8 domain-containing protein 1	GLT8D1			-0.180429	1.16021		0.40767	-0.314814	-0.0262149	0.0620907		0.911877	-0.0407321	NaN	NaN		NaN	NaN	24.932	24.7528	24.7234	24.6184	24.567	24.6815	NaN	24.9326	24.6204	NaN	NaN	NaN	NaN	NaN	NaN
3983	3	3	12.7	27.082	0.00023529	5.0938	1226500000	32	Q9BSR8	Q9BSR8	Protein YIPF4	YIPF4			-0.179653	0.626479		0.462278	-0.288978	-0.448239	2.66345	+	0.0356265	-0.794941	NaN	NaN		NaN	NaN	26.3635	26.4305	26.2225	26.0352	NaN	26.2832	25.9027	25.9139	25.8553	NaN	NaN	NaN	NaN	NaN	NaN
865	10	10	45	44.292	0	68.052	2926400000	81	P09110;P09110-2	P09110;P09110-2	3-ketoacyl-CoA thiolase, peroxisomal	ACAA1	Predicted	+	-0.17963	0.758902		0.438542	-0.295034	0.20513	0.700813		0.309646	0.323816	-0.0552731	0.0532368		0.85574	-0.0644544	27.3196	27.1721	27.0446	26.8855	26.9728	27.1392	27.4271	27.5443	27.1803	27.0687	26.4672	27.5393	26.8246	27.3234	26.7614
1011	13	11	69.2	22.764	0	108.33	2259800000	74	P14649	P14649	Myosin light chain 6B	MYL6B			-0.17923	0.781067		0.437541	-0.295849	-0.188954	0.397184		0.405136	-0.269497	0.439562	1.43745		0.0849023	0.68448	26.2319	26.3099	25.9636	25.972	26.0171	25.9786	25.7623	26.3183	25.8579	28.1633	28.3507	28.3213	28.5476	28.9727	28.6338
1454	8	8	24.2	68.262	0	38.049	1407000000	37	P41743	P41743	Protein kinase C iota type	PRKCI			-0.179156	0.850343		0.431087	-0.299656	-0.165218	1.07273		0.371836	-0.288644	0.78113	1.53228	+	0.0457881	1.06243	26.3493	26.1708	26.1431	25.9352	26.1829	26.0078	25.9981	26.0584	26.1111	25.9197	25.9218	26.265	26.4422	26.8577	27.1499
5033	17	17	66.9	38.438	0	138.03	6539900000	208	Q9Y3F4;Q9Y3F4-2	Q9Y3F4;Q9Y3F4-2	Serine-threonine kinase receptor-associated protein	STRAP			-0.178676	0.527155		0.474855	-0.275246	-0.422717	1.35561		0.0614259	-0.654626	0.274505	1.16501		0.230269	0.449421	27.8418	27.8652	27.8602	27.3924	27.7431	27.8956	27.2107	27.7069	27.3813	29.6166	29.6891	29.7716	29.7784	30.1256	29.9969
3180	22	22	41.9	83.069	0	98.569	4323900000	136	Q8IYQ7	Q8IYQ7	Threonine synthase-like 1	THNSL1	Known	+	-0.178167	0.723905		0.446726	-0.290823	0.0130622	0.0480344		0.949662	0.0220205	0.0644811	0.071578		0.822265	0.0790664	27.9951	27.8779	28.1266	27.9403	27.6527	27.8721	28.0692	27.8943	28.0753	26.9965	26.4331	26.5263	26.8609	26.2063	27.0822
1300	22	19	55.5	57.206	0	316.59	47926000000	500	P30837	P30837	Aldehyde dehydrogenase X, mitochondrial	ALDH1B1	Known	+	-0.177886	2.27461		0.376654	-0.334173	0.0788651	1.5707		0.664057	0.150769	0.486256	4.06188		0.0507509	0.917165	31.473	31.4342	31.5001	31.3013	31.2419	31.3305	31.5429	31.5725	31.5285	29.4611	29.4577	29.3934	29.9341	29.8839	29.9531
2147	11	11	62.8	31.362	0	323.31	454380000000	3561	Q07021	Q07021	Complement component 1 Q subcomponent-binding protein, mitochondrial	C1QBP	Known	+	-0.177144	1.52293		0.398607	-0.319919	0.0451139	0.479508		0.820544	0.0834112	0.0645485	0.743281		0.73422	0.119567	34.6254	34.5684	34.6209	34.358	34.3993	34.5259	34.6037	34.7221	34.6242	33.4469	33.4703	33.4875	33.5975	33.4656	33.5352
3052	5	5	58	16.628	0	49.017	18661000000	142	Q86SX6	Q86SX6	Glutaredoxin-related protein 5, mitochondrial	GLRX5	Known	+	-0.176881	2.51755		0.374184	-0.335269	0.103907	1.76524		0.553125	0.197366	0.0589739	0.407991		0.76891	0.105057	30.0946	30.0594	30.0115	29.8536	29.8814	29.8999	30.1804	30.1436	30.1533	28.801	28.9678	28.7852	28.8821	28.9458	28.9029
2590	7	7	60.7	23.408	0	95.514	3527400000	64	Q16611;Q16611-2	Q16611;Q16611-2	Bcl-2 homologous antagonist/killer	BAK1	Known	+	-0.176662	0.952139		0.428385	-0.301042	-0.0242481	0.151054		0.909036	-0.0433097	0.26644	0.119507		0.569268	0.202988	27.6045	27.4585	27.5862	27.2587	27.3497	27.5108	27.4487	27.5647	27.5631	27.7365	26.3599	26.315	25.76	27.9264	27.5243
4005	14	12	42.2	59.241	0	58.951	2530700000	54	Q9BTT6;Q9BTT6-2	Q9BTT6;Q9BTT6-2	Leucine-rich repeat-containing protein 1	LRRC1			-0.176488	0.635611		0.463659	-0.282295	-0.26938	1.72196		0.139414	-0.471987	NaN	NaN		NaN	NaN	27.5203	27.4148	27.4008	27.0881	27.2241	27.4943	27.0878	27.2901	27.15	NaN	NaN	NaN	NaN	NaN	NaN
1200	9	9	71.2	14.515	0	113.13	17835000000	246	P25398	P25398	40S ribosomal protein S12	RPS12			-0.176448	1.80387		0.394811	-0.324495	-0.412968	3.49777	+	0.0396522	-0.770943	0.56616	1.53609		0.0559773	0.845003	29.9268	29.8616	29.8327	29.6297	29.733	29.729	29.4168	29.4897	29.4757	30.0304	30.0791	29.9013	30.2479	30.7548	30.7065
2020	5	5	68.9	11.466	0	60.454	11266000000	190	P82909	P82909	28S ribosomal protein S36, mitochondrial	MRPS36	Known	+	-0.176318	1.01661		0.426233	-0.303262	-0.292925	2.41822		0.103189	-0.533953	-0.25817	1.42019		0.237825	-0.441598	29.2236	29.3624	29.2368	29.2162	29.0981	28.9795	29.0122	28.9436	28.9883	29.3022	29.275	29.1266	28.8501	29.0638	29.0153
100	16	16	31.8	75.042	0	67.99	1360900000	88	O00139-2;O00139-1;O00139-5;O00139;O00139-4;Q8N4N8	O00139-2;O00139-1;O00139-5;O00139;O00139-4	Kinesin-like protein KIF2A	KIF2A			-0.17613	0.606158		0.469369	-0.279466	-0.110972	0.632014		0.573605	-0.193146	-0.332404	0.88371		0.188614	-0.492279	24.9652	24.9596	24.7902	24.6201	24.6041	24.9625	24.8046	NaN	24.7834	28.3223	28.2214	27.9999	28.0668	27.5687	27.911
5006	8	7	29	40.796	0	17.471	1148400000	26	Q9Y371;Q9Y371-2;Q9Y371-3	Q9Y371;Q9Y371-2	Endophilin-B1	SH3GLB1	Known		-0.176004	0.487357		0.490821	-0.267808	-0.0284042	0.0802618		0.904134	-0.0454534	0.583163	3.00381	+	0.0494857	1.07005	25.8487	25.5834	25.7876	25.2944	25.6792	25.718	25.565	25.6779	25.8915	26.2905	26.1851	26.2874	NaN	26.8308	26.8442
3419	30	30	40.7	118.71	0	181.3	2627900000	158	Q8TEX9;Q8TEX9-2	Q8TEX9;Q8TEX9-2	Importin-4	IPO4			-0.175977	0.336785		0.528399	-0.245863	-0.003884	0.00739103		0.983711	-0.00577452	0.491109	1.23475		0.0768128	0.715067	26.9704	26.8086	26.8748	26.3649	27.0913	26.6697	26.6298	27.1947	26.8176	28.0064	27.7419	27.8796	28.1223	28.695	28.2839
4425	13	13	44.6	32.177	0	116.08	8291300000	212	Q9NPL8	Q9NPL8	Complex I assembly factor TIMMDC1, mitochondrial	TIMMDC1	Known	+	-0.175288	0.596164		0.471749	-0.27757	0.235238	1.03948		0.219297	0.387994	0.133142	0.856044		0.516489	0.232648	28.0638	28.1881	28.4112	28.2125	27.9548	27.97	28.5165	28.44	28.4124	29.5296	29.733	29.7478	29.8156	29.7709	29.8233
2056	20	20	68.1	39.958	0	182.74	131640000000	688	Q00325-2;Q00325	Q00325-2;Q00325	Phosphate carrier protein, mitochondrial	SLC25A3	Known	+	-0.175157	1.49689		0.405212	-0.316077	-0.89296	5.53427	+	0.00850909	-1.70537	-0.032177	0.0997859		0.882995	-0.0522605	32.9112	32.8657	32.8525	32.5991	32.7494	32.7555	31.9829	32.0108	31.9569	33.1993	33.0478	32.9171	32.9947	32.8963	33.1766
2833	4	4	62	8.0224	0.00025988	7.6341	1590900000	48	Q69YU5	Q69YU5	Uncharacterized protein C12orf73	C12orf73			-0.174882	0.41673		0.513767	-0.260413	0.217966	0.61484		0.299371	0.330662	0.36208	0.648796		0.198647	0.481334	25.8858	26.344	26.1347	25.9281	NaN	25.9651	26.1788	26.3563	26.4833	26.7134	26.9508	26.4071	27.1284	26.6796	27.3497
4023	6	6	38.2	24.701	0	48.424	1331700000	68	Q9BUL8	Q9BUL8	Programmed cell death protein 10	PDCD10			-0.174532	0.40617		0.512171	-0.255815	-0.390681	1.26882		0.0760393	-0.606213	0.161829	0.357518		0.512531	0.235045	25.8855	25.7255	26.1936	25.6175	25.6652	25.9983	25.629	25.5264	25.4773	26.944	26.9677	27.171	26.854	27.4387	27.2755
1151	9	9	60.4	24.636	0	133.52	10691000000	165	P22061;P22061-2	P22061;P22061-2	Protein-L-isoaspartate(D-aspartate) O-methyltransferase	PCMT1	Predicted		-0.174433	1.34352		0.41374	-0.311088	0.0217044	0.19828		0.911941	0.0400366	0.250153	0.911182		0.285469	0.398231	29.164	29.1172	29.2148	28.8964	28.9936	29.0827	29.1262	29.2044	29.2305	28.7656	28.8552	28.7464	28.8161	29.2433	29.0583
4109	5	5	29.3	21.405	0	210.01	3100300000	85	Q9BYC8	Q9BYC8	39S ribosomal protein L32, mitochondrial	MRPL32	Known	+	-0.173693	0.221406		0.576722	-0.215505	-0.565473	1.09937	+	0.0416322	-0.762241	-0.0837809	0.627199		0.67272	-0.149575	27.4881	27.7666	26.9679	27.5967	27.1857	26.919	26.7388	26.8377	26.9496	27.8056	27.7592	27.7117	27.5905	27.6602	27.7746
3059	3	3	41.8	13.592	0	147.06	3586000000	91	Q86TS9-3;Q86TS9;Q86TS9-2	Q86TS9-3;Q86TS9	39S ribosomal protein L52, mitochondrial	MRPL52	Known	+	-0.17366	1.21147		0.421287	-0.306085	-0.273238	2.87869		0.116467	-0.511544	0.2066	0.872228		0.358637	0.338552	27.6477	27.6633	27.5667	27.338	27.5432	27.4756	27.3664	27.3717	27.32	27.146	27.315	27.409	27.3662	27.6389	27.4848
1493	3	3	14.6	22.763	0	8.7641	601980000	33	P45877	P45877	Peptidyl-prolyl cis-trans isomerase C	PPIC			-0.173509	0.604924		0.47414	-0.276056	0.461433	2.23998	+	0.0362514	0.787817	NaN	NaN		NaN	NaN	25.2167	24.9832	25.0478	24.7805	24.823	25.1237	25.5938	25.444	25.5941	NaN	NaN	NaN	NaN	NaN	NaN
320	38	10	50.8	112.59	0	323.31	2508900000	62	O43491;O43491-3;O43491-2	O43491;O43491-3;O43491-2	Band 4.1-like protein 2	EPB41L2			-0.173269	0.264489		0.559526	-0.227522	-0.568877	1.2112	+	0.0366	-0.789329	NaN	NaN		NaN	NaN	27.6449	27.5192	27.3749	26.935	27.2888	27.7953	26.7135	27.3561	26.7628	NaN	NaN	NaN	NaN	NaN	NaN
2242	9	9	19.9	62.328	0	27.065	1446600000	43	Q13057;Q13057-2	Q13057;Q13057-2	Bifunctional coenzyme A synthase;Phosphopantetheine adenylyltransferase;Dephospho-CoA kinase	COASY	Known	+	-0.173196	0.359419		0.525584	-0.24713	-0.00955582	0.0265888		0.962463	-0.0153996	NaN	NaN		NaN	NaN	26.5017	26.3741	26.6427	25.9689	26.4554	26.5745	26.3122	26.5849	26.5927	NaN	NaN	NaN	NaN	26.2457	NaN
1472	27	27	78.3	41.924	0	323.31	77770000000	841	P42765	P42765	3-ketoacyl-CoA thiolase, mitochondrial	ACAA2	Known	+	-0.172986	2.05121		0.396419	-0.322541	0.400789	3.22868	+	0.0459934	0.741382	0.122761	1.30301		0.528205	0.225603	31.8597	31.8022	31.8685	31.7278	31.6559	31.6277	32.1883	32.3083	32.2361	32.0093	32.0879	32.1468	32.2193	32.1663	32.2266
5023	8	8	49.1	19.458	0	23.361	2616000000	66	Q9Y3C8	Q9Y3C8	Ubiquitin-fold modifier-conjugating enzyme 1	UFC1			-0.172076	1.63419		0.40912	-0.313951	-0.0485725	0.256854		0.817908	-0.0844442	0.250573	0.559145		0.3314	0.358592	27.0243	26.8863	26.9337	26.7248	26.7939	26.8092	26.808	27.0212	26.8693	27.4855	27.6127	27.61	27.5958	28.2069	27.6572
4592	5	5	8.9	69.305	0	8.2169	331390000	13	Q9NXH9-2;Q9NXH9	Q9NXH9-2;Q9NXH9	tRNA (guanine(26)-N(2))-dimethyltransferase	TRMT1		+	-0.17194	0.552383		0.484912	-0.269567	NaN	NaN		NaN	NaN	NaN	NaN		NaN	NaN	24.6308	24.6714	24.8722	24.629	24.3252	24.7043	NaN	NaN	NaN	NaN	NaN	NaN	NaN	NaN	NaN
135	32	32	60.6	81.876	0	313.28	5492700000	240	O00429;O00429-3;O00429-2;O00429-6;O00429-4;O00429-5;O00429-8;O00429-7	O00429;O00429-3;O00429-2;O00429-6;O00429-4;O00429-5;O00429-8;O00429-7	Dynamin-1-like protein	DNM1L	Known	+	-0.171869	0.374312		0.524865	-0.248193	-0.674574	1.61045	+	0.0248754	-0.975075	0.393166	1.18121		0.119502	0.598892	27.6322	27.7588	27.8203	27.2138	27.6445	27.8374	26.7394	27.3753	27.0728	29.2706	29.3403	29.4476	29.4524	29.9226	29.8628
533	15	15	38.7	54.812	0	91.213	10258000000	222	O75844	O75844	CAAX prenyl protease 1 homolog	ZMPSTE24			-0.171855	2.26495		0.397092	-0.32339	-0.071586	1.40072		0.69395	-0.136661	0.293533	0.590094		0.276023	0.406446	29.135	29.1193	29.0845	28.9513	28.8889	28.983	29.0376	29.0752	29.0112	28.9866	28.5829	28.7757	28.8924	29.4535	28.88
1516	13	13	68.6	22.876	0	177.31	15280000000	183	P46782	P46782	40S ribosomal protein S5;40S ribosomal protein S5, N-terminally processed	RPS5			-0.171702	0.48844		0.501066	-0.262916	-0.542455	2.22599	+	0.028	-0.901586	0.285608	0.908136		0.237695	0.441582	29.4792	29.2815	29.4538	28.9537	29.3849	29.3608	28.7908	29.023	28.7733	30.6791	30.6073	30.6672	30.7768	31.2265	30.8072
1762	7	7	40.7	35.54	0	93.286	1393300000	54	P55735;P55735-2;P55735-4;P55735-3	P55735;P55735-2;P55735-4;P55735-3	Protein SEC13 homolog	SEC13			-0.171042	0.683913		0.470954	-0.27869	0.045365	0.367583		0.823727	0.0822425	NaN	NaN		NaN	NaN	26.0282	25.9563	25.9022	25.5853	25.8394	25.949	25.9414	26.0141	26.0673	NaN	NaN	NaN	NaN	NaN	NaN
824	63	62	55.4	170.59	0	323.31	14553000000	470	P07814	P07814	Bifunctional glutamate/proline--tRNA ligase;Glutamate--tRNA ligase;Proline--tRNA ligase	EPRS	Predicted		-0.170841	0.473437		0.507732	-0.260254	-0.355363	2.21855		0.068831	-0.626828	0.569716	1.86739		0.0526345	0.896796	29.2863	29.1771	29.1794	28.7392	29.1852	29.2059	28.8257	28.9688	28.7822	30.6272	30.5593	30.66	30.9395	31.3916	31.2246
3822	27	27	44.3	91.706	0	188.13	5060200000	174	Q96QK1	Q96QK1	Vacuolar protein sorting-associated protein 35	VPS35			-0.170785	0.600012		0.480687	-0.272205	-0.126525	0.522212		0.5276	-0.208622	0.423094	2.0361		0.0765817	0.717443	27.6847	27.5961	27.6644	27.2471	27.5109	27.6748	27.4779	27.7182	27.3695	29.1909	29.0583	29.1598	29.4168	29.6946	29.5669
310	11	11	59.2	22.237	0	174.15	3890500000	98	O43399;O43399-5;O43399-7;O43399-2;O43399-4;O43399-3;O43399-6	O43399;O43399-5;O43399-7;O43399-2;O43399-4;O43399-3;O43399-6	Tumor protein D54	TPD52L2			-0.170732	0.433509		0.512991	-0.255351	0.0321585	0.173401		0.88279	0.0563953	0.446112	1.51407		0.0798658	0.701242	27.5634	27.6617	27.4992	27.1499	27.7048	27.3573	27.5059	27.636	27.6788	27.993	28.07	28.0516	28.2268	28.6784	28.5477
1095	4	4	15.8	32.461	0	29.851	627200000	32	P18827	P18827	Syndecan-1	SDC1			-0.170438	0.105157		0.700548	-0.157216	-0.502023	0.740863		0.0728571	-0.619134	1.05238	1.20145	+	0.0440755	1.21827	24.7029	24.9358	24.6523	23.5714	24.6376	25.5706	23.739	24.7723	24.2736	25.4712	25.4909	NaN	26.465	27.0521	26.0832
1283	8	8	63.6	17.818	0	125.7	24939000000	265	P30050;P30050-2	P30050;P30050-2	60S ribosomal protein L12	RPL12			-0.170428	0.615469		0.479199	-0.272968	-0.37207	1.8293		0.0682454	-0.629902	0.404011	1.78875		0.0883987	0.671945	30.3108	30.249	30.2272	29.8737	30.1072	30.2948	29.7799	30.0623	29.8286	30.9234	30.7976	30.9152	31.114	31.4338	31.3004
1391	10	10	71.4	20.455	0	89.167	1749500000	89	P36405	P36405	ADP-ribosylation factor-like protein 3	ARL3			-0.169875	0.27153		0.561188	-0.226299	-0.713695	1.61673	+	0.0232432	-1.01663	0.44573	1.47307		0.0810984	0.696106	25.8507	26.11	25.8989	25.3976	26.2168	25.7357	24.9592	25.1688	25.5906	27.6145	27.8449	28.0273	28.1288	28.3659	28.3292
1957	46	26	60.5	104.55	0	323.31	15733000000	482	P63010;P63010-2;P63010-3	P63010;P63010-2;P63010-3	AP-2 complex subunit beta	AP2B1	Predicted		-0.169324	0.82643		0.459229	-0.284598	-0.269487	2.21731		0.126604	-0.489273	0.360776	1.96004		0.106153	0.621518	29.6394	29.5803	29.5922	29.2965	29.3952	29.6122	29.3285	29.4195	29.2554	30.0321	30.0533	30.0626	30.2584	30.5298	30.4421
1812	3	3	25	25.809	0	239.02	12274000000	137	P60033	P60033	CD81 antigen	CD81			-0.168362	0.474811		0.511687	-0.257519	-0.297789	1.60925		0.117242	-0.509258	0.0619392	0.394222		0.75826	0.109364	29.5839	29.4205	29.46	29.0438	29.3767	29.5388	29.0913	29.323	29.1567	29.1403	28.9736	28.9848	29.0382	29.0772	29.1692
3026	14	14	41	58.572	0	64.325	3674000000	113	Q7Z4H8;Q7Z4H8-2;Q7Z4H8-3	Q7Z4H8;Q7Z4H8-2;Q7Z4H8-3	KDEL motif-containing protein 2	KDELC2			-0.167339	0.641886		0.481927	-0.270916	0.596654	2.21877	+	0.0251879	0.974374	-0.23208	0.523959		0.362743	-0.334049	27.5694	27.3641	27.2622	27.0808	27.3159	27.2971	27.8618	28.058	28.0659	27.3574	27.1219	26.9635	26.8036	27.2267	26.7163
1539	24	24	39.3	83.308	0	67.634	4679200000	150	P48449;P48449-3;P48449-2	P48449;P48449-3;P48449-2	Lanosterol synthase	LSS	Predicted		-0.166586	0.659742		0.481997	-0.271156	-0.541689	1.88478	+	0.0289272	-0.863782	0.213077	0.30289		0.459203	0.271038	28.2625	27.996	27.9822	27.8282	27.8626	28.0502	27.404	27.5062	27.7055	28.19	27.8545	27.3645	27.7147	28.2385	28.095
2209	24	24	59.4	53.126	0	323.31	45462000000	638	Q12849;Q12849-5	Q12849;Q12849-5	G-rich sequence factor 1	GRSF1	Known	+	-0.165298	0.989468		0.456556	-0.28582	0.15763	1.60865		0.37143	0.289292	0.0312316	0.348905		0.869836	0.0581434	31.2025	31.0907	31.1809	30.9254	30.9192	31.1336	31.2648	31.317	31.3652	31.2321	31.2366	31.22	31.1959	31.263	31.3234
768	20	19	35.5	82.915	0	87.311	4333200000	123	P05067-7;P05067-11;P05067-8;P05067-9;P05067;P05067-10;P05067-3;P05067-4;P05067-5;P05067-6;P05067-2	P05067-7;P05067-11;P05067-8;P05067-9;P05067;P05067-10;P05067-3;P05067-4;P05067-5;P05067-6	Amyloid beta A4 protein;N-APP;Soluble APP-alpha;Soluble APP-beta;C99;Beta-amyloid protein 42;Beta-amyloid protein 40;C83;P3(42);P3(40);C80;Gamma-secretase C-terminal fragment 59;Gamma-secretase C-terminal fragment 57;Gamma-secretase C-terminal fragment 50;C31	APP			-0.164809	1.71784		0.426494	-0.303291	-1.45685	4.87495	+	0.012	-2.61839	-0.961077	2.37976	+	0.0384533	-1.44883	28.123	28.0409	28.1756	27.9844	27.9221	27.9387	26.6743	26.7159	26.5789	28.2673	28.1582	28.2293	27.3941	27.4396	26.9379
4357	16	16	67.1	26.21	0	186.77	10198000000	221	Q9HB71;Q9HB71-3;Q9HB71-2	Q9HB71;Q9HB71-3	Calcyclin-binding protein	CACYBP			-0.164261	0.521559		0.511335	-0.257306	-0.267017	1.33945		0.160448	-0.450094	0.501671	1.58565		0.0640548	0.777484	27.7229	27.59	27.7027	27.2546	27.5683	27.6999	27.2747	27.5608	27.379	30.6369	30.7278	30.799	30.9565	31.4149	31.2973
305	6	6	50	19.81	0	42.027	1209400000	38	O43324;O43324-2	O43324;O43324-2	Eukaryotic translation elongation factor 1 epsilon-1	EEF1E1			-0.163786	0.430977		0.526174	-0.247198	-0.392735	1.61292		0.0654381	-0.642274	NaN	NaN		NaN	NaN	26.2698	26.0403	26.1243	25.6892	26.0827	26.1711	25.6856	25.9284	25.6421	NaN	NaN	NaN	NaN	NaN	NaN
697	34	34	68.8	61.397	0	323.31	115940000000	1063	P00367;P00367-3;P00367-2;P49448	P00367;P00367-3;P00367-2;P49448	Glutamate dehydrogenase 1, mitochondrial;Glutamate dehydrogenase 2, mitochondrial	GLUD1;GLUD2	Known	+	-0.163701	2.2382		0.416253	-0.308613	-0.116116	1.84998		0.499165	-0.219957	-0.102793	1.29442		0.589611	-0.191342	32.5755	32.6426	32.6083	32.4842	32.4482	32.403	32.483	32.5313	32.4638	32.4568	32.416	32.43	32.3993	32.3141	32.281
941	6	6	14.1	44.882	0	51.889	12970000000	138	P11279;P11279-2	P11279;P11279-2	Lysosome-associated membrane glycoprotein 1	LAMP1			-0.163621	1.18069		0.448988	-0.289516	-0.303359	2.27157		0.0967817	-0.546375	-0.0471636	0.718289		0.802268	-0.0889841	29.1512	29.2926	29.325	29.1657	29.0697	29.0425	28.9519	28.9289	28.9779	30.0505	30.0506	30.1365	30.0142	30.0413	30.0406
783	14	12	42.3	48.057	0	49.645	2315500000	64	P05783;CON__P05784;CON__H-INV:HIT000015463	P05783	Keratin, type I cytoskeletal 18	KRT18			-0.163543	0.369375		0.540865	-0.238662	-0.502759	2.45466	+	0.0290554	-0.864552	NaN	NaN		NaN	NaN	27.3467	27.4048	27.368	26.8507	27.3152	27.463	26.8368	27.0223	26.7523	NaN	NaN	NaN	NaN	NaN	NaN
3885	24	24	27.6	105.34	0	258.3	5800600000	191	Q99613;Q99613-2;B5ME19	Q99613;Q99613-2;B5ME19	Eukaryotic translation initiation factor 3 subunit C;Eukaryotic translation initiation factor 3 subunit C-like protein	EIF3C;EIF3CL			-0.163497	0.424831		0.528278	-0.246122	-0.629182	2.22238	+	0.0234014	-1.01777	0.418597	1.52126		0.0895166	0.667521	27.8736	28.047	27.9126	27.489	28.0207	27.833	27.1934	27.5262	27.2261	29.2386	29.2235	29.1554	29.4498	29.8654	29.558
2091	54	44	63.5	115.93	0	323.31	34059000000	718	Q02218;Q02218-2;Q02218-3	Q02218;Q02218-2	2-oxoglutarate dehydrogenase, mitochondrial	OGDH	Known	+	-0.162725	2.01409		0.425274	-0.30415	0.255896	2.95252		0.130991	0.482294	-0.128454	1.45658		0.510352	-0.23746	30.702	30.7056	30.7952	30.5709	30.542	30.6017	30.9851	30.9935	30.9919	30.6802	30.8048	30.7705	30.6421	30.639	30.589
183	5	5	19.6	37.978	0	8.6894	458750000	20	O14657	O14657	Torsin-1B	TOR1B			-0.162132	0.387055		0.552268	-0.246795	-0.0436344	0.0785111		0.870608	-0.0630778	0.640283	1.13858		0.0558326	0.870443	NaN	24.7429	24.8391	NaN	24.4795	24.7783	24.8324	24.4631	24.9466	NaN	24.1194	23.9293	24.3684	24.971	24.6544
1850	17	17	56.3	44.76	0	168.18	6501200000	146	P61160;P61160-2	P61160;P61160-2	Actin-related protein 2	ACTR2			-0.161884	0.272607		0.569222	-0.219337	-0.898637	1.22254	+	0.0249844	-1.06306	0.531159	1.69079		0.0592865	0.826602	27.0766	26.8544	27.0012	26.4473	26.764	27.2353	26.5155	26.3097	25.411	30.1039	30.0847	30.1665	30.438	30.9153	30.5953
3057	2	2	3.9	61.731	0.00024248	5.7915	422370000	11	Q86TM6-2;Q86TM6-3;Q86TM6	Q86TM6-2;Q86TM6-3;Q86TM6	E3 ubiquitin-protein ligase synoviolin	SYVN1			-0.161761	0.785037		0.481655	-0.271838	0.0477797	0.416633		0.811634	0.087059	NaN	NaN		NaN	NaN	24.7871	24.7718	24.7645	24.5783	24.4683	24.7914	24.7601	24.9175	24.7891	NaN	NaN	NaN	NaN	NaN	NaN
1375	8	8	19.6	64.734	0	59.928	1374900000	49	P35610;P35610-3;P35610-2	P35610;P35610-3;P35610-2	Sterol O-acyltransferase 1	SOAT1			-0.161472	0.785324		0.481706	-0.271445	0.118976	0.672261		0.535837	0.205015	NaN	NaN		NaN	NaN	26.1688	25.9694	26.158	25.9398	25.8159	26.056	26.2276	26.1308	26.2946	NaN	NaN	NaN	NaN	NaN	NaN
1084	7	7	50.9	12.538	0	11.941	12214000000	86	P18077	P18077	60S ribosomal protein L35a	RPL35A	Predicted	+	-0.161455	1.06708		0.468015	-0.286315	-0.478018	3.82986	+	0.0282956	-0.89522	0.735385	4.53617	+	0.0351619	1.37549	28.9421	28.9636	29.0146	28.7347	NaN	28.8892	28.467	28.548	28.4712	30.4594	30.4355	30.4206	31.1378	31.2392	31.1446
5131	4	4	33.8	15.512	0	122.22	18816000000	172	Q9Y6H1;Q5T1J5	Q9Y6H1;Q5T1J5	Coiled-coil-helix-coiled-coil-helix domain-containing protein 2;Putative coiled-coil-helix-coiled-coil-helix domain-containing protein CHCHD2P9, mitochondrial	CHCHD2;CHCHD2P9	Known	+	-0.160976	1.85682		0.432495	-0.298935	0.624101	3.14807	+	0.0263857	1.10201	-0.00394058	0.0508985		0.972155	-0.00748303	29.4764	29.5652	29.4414	29.3383	29.312	29.3497	30.0247	30.2157	30.1149	30.6717	30.7158	30.7447	30.7301	30.6761	30.7142
1688	18	18	21.9	119.16	0	79.289	1254900000	47	P52732	P52732	Kinesin-like protein KIF11	KIF11			-0.160903	0.671642		0.498177	-0.264329	-0.772062	3.12769	+	0.0120313	-1.32416	0.390561	1.54592		0.101336	0.633586	26.0373	26.0212	25.9564	25.6677	25.8307	26.0338	25.0854	25.3572	25.2562	26.3316	26.3014	26.4946	26.5724	26.9038	26.823
1199	14	14	64	35.249	0	107.74	13713000000	203	P25325-2;P25325	P25325-2;P25325	3-mercaptopyruvate sulfurtransferase	MPST	Known	+	-0.160378	2.21115		0.426994	-0.302403	0.0534013	0.767301		0.782018	0.100371	-0.135992	0.576788		0.530631	-0.224778	29.2535	29.3245	29.2803	29.1419	29.1534	29.0819	29.2948	29.379	29.3447	29.8967	29.9477	29.8992	29.5712	29.8857	29.8787
1684	10	10	23.9	54.181	0	44.704	705540000	51	P52594-2;P52594-3;P52594;P52594-4	P52594-2;P52594-3;P52594;P52594-4	Arf-GAP domain and FG repeat-containing protein 1	AGFG1			-0.160006	0.437008		0.538661	-0.245989	-0.396091	1.18404		0.076577	-0.602631	NaN	NaN		NaN	NaN	24.6094	24.4932	24.8082	NaN	24.3529	24.601	24.4956	24.1268	24.1002	NaN	NaN	NaN	NaN	NaN	NaN
258	5	5	32.7	22.958	0	26.424	3530000000	53	O15258	O15258	Protein RER1	RER1			-0.159787	0.37541		0.545939	-0.235501	0.130919	0.28878		0.56766	0.19163	NaN	NaN		NaN	NaN	26.8876	27.4604	27.0586	26.9345	26.9079	27.0849	27.1588	27.2461	27.3945	NaN	28.7812	NaN	28.0883	28.4242	28.4627
2377	53	53	42.3	166.57	0	192.81	9028400000	300	Q14152;Q14152-2	Q14152;Q14152-2	Eukaryotic translation initiation factor 3 subunit A	EIF3A			-0.159688	0.286289		0.568173	-0.220224	-0.590825	1.58801	+	0.0290118	-0.88082	0.329439	1.07594		0.172996	0.511607	28.6788	28.6599	28.6474	28.0525	28.7229	28.7317	27.9453	28.4087	27.8597	30.0657	29.9561	29.9111	30.0381	30.4809	30.4024
4684	19	19	25.6	98.555	0	45.051	4121900000	106	Q9P2B2	Q9P2B2	Prostaglandin F2 receptor negative regulator	PTGFRN			-0.159684	0.633842		0.508098	-0.260264	-0.0831229	0.547227		0.669954	-0.146555	0.708086	2.63332	+	0.0450707	1.17471	27.5935	27.6542	27.7508	27.3403	27.4815	27.6977	27.6203	27.6433	27.4856	27.6511	27.8478	27.6432	28.3115	28.3821	28.5727
115	19	19	51.9	47.463	0	60.328	4024100000	122	O00231;O00231-2	O00231;O00231-2	26S proteasome non-ATPase regulatory subunit 11	PSMD11			-0.159651	0.367029		0.548644	-0.234151	-0.331469	1.24336		0.10517	-0.530201	0.471841	1.48203		0.0736429	0.728671	27.2063	27.0972	27.177	26.6442	27.2066	27.1507	26.6369	27.052	26.7972	29.2884	29.0079	28.8373	29.3844	29.5629	29.6018
1849	22	18	63.4	47.371	0	204.35	10335000000	245	P61158;Q9P1U1-2;Q9C0K3	P61158	Actin-related protein 3	ACTR3			-0.158663	0.379346		0.547013	-0.234823	-0.133608	0.500006		0.505743	-0.216638	0.501012	1.67111		0.0644333	0.787278	28.5059	28.3309	28.418	27.9476	28.3066	28.5247	28.2123	28.492	28.1496	30.3065	30.3997	30.3782	30.601	31.0394	30.9471
3095	13	13	41.2	31.106	0	57.668	7037200000	162	Q86WA6-2;Q86WA6	Q86WA6-2;Q86WA6	Valacyclovir hydrolase	BPHL	Predicted	+	-0.15845	0.508625		0.522894	-0.248974	0.371827	1.55143		0.0753797	0.609159	0.0756257	0.284198		0.724411	0.12453	27.9325	27.9436	27.7822	27.4844	27.7918	27.9069	28.4043	28.296	28.0735	29.6445	29.4839	29.3442	29.5278	29.4818	29.6899
3870	7	7	66.9	17.328	0	69.998	1659100000	51	Q99471;Q99471-3;Q99471-2	Q99471;Q99471-3	Prefoldin subunit 5	PFDN5			-0.157605	0.304736		0.566619	-0.221807	-0.170855	0.276012		0.480687	-0.228241	0.496932	1.85811		0.0627334	0.803128	26.7232	26.2684	26.2396	25.9852	26.4619	26.3114	25.9805	26.6169	26.1213	27.1622	27.1099	27.1411	27.4344	27.8422	27.6274
647	7	7	46.5	14.279	0	21.375	7896800000	111	O95563	O95563	Mitochondrial pyruvate carrier 2	MPC2	Known	+	-0.157396	1.1288		0.471655	-0.278294	0.0207068	0.102185		0.919553	0.0361468	0.324432	0.952822		0.188877	0.492038	28.7903	28.8859	28.953	28.7197	28.6398	28.7975	28.9414	28.7868	28.963	27.6461	27.5716	28.0036	27.8928	28.1252	28.1766
158	10	10	70.6	20.658	0	59.811	5633700000	114	O00746;O00746-2	O00746;O00746-2	Nucleoside diphosphate kinase, mitochondrial	NME4	Known	+	-0.15727	0.406461		0.543196	-0.236806	0.78351	2.23893	+	0.0198436	1.21355	0.0376816	0.259955		0.84823	0.0675615	27.2404	27.3662	27.6672	27.4305	27.2987	27.0728	28.324	28.0763	28.2241	29.3877	29.4017	29.2272	29.4012	29.3761	29.3524
2208	10	10	50.8	34.18	0	83.171	2537700000	85	Q12846;Q12846-2	Q12846;Q12846-2	Syntaxin-4	STX4			-0.157251	0.667661		0.509704	-0.259142	-0.0961615	0.366169		0.649916	-0.157709	0.551976	1.58437		0.0571326	0.836374	27.0336	26.9773	26.9931	26.6569	26.8534	27.022	26.8827	27.1033	26.7296	26.9311	27.0427	27.2608	27.3926	27.8285	27.6693
2262	40	40	63	100.2	0	323.31	6023200000	251	Q13200;Q13200-3;Q13200-2	Q13200;Q13200-3;Q13200-2	26S proteasome non-ATPase regulatory subunit 2	PSMD2			-0.157129	0.333531		0.561558	-0.226327	-0.26515	0.419378		0.275952	-0.344617	0.399808	1.76365		0.0900963	0.664172	26.8519	26.4442	26.2915	26.305	26.5665	26.2446	25.8866	26.6169	26.2886	30.0577	30.2088	30.0797	30.4078	30.6949	30.4428
2981	29	29	68.2	47.346	0	323.31	49931000000	680	Q7L0Y3	Q7L0Y3	Mitochondrial ribonuclease P protein 1	TRMT10C	Known	+	-0.156179	2.74348		0.431423	-0.29966	-0.0806135	1.6114		0.657435	-0.154164	0.0685285	1.01726		0.714648	0.128905	31.2325	31.2934	31.2739	31.1289	31.1123	31.0901	31.1746	31.2142	31.1691	31.818	31.7218	31.7849	31.8583	31.8148	31.8572
3466	21	21	31.5	102.89	0	123.19	2286100000	136	Q8WWM7-6;Q8WWM7-8;Q8WWM7-5;Q8WWM7-4;Q8WWM7-9;Q8WWM7-2;Q8WWM7;Q8WWM7-3;Q8WWM7-7	Q8WWM7-6;Q8WWM7-8;Q8WWM7-5;Q8WWM7-4;Q8WWM7-9;Q8WWM7-2;Q8WWM7;Q8WWM7-3;Q8WWM7-7	Ataxin-2-like protein	ATXN2L			-0.156082	0.188921		0.633099	-0.191274	-0.301131	0.549017		0.200656	-0.405461	-0.528303	0.784704		0.094523	-0.65175	26.0954	26.6372	26.381	25.6721	26.5571	26.4161	26.0437	26.4038	25.7628	28.571	28.5073	28.317	27.4292	27.9101	28.4711
1272	15	15	56	31.554	0	314.78	32593000000	243	P29966	P29966	Myristoylated alanine-rich C-kinase substrate	MARCKS			-0.156006	0.128044		0.686372	-0.164745	-0.617132	2.25059	+	0.0234935	-1.00534	0.611136	1.7413	+	0.0500117	0.928337	28.6389	28.9881	28.6714	27.7515	28.9441	29.1348	28.1254	28.1962	28.1254	32.363	32.5803	32.5656	32.848	33.3327	33.1617
3935	11	11	38.5	35.505	0	102.48	18772000000	242	Q9BQ69	Q9BQ69	O-acetyl-ADP-ribose deacetylase MACROD1	MACROD1	Known	+	-0.155083	1.82215		0.451254	-0.288267	-0.0744712	0.633879		0.700212	-0.134679	-0.0154686	0.0805258		0.935112	-0.0272423	29.7993	29.6915	29.7619	29.6087	29.6241	29.5547	29.7537	29.6685	29.6072	30.7359	30.6276	30.5182	30.6596	30.5727	30.603
3637	6	4	28.8	26.697	0	26.764	529290000	35	Q96C19;Q9BUP0-2	Q96C19	EF-hand domain-containing protein D2	EFHD2			-0.154757	0.214952		0.616636	-0.198467	-0.175197	0.561037		0.397046	-0.274359	NaN	NaN		NaN	NaN	24.6739	24.5932	24.8606	24.0493	24.9639	24.6503	24.5669	24.7125	24.3227	NaN	NaN	NaN	NaN	NaN	NaN
4295	8	8	17.8	74.777	0	23.921	836570000	23	Q9H6R3;Q9H6R3-2	Q9H6R3;Q9H6R3-2	Acyl-CoA synthetase short-chain family member 3, mitochondrial	ACSS3	Known	+	-0.154453	0.546556		0.52595	-0.24714	0.225365	2.34162		0.186664	0.417933	NaN	NaN		NaN	NaN	25.6759	25.6739	25.6841	25.3906	25.4068	25.7732	25.8253	25.9377	25.947	NaN	NaN	NaN	NaN	NaN	NaN
717	10	2	66.7	21.298	0	16.651	621100000	23	P01112;P01112-2	P01112;P01112-2	GTPase HRas;GTPase HRas, N-terminally processed	HRAS			-0.154175	0.652512		0.514524	-0.25405	-0.305242	1.56773		0.112887	-0.517759	0.215963	0.325555		0.445136	0.27953	24.5095	24.5929	24.6243	24.2367	24.4419	24.5856	24.4097	24.278	24.1234	26.0788	26.1122	26.2333	25.9422	26.86	26.2701
358	21	21	44.3	62.942	0	183.57	5739300000	204	O43776;O43776-2	O43776	Asparagine--tRNA ligase, cytoplasmic	NARS			-0.154076	0.243306		0.600402	-0.205428	-0.507711	1.04036		0.0543448	-0.696236	0.617387	2.02289	+	0.0508365	0.976761	27.6125	27.2232	27.4145	26.8265	27.3972	27.5643	26.7434	27.3067	26.6769	29.5392	29.5962	29.6829	29.9945	30.4262	30.2498
3334	25	25	39.9	95.925	0	265.72	5252400000	171	Q8NE71;Q8NE71-2	Q8NE71;Q8NE71-2	ATP-binding cassette sub-family F member 1	ABCF1			-0.154065	0.707079		0.510745	-0.257007	-0.207946	0.514997		0.341289	-0.307106	0.496077	1.12324		0.0799928	0.700972	27.4496	27.4947	27.2641	27.142	27.3808	27.2234	26.873	27.3175	27.3941	29.4957	29.5608	29.51	29.6051	30.2405	30.209
569	34	34	71.2	67.454	0	323.31	74084000000	872	O94826	O94826	Mitochondrial import receptor subunit TOM70	TOMM70A	Known	+	-0.153979	2.07872		0.449166	-0.28957	0.0293547	0.291834		0.885581	0.0542898	0.110153	1.63518		0.562798	0.207536	31.7755	31.8084	31.8754	31.6749	31.6419	31.6806	31.8028	31.9001	31.8444	32.1761	32.1861	32.1708	32.2802	32.3439	32.2393
2228	6	6	6.2	127.06	0	14.826	511610000	21	Q12965;O00160	Q12965	Unconventional myosin-Ie	MYO1E			-0.153924	0.687154		0.51206	-0.25572	-0.256699	1.44119		0.166984	-0.440461	NaN	NaN		NaN	NaN	24.9719	24.9088	24.7597	24.7123	24.5948	24.8716	24.5893	24.729	24.5521	NaN	NaN	NaN	NaN	NaN	NaN
2015	17	17	50.8	41.28	0	198.32	35083000000	374	P82650;P82650-2	P82650;P82650-2	28S ribosomal protein S22, mitochondrial	MRPS22	Known	+	-0.153702	1.21186		0.475246	-0.274665	-0.391593	3.41296	+	0.0486742	-0.731187	0.108809	1.07536		0.57589	0.198714	31.1012	31.0834	31.1307	30.8908	30.896	31.0673	30.7668	30.6538	30.72	30.0888	30.0138	30.1155	30.2543	30.1512	30.139
1456	13	13	57	32.816	0	142.74	39580000000	308	P42126;P42126-2	P42126;P42126-2	Enoyl-CoA delta isomerase 1, mitochondrial	ECI1	Known	+	-0.153638	1.37637		0.47095	-0.278275	-0.351042	2.3769		0.0686831	-0.627116	-0.323683	0.978726		0.1869	-0.494179	31.2287	31.3135	31.2944	31.0371	31.1878	31.1507	31.0274	30.842	30.9141	29.4757	29.8209	29.7432	29.571	29.1804	29.3173
1928	7	7	24.5	28.68	0	30.944	8701000000	115	P62753	P62753	40S ribosomal protein S6	RPS6			-0.153519	0.436648		0.545717	-0.235936	-0.460718	1.74272	+	0.0454832	-0.744018	0.979207	2.3364	+	0.0404638	1.45921	28.5677	28.4639	28.5109	28.0893	28.3955	28.5972	27.8383	28.2333	28.0888	29.4945	29.4547	29.6507	30.2701	30.8153	30.4521
3144	6	6	12.7	72.078	0	19.302	1044100000	25	Q8IW92	Q8IW92	Beta-galactosidase-1-like protein 2	GLB1L2			-0.153461	0.618316		0.520281	-0.25095	-0.242622	1.44173		0.185923	-0.419599	NaN	NaN		NaN	NaN	26.3047	26.1009	26.0776	25.9603	25.8898	26.1727	25.8648	25.9695	25.921	NaN	NaN	NaN	NaN	NaN	NaN
104	45	45	53.9	117.91	0	323.31	20379000000	536	O00159-2;O00159-3;O00159	O00159-2;O00159-3;O00159	Unconventional myosin-Ic	MYO1C			-0.153356	0.510921		0.535201	-0.242838	0.189491	0.979253		0.315641	0.320796	0.313822	1.56766		0.160092	0.530046	29.9727	29.8724	29.8395	29.5051	29.7879	29.9316	30.0795	30.2277	29.9459	30.3326	30.399	30.3782	30.5161	30.8241	30.711
1473	4	4	26	14.551	0	8.3151	4734200000	39	P42766	P42766	60S ribosomal protein L35	RPL35			-0.152682	0.474891		0.541062	-0.238773	-0.800744	2.21748	+	0.0180465	-1.23021	-0.424419	0.406868		0.229986	-0.450284	27.6009	27.2892	27.2712	27.0572	27.3437	27.3023	26.3764	26.6612	26.7214	29.5621	30.1379	29.4763	28.7665	29.0744	30.0621
2372	14	14	18.9	97.44	0	37.936	3748000000	81	Q14118	Q14118	Dystroglycan;Alpha-dystroglycan;Beta-dystroglycan	DAG1			-0.151782	0.346141		0.564983	-0.22263	-0.620498	3.84766	+	0.0246733	-1.14139	0.412619	0.770299		0.143397	0.552603	27.8297	27.8238	27.7189	27.2943	27.7332	27.8895	27.1798	27.1236	27.2075	27.2439	27.086	27.1035	27.1133	27.6135	27.9444
716	10	2	66.7	21.229	0	133.26	818020000	27	P01111	P01111	GTPase NRas	NRAS			-0.151534	0.374186		0.564149	-0.228372	-0.247773	0.99136		0.205938	-0.401449	NaN	NaN		NaN	NaN	25.2578	25.0666	25.2322	24.8407	25.2273	NaN	25.0427	25.0342	24.7364	26.5857	26.3198	26.3004	26.5615	NaN	NaN
3642	7	7	23.7	38.552	0	20.428	487760000	35	Q96CM3-2;Q96CM3	Q96CM3-2;Q96CM3	RNA pseudouridylate synthase domain-containing protein 4	RPUSD4	Known	+	-0.151156	0.705629		0.516559	-0.252871	-0.532885	3.12434	+	0.0248319	-0.955944	NaN	NaN		NaN	NaN	24.3235	24.4138	24.4096	24.218	24.0766	24.3988	23.7695	23.9395	23.8392	NaN	NaN	NaN	NaN	NaN	NaN
2105	55	41	10.1	860.65	0	154	2117500000	110	Q03001;Q03001-14;Q03001-8;Q03001-9;Q03001-13;Q03001-10	Q03001;Q03001-14;Q03001-8	Dystonin	DST			-0.150769	0.425949		0.552457	-0.231538	-0.169123	0.515413		0.418904	-0.262635	NaN	NaN		NaN	NaN	25.6597	26.0643	26.044	25.6535	25.7532	25.909	25.6374	25.8026	25.8207	NaN	NaN	NaN	NaN	NaN	NaN
1941	15	8	69.1	37.377	0	323.31	27079000000	268	P62873;P62873-2;P16520-2;P16520	P62873;P62873-2	Guanine nucleotide-binding protein G(I)/G(S)/G(T) subunit beta-1	GNB1			-0.15029	0.502903		0.541179	-0.238308	-0.383667	1.79016		0.0643052	-0.643668	0.265219	2.40426		0.192889	0.487189	30.3143	30.2056	30.0658	29.8482	30.0617	30.2249	29.7428	29.9387	29.7532	31.3583	31.4046	31.3467	31.558	31.6963	31.651
1968	14	14	89.6	18.658	0	64.993	3661000000	117	P63208;P63208-2	P63208;P63208-2	S-phase kinase-associated protein 1	SKP1			-0.148926	0.357764		0.566843	-0.221165	-0.336599	1.64087		0.0889045	-0.567015	0.63534	1.1975		0.0563237	0.847822	27.4089	27.1941	27.2976	26.8621	27.1697	27.4221	26.8733	26.9158	27.1017	27.9051	28.5658	28.3522	28.5981	29.0577	29.0733
366	7	7	37.6	29.81	0	87.68	6627600000	113	O43819	O43819	Protein SCO2 homolog, mitochondrial	SCO2	Known	+	-0.14835	4.16339		0.445106	-0.29164	0.390339	3.07952		0.050935	0.718564	-0.0888131	0.0683487		0.793563	-0.0931141	28.321	28.3157	28.3293	28.1662	28.1657	28.1891	28.6556	28.7968	28.6847	27.5908	27.7339	28.538	28.5546	27.5501	27.4915
5058	10	10	33.1	49.797	0	71.307	1551100000	49	Q9Y4P3	Q9Y4P3	Transducin beta-like protein 2	TBL2			-0.147931	0.18924		0.645087	-0.18513	-0.296791	0.45389		0.227588	-0.37963	0.465767	2.08959		0.0641725	0.782326	27.0722	26.6856	26.1154	26.288	26.6705	26.471	26.3665	26.2349	26.3815	25.6268	25.3744	25.4087	25.8299	25.9772	26
294	17	17	35.4	88.828	0	67.842	1444700000	83	O43264;O43264-2	O43264;O43264-2	Centromere/kinetochore protein zw10 homolog	ZW10			-0.147902	0.463706		0.552273	-0.231867	-0.338127	2.43382		0.0757125	-0.608636	0.418374	0.916986		0.126047	0.58672	26.3352	26.2993	26.2234	25.9384	26.0835	26.3924	25.9529	26.0227	25.868	26.5481	26.3135	26.0621	26.6783	27.0248	26.4756
2029	5	5	29.9	17.779	0	16.46	13013000000	104	P83731	P83731	60S ribosomal protein L24	RPL24			-0.147843	0.27004		0.600075	-0.205567	-0.486326	2.04874	+	0.034496	-0.807478	0.355393	1.38846		0.131516	0.573768	29.209	29.1425	29.1728	28.6013	29.1552	29.3243	28.49	28.815	28.7603	30.1862	30.0382	30.2474	30.3259	30.677	30.5351
1513	7	7	41.2	18.565	0	42.825	8853100000	134	P46778	P46778	60S ribosomal protein L21	RPL21			-0.147217	0.412199		0.560843	-0.22586	-0.633526	1.62562	+	0.0249756	-0.934159	0.576391	1.33639		0.0594293	0.821327	28.166	27.9235	27.7956	27.6465	28.0106	27.7864	27.1286	27.6011	27.2549	29.8497	30.1922	30.2341	30.3783	30.9341	30.6928
2787	8	8	4.6	228.52	0	10.164	10344000000	50	Q5TZA2;Q5TZA2-2;Q8IVE0	Q5TZA2;Q5TZA2-2	Rootletin	CROCC			-0.146479	0.443145		0.559182	-0.228173	-0.0775312	0.154942		0.75267	-0.112829	-0.0484854	0.0505398		0.869464	-0.0584492	29.0911	29.3695	29.4515	29.3069	28.9932	29.1726	28.9225	29.3868	29.3703	27.6909	27.6961	27.4388	27.1602	27.3309	28.1892
4055	2	2	4.8	73.488	0	12.277	124470000	14	Q9BVL4	Q9BVL4	Selenoprotein O	SELO	Predicted	+	-0.146453	0.603928		0.541318	-0.243015	0.266122	1.14899		0.170126	0.437038	NaN	NaN		NaN	NaN	22.9403	23.0078	22.9998	NaN	22.9689	22.7035	23.1992	23.4535	23.0936	NaN	NaN	NaN	NaN	NaN	NaN
1554	6	6	11.6	81.742	0	28.853	1342900000	37	P48960-2;P48960-3;P48960	P48960-2;P48960-3;P48960	CD97 antigen;CD97 antigen subunit alpha;CD97 antigen subunit beta	CD97			-0.146245	0.701841		0.528122	-0.245774	-0.344194	1.92775		0.0789796	-0.595021	NaN	NaN		NaN	NaN	26.5895	26.4914	26.5538	26.2766	26.3436	26.5757	26.318	26.0666	26.2175	NaN	NaN	NaN	NaN	NaN	NaN
4037	5	5	41	11.438	0	16.314	1451200000	44	Q9BV40	Q9BV40	Vesicle-associated membrane protein 8	VAMP8			-0.145711	0.932202		0.514559	-0.254264	-0.273162	1.27961		0.156866	-0.455181	NaN	NaN		NaN	NaN	26.6142	26.7098	26.5837	26.4656	26.3965	26.6085	26.5478	26.2634	26.2769	NaN	NaN	NaN	NaN	NaN	NaN
5147	4	3	21.4	31.979	0	35.217	533850000	19	Q9Y6W5-2;Q9Y6W5	Q9Y6W5-2;Q9Y6W5	Wiskott-Aldrich syndrome protein family member 2	WASF2			-0.145418	0.305769		0.591308	-0.209624	-0.334232	1.10799		0.110885	-0.520731	NaN	NaN		NaN	NaN	25.3171	24.955	25.1699	24.6779	25.1379	25.1899	24.6305	24.9512	24.8576	NaN	NaN	NaN	NaN	NaN	NaN
2499	8	8	35.6	36.775	0	30.535	742880000	45	Q15257-2;Q15257;Q15257-3;Q15257-4	Q15257-2;Q15257;Q15257-3;Q15257-4	Serine/threonine-protein phosphatase 2A activator	PPP2R4			-0.14369	0.0785032		0.760349	-0.125488	-0.489919	0.365803		0.14962	-0.46237	0.416275	0.624735		0.165687	0.520484	24.4908	24.9603	24.4946	23.2566	25.0474	25.2107	23.1017	24.8566	24.5176	26.5013	26.639	26.4755	26.3856	27.3768	27.1021
3213	18	18	21.4	120.26	0	47.303	853410000	45	Q8N1F8	Q8N1F8	Serine/threonine-protein kinase 11-interacting protein	STK11IP			-0.143281	0.711989		0.537609	-0.242057	-0.561633	1.78869	+	0.0295851	-0.876503	NaN	NaN		NaN	NaN	25.4833	25.3768	25.5844	25.2011	25.3849	25.4286	24.7033	25.1443	24.912	NaN	NaN	NaN	NaN	NaN	NaN
1135	19	19	63.4	43.941	0	91.235	3892500000	130	P21283	P21283	V-type proton ATPase subunit C 1	ATP6V1C1			-0.143009	1.01679		0.516104	-0.252658	-0.286588	1.99066		0.117476	-0.509369	0.103232	0.358506		0.637893	0.166513	27.7631	27.6237	27.654	27.6155	27.554	27.4424	27.3049	27.4163	27.4599	27.8822	27.8458	27.9536	27.7661	28.1006	28.1246
134	17	15	38.2	63.704	0	82.571	3011500000	79	O00425;O00425-2	O00425	Insulin-like growth factor 2 mRNA-binding protein 3	IGF2BP3			-0.142836	0.41361		0.567739	-0.220814	-0.392932	1.42236		0.0691928	-0.625105	0.145153	0.373342		0.540894	0.21896	27.1916	27.1037	26.8254	26.7402	26.8778	27.0742	26.5777	26.7792	26.585	27.9855	27.9252	27.9664	27.9497	28.428	27.9349
775	21	21	67.6	36.112	0	164.57	4134300000	156	P05198	P05198	Eukaryotic translation initiation factor 2 subunit 1	EIF2S1			-0.142771	0.401226		0.569367	-0.219423	-0.440266	2.32466	+	0.0417053	-0.76239	0.749137	2.18218	+	0.0444615	1.16249	26.0107	26.008	26.0241	25.6677	25.7813	26.1654	25.4843	25.7279	25.5098	29.3309	29.2247	29.4696	29.8571	30.127	30.2885
766	14	14	47.5	34.893	0	58.936	14681000000	256	P05026-2;P05026	P05026-2;P05026	Sodium/potassium-transporting ATPase subunit beta-1	ATP1B1			-0.142389	0.431798		0.566269	-0.222101	-0.33891	1.68392		0.0851005	-0.573045	0.301689	1.30442		0.185739	0.495903	29.4258	29.3909	29.1544	29.0107	29.1397	29.3935	29.0481	28.9367	28.9696	30.3161	30.4648	30.6319	30.7625	30.8786	30.6768
2479	11	11	25.5	46.691	0	50.749	10264000000	213	Q15070-2;Q15070;Q15070-3	Q15070-2;Q15070	Mitochondrial inner membrane protein OXA1L	OXA1L	Known	+	-0.142064	0.664627		0.541528	-0.238008	0.392386	2.08871		0.058423	0.67608	0.206559	0.39164		0.435878	0.28588	28.7617	28.7075	28.5356	28.3965	28.5509	28.6312	29	29.1429	29.0392	29.7052	29.2197	29.5503	29.3804	29.9634	29.7511
2918	42	42	63.5	105.79	0	323.31	55045000000	721	Q6UB35;Q6UB35-2	Q6UB35	Monofunctional C1-tetrahydrofolate synthase, mitochondrial	MTHFD1L	Known	+	-0.141643	3.37847		0.473788	-0.276039	-0.0111313	0.226413		0.951011	-0.0214381	0.117205	0.764105		0.565897	0.205412	31.6544	31.6515	31.6515	31.488	31.511	31.5334	31.6029	31.6609	31.6601	30.4743	30.4662	30.305	30.4587	30.6112	30.5272
4648	24	24	69.3	33.419	0	104.45	17983000000	298	Q9P015	Q9P015	39S ribosomal protein L15, mitochondrial	MRPL15	Known	+	-0.141479	1.2153		0.513578	-0.255056	-0.272257	2.4975		0.120801	-0.50141	0.0076561	0.0169403		0.962773	0.0117783	29.8395	29.7436	29.8858	29.675	29.624	29.7454	29.5386	29.5435	29.57	30.1673	30.3336	30.1718	30.4827	30.2131	29.9999
1603	10	7	30.6	50.98	0	86.484	1091500000	64	P49840	P49840	Glycogen synthase kinase-3 alpha	GSK3A			-0.141157	0.54864		0.556896	-0.229961	-0.349153	1.52586		0.084603	-0.576498	0.337643	0.77582		0.198435	0.481963	25.8461	25.9709	25.9191	25.555	25.8816	25.8759	25.3648	25.6508	25.673	26.1253	25.8634	25.8974	25.9432	26.5493	26.4065
2646	7	7	13.5	62.73	0	18.349	685640000	60	Q32NB8;Q32NB8-3;Q32NB8-2;Q32NB8-4	Q32NB8;Q32NB8-3;Q32NB8-2	CDP-diacylglycerol--glycerol-3-phosphate 3-phosphatidyltransferase, mitochondrial	PGS1	Known		-0.140968	0.419351		0.569406	-0.219153	0.520196	2.55535	+	0.0284356	0.898086	0.529132	1.9527		0.0546765	0.855356	24.7186	24.6666	24.9239	24.3957	24.6968	24.7936	25.2831	25.3104	25.2761	25.4913	25.1829	25.3483	26.0196	25.8352	25.7552
3941	5	5	47.1	12.266	0	11.228	5881200000	72	Q9BQC6	Q9BQC6	Ribosomal protein 63, mitochondrial	MRPL57	Known	+	-0.14089	0.516818		0.559273	-0.227376	-0.22474	2.13357		0.192806	-0.412584	-0.673668	1.51063	+	0.0507477	-0.998325	28.6204	28.5395	28.484	28.1971	28.4402	28.584	28.2917	28.3157	28.3624	27.2355	26.9809	26.8519	26.4791	NaN	26.2191
269	14	14	55.1	39.93	0	89.124	1510100000	77	O15372	O15372	Eukaryotic translation initiation factor 3 subunit H	EIF3H			-0.140825	0.168573		0.673053	-0.174352	-0.4156	1.08289		0.0754806	-0.627958	NaN	NaN		NaN	NaN	24.6108	24.982	24.6643	24.2507	24.9723	NaN	NaN	24.4196	24.2538	NaN	NaN	NaN	NaN	NaN	NaN
2880	10	10	20.7	72.063	0	30.434	1240200000	50	Q6P1M0;Q6P1M0-2	Q6P1M0	Long-chain fatty acid transport protein 4	SLC27A4			-0.140523	0.387487		0.577495	-0.215268	-0.0586122	0.135893		0.807361	-0.0889213	0.374724	0.408874		0.261778	0.421465	26.1542	25.8311	25.6845	25.6333	25.7611	25.854	25.8597	25.6844	25.95	26.3632	25.6371	25.908	26.0028	26.9967	26.0331
4954	10	10	37.6	40.542	0	63.164	1192900000	62	Q9Y295	Q9Y295	Developmentally-regulated GTP-binding protein 1	DRG1			-0.140401	0.779521		0.539031	-0.240808	-0.273033	1.82549		0.131072	-0.48178	-0.0842628	0.0853711		0.782419	-0.0991431	25.432	25.3671	25.4705	25.1484	25.2835	25.4164	25.0941	25.2691	25.0872	27.369	27.2631	27.4387	26.6034	27.7608	27.4538
1609	13	13	23	80.592	0	55.111	2439100000	95	P49959;P49959-3;P49959-2	P49959;P49959-3;P49959-2	Double-strand break repair protein MRE11A	MRE11A			-0.140363	0.455366		0.566314	-0.221778	-0.528603	3.67521	+	0.0249512	-0.976857	0.619404	1.57997		0.0508145	0.910777	27.1133	27.0372	27.0634	26.6931	26.9547	27.1451	26.4935	26.6093	26.5254	26.8854	26.5914	26.9245	27.1471	27.6476	27.4647
1048	6	6	28	34.932	0	28.762	2871200000	41	P16422	P16422	Epithelial cell adhesion molecule	EPCAM			-0.140168	0.444034		0.567412	-0.220524	-0.686744	2.14669	+	0.0252448	-1.08069	NaN	NaN		NaN	NaN	27.8881	27.6913	27.6212	27.4056	27.5894	27.7852	27.1137	27.1938	26.8329	NaN	NaN	NaN	NaN	NaN	NaN
14	19	19	56.1	42.932	0	89.677	6458100000	187	A4D1E9;A4D1E9-2;A4D1E9-3	A4D1E9;A4D1E9-2	GTP-binding protein 10	GTPBP10	Known	+	-0.139846	1.30076		0.514752	-0.25409	-0.287786	2.86874		0.101077	-0.536735	0.0751108	1.10754		0.68843	0.141215	28.4625	28.5736	28.5583	28.3606	28.35	28.4643	28.2637	28.234	28.2333	28.2279	28.1782	28.2649	28.2919	28.3357	28.2688
1685	11	9	47.7	45.671	0	159.26	1502800000	43	P52597	P52597	Heterogeneous nuclear ribonucleoprotein F;Heterogeneous nuclear ribonucleoprotein F, N-terminally processed	HNRNPF			-0.139289	0.149105		0.686994	-0.16426	-0.682258	1.21499	+	0.028088	-0.893182	0.657407	1.12051		0.0559197	0.847271	24.889	25.5096	25.6305	25.0457	24.8512	25.7144	24.5649	24.4998	24.9177	27.9376	27.5206	27.8109	28.0784	28.895	28.2678
2243	18	18	70.3	30.156	0	163.04	14721000000	427	Q13084	Q13084	39S ribosomal protein L28, mitochondrial	MRPL28	Known	+	-0.139222	0.652174		0.549755	-0.233381	-0.182063	1.78533		0.293693	-0.333608	-0.0495491	0.20444		0.814027	-0.0834732	29.1319	29.1987	29.206	28.8649	29.0688	29.1853	28.9344	28.987	29.0691	30.3727	30.463	30.3605	30.4845	30.3785	30.1845
493	24	23	58.9	54.366	0	323.31	50133000000	593	O75439	O75439	Mitochondrial-processing peptidase subunit beta	PMPCB	Known	+	-0.139004	2.07615		0.500703	-0.262911	0.263906	3.14422		0.122091	0.499715	0.192018	1.49765		0.351872	0.343295	31.2607	31.2949	31.3261	31.1981	31.1359	31.1307	31.5309	31.5989	31.5437	31.088	30.9824	31.0995	31.319	31.1616	31.2653
858	18	11	63.3	40.532	0	285.1	11764000000	143	P08754	P08754	Guanine nucleotide-binding protein G(k) subunit alpha	GNAI3			-0.138913	0.874013		0.537239	-0.242016	-0.624595	3.14642	+	0.0265045	-1.10265	0.575471	2.12827	+	0.0501687	0.935899	28.7621	28.6154	28.6789	28.4555	28.5228	28.6613	28.0252	28.1616	27.9957	30.3897	30.5655	30.4823	30.8694	31.2255	31.069
248	4	4	15.6	26.825	0	8.0518	446320000	10	O15162-2;O15162	O15162-2;O15162	Phospholipid scramblase 1	PLSCR1			-0.138907	0.880156		0.540809	-0.244769	NaN	NaN		NaN	NaN	NaN	NaN		NaN	NaN	24.7263	24.7408	NaN	24.6978	24.5303	24.5557	NaN	24.4152	NaN	NaN	NaN	NaN	NaN	NaN	NaN
2427	12	12	27.5	70.294	0	56.581	1362400000	61	Q14677-3;Q14677-2;Q14677	Q14677-3;Q14677-2;Q14677	Clathrin interactor 1	CLINT1			-0.138899	0.342665		0.594965	-0.208	-0.446424	1.8372	+	0.0481373	-0.733993	0.437648	1.34336		0.0889	0.670868	26.1181	26.1662	25.842	25.8211	25.7234	26.1652	25.6131	25.5215	25.6525	27.0273	26.8226	27.0646	27.161	27.4526	27.6138
3936	7	7	14.2	76.666	0	17.258	111970000	18	Q9BQ70	Q9BQ70	Transcription factor 25	TCF25			-0.138688	0.505898		0.564308	-0.223707	-0.280177	1.00788		0.164799	-0.444417	NaN	NaN		NaN	NaN	22.5708	22.7424	22.3388	22.4599	22.4081	22.3679	22.2497	22.3792	22.1825	NaN	NaN	NaN	NaN	NaN	NaN
556	32	32	55.1	69.223	0	206.66	31388000000	503	O76031	O76031	ATP-dependent Clp protease ATP-binding subunit clpX-like, mitochondrial	CLPX	Known	+	-0.138623	2.72621		0.491726	-0.267093	0.0664349	1.42396		0.71637	0.12734	0.0056413	0.0438956		0.96532	0.0103727	30.7076	30.6731	30.72	30.5647	30.5821	30.538	30.7829	30.7335	30.7835	30.3449	30.4019	30.3325	30.4277	30.2957	30.3729
3288	3	3	9.3	66.615	0	14.807	354530000	17	Q8NAT1	Q8NAT1	Protein O-linked-mannose beta-1,4-N-acetylglucosaminyltransferase 2	POMGNT2			-0.138564	0.347732		0.594672	-0.208278	0.202002	0.404003		0.380295	0.283745	NaN	NaN		NaN	NaN	24.6823	24.179	24.5043	24.1915	24.308	24.4504	24.567	24.9542	24.4504	NaN	NaN	NaN	NaN	NaN	NaN
1578	27	20	59.1	56.888	0	133.56	9139700000	179	P49590;P49590-2	P49590;P49590-2	Probable histidine--tRNA ligase, mitochondrial	HARS2	Known		-0.138447	1.481		0.513568	-0.254816	0.273474	2.25699		0.122958	0.497002	0.239254	1.3431		0.272819	0.410166	28.6527	28.7735	28.6918	28.5373	28.5488	28.6166	28.9155	29.0381	28.9848	29.4726	29.3176	29.2107	29.6111	29.5049	29.6025
2401	17	17	42.5	70.973	0	59.364	1975500000	87	Q14258	Q14258	E3 ubiquitin/ISG15 ligase TRIM25	TRIM25			-0.138269	0.548143		0.561018	-0.226082	-0.298506	1.85959		0.109636	-0.522541	0.117933	0.330559		0.607	0.182298	26.766	26.8131	26.7729	26.4245	26.7565	26.7562	26.3826	26.6185	26.4555	27.0031	26.9848	27.2412	27.0448	27.435	27.1031
2025	9	9	67.2	14.226	0	53.955	12731000000	190	P82932	P82932	28S ribosomal protein S6, mitochondrial	MRPS6	Known	+	-0.13818	3.75358		0.482236	-0.2708	-0.230065	4.08082		0.162607	-0.447493	-0.111207	1.08237		0.56949	-0.202821	29.4642	29.4859	29.4878	29.328	29.3436	29.3516	29.264	29.2581	29.2256	29.4184	29.3936	29.3911	29.354	29.197	29.3184
987	9	9	50.6	19.595	0	207.92	7202400000	141	P13693;P13693-2;Q56UQ5;Q9HAU6	P13693;P13693-2	Translationally-controlled tumor protein	TPT1			-0.137856	0.344559		0.59754	-0.207071	-0.648946	1.97831	+	0.0239603	-1.00925	0.348827	1.23832		0.143845	0.551692	28.3128	28.2961	28.3133	27.8411	28.3711	28.2965	27.3917	27.8805	27.7032	29.5331	29.5367	29.4818	29.6752	30.1171	29.8058
478	4	4	28	19.752	0	11.369	2577500000	57	O75352-2;O75352	O75352-2;O75352	Mannose-P-dolichol utilization defect 1 protein	MPDU1			-0.137838	0.672852		0.550781	-0.232447	-0.114768	0.742435		0.545153	-0.20102	NaN	NaN		NaN	NaN	27.4829	27.3405	27.2678	27.1067	27.2278	27.3431	27.2858	27.2765	27.1846	24.8696	24.3167	25.0121	25.0541	NaN	NaN
416	21	21	24.1	138.91	0	56.202	1652400000	82	O60610-2;O60610-3;O60610	O60610-2;O60610-3;O60610	Protein diaphanous homolog 1	DIAPH1			-0.137648	0.133775		0.701886	-0.156583	-0.355076	1.6023		0.08078	-0.590253	0.0236397	0.0389435		0.924322	0.0334767	26.3044	26.0614	26.3078	25.3504	26.5207	26.3897	25.966	25.8845	25.758	27.0085	27.2923	27.2523	26.8558	27.4883	27.28
4278	10	10	35.1	42.321	0	61.52	2529800000	49	Q9H4I3;Q9H4I3-2	Q9H4I3;Q9H4I3-2	TraB domain-containing protein	TRABD	Predicted		-0.137342	0.479426		0.568435	-0.219953	-0.239977	1.52564		0.18584	-0.419084	-0.237397	0.33519		0.412845	-0.299652	26.8734	26.6603	26.8627	26.4771	26.6728	26.8345	26.5222	26.5971	26.5573	27.5837	27.6335	27.7295	27.9526	27.3174	26.9645
3418	17	17	16.6	146.27	0	35.178	914860000	58	Q8TEW0-6;Q8TEW0-11;Q8TEW0-2;Q8TEW0;Q8TEW0-3;Q8TEW0-7;Q8TEW0-4;Q8TEW0-5;Q8TEW0-9;Q8TEW0-10;Q8TEW0-8	Q8TEW0-6;Q8TEW0-11;Q8TEW0-2;Q8TEW0;Q8TEW0-3;Q8TEW0-7;Q8TEW0-4;Q8TEW0-5;Q8TEW0-9;Q8TEW0-10;Q8TEW0-8	Partitioning defective 3 homolog	PARD3			-0.137306	0.325156		0.603556	-0.203872	-0.829238	2.73295	+	0.0104333	-1.35226	0.690624	1.12345		0.0524044	0.875208	25.6707	25.3465	25.5578	25.1014	25.4891	25.5726	24.7475	24.7667	24.573	25.1727	26.1085	25.8979	26.4557	26.3048	26.4905
15	30	30	15.5	266.94	0	96.073	1404500000	120	A5YKK6;A5YKK6-2;A5YKK6-3;A5YKK6-4	A5YKK6;A5YKK6-2;A5YKK6-3;A5YKK6-4	CCR4-NOT transcription complex subunit 1	CNOT1			-0.136573	0.213623		0.650424	-0.182527	-0.424135	2.34011	+	0.046231	-0.739019	0.271528	0.334057		0.376938	0.325094	26.0495	25.9558	25.991	25.4033	25.9346	26.2487	25.6739	25.4428	25.6072	26.8968	27.3083	26.9081	26.8678	27.8988	27.1611
1713	37	37	39.9	138.34	0	131.55	4046000000	154	P53621;P53621-2	P53621;P53621-2	Coatomer subunit alpha;Xenin;Proxenin	COPA			-0.135873	0.198931		0.659144	-0.178106	-0.0647647	0.118992		0.80036	-0.0927468	0.110215	0.295584		0.631907	0.169261	26.8313	26.8055	26.8501	26.1824	26.8426	27.0543	26.4604	27.1357	26.6965	28.996	29.4046	29.3497	29.3949	29.4789	29.2071
928	8	8	21	48.344	0	21.848	1449300000	49	P11117;P11117-2	P11117;P11117-2	Lysosomal acid phosphatase	ACP2			-0.135436	1.84639		0.514924	-0.254282	0.0187143	0.0555061		0.92971	0.0303625	NaN	NaN		NaN	NaN	26.3975	26.4916	26.399	26.3047	26.2743	26.3028	26.2398	26.4802	26.6242	NaN	NaN	NaN	NaN	NaN	NaN
3883	6	6	67.8	18.023	0	97.201	4234200000	83	Q99595	Q99595	Mitochondrial import inner membrane translocase subunit Tim17-A	TIMM17A	Known	+	-0.135125	1.05222		0.538451	-0.241149	-0.550567	3.10262	+	0.0240985	-0.982935	1.55681	1.48633	+	0.0535652	1.70555	27.7165	27.8062	27.7391	27.7114	27.6207	27.5244	27.3107	27.1441	27.1554	NaN	26.9318	27.6097	28.3272	29.0142	29.1413
4596	4	4	33.8	22.876	0	16.639	808240000	24	Q9NXU5	Q9NXU5	ADP-ribosylation factor-like protein 15	ARL15			-0.134803	0.683517		0.56121	-0.230791	-0.376212	2.08927		0.0621547	-0.651967	NaN	NaN		NaN	NaN	25.8567	25.6638	25.6604	NaN	25.6027	25.5817	25.4309	25.33	25.2914	NaN	NaN	NaN	NaN	NaN	NaN
3506	13	13	24	74.518	0	75.784	5327300000	112	Q92544	Q92544	Transmembrane 9 superfamily member 4	TM9SF4	Predicted		-0.133853	1.16777		0.537748	-0.241657	-0.0065244	0.0377067		0.971713	-0.011678	0.948964	0.613873		0.0633041	0.79479	28.0054	28.0726	28.008	27.7993	27.922	27.9632	27.9153	28.0936	28.0576	28.2278	26.5491	28.8182	28.5377	28.9111	28.9931
682	5	5	12.2	63.243	0	9.7923	714880000	12	O95870;O95870-2	O95870;O95870-2	Abhydrolase domain-containing protein 16A	ABHD16A	Predicted		-0.133713	0.782144		0.554126	-0.231001	0.196508	0.879695		0.306944	0.325327	NaN	NaN		NaN	NaN	25.4548	25.235	25.2955	25.1075	25.2313	25.2453	25.5833	25.6262	25.3653	NaN	25.567	NaN	NaN	NaN	NaN
3207	3	2	24.8	15.689	0.00025355	6.8937	136250000	10	Q8N138-4;Q8N138	Q8N138-4;Q8N138	ORM1-like protein 3	ORMDL3			-0.133412	0.368601		0.617437	-0.210011	0.0427027	0.296658		0.84706	0.0772184	NaN	NaN		NaN	NaN	NaN	23.2209	23.231	NaN	22.9574	23.2277	NaN	23.3214	23.2159	NaN	NaN	NaN	NaN	NaN	NaN
991	20	20	71.2	35.079	0	269.77	91977000000	539	P13804;P13804-2	P13804;P13804-2	Electron transfer flavoprotein subunit alpha, mitochondrial	ETFA	Known	+	-0.133287	1.76886		0.52228	-0.249662	0.136742	1.58444		0.434324	0.253401	-0.231143	0.690786		0.33574	-0.354327	32.3217	32.376	32.4302	32.2581	32.2529	32.217	32.5474	32.5247	32.4659	30.4792	30.8754	30.7182	30.6567	30.3338	30.389
1657	11	11	57.1	37.025	0	170.65	2086800000	131	P51665	P51665	26S proteasome non-ATPase regulatory subunit 7	PSMD7			-0.133146	0.436289		0.588561	-0.211082	-0.328922	1.55522		0.0952415	-0.550604	0.34509	0.402119		0.283345	0.399652	24.9002	24.8784	24.8094	24.5588	24.9798	24.6499	24.3531	24.6658	24.5822	28.2061	28.907	28.7841	28.4698	28.9805	29.4822
1682	11	11	74	23.207	0	250.98	17307000000	236	P52565;P52565-2	P52565;P52565-2	Rho GDP-dissociation inhibitor 1	ARHGDIA			-0.132641	0.198006		0.665694	-0.175063	-0.546211	1.43876	+	0.0343586	-0.807401	0.467358	1.36915		0.0775978	0.708745	29.0523	28.8629	28.6783	28.2659	29.0021	28.9276	28.0805	28.5641	28.3103	31.2591	31.3281	31.4573	31.5623	32.0764	31.8079
2399	22	22	54.4	47.064	0	145.01	21013000000	349	Q14254	Q14254	Flotillin-2	FLOT2			-0.132219	1.61498		0.5283	-0.246	0.0491905	0.392924		0.807627	0.0889766	0.479601	1.90766		0.0647092	0.785184	30.2161	30.1506	30.0963	30.0215	29.9977	30.0471	30.1618	30.2833	30.1654	29.8009	29.5981	29.8131	30.1235	30.389	30.1384
1265	4	3	26.8	15.693	0	8.52	182260000	8	P29373	P29373	Cellular retinoic acid-binding protein 2	CRABP2			-0.131937	0.565538		0.576092	-0.220533	0.327159	0.794232		0.138346	0.473976	NaN	NaN		NaN	NaN	23.5836	23.6857	23.5189	NaN	23.3626	23.5657	23.6632	24.2786	23.8279	NaN	NaN	NaN	NaN	NaN	NaN
3944	26	2	76.8	49.895	0	30.108	2163400000	18	Q9BQE3	Q9BQE3	Tubulin alpha-1C chain	TUBA1C			-0.131824	0.948402		0.549585	-0.233302	0.034722	0.152782		0.876041	0.0593666	NaN	NaN		NaN	NaN	27.165	27.1112	27.1197	26.8745	27.0669	27.0589	27.0641	27.3314	27.1045	NaN	NaN	NaN	NaN	NaN	NaN
938	11	6	53.9	23.567	0	127.36	8047100000	72	P11233	P11233	Ras-related protein Ral-A	RALA			-0.131663	0.662711		0.56399	-0.223149	-0.245445	1.93727		0.166881	-0.441772	0.419866	2.22864		0.0739687	0.725711	28.4813	28.4299	28.3355	28.1742	28.2396	28.4378	28.1406	28.241	28.1288	29.6568	29.7217	29.7096	29.9659	30.2122	30.1695
2991	15	15	46.3	49.237	0	118.69	5670500000	154	Q7L592;Q7L592-2	Q7L592;Q7L592-2	NADH dehydrogenase [ubiquinone] complex I, assembly factor 7	NDUFAF7	Known	+	-0.131555	0.820569		0.557278	-0.229087	0.201075	1.25789		0.268732	0.34968	-0.433167	1.97312		0.0739291	-0.727056	27.9817	28.1611	28.2255	27.9654	28.0129	27.9954	28.3508	28.3298	28.291	28.6699	28.5716	28.3554	28.0815	28.1455	28.0704
1304	24	14	72.5	50.582	0	315.25	5049700000	166	P31150	P31150	Rab GDP dissociation inhibitor alpha	GDI1			-0.131336	0.302497		0.643692	-0.198954	0.168754	0.539714		0.421708	0.267361	0.741282	1.83794	+	0.0449051	1.09077	22.1981	NaN	22.317	21.9775	NaN	22.2749	22.4512	22.578	22.2496	29.7898	29.9723	30.1678	30.4993	30.9859	30.6685
3044	8	8	51.3	29.282	0	93.41	11300000000	150	Q7Z7H8;Q7Z7H8-2	Q7Z7H8;Q7Z7H8-2	39S ribosomal protein L10, mitochondrial	MRPL10	Known	+	-0.130919	1.08171		0.546794	-0.235087	0.207905	1.51518		0.241823	0.369013	0.189986	0.967822		0.382038	0.32095	29.1785	28.9911	29.1196	28.9888	28.9429	28.9647	29.2729	29.2738	29.3662	29.1318	29.3873	29.4151	29.5182	29.5204	29.4655
3684	6	6	65.2	12.107	0	44.154	20644000000	186	Q96EL3	Q96EL3	39S ribosomal protein L53, mitochondrial	MRPL53	Known	+	-0.130882	1.68782		0.532252	-0.244545	-0.00720024	0.056994		0.968017	-0.013244	0.0453345	0.237593		0.822665	0.0788288	30.0698	30.1631	30.1828	30.0176	30.0009	30.0046	30.1425	30.0813	30.1704	29.6503	29.7467	29.6712	29.7929	29.597	29.8143
308	23	18	41.7	70.942	0	122.93	3328600000	130	O43390;O43390-3;O43390-2;O43390-4	O43390;O43390-3;O43390-2;O43390-4	Heterogeneous nuclear ribonucleoprotein R	HNRNPR			-0.130643	0.0466747		0.82974	-0.0896129	-0.352056	0.159733		0.413502	-0.265287	1.06136	1.92451	+	0.0412152	1.42952	25.1168	26.6276	24.4436	26.0597	23.8542	25.8823	24.1453	25.0512	25.9354	29.0397	28.626	28.687	29.5893	30.2516	29.6959
1701	14	14	60.1	34.012	0	147.68	49193000000	372	P53007	P53007	Tricarboxylate transport protein, mitochondrial	SLC25A1	Known	+	-0.130283	2.33701		0.523073	-0.249226	-0.493798	4.08056	+	0.0256882	-0.93115	-0.29752	1.79435		0.167467	-0.518077	31.5805	31.5973	31.6403	31.4487	31.4964	31.4822	31.1168	31.1522	31.0677	30.8797	30.8864	30.7375	30.6008	30.4249	30.5852
4351	16	8	69.1	37.567	0	141.75	1710600000	50	Q9HAV0	Q9HAV0	Guanine nucleotide-binding protein subunit beta-4	GNB4			-0.129943	0.486983		0.58858	-0.210898	-0.431871	2.81478	+	0.0381099	-0.776609	0.600164	1.08761		0.0639235	0.790276	26.3102	26.3543	26.3392	26.0236	26.1712	26.4192	25.9618	25.9526	25.7937	26.756	27.1639	26.8894	27.1276	27.9233	27.559
3323	10	10	49.3	31.674	0	142.31	13169000000	224	Q8NCW5;Q8NCW5-2	Q8NCW5;Q8NCW5-2	NAD(P)H-hydrate epimerase	APOA1BP	Known	+	-0.129068	1.86331		0.535299	-0.243189	0.326951	2.97587		0.076	0.607121	0.189936	1.34355		0.360716	0.335509	29.4746	29.404	29.4617	29.278	29.3531	29.3219	29.7109	29.8145	29.7957	28.7574	28.6057	28.6919	28.8034	28.9697	28.8518
2656	2	2	6.7	33.672	0.00022847	4.4296	155640000	9	Q9H1U9;Q3SY17	Q9H1U9;Q3SY17	Solute carrier family 25 member 51;Solute carrier family 25 member 52	SLC25A51;SLC25A52	Known	+	-0.12884	1.00456		0.559283	-0.232362	NaN	NaN		NaN	NaN	NaN	NaN		NaN	NaN	23.6948	23.7464	23.6203	23.5947	23.522	NaN	NaN	NaN	NaN	NaN	NaN	NaN	NaN	NaN	NaN
387	5	5	6.5	116.07	0	15.789	641400000	22	O60245;O60245-2	O60245;O60245-2	Protocadherin-7	PCDH7			-0.12872	0.666697		0.5694	-0.219081	-0.312161	2.81223		0.084615	-0.577422	NaN	NaN		NaN	NaN	25.5438	25.4506	25.4106	25.2002	25.3481	25.4705	25.1667	25.1648	25.137	NaN	NaN	NaN	NaN	NaN	NaN
4563	10	10	31	51.603	0	74.121	2245000000	74	Q9NWS8;Q9NWS8-2	Q9NWS8;Q9NWS8-2	Required for meiotic nuclear division protein 1 homolog	RMND1	Known	+	-0.128712	1.02522		0.559671	-0.232653	0.0193933	0.164504		0.920288	0.0356244	-0.083526	0.261048		0.705439	-0.133105	26.7971	26.9267	26.8163	26.7035	NaN	26.7324	26.8976	26.8668	26.8339	27.6895	27.7162	27.3834	27.5253	27.3863	27.6269
1169	15	15	65.2	51.169	0	210.68	3303400000	123	P23258;Q9NRH3	P23258;Q9NRH3	Tubulin gamma-1 chain;Tubulin gamma-2 chain	TUBG1;TUBG2			-0.128313	0.297591		0.635571	-0.190106	-0.2554	0.783877		0.213671	-0.392745	0.462219	1.83178		0.0688486	0.754695	27.3995	27.3513	27.5639	26.9872	27.4351	27.5075	27.2002	27.4089	26.9394	27.5851	27.6208	27.6531	27.9307	28.2976	28.0172
1918	17	17	51.9	29.995	0	99.135	27720000000	255	P62424	P62424	60S ribosomal protein L7a	RPL7A			-0.128212	0.442051		0.60044	-0.205296	-0.542891	2.15069	+	0.0281569	-0.894657	0.425812	1.53666		0.0859031	0.678249	29.9736	29.9605	29.9173	29.5768	29.9661	29.9239	29.1972	29.5254	29.5002	31.7602	31.7098	31.8008	31.9648	32.398	32.1855
1947	7	7	46.7	15.86	0	28.421	8770400000	102	P62910	P62910	60S ribosomal protein L32	RPL32			-0.128203	0.976064		0.559222	-0.228303	-0.510695	2.60482	+	0.028212	-0.887489	0.531865	2.01378		0.0529394	0.865569	27.0251	27.0794	27.0215	26.7968	26.9791	26.9655	26.5238	26.6614	26.4086	30.4911	30.4966	30.4756	30.8135	31.2083	31.0371
4561	5	5	18.5	39.082	0	19.24	1259700000	37	Q9NWR8	Q9NWR8	Calcium uniporter regulatory subunit MCUb, mitochondrial	CCDC109B	Known	+	-0.127997	0.873077		0.561413	-0.225252	0.188284	1.10128		0.308391	0.324408	NaN	NaN		NaN	NaN	26.2543	26.3856	26.1591	26.1316	26.1734	26.11	26.4151	26.4016	26.5471	NaN	NaN	NaN	NaN	NaN	NaN
4940	20	20	42.7	66.726	0	128.22	3191800000	142	Q9Y262;Q9Y262-2	Q9Y262;Q9Y262-2	Eukaryotic translation initiation factor 3 subunit L	EIF3L			-0.125917	0.18305		0.685657	-0.165215	-0.632214	2.0462	+	0.0237962	-0.998471	0.436443	0.842666		0.124137	0.58945	27.1892	26.7806	26.9809	26.4418	27.2519	26.8792	26.3406	26.25	26.4634	28.5295	28.5752	28.6705	28.7187	28.8724	29.4934
1152	13	12	52.3	33.784	0	56.356	1924500000	56	P22087	P22087	rRNA 2-O-methyltransferase fibrillarin	FBL			-0.125676	0.394078		0.617507	-0.198015	-0.164204	0.485965		0.433961	-0.253784	1.01767	1.10752	+	0.0454022	1.09182	26.2758	26.6756	26.2961	26.2246	26.3006	26.3452	26.213	26.3851	26.1567	27.41	26.2429	27.3596	27.7557	28.4226	27.8872
924	50	50	77.3	61.054	0	323.31	1510000000000	13768	P10809;P10809-2	P10809	60 kDa heat shock protein, mitochondrial	HSPD1	Known	+	-0.125668	1.84549		0.543098	-0.236979	0.0997454	1.89944		0.569516	0.190654	0.134586	1.86994		0.486911	0.253028	36.2057	36.1579	36.2249	36.0615	36.0363	36.1138	36.2791	36.3188	36.2898	35.7463	35.8003	35.8484	35.9528	35.9107	35.9353
4279	3	3	35.5	11.441	0	9.2903	817290000	38	Q9H4I9	Q9H4I9	Essential MCU regulator, mitochondrial	SMDT1	Known	+	-0.125234	0.247899		0.658979	-0.178918	0.0701097	0.269247		0.743637	0.116035	NaN	NaN		NaN	NaN	25.5521	25.6917	25.5864	25.6275	25.7288	25.0983	25.6547	25.5293	25.8567	NaN	NaN	NaN	NaN	NaN	NaN
1387	7	7	30.8	34.36	0	27.479	2845100000	63	P35914;P35914-3;P35914-2	P35914	Hydroxymethylglutaryl-CoA lyase, mitochondrial	HMGCL	Known	+	-0.125204	1.11368		0.561927	-0.226463	0.140089	1.11366		0.44021	0.250537	0.269304	0.396559		0.352989	0.342168	27.1213	27.1192	26.973	26.9781	26.9103	26.9495	27.1705	27.1867	27.2766	27.3373	27.323	26.6959	27.0134	27.6635	27.4872
2019	20	20	40.7	48.006	0	70.068	11433000000	214	P82675;P82675-2	P82675	28S ribosomal protein S5, mitochondrial	MRPS5	Known	+	-0.125084	1.32348		0.556937	-0.229831	-0.339455	3.217		0.0674783	-0.634941	-0.671963	2.32809	+	0.0448968	-1.08732	28.9445	29.0565	29.0113	28.9389	28.8461	28.852	28.6839	28.667	28.643	30.3482	30.0733	29.9547	29.4815	29.4187	29.4602
1973	19	19	77.6	35.076	0	323.31	28090000000	434	P63244	P63244	Guanine nucleotide-binding protein subunit beta-2-like 1;Guanine nucleotide-binding protein subunit beta-2-like 1, N-terminally processed	GNB2L1	Predicted		-0.124866	0.345667		0.631941	-0.192188	-0.530608	2.5957	+	0.0265371	-0.916704	0.47551	1.43144		0.0742065	0.726497	30.1059	30.0634	29.9559	29.6316	30.0752	30.0438	29.4488	29.641	29.4436	31.6641	31.6325	31.7207	31.8787	32.4061	32.1591
4404	13	13	42.8	46.48	0	84.445	10610000000	168	Q9HDC9;Q9HDC9-2	Q9HDC9;Q9HDC9-2	Adipocyte plasma membrane-associated protein	APMAP			-0.124407	1.05795		0.563908	-0.224054	0.215633	2.13454		0.209299	0.397206	0.239655	1.37511		0.270936	0.412228	29.275	29.1756	29.1956	29.0498	29.0401	29.1832	29.3705	29.4595	29.4631	27.7785	27.6057	27.655	27.807	28.0252	27.9261
1791	6	6	24.8	33.403	0	31.237	684380000	16	P56962	P56962	Syntaxin-17	STX17	Known	+	-0.12439	0.35686		0.630505	-0.192816	0.285723	0.933414		0.164735	0.444287	NaN	NaN		NaN	NaN	25.5947	25.3149	25.1228	25.192	25.3129	25.1543	25.5834	25.7123	25.5939	NaN	NaN	NaN	NaN	NaN	NaN
2583	13	13	37	44.468	0	100.41	3545000000	93	Q16543	Q16543	Hsp90 co-chaperone Cdc37;Hsp90 co-chaperone Cdc37, N-terminally processed	CDC37			-0.124361	0.302565		0.643964	-0.186402	-0.337252	1.31497		0.0982275	-0.54386	0.705999	0.988964		0.0557674	0.845801	26.6306	26.5302	26.4173	26.17	26.6969	26.338	26.2155	26.3525	25.9983	29.0653	28.6688	29.0947	29.3021	30.2574	29.3874
1429	10	10	24.7	61.89	0	62.732	894450000	54	P40222	P40222	Alpha-taxilin	TXLNA			-0.123858	0.481627		0.606674	-0.202463	-0.468891	1.65544	+	0.0457133	-0.745362	0.299705	1.73135		0.16726	0.518358	25.3798	25.5386	25.3637	25.116	25.3554	25.4391	24.747	25.1484	24.98	26.0745	26.1247	26.292	26.4267	26.5479	26.4157
4986	18	18	64.7	42.033	0	119.51	33354000000	469	Q9Y2S7	Q9Y2S7	Polymerase delta-interacting protein 2	POLDIP2	Known	+	-0.123367	2.74238		0.54083	-0.238738	0.0923087	1.9999		0.599232	0.177499	0.0576878	0.581482		0.766779	0.105999	30.8426	30.7932	30.841	30.6973	30.7105	30.6989	30.9314	30.8944	30.9279	30.1441	30.2177	30.2943	30.2778	30.2606	30.2907
1756	35	35	26.6	206.8	0	159.27	4589900000	159	P55196;P55196-5;P55196-1;P55196-3;P55196-2;P55196-6	P55196;P55196-5;P55196-1;P55196-3;P55196-2;P55196-6	Afadin	MLLT4			-0.122838	0.239327		0.664438	-0.17493	-0.656361	2.35679	+	0.02472	-1.07041	0.1643	0.22365		0.560531	0.208794	28.1185	28.0109	27.9805	27.5244	28.0477	28.1693	27.4868	27.4841	27.17	28.384	28.0936	28.3176	27.8854	28.6581	28.7446
755	17	7	58.1	40.84	0	240.45	9437700000	110	P04439;P30455;P30443;P13746;P13746-2;P16188;P30459;P10314;P30512;P16189;Q09160;P30456;P30504	P04439;P30455;P30443;P13746;P13746-2;P16188	HLA class I histocompatibility antigen, A-3 alpha chain;HLA class I histocompatibility antigen, A-36 alpha chain;HLA class I histocompatibility antigen, A-1 alpha chain;HLA class I histocompatibility antigen, A-11 alpha chain;HLA class I histocompatibility antigen, A-30 alpha chain	HLA-A			-0.122687	0.511735		0.605887	-0.202765	-0.30754	1.4936		0.112993	-0.516591	NaN	NaN		NaN	NaN	29.3639	29.3383	29.35	29.064	29.1971	29.4231	28.9932	29.227	28.9094	NaN	NaN	NaN	NaN	NaN	NaN
2429	31	31	28.3	143.23	0	114.7	2619800000	103	Q14683	Q14683	Structural maintenance of chromosomes protein 1A	SMC1A			-0.122581	0.494741		0.608449	-0.201587	-0.384239	1.17237		0.0816812	-0.587428	0.287806	0.630547		0.274996	0.407894	26.7064	26.5933	26.7797	26.3836	26.66	26.668	26.0953	26.5836	26.2477	28.2435	28.206	28.2267	28.1027	28.7254	28.7116
3185	12	12	35	49.666	0	118.83	3647400000	75	Q8IYU8	Q8IYU8	Calcium uptake protein 2, mitochondrial	MICU2	Known	+	-0.122129	0.468745		0.614663	-0.199298	0.249573	1.06564		0.196856	0.40909	0.165632	0.234228		0.552636	0.212947	27.4526	27.3988	27.1118	27.1572	27.1624	27.2772	27.5715	27.5175	27.6229	28.2244	27.5408	27.5521	27.9021	27.6779	28.2342
3694	9	9	48.8	27.388	0	106.39	12293000000	138	Q96EY8	Q96EY8	Cob(I)yrinic acid a,c-diamide adenosyltransferase, mitochondrial	MMAB	Known	+	-0.12126	1.34992		0.564677	-0.223729	-0.103111	0.85031		0.582516	-0.185341	-0.227333	1.30689		0.294502	-0.390948	29.5781	29.66	29.5693	29.421	29.5196	29.503	29.4998	29.4153	29.5829	27.0158	26.8791	26.8695	26.8096	26.5796	26.6933
820	16	16	35.4	63.111	0	84.301	30304000000	217	P07686	P07686	Beta-hexosaminidase subunit beta;Beta-hexosaminidase subunit beta chain B;Beta-hexosaminidase subunit beta chain A	HEXB			-0.121202	0.974516		0.574743	-0.217102	0.19324	2.92007		0.242001	0.369095	0.323647	0.774388		0.21036	0.467315	30.8122	30.8129	30.8176	30.8036	30.6058	30.6697	30.9608	31.0267	31.035	27.9684	27.8573	27.386	27.9253	28.0855	28.1718
3976	15	15	59.3	32.477	0	203.47	23226000000	258	Q9BSH4	Q9BSH4	Translational activator of cytochrome c oxidase 1	TACO1	Known	+	-0.121119	0.929787		0.576391	-0.215942	0.300223	2.05288		0.10336	0.533287	0.346583	1.29456		0.142761	0.554101	30.1647	30.0084	30.1733	29.9704	30.0519	29.9609	30.4817	30.3792	30.3863	30.1439	30.0506	30.1738	30.2296	30.5893	30.5892
2249	14	10	15.9	133.97	0	38.935	390740000	32	Q13136-2;Q13136;O75334-6;O75334-5;O75334-4;O75334-3;O75334;O75334-8;O75334-7;O75334-2;O75335-2;O75335-1	Q13136-2;Q13136	Liprin-alpha-1	PPFIA1			-0.121024	0.260694		0.663875	-0.176681	-0.618734	1.94779	+	0.0248757	-0.968054	NaN	NaN		NaN	NaN	24.521	24.2891	24.5051	24.1299	24.1671	24.6551	23.672	24.0515	23.7355	NaN	NaN	NaN	NaN	NaN	NaN
3125	11	11	13.2	110.45	0	38.104	926340000	47	Q86YS7;Q86YS7-2;Q86YS7-3;Q86YS7-4;Q86YS7-5	Q86YS7;Q86YS7-2;Q86YS7-3;Q86YS7-4;Q86YS7-5	C2 domain-containing protein 5	C2CD5			-0.120783	0.240423		0.667986	-0.173032	-0.421474	3.44617	+	0.0365499	-0.784098	0.108206	0.242516		0.651443	0.160047	25.5839	25.518	25.5474	25.0363	25.5951	25.6555	25.1142	25.19	25.0806	25.8922	26.219	26.1323	25.8987	26.3659	26.3036
2475	32	32	25.4	186.49	0	112.06	2668700000	117	Q15058	Q15058	Kinesin-like protein KIF14	KIF14			-0.119919	0.114689		0.741177	-0.136323	-0.408635	1.07228		0.0765501	-0.601707	-0.0388037	0.0599115		0.879667	-0.0535627	26.9307	27.0726	27.1065	26.1786	27.4089	27.1626	26.2967	26.866	26.7212	27.54	28.0516	28.2961	27.9775	27.906	27.8879
2965	15	12	43.5	43.083	0	49.384	6780400000	88	Q70UQ0-4	Q70UQ0-4	Inhibitor of nuclear factor kappa-B kinase-interacting protein	IKBIP			-0.119745	0.78969		0.590778	-0.21008	0.0233129	0.171138		0.910596	0.0422709	NaN	NaN		NaN	NaN	28.6865	28.7765	28.815	28.5233	28.6833	28.7121	28.7194	28.7894	28.839	NaN	NaN	NaN	NaN	NaN	NaN
3671	8	8	51.4	24.115	0	109.14	8313000000	136	Q96E11-3;Q96E11;Q96E11-8;Q96E11-2;Q96E11-7;Q96E11-5;Q96E11-6;Q96E11-4	Q96E11-3;Q96E11;Q96E11-8;Q96E11-2	Ribosome-recycling factor, mitochondrial	MRRF	Known	+	-0.119633	2.2422		0.557649	-0.229099	-0.0491263	0.455634		0.805461	-0.0898942	0.0604108	0.496149		0.758555	0.109216	28.9032	28.87	28.8384	28.7284	28.7555	28.7689	28.7751	28.7828	28.9064	28.2414	28.3719	28.263	28.3405	28.4174	28.2997
2333	17	17	27	86.233	0	48.278	1181700000	40	Q13618-2;Q13618;Q13618-3	Q13618-2;Q13618;Q13618-3	Cullin-3	CUL3			-0.119603	0.208729		0.688566	-0.167038	-0.312185	0.59491		0.181372	-0.424947	NaN	NaN		NaN	NaN	25.9542	25.6714	26.1338	25.628	25.9724	NaN	25.4999	25.981	25.3419	NaN	NaN	NaN	NaN	NaN	NaN
1855	21	21	44.7	67.314	0	186.68	5178900000	139	P61221	P61221	ATP-binding cassette sub-family E member 1	ABCE1	Predicted		-0.119551	0.344957		0.644152	-0.185757	-0.275929	1.24555		0.155023	-0.456827	0.691519	1.50441	+	0.0508962	0.970396	28.058	27.9524	27.9391	27.596	28.0597	27.9351	27.5667	27.8932	27.6618	28.4962	28.6321	28.6826	28.9076	29.6059	29.3719
2494	20	20	77.5	32.66	0	279.46	13424000000	363	Q15181	Q15181	Inorganic pyrophosphatase	PPA1			-0.119179	0.247799		0.668531	-0.172636	-0.51675	1.36005	+	0.0416338	-0.762693	0.427915	1.6927		0.081171	0.696123	29.3391	29.2711	29.3076	28.8091	29.351	29.4001	28.5335	29.1276	28.7064	30.3215	30.25	30.289	30.5372	30.9242	30.6828
4474	5	5	50.4	14.651	0	37.083	1762200000	28	Q9NRP4	Q9NRP4	Succinate dehydrogenase assembly factor 3, mitochondrial	SDHAF3	Known		-0.119152	0.3531		0.644154	-0.186094	-0.0351601	0.122136		0.879099	-0.0581029	NaN	NaN		NaN	NaN	26.8736	26.5289	26.7997	26.4284	26.7106	26.7057	26.6839	26.6992	26.7136	NaN	NaN	NaN	NaN	NaN	NaN
1327	24	19	61.8	57.488	0	217.2	30410000000	342	P32189-1;P32189-4;P32189-2;P32189;Q14409	P32189-1;P32189-4;P32189-2;P32189;Q14409	Glycerol kinase;Putative glycerol kinase 3	GK;GK3P	Known		-0.119099	0.368975		0.642919	-0.187548	-0.0381133	0.139805		0.868007	-0.0634293	0.0755787	0.156276		0.75385	0.110973	31.0721	30.9433	30.727	30.7039	30.7062	30.975	30.8866	30.8774	30.8641	27.2825	27.5243	27.6956	27.3166	27.6382	27.7744
2379	4	4	5.1	88.8	0.00023513	5.0904	175900000	6	Q14156-2;Q14156;Q14156-3	Q14156-2;Q14156;Q14156-3	Protein EFR3 homolog A	EFR3A			-0.118862	0.502455		0.618358	-0.196982	-0.178518	0.819501		0.357795	-0.29709	NaN	NaN		NaN	NaN	23.6835	23.5324	23.4263	23.2939	23.4535	23.5382	23.2509	23.4861	23.3695	NaN	NaN	NaN	NaN	NaN	NaN
4230	12	11	16.8	138.99	0	29.99	621180000	44	Q9H2G2-2;Q9H2G2	Q9H2G2-2;Q9H2G2	STE20-like serine/threonine-protein kinase	SLK			-0.118366	0.201705		0.690031	-0.162985	-0.509437	2.95219	+	0.0275556	-0.908259	NaN	NaN		NaN	NaN	25.0532	25.121	25.178	24.6107	25.0021	25.3843	24.5121	24.6739	24.6379	NaN	NaN	NaN	NaN	NaN	NaN
2447	6	4	38.2	25.006	0	30.729	616560000	29	Q14964	Q14964	Ras-related protein Rab-39A	RAB39A			-0.117521	0.511468		0.629812	-0.197204	-0.193282	0.907958		0.316962	-0.327064	0.413951	1.13306		0.108591	0.616169	24.9659	25.2093	NaN	25.0183	24.9494	24.9425	24.8858	24.8932	24.904	25.0701	25.3632	25.3836	25.4111	25.856	25.7916
860	16	16	62.4	32.854	0	312.97	25252000000	356	P08865	P08865	40S ribosomal protein SA	RPSA	Predicted		-0.11583	0.291509		0.665562	-0.175297	-0.48761	2.33111	+	0.0318998	-0.832862	0.348408	1.54919		0.129454	0.577205	29.9374	29.9039	30.0125	29.5249	29.9447	30.0367	29.3831	29.622	29.3858	31.4541	31.3789	31.4246	31.6183	31.9608	31.7237
1399	58	58	70.8	100.4	0	323.31	133590000000	1269	P36776-2;P36776;P36776-3	P36776-2;P36776;P36776-3	Lon protease homolog, mitochondrial	LONP1	Known	+	-0.115763	3.07533		0.560906	-0.225725	0.0500641	1.18399		0.790785	0.0962995	0.105668	2.21059		0.569018	0.203208	32.7355	32.6968	32.715	32.5882	32.6099	32.602	32.7763	32.7876	32.7336	32.9067	32.8852	32.8452	33.0017	32.9731	32.9794
270	21	21	55.9	44.287	0	242.88	32074000000	428	O15382;O15382-2	O15382;O15382-2	Branched-chain-amino-acid aminotransferase, mitochondrial	BCAT2	Known	+	-0.115566	0.995688		0.594738	-0.208439	0.29987	1.62751		0.114948	0.513279	0.0800393	0.237738		0.72033	0.12654	30.7163	30.6731	30.8316	30.5901	30.6065	30.6778	31.117	30.9011	31.1026	29.3465	29.5578	29.534	29.7812	29.4976	29.3996
1985	28	17	72.3	50.14	0	323.31	179580000000	901	P68104;Q5VTE0;P68104-2	P68104;Q5VTE0;P68104-2	Elongation factor 1-alpha 1;Putative elongation factor 1-alpha-like 3	EEF1A1;EEF1A1P5			-0.115124	0.636635		0.616824	-0.197961	-0.713257	1.96639	+	0.0256709	-1.08328	0.534047	1.47764		0.0633671	0.800023	33.042	32.7811	32.8711	32.7619	32.7481	32.8388	31.9171	32.2556	32.3818	33.765	34.1634	33.9554	34.3205	34.7296	34.4358
997	5	5	25	14.177	0	13.202	4741400000	106	P13987	P13987	CD59 glycoprotein	CD59			-0.115053	0.411823		0.644282	-0.185949	0.0883439	0.378056		0.669407	0.147708	0.232826	1.68843		0.269396	0.413837	27.8521	27.7608	27.5471	27.5134	27.5434	27.758	27.8578	27.8339	27.7332	28.6527	28.6656	28.7333	28.8455	28.8743	29.0303
1714	16	16	49.9	51.853	0	194.39	17189000000	352	P53634;P53634-2;P53634-3	P53634	Dipeptidyl peptidase 1;Dipeptidyl peptidase 1 exclusion domain chain;Dipeptidyl peptidase 1 heavy chain;Dipeptidyl peptidase 1 light chain	CTSC			-0.114665	1.0691		0.594905	-0.208326	0.199224	2.62106		0.231513	0.37651	-0.112093	0.768371		0.578057	-0.197637	29.8066	29.786	29.8562	29.7821	29.6995	29.6232	29.9904	30.0558	30.0003	29.5031	29.4552	29.3927	29.2372	29.4417	29.3358
1633	7	7	31.2	23.432	0	21.512	10506000000	123	P50914	P50914	60S ribosomal protein L14	RPL14			-0.114442	0.300676		0.664042	-0.17481	-0.38377	1.59613		0.0684641	-0.628856	0.22946	1.78223		0.271751	0.411388	28.6918	28.7236	28.6635	28.2816	28.6583	28.7957	28.2583	28.518	28.1512	30.2395	30.1867	30.2312	30.3471	30.5377	30.461
2873	4	4	35.4	16.225	0	12.472	314720000	24	Q6NZ67;Q6P582	Q6NZ67;Q6P582	Mitotic-spindle organizing protein 2B;Mitotic-spindle organizing protein 2A	MZT2B;MZT2A			-0.113748	0.339659		0.65947	-0.178164	-0.138214	1.02781		0.450155	-0.245434	NaN	NaN		NaN	NaN	23.8698	23.7101	23.8403	23.4671	23.6963	23.9155	23.7116	23.7048	23.5892	NaN	NaN	NaN	NaN	NaN	NaN
190	8	8	56	14.285	0	27.21	5555800000	86	O14737;O14737-2	O14737;O14737-2	Programmed cell death protein 5	PDCD5			-0.113401	0.272212		0.67355	-0.170024	-0.232925	0.959947		0.227339	-0.379599	0.571835	2.06843	+	0.0500077	0.924231	28.3801	28.1834	28.3142	27.8837	28.4172	28.2366	27.9149	28.2459	28.0181	27.7405	27.8124	27.8585	28.1718	28.5647	28.3904
3062	18	2	55.8	46.277	0	188.62	2270600000	18	Q86TX2	Q86TX2	Acyl-coenzyme A thioesterase 1	ACOT1	Predicted		-0.113186	1.4649		0.593561	-0.21332	0.394524	3.59538	+	0.0459171	0.74135	NaN	NaN		NaN	NaN	27.0396	27.0623	27.1159	26.9472	26.9716	NaN	27.5057	27.4265	27.4692	NaN	NaN	NaN	NaN	NaN	NaN
3103	3	3	54.1	8.3755	0	23.596	1289200000	47	Q86WW8	Q86WW8	Cytochrome c oxidase assembly factor 5	COA5	Known	+	-0.111894	0.451487		0.64646	-0.184423	0.17127	1.10013		0.355001	0.298795	0.841976	3.87052	+	0.047322	1.50777	25.5926	25.785	25.796	25.7444	25.457	25.6365	25.9239	25.8327	25.9308	26.3166	26.1651	26.3365	27.1341	27.1391	27.0708
1881	4	4	68.2	9.1175	0	9.7076	2575100000	37	P61960;P61960-2	P61960;P61960-2	Ubiquitin-fold modifier 1	UFM1			-0.111614	0.609624		0.632907	-0.191737	-0.0595296	0.330892		0.773542	-0.103692	NaN	NaN		NaN	NaN	27.3832	27.2557	27.1873	27.0475	27.2078	27.2361	27.1235	27.2759	27.2482	NaN	NaN	NaN	NaN	NaN	NaN
1960	16	7	56.2	40.361	0	131.28	2669500000	61	P63096;P63096-2	P63096;P63096-2	Guanine nucleotide-binding protein G(i) subunit alpha-1	GNAI1			-0.111374	0.197782		0.705656	-0.155425	-0.165185	0.417902		0.446162	-0.247156	0.339359	0.81282		0.190954	0.489538	26.9103	26.8273	26.3912	26.3911	26.5263	26.8773	26.4876	26.5032	26.6425	28.1098	28.6434	28.2218	28.4874	28.8495	28.6562
1053	17	14	64.4	17.302	0	62.381	23428000000	147	P16949;P16949-2;Q9H169-3;Q9H169;Q9H169-4;Q9H169-2	P16949;P16949-2	Stathmin	STMN1			-0.109962	0.0811811		0.787795	-0.112382	-1.42275	0.704954	+	0.0238722	-1.00127	0.921522	1.15471	+	0.0453376	1.05282	30.1153	29.7858	29.8051	29.4804	30.7094	29.1866	26.7022	29.7441	28.9917	31.5758	31.7583	30.7384	31.8739	32.5424	32.4207
1164	20	20	69.1	48.442	0	323.31	110720000000	724	P22695	P22695	Cytochrome b-c1 complex subunit 2, mitochondrial	UQCRC2	Known	+	-0.109554	1.64616		0.597388	-0.206566	-0.292188	2.81141		0.0983801	-0.543068	0.312159	1.19121		0.18164	0.500909	32.5287	32.5897	32.4879	32.4329	32.4324	32.4123	32.2395	32.2863	32.2038	32.3423	32.5284	32.1622	32.58	32.7819	32.6074
3937	19	19	60.3	49.148	0	170.36	8672900000	207	Q9BQ95;Q9BQ95-4;Q9BQ95-2;Q9BQ95-3	Q9BQ95;Q9BQ95-4;Q9BQ95-2	Evolutionarily conserved signaling intermediate in Toll pathway, mitochondrial	ECSIT	Known	+	-0.109345	0.300453		0.675938	-0.168777	0.0341009	0.060099		0.89604	0.0489483	0.0394707	0.0642717		0.875671	0.0553056	28.5906	28.8525	28.373	28.5728	28.3982	28.517	28.5536	28.4524	28.9123	29.0431	29.333	28.8038	28.8213	29.1452	29.3319
1951	5	5	71.3	11.951	0	46.53	2652200000	53	P62942	P62942	Peptidyl-prolyl cis-trans isomerase FKBP1A	FKBP1A			-0.109102	0.220026		0.700731	-0.157378	-0.319653	0.669006		0.163084	-0.44598	NaN	NaN		NaN	NaN	26.1234	25.4585	25.7268	25.655	25.6742	25.6522	25.5855	25.2586	25.5057	NaN	NaN	NaN	NaN	NaN	NaN
1976	10	10	80.4	18.007	0	58.54	5327100000	85	P63279	P63279	SUMO-conjugating enzyme UBC9	UBE2I			-0.108721	0.284469		0.682509	-0.166211	0.144168	1.49195		0.414653	0.264653	0.963479	0.919841	+	0.0503318	0.973941	28.1008	28.0306	28.0081	27.6724	27.9436	28.1973	28.1295	28.2506	28.1919	28.1726	27.9041	28.1883	28.528	30.0114	28.6159
1275	11	11	53.6	28.993	0	94.332	16395000000	278	P30040;P30040-2	P30040	Endoplasmic reticulum resident protein 29	ERP29			-0.108468	0.484889		0.651821	-0.181595	0.0262489	0.112263		0.905812	0.0448899	0.442947	1.72458		0.0759046	0.718955	29.8571	29.786	29.661	29.5698	29.5927	29.8163	29.695	29.9095	29.7784	29.4016	29.2417	29.4353	29.6502	29.9897	29.7675
3605	30	30	40	110.5	0	106.09	2737300000	130	Q96A65;Q96A65-2	Q96A65	Exocyst complex component 4	EXOC4			-0.108358	0.246676		0.695934	-0.160829	-0.196346	0.575321		0.350974	-0.301171	0.0398528	0.0780681		0.869366	0.0586214	26.1648	26.2646	26.1304	25.7937	26.0623	26.3786	25.8	26.2784	25.8924	28.6387	28.7462	28.8427	28.5959	28.6296	29.1216
521	10	10	28	39.641	0	45.439	3720400000	105	O75695	O75695	Protein XRP2	RP2			-0.108065	0.243116		0.695573	-0.159983	0.210026	1.58197		0.234269	0.374397	0.268688	1.04218		0.248187	0.432598	27.5616	27.5003	27.4574	27.1858	27.2686	27.7408	27.7327	27.799	27.6177	27.9365	27.8833	27.8709	27.9334	28.3302	28.2331
255	4	4	38.4	15.173	0	30.864	5007800000	68	O15235	O15235	28S ribosomal protein S12, mitochondrial	MRPS12	Known	+	-0.107811	1.13819		0.617205	-0.197983	-0.227898	3.77471		0.166954	-0.441043	-0.290374	0.776249		0.248633	-0.43185	28.2863	28.3229	28.3002	28.279	28.1347	28.1722	28.097	28.0763	28.0524	27.2191	27.2749	27.2984	27.2692	26.6776	26.9744
3367	8	8	44	25.431	0	28.801	2761600000	73	Q8TAA5;Q8TAA5-2	Q8TAA5	GrpE protein homolog 2, mitochondrial	GRPEL2	Known	+	-0.107698	1.30273		0.612734	-0.199908	0.0860977	0.589163		0.662	0.152315	0.54211	1.4021		0.0635086	0.796977	27.214	27.2517	27.3138	27.1264	27.1267	27.2033	27.2654	27.3128	27.4595	26.4385	25.9551	25.9701	26.5129	26.6685	26.8087
786	11	11	11.7	155.14	0	24.175	679390000	33	P06213-2;P06213	P06213-2;P06213	Insulin receptor;Insulin receptor subunit alpha;Insulin receptor subunit beta	INSR			-0.107562	0.175432		0.720835	-0.146842	0.114824	0.329405		0.598193	0.178443	NaN	NaN		NaN	NaN	25.4245	25.5148	25.049	24.9316	25.1722	25.5619	25.4302	25.4757	25.4268	NaN	NaN	NaN	NaN	NaN	NaN
1081	35	35	80.6	60.343	0	323.31	37940000000	582	P17987	P17987	T-complex protein 1 subunit alpha	TCP1			-0.10751	0.21199		0.70796	-0.154307	-0.311415	1.34804		0.116343	-0.512186	0.452755	2.15197		0.0652539	0.768676	30.1987	30.0756	30.0422	29.6447	30.0495	30.2999	29.6486	29.9779	29.7559	32.2961	32.3525	32.3942	32.647	32.9378	32.8162
3558	38	38	44.1	123.03	0	175.57	4009800000	203	Q92900-2;Q92900	Q92900-2;Q92900	Regulator of nonsense transcripts 1	UPF1			-0.107309	0.478387		0.658203	-0.179631	-0.851721	2.15156	+	0.0157124	-1.27602	0.304394	0.925677		0.212772	0.465679	27.5263	27.3441	27.2968	27.1463	27.3507	27.3484	26.6662	26.2342	26.7117	28.624	28.8422	29.1526	29.1775	29.1608	29.1937
3669	5	5	13.2	64.18	0	13.075	193760000	15	Q96DX4;Q96DX4-2	Q96DX4	RING finger and SPRY domain-containing protein 1	RSPRY1			-0.107129	0.224081		0.708598	-0.157149	-0.0224447	0.0459915		0.925091	-0.034155	NaN	NaN		NaN	NaN	23.4334	NaN	23.4239	23.1059	23.5859	23.2726	23.2491	23.5632	NaN	NaN	NaN	NaN	NaN	NaN	NaN
3017	15	4	7	227.87	0	7.9493	3527400000	38	Q7Z406;Q7Z406-6;Q7Z406-2;Q7Z406-5;Q7Z406-4	Q7Z406;Q7Z406-6;Q7Z406-2;Q7Z406-5;Q7Z406-4	Myosin-14	MYH14			-0.106818	0.253506		0.695705	-0.160082	-0.0201829	0.0523106		0.925496	-0.0318969	NaN	NaN		NaN	NaN	27.521	27.1958	27.5782	27.1053	27.3622	27.5071	27.3718	27.527	27.3357	NaN	NaN	NaN	NaN	NaN	NaN
4193	29	29	61.7	71.026	0	143.06	11024000000	273	Q9H0H5	Q9H0H5	Rac GTPase-activating protein 1	RACGAP1			-0.106794	0.321111		0.679614	-0.167811	-0.628001	3.14575	+	0.0269908	-1.10791	0.182981	0.380458		0.474862	0.260625	29.4188	29.41	29.3139	29.0097	29.4098	29.4027	28.7052	28.8679	28.6856	28.6316	29.3028	29.0294	29.2381	29.065	29.2096
3888	4	4	22.8	28.998	0	15.722	522900000	15	Q99618	Q99618	Cell division cycle-associated protein 3	CDCA3			-0.106694	0.432482		0.664968	-0.176183	-0.213743	1.61131		0.226227	-0.38118	NaN	NaN		NaN	NaN	25.0841	25.1937	25.1502	24.9106	24.9623	25.2351	25.0322	24.8817	24.8728	NaN	NaN	NaN	NaN	NaN	NaN
503	16	16	56	39.609	0	239.59	23986000000	320	O75521-2;O75521	O75521-2;O75521	Enoyl-CoA delta isomerase 2, mitochondrial	ECI2	Known	+	-0.106677	1.51254		0.611856	-0.200294	0.277825	3.67283		0.103706	0.532594	0.347288	1.8675		0.121085	0.596246	30.4006	30.354	30.4221	30.235	30.3185	30.3032	30.6559	30.6837	30.6705	28.5579	28.703	28.6562	28.8623	29.1065	28.9902
3341	9	9	15.7	59.151	0	27.342	2273600000	75	Q8NF37	Q8NF37	Lysophosphatidylcholine acyltransferase 1	LPCAT1			-0.106274	0.31704		0.681522	-0.166775	0.111429	0.367803		0.599245	0.177809	NaN	NaN		NaN	NaN	27.3151	27.1894	26.9151	27.1261	26.8966	27.0782	27.1743	27.3329	27.2468	NaN	NaN	NaN	NaN	NaN	NaN
4576	6	6	51.6	17.316	0	72.588	9272700000	115	Q9NX14;Q9NX14-2	Q9NX14;Q9NX14-2	NADH dehydrogenase [ubiquinone] 1 beta subcomplex subunit 11, mitochondrial	NDUFB11	Known	+	-0.105505	0.376782		0.672973	-0.17086	-0.135368	0.188454		0.604717	-0.174742	0.0251058	0.166799		0.900816	0.0450933	28.707	28.5851	28.9025	28.5603	28.547	28.7709	28.1089	28.6895	28.9901	29.3304	29.4181	29.4331	29.511	29.3886	29.3574
1205	12	12	67.7	29.555	0	171.21	2951600000	120	P25786;P25786-2	P25786;P25786-2	Proteasome subunit alpha type-1	PSMA1			-0.105438	0.416726		0.667092	-0.1735	-0.124176	0.573582		0.528698	-0.208228	0.570574	1.34585		0.0602988	0.817157	26.4298	26.3451	26.158	26.1316	26.3491	26.1359	26.1764	26.1002	26.2837	28.5435	29.0143	28.439	29.0577	29.3343	29.3166
668	5	5	43.8	20.189	0	39.074	1471600000	47	O95816-2;O95816	O95816-2;O95816	BAG family molecular chaperone regulator 2	BAG2	Predicted		-0.105436	0.716325		0.644251	-0.185862	-0.488121	1.49673	+	0.0443288	-0.749865	-0.162285	0.121533		0.646615	-0.166181	26.4173	26.4212	26.5044	26.2282	26.3617	26.4367	25.8354	26.2548	25.7884	25.5562	26.7505	25.7778	NaN	25.9381	25.7937
2409	13	13	26.1	76.861	0	122.37	3864300000	82	Q14444-2;Q14444	Q14444-2;Q14444	Caprin-1	CAPRIN1			-0.105393	0.654661		0.647106	-0.183983	-0.534983	2.53816	+	0.0270208	-0.918657	0.326874	0.45849		0.277368	0.404708	27.2113	27.1259	27.0662	26.9256	27.1315	27.0301	26.6157	26.7131	26.4696	28.4978	28.8806	29.2217	28.7765	29.2524	29.5518
5094	9	9	21.8	66.591	0	36.501	634740000	32	Q9Y5X1	Q9Y5X1	Sorting nexin-9	SNX9			-0.105212	0.204685		0.717516	-0.151742	-0.109933	0.264195		0.647766	-0.168654	0.283278	0.490523		0.310792	0.376894	NaN	24.7449	25.0421	24.5435	24.894	24.9274	24.8146	24.7526	NaN	25.9192	26.1497	25.6914	25.7943	26.2989	26.517
1382	22	22	16.4	212.57	0	64.469	1795400000	94	P35658-2;P35658-4;P35658;P35658-3;P35658-5	P35658-2;P35658-4;P35658;P35658-3;P35658-5	Nuclear pore complex protein Nup214	NUP214			-0.104858	0.558703		0.657902	-0.179786	0.568116	2.90648	+	0.0236456	0.997031	0.393838	0.92483		0.137197	0.563448	26.2189	26.2176	26.1234	25.9284	26.1466	26.1704	26.6585	26.8713	26.7346	26.9434	26.6306	26.7687	26.8232	27.3892	27.3119
1967	6	6	50	8.2178	0	17.472	4363400000	100	P63173	P63173	60S ribosomal protein L38	RPL38			-0.103146	0.220508		0.713659	-0.151163	-1.13584	2.04385	+	0.00850633	-1.65189	0.466198	3.65447		0.0530613	0.868612	26.58	26.5419	26.3971	26.0567	26.596	26.5569	25.138	25.6029	NaN	29.3887	29.4063	29.4243	29.8039	29.8934	29.9206
2101	18	18	48.3	32.728	0	158.26	38692000000	333	Q02878	Q02878	60S ribosomal protein L6	RPL6	Predicted		-0.103141	0.255341		0.703012	-0.156154	-0.335859	1.96289		0.0826338	-0.584332	0.475204	1.46271		0.074044	0.73021	30.2929	30.5252	30.3446	30.0468	30.2616	30.5449	30.0078	30.0951	30.0522	32.1804	32.1315	32.1744	32.3629	32.8794	32.6697
3074	16	16	23.8	107.61	0	52.983	2574100000	96	Q86UT6;Q86UT6-2	Q86UT6;Q86UT6-2	NLR family member X1	NLRX1	Known	+	-0.102467	0.164197		0.737924	-0.139432	1.02046	3.59567	+	0.00936	1.74978	-0.0945543	0.051732		0.812799	-0.0837842	26.6252	26.7646	26.8878	26.9041	26.8529	26.2131	27.712	27.8053	27.8216	25.5187	26.2252	26.0317	26.9832	25.0185	25.4902
3371	10	10	55.4	25.384	0	76.558	9839900000	203	Q8TAE8	Q8TAE8	Growth arrest and DNA damage-inducible proteins-interacting protein 1	GADD45GIP1	Known	+	-0.102341	1.15842		0.638034	-0.188981	-0.160437	2.15643		0.350225	-0.301886	0.128782	0.561499		0.550606	0.214	29.2078	29.1387	29.1245	29.1097	28.9968	29.0575	29.0219	28.9616	29.0062	28.3869	28.3446	28.6322	28.4908	28.6528	28.6065
1143	20	20	79.9	30.772	0	323.31	294420000000	2144	P21796	P21796	Voltage-dependent anion-selective channel protein 1	VDAC1	Known	+	-0.102211	1.77347		0.627268	-0.194358	0.187827	2.16053		0.268525	0.349953	-0.171511	1.4507		0.40077	-0.309075	33.5881	33.6381	33.6059	33.5333	33.466	33.5262	33.7877	33.8615	33.7464	33.8399	33.8859	33.7442	33.5971	33.7189	33.6395
1204	33	33	62	59.75	0	323.31	676140000000	2631	P25705;P25705-2;P25705-3	P25705;P25705-2;P25705-3	ATP synthase subunit alpha, mitochondrial	ATP5A1	Known	+	-0.101906	1.38		0.63421	-0.190669	0.0560799	0.860598		0.767377	0.105751	0.218547	2.07815		0.281686	0.400942	35.1122	35.0439	35.0197	34.9429	34.9301	34.9971	35.1213	35.0908	35.1319	34.8094	34.7522	34.7854	34.919	35.0263	35.0573
2451	5	5	4	191.16	0	11.043	563530000	11	Q14999;Q14999-2	Q14999;Q14999-2	Cullin-7	CUL7			-0.101388	0.129		0.753958	-0.128579	-0.042394	0.106089		0.863813	-0.065817	NaN	NaN		NaN	NaN	25.1427	25.2754	25.0203	24.5841	25.0026	25.5477	24.9031	25.3299	25.0783	NaN	NaN	NaN	NaN	NaN	NaN
4577	7	7	50.6	19.599	0	35.204	1699000000	64	Q9NX18	Q9NX18	Succinate dehydrogenase assembly factor 2, mitochondrial	SDHAF2	Known	+	-0.10115	0.273452		0.703157	-0.156011	0.34035	1.24077		0.0995742	0.541262	NaN	NaN		NaN	NaN	26.6882	26.7353	26.3758	26.3415	26.4805	26.6738	26.9457	27.0449	26.8297	NaN	NaN	NaN	NaN	NaN	NaN
913	27	27	54.9	68.996	0	239.69	70164000000	606	P10515	P10515	Dihydrolipoyllysine-residue acetyltransferase component of pyruvate dehydrogenase complex, mitochondrial	DLAT	Known	+	-0.100834	3.72504		0.616252	-0.198641	0.257051	3.68199		0.124405	0.494405	-0.0486361	0.376246		0.804162	-0.0877546	31.8208	31.8161	31.8225	31.7064	31.7319	31.7186	32.0943	32.099	32.0373	31.3115	31.4061	31.3136	31.2142	31.3671	31.304
1079	5	5	22.4	26.152	0	15.606	3124700000	70	P17931	P17931	Galectin-3	LGALS3			-0.100156	0.168135		0.740492	-0.138183	1.80578	6.13712	+	0	3.38327	-0.907462	0.540902		0.07397	-0.753694	26.5224	26.4248	26.4985	26.8233	26.1084	26.2134	28.2893	28.3155	28.2581	26.6388	28.1686	26.552	25.9568	26.4679	NaN
5027	4	4	31.7	15.85	0	43.93	2824700000	48	Q9Y3D5	Q9Y3D5	28S ribosomal protein S18c, mitochondrial	MRPS18C	Known	+	-0.100099	0.910696		0.651119	-0.181566	-0.344198	2.5459		0.0708549	-0.622723	NaN	NaN		NaN	NaN	27.2499	27.2557	27.1182	27.1363	27.1288	27.0583	26.8126	26.9076	26.8709	NaN	NaN	NaN	NaN	NaN	NaN
1360	38	21	58.7	68.563	0	143.62	13519000000	285	P35241;P35241-5;P35241-4;P35241-2;P35241-3	P35241;P35241-5;P35241-4	Radixin	RDX			-0.099727	0.162003		0.741381	-0.136358	-0.148036	0.350467		0.500955	-0.219182	0.220692	1.25121		0.30912	0.378674	29.4289	29.1944	29.162	28.8473	29.0644	29.5745	29.1791	29.3416	28.8205	29.9122	30.1281	30.007	30.1592	30.3412	30.2089
4494	44	44	54.2	113.79	0	323.31	81042000000	1104	Q9NSE4	Q9NSE4	Isoleucine--tRNA ligase, mitochondrial	IARS2	Known	+	-0.0994123	1.79226		0.637246	-0.189409	0.0204067	0.241406		0.914859	0.038262	0.130661	2.59452		0.489668	0.25155	31.9011	31.8529	31.9161	31.7953	31.8156	31.7609	31.952	31.8588	31.9205	32.3849	32.4026	32.3494	32.4901	32.5299	32.5088
1719	2	2	16.1	20.324	0	15.924	1564300000	46	P53801	P53801	Pituitary tumor-transforming gene 1 protein-interacting protein	PTTG1IP			-0.0993729	0.640739		0.664729	-0.17434	-0.304649	1.16424		0.12769	-0.500034	NaN	NaN		NaN	NaN	26.6793	26.6548	26.7968	26.5131	26.6179	26.7018	26.2803	26.5311	NaN	NaN	NaN	NaN	NaN	NaN	NaN
1414	16	16	59.2	27.843	0	120.35	66599000000	546	P38117;P38117-2	P38117;P38117-2	Electron transfer flavoprotein subunit beta	ETFB	Known	+	-0.0993423	1.72432		0.638247	-0.188848	0.38313	3.88376	+	0.0487214	0.727859	-0.595451	2.16899	+	0.0515794	-0.966994	31.7879	31.7686	31.838	31.6715	31.7263	31.6987	32.2136	32.1603	32.17	30.3347	30.3299	30.0911	29.4912	29.757	29.7212
3539	10	10	35.2	44.971	0	31.413	618080000	30	Q92783-2;Q92783;O75886;O75886-2	Q92783-2;Q92783	Signal transducing adapter molecule 1	STAM			-0.0989609	0.730504		0.665104	-0.17607	-0.379783	2.53159		0.0578694	-0.67976	NaN	NaN		NaN	NaN	24.272	24.3433	24.428	24.2791	24.1646	24.3026	23.8999	23.9744	24.0296	NaN	NaN	NaN	NaN	NaN	NaN
619	5	3	27.6	28.981	0	18.607	631620000	28	O95297-2;O95297;O95297-4	O95297-2;O95297;O95297-4	Myelin protein zero-like protein 1	MPZL1			-0.0987603	0.219209		0.725308	-0.147228	-0.781033	1.51388	+	0.0247559	-1.22051	NaN	NaN		NaN	NaN	24.9497	25.1822	NaN	25.0653	24.7399	25.0964	24.3628	NaN	24.2071	25.7277	26.0272	25.9622	NaN	25.8818	NaN
3177	29	29	46.8	87.99	0	148.14	16618000000	367	Q8IYB8	Q8IYB8	ATP-dependent RNA helicase SUPV3L1, mitochondrial	SUPV3L1	Known	+	-0.0985514	2.53542		0.633486	-0.191289	0.02981	0.546262		0.882023	0.0568752	-0.106835	0.677153		0.598741	-0.186883	29.7476	29.796	29.7657	29.675	29.6785	29.6602	29.7802	29.8387	29.7799	29.4171	29.3165	29.2985	29.1152	29.3105	29.286
723	2	2	1.7	160.61	0.00023889	5.3903	159450000	21	P02462;P29400;P29400-2	P02462;P29400;P29400-2	Collagen alpha-1(IV) chain;Arresten;Collagen alpha-5(IV) chain	COL4A1;COL4A5			-0.0985285	0.387064		0.692226	-0.162261	-0.406972	1.82252		0.0580405	-0.678685	NaN	NaN		NaN	NaN	23.4355	23.5261	23.4676	23.5718	23.3456	23.2162	22.9711	23.2615	22.9757	NaN	NaN	NaN	NaN	NaN	NaN
3631	8	8	36.5	30.834	0	15.735	579550000	23	Q96BQ5	Q96BQ5	Coiled-coil domain-containing protein 127	CCDC127	Known	+	-0.0982571	0.413284		0.688808	-0.163464	0.19079	0.931239		0.316476	0.320242	NaN	NaN		NaN	NaN	24.9983	24.7168	25.0026	24.8003	24.7497	24.8729	25.0736	25.1252	25.0911	NaN	NaN	NaN	NaN	NaN	NaN
4823	20	20	66.9	38.534	0	323.31	59758000000	726	Q9UJZ1;Q9UJZ1-2	Q9UJZ1;Q9UJZ1-2	Stomatin-like protein 2, mitochondrial	STOML2	Known	+	-0.0982164	0.938886		0.659371	-0.178926	-0.0136623	0.0965991		0.945069	-0.0248128	0.0462837	0.239115		0.819827	0.080319	31.5339	31.5808	31.4201	31.4345	31.3989	31.4067	31.4977	31.5273	31.4687	31.7474	31.9216	31.836	31.7669	31.9321	31.9448
4984	13	13	54.1	28.134	0	120.75	27125000000	301	Q9Y2R9	Q9Y2R9	28S ribosomal protein S7, mitochondrial	MRPS7	Known	+	-0.097496	1.03429		0.65879	-0.179132	-0.401383	2.77476	+	0.0495577	-0.725272	-0.1087	0.639346		0.595	-0.188483	30.5529	30.6875	30.6393	30.523	30.5668	30.4975	30.2298	30.2853	30.1605	29.9934	30.1709	30.2463	29.9989	30.055	30.0306
915	8	8	65.7	11.737	0	30.597	7800600000	96	P10599;P10599-2	P10599;P10599-2	Thioredoxin	TXN			-0.0973892	0.218195		0.724812	-0.144545	-0.622113	1.7414	+	0.0250549	-0.940962	0.491685	0.622323		0.131159	0.574872	28.719	28.492	28.6588	28.2115	28.7341	28.6321	28.1953	27.7149	28.0933	29.0448	28.3617	29.0917	28.8374	29.752	29.3838
1419	31	31	66.6	68.303	0	323.31	17163000000	401	P38606;P38606-2	P38606;P38606-2	V-type proton ATPase catalytic subunit A	ATP6V1A	Predicted		-0.0971699	0.585231		0.675046	-0.16926	-0.349775	1.90457		0.0766191	-0.602038	0.0969493	0.49394		0.640463	0.165556	29.4541	29.6029	29.6713	29.5528	29.4355	29.4484	29.1426	29.3138	29.2224	30.6395	30.5659	30.5161	30.5171	30.768	30.7272
2253	10	10	36.2	44.739	0	122.54	1568900000	57	Q13148;Q13148-4	Q13148;Q13148-4	TAR DNA-binding protein 43	TARDBP			-0.0969601	0.672836		0.671229	-0.171485	-0.316425	1.25456		0.116585	-0.511692	0.811286	2.81882	+	0.0418644	1.34069	25.4145	25.5628	25.3625	25.3508	25.304	25.3942	24.9603	25.1172	25.3131	27.7886	27.7607	27.4866	28.4068	28.5425	28.5206
1016	29	29	65.9	57.136	0	139.1	8584000000	257	P14868;P14868-2	P14868;P14868-2	Aspartate--tRNA ligase, cytoplasmic	DARS			-0.096536	0.295303		0.711401	-0.152625	-0.0589142	0.285466		0.779918	-0.101009	0.423734	2.2624		0.0732305	0.733628	28.0565	28.0411	28.0793	27.6984	28.0912	28.0977	27.8491	28.1333	28.0177	30.1505	30.0487	30.1008	30.3806	30.5848	30.6058
277	10	10	25.7	60.632	0	37.636	1432800000	29	O15460-2;O15460	O15460-2;O15460	Prolyl 4-hydroxylase subunit alpha-2	P4HA2			-0.0959619	0.659688		0.674353	-0.16958	0.63146	2.47711	+	0.0250264	1.05074	NaN	NaN		NaN	NaN	26.329	26.2919	26.2611	26.255	26.0725	26.2668	27.0021	27.0454	26.729	NaN	NaN	NaN	NaN	NaN	NaN
4487	7	7	77.5	15.521	0	254.9	40895000000	400	Q9NS69	Q9NS69	Mitochondrial import receptor subunit TOM22 homolog	TOMM22	Known	+	-0.095644	0.371412		0.700336	-0.157353	-0.100358	0.42132		0.62518	-0.166828	0.0104605	0.0711298		0.951666	0.0189678	31.2008	31.1053	30.8641	31.0405	30.9272	30.9156	30.9859	30.9546	30.9286	30.722	30.6509	30.7216	30.6545	30.7996	30.6719
2194	31	31	65.5	58.252	0	323.31	61839000000	814	Q10713;Q10713-2	Q10713;Q10713-2	Mitochondrial-processing peptidase subunit alpha	PMPCA	Known	+	-0.0956224	1.24752		0.659618	-0.178404	0.442687	3.50725	+	0.0326598	0.822808	0.20562	0.999721		0.349967	0.344724	31.45	31.488	31.5702	31.4025	31.3996	31.4192	31.9524	31.9648	31.919	31.4275	31.3163	31.2641	31.6883	31.5376	31.3988
540	3	3	11.1	55.278	0.00023386	4.9924	82163000	5	O75907	O75907	Diacylglycerol O-acyltransferase 1	DGAT1			-0.0949243	0.161394		0.748487	-0.131664	-0.174678	0.448285		0.421448	-0.261641	NaN	NaN		NaN	NaN	22.1854	21.6287	21.9282	21.5323	21.8782	22.047	21.7636	21.8063	21.6483	NaN	NaN	NaN	NaN	NaN	NaN
4730	13	13	44.7	40.513	0	64.56	5855900000	129	Q9UBS4	Q9UBS4	DnaJ homolog subfamily B member 11	DNAJB11			-0.0939159	0.20808		0.737871	-0.139202	0.196592	0.779797		0.318608	0.31902	0.163537	0.467513		0.489753	0.251062	28.5658	28.2756	28.2732	28.0444	28.2444	28.544	28.4916	28.6949	28.5179	27.1205	27.3552	27.0394	27.1041	27.493	27.4086
197	3	3	4.9	103.13	0	21.457	467830000	12	O14786;O14786-3;O14786-2	O14786;O14786-3;O14786-2	Neuropilin-1	NRP1			-0.0938759	0.242857		0.725943	-0.143853	-0.297188	2.32472		0.100641	-0.538093	NaN	NaN		NaN	NaN	25.0512	25.0441	24.9253	24.7707	24.7613	25.207	24.7615	24.7182	24.6493	NaN	NaN	NaN	NaN	NaN	NaN
1337	32	32	28.7	171.59	0	189.06	3241800000	154	P33527;P33527-4;P33527-9;P33527-2;P33527-3;P33527-6;P33527-7;P33527-5;P33527-8;O15438-2;O15438;O15438-4	P33527;P33527-4;P33527-9;P33527-2;P33527-3;P33527-6;P33527-7;P33527-5;P33527-8	Multidrug resistance-associated protein 1	ABCC1			-0.0935828	0.175904		0.748249	-0.133346	-0.00574811	0.0136855		0.976384	-0.00899653	0.637767	2.25047	+	0.0494395	1.03254	27.2421	27.0142	27.0149	26.7056	27.3456	26.9392	27.1084	27.2733	26.8722	28.0644	28.1943	28.3452	28.7498	29.0094	28.7579
3597	15	15	55	49.846	0	117.16	5441400000	133	Q969Y2-3;Q969Y2;Q969Y2-4;Q969Y2-2	Q969Y2-3;Q969Y2;Q969Y2-4;Q969Y2-2	tRNA modification GTPase GTPBP3, mitochondrial	GTPBP3	Known	+	-0.0935211	0.867828		0.67338	-0.169996	-0.218045	1.89878		0.210392	-0.395953	-0.0735537	0.165194		0.755369	-0.110159	28.3589	28.403	28.5141	28.3207	28.3048	28.3699	28.2488	28.1915	28.1816	26.7919	26.7314	26.5647	26.8647	26.3385	26.6642
754	19	19	78.2	36.053	0	323.31	427020000000	2034	P04406;P04406-2;O14556	P04406;P04406-2	Glyceraldehyde-3-phosphate dehydrogenase	GAPDH	Predicted	+	-0.0926196	0.207868		0.740072	-0.137741	-0.39962	1.9869		0.0578574	-0.680139	0.338665	1.4453		0.142072	0.5562	33.8348	33.8552	33.7517	33.3911	33.8199	33.9528	33.3162	33.5764	33.3503	35.3648	35.5034	35.4851	35.6524	35.9839	35.733
3214	20	20	44.3	63.472	0	176	4259900000	167	Q8N1G4	Q8N1G4	Leucine-rich repeat-containing protein 47	LRRC47			-0.0925268	0.223406		0.737495	-0.139827	-0.167454	1.05915		0.366986	-0.291582	0.653046	1.73542	+	0.0505714	0.974887	27.5645	27.4872	27.4432	27.0902	27.5626	27.5646	27.2042	27.3669	27.4216	28.6972	28.6249	28.8219	29.0481	29.5247	29.5303
484	21	21	57.3	51.712	0	316.6	270970000000	1522	O75390	O75390	Citrate synthase, mitochondrial	CS	Known	+	-0.0915286	1.92207		0.665801	-0.175698	0.0315819	0.675604		0.873729	0.0605912	-0.00999451	0.17364		0.951445	-0.0191539	33.7827	33.7792	33.8417	33.7178	33.7113	33.6999	33.8452	33.8249	33.8283	33.3542	33.358	33.3113	33.3501	33.2997	33.3436
3070	6	6	7.9	97.805	0	11.693	217010000	13	Q86UK7-2;Q86UK7-3;Q86UK7	Q86UK7-2;Q86UK7-3;Q86UK7	Zinc finger protein 598	ZNF598			-0.0904894	0.657233		0.698967	-0.161996	-0.244295	1.41598		0.185026	-0.420952	NaN	NaN		NaN	NaN	23.4441	23.5523	23.4634	23.4495	NaN	23.3427	23.1397	23.3838	23.2033	NaN	NaN	NaN	NaN	NaN	NaN
191	14	14	32.7	72.683	0	52.453	2771900000	76	O14744;O14744-5;O14744-2;O14744-3;O14744-4	O14744;O14744-5;O14744-2;O14744-3;O14744-4	Protein arginine N-methyltransferase 5;Protein arginine N-methyltransferase 5, N-terminally processed	PRMT5			-0.0903721	0.191725		0.748483	-0.132781	0.172761	0.469369		0.420854	0.262007	0.593895	1.71724		0.0524405	0.90468	26.9627	26.6546	26.7171	26.3798	26.8566	26.8268	26.9099	27.1914	26.7514	27.7359	27.621	27.9587	28.2581	28.6074	28.2318
4887	6	6	51.7	18.856	0	44.896	5804200000	73	Q9UMX5	Q9UMX5	Neudesin	NENF			-0.0900046	0.351966		0.717137	-0.14846	0.127579	0.809538		0.49303	0.222687	-0.0216707	0.047545		0.924564	-0.033029	28.21	28.0843	28.0415	27.9005	27.9597	28.2057	28.1367	28.2726	28.3093	27.6521	27.2287	27.4306	27.2937	27.6073	27.3453
1708	52	52	57.3	119.77	0	323.31	14304000000	507	P53396-2;P53396;P53396-3	P53396-2;P53396;P53396-3	ATP-citrate synthase	ACLY	Known	+	-0.0894826	0.189276		0.747651	-0.131424	-0.334131	1.29212		0.100751	-0.537863	0.0421041	0.143789		0.845077	0.0691746	29.1663	29.0954	29.0138	28.6515	29.1809	29.1746	28.6056	28.9784	28.6891	30.9505	30.9113	30.9355	30.7713	31.1398	31.0125
4617	22	22	41.4	81.462	0	165.27	13530000000	319	Q9NYY8;Q9NYY8-2	Q9NYY8;Q9NYY8-2	FAST kinase domain-containing protein 2	FASTKD2	Known	+	-0.0894305	0.718333		0.694768	-0.160579	0.102556	0.873561		0.582612	0.184903	0.182412	0.841776		0.408031	0.303724	29.4368	29.414	29.4364	29.2944	29.2727	29.4518	29.6398	29.4816	29.4735	29.1822	29.4114	29.2318	29.3375	29.4468	29.5883
4515	18	18	43.3	59.58	0	96.778	5353700000	133	Q9NUL7	Q9NUL7	Probable ATP-dependent RNA helicase DDX28	DDX28	Known	+	-0.0892359	0.655204		0.698348	-0.158887	-0.0673173	0.479999		0.732942	-0.120013	0.130994	0.996719		0.515417	0.233235	28.2627	28.2413	28.1532	28.0839	28.0725	28.2331	28.2351	28.0595	28.1606	27.6283	27.4852	27.4502	27.6141	27.7087	27.6338
2863	27	27	69	53.354	0	238.62	21837000000	343	Q6NUK1;Q6NUK1-2	Q6NUK1;Q6NUK1-2	Calcium-binding mitochondrial carrier protein SCaMC-1	SLC25A24	Known	+	-0.0889829	1.03075		0.686375	-0.164619	-0.13241	1.80321		0.443998	-0.248492	-0.0136738	0.198638		0.937318	-0.0259716	29.9073	29.9048	29.9868	29.8229	29.9037	29.8053	29.7739	29.7909	29.8369	30.9539	30.9014	30.9678	30.9262	30.9575	30.8983
4578	11	11	53.4	28.449	0	123.07	12322000000	212	Q9NX20	Q9NX20	39S ribosomal protein L16, mitochondrial	MRPL16	Known	+	-0.0886847	0.739684		0.69585	-0.159795	-0.243327	1.61242		0.178266	-0.427571	0.07245	0.236114		0.741494	0.116728	29.35	29.3778	29.4872	29.3491	29.3547	29.2451	29.1873	29.2414	29.0563	28.9612	29.356	29.1542	29.3067	29.1754	29.2067
[truncated: 3,375 more rows]

## Sheet: Tim8b HEK293
Peptides	Unique peptides	Sequence coverage [%]	Mol. weight [kDa]	Q-value	Score	Intensity	MS/MS count	Protein IDs	Majority protein IDs	Protein names	Gene names	IMPI mito. Category	MCARTA2_LIST	Diff. Log2 TIMM8BKO/HEK293T-CONTROL	-Log10 p-value	p-value<0.05	Test statistic	Log2 LFQ01-HEK293T-CONTROL	Log2 LFQ02-HEK293T-CONTROL	Log2 LFQ03-HEK293T-CONTROL	Log2 LFQ04-HEK293T-TIMM8B_KO	Log2 LFQ05-HEK293T-TIMM8B_KO	Log2 LFQ06-HEK293T-TIMM8B_KO
[truncated: 935 more rows]

[truncated: 1 more sheets: Tim8b SHSY5Y]
