# Supplementary material for: Function of hTim8a in complex IV assembly in neuronal cells provides insight into pathomechanism underlying Mohr-Tranebjærg syndrome
Source: eLife. 2019 Nov 4;8:e48828. doi: 10.7554/eLife.48828 (PMC6861005; doi:10.7554/eLife.48828)
Supplement: Figure 5—source data 1. [file elife-48828-fig5-data1.xlsx]

## Sheet: HEK293 Tim8a KO vs control
hTim8a KO
Negative fold change means: metabolite is lower in control cells than KO
BH-adjusted p Value < 0.05
Sorted from fold change
	t-statistic	p-value	BH Adjusted p-value	fold change	standard error
N-Acetylglutamine	-34.3503	1.35634e-10	2.7805e-08	-5.08517	0.148039
Octanoic acid	-6.55671	0.00032736	0.0167772	-0.38026	0.0579955
Fumaric acid	6.84756	0.000178822	0.0167772	0.372009	0.0543272
Malic acid	6.48465	0.000284181	0.0167772	0.395349	0.0609669
Palmitoleic acid	5.95764	0.000512544	0.0175119	0.303389	0.0509244
Galacturonic acid	5.64915	0.000492606	0.0175119	0.394675	0.0698644
Mannose	-5.37791	0.000843205	0.0209471	-0.357064	0.0663946
Caproic acid	-6.17458	0.00094942	0.0209471	-0.320664	0.051933
Glucaric acid	5.02679	0.000950481	0.0209471	0.362837	0.0721807
2 Hydroxybutyric acid	4.71569	0.00112399	0.0209471	0.384027	0.0814359
Lactic acid	5.13368	0.00109442	0.0209471	0.618121	0.120405
Glucuronic acid	4.98411	0.00147271	0.0232235	0.424974	0.0852658
Maleic acid	4.92098	0.00137531	0.0232235	0.602911	0.122518
Galactosamine	-5.57284	0.00178075	0.0252502	-0.784392	0.140753
Glucosamine	-5.26631	0.00197075	0.0252502	-0.611864	0.116185
Orotic acid	4.55957	0.00190931	0.0252502	0.450644	0.0988347
Glycerol-3-phosphate	-5.58434	0.00252055	0.0303949	-0.439499	0.0787021
O Phospho Serine	-5.21395	0.00273328	0.0311291	-0.348425	0.0668255
3 Phosphoglyceric acid	3.94771	0.00349044	0.03766	0.671033	0.169981
Maltose	-3.82643	0.00407721	0.0398013	-0.566866	0.148145
Norvaline	4.38212	0.00451351	0.0420577	0.471179	0.107523
Glucose	-4.15217	0.00544386	0.0447125	-0.274058	0.0660035
3 Hydroxy 3 methylglutaric acid	-3.7181	0.0054453	0.0447125	-0.242171	0.065133
N Acetylserine	3.67562	0.00561951	0.0447125	0.405687	0.110372
2 Phosphoglyceric acid	3.80112	0.00567085	0.0447125	0.531611	0.139856
Trehalose	-4.18361	0.00662529	0.0503031	-0.381856	0.0912744
3 Hydroxyisobutyric acid	3.53005	0.00748109	0.0528836	0.30571	0.0866021
Ribitol	3.95352	0.0073906	0.0528836	0.361189	0.0913588
Glycerol 2 phosphate	-3.40285	0.00851041	0.0556676	-0.252227	0.0741222
N Acetylaspartic acid	3.50983	0.00820897	0.0556676	0.528892	0.150689
Ureidosuccinic acid	4.65993	0.00868958	0.0556676	2.17526	0.466801
Fructose	-3.48811	0.010734	0.0655141	-0.35038	0.10045
Glyceraldehyde 3 phosphate	3.50318	0.0108658	0.0655141	0.518082	0.147889
Pyruvic acid	-3.14526	0.0118324	0.0673791	-0.956124	0.303989
3 Aminoglutaric acid	4.21518	0.0115517	0.0673791	0.824961	0.195712
Pantothenic acid	-3.43224	0.0124754	0.0691207	-0.165899	0.0483354
Glutaric acid	3.0823	0.0141788	0.0764909	0.225497	0.0731588
Decanoic acid	-3.00438	0.0151521	0.0796455	-0.254849	0.0848259
Lactitol	-3.40995	0.0173537	0.0889377	-0.694018	0.203527
Erythrose 4 phosphate	-2.85962	0.0196537	0.0982687	-0.164216	0.057426
Dihydroxyacetone phosphate	2.79468	0.0209228	0.102123	0.242753	0.0868627
Citric acid	2.79257	0.0225275	0.107399	0.15668	0.0561059
Nonanoic acid	-3.2953	0.0231661	0.107933	-0.371711	0.1128
Arachidonic acid	-2.92113	0.0238295	0.108557	-0.128727	0.0440678
Fructose 1 phosphate	-2.78564	0.0244271	0.10886	-0.180207	0.0646912
Myristic acid	2.84593	0.0264185	0.11523	0.154348	0.0542346
Glycyl Glycine	2.76367	0.0275947	0.117852	0.323889	0.117195
Triethanolamine	-3.22855	0.029079	0.121657	-0.242706	0.0751748
2 Hydroxyglutaric acid	2.75067	0.029945	0.122775	0.159626	0.0580318
Asparagine	2.57302	0.0343751	0.138174	0.198829	0.0772747
Fructose 1 phosphate	-2.5979	0.0361648	0.142573	-0.151529	0.0583275
Mannitol	-2.54631	0.0396409	0.153328	-0.358456	0.140774
2 Deoxy glucose	2.70615	0.0419265	0.159166	0.378173	0.139746
Adenosine	-2.30887	0.0465108	0.170263	-0.612664	0.265352
Octadecanol	-2.52656	0.04584	0.170263	-0.123496	0.0488789
2-Ketobutyric acid	-2.49284	0.0493745	0.172546	-0.400687	0.160735
3 4 Dihydroxybenzylamine	-2.30504	0.0495762	0.172546	-0.194079	0.0841977
Elaidic acid	2.33569	0.0496596	0.172546	0.125541	0.0537489
2-Aminoisobutyric acid	-2.37919	0.0535053	0.177927	-1.65705	0.696475
2-Ketoisocaproic acid	-2.1726	0.057868	0.177927	-1.02806	0.473192
Ribose	-2.30283	0.0539321	0.177927	-0.83414	0.362224
Ribose 5 phosphate	-2.20371	0.0581517	0.177927	-0.240512	0.10914
Galacturonic acid	-2.34193	0.0571716	0.177927	-0.208902	0.0892008
1 Hexadecanol	2.39846	0.0545734	0.177927	0.229262	0.0955869
2 Aminobutyric acid	2.45311	0.0572089	0.177927	0.311445	0.126959
Creatinine	2.20502	0.0558749	0.177927	0.748519	0.339461
Benzoic acid	-2.17691	0.0609768	0.183827	-0.184254	0.0846404
3-Methyl-2-oxovaleric acid	-2.12666	0.0624114	0.185425	-0.674943	0.317373
Thymine	2.10939	0.0643819	0.188547	0.435454	0.206436
2 Keto isovaleric acid	-2.07178	0.068232	0.197008	-0.545122	0.263118
2-Ketoglutaric acid	-2.0436	0.0714537	0.203445	-0.974918	0.477059
Glucose 6 phosphate	2.12585	0.0739973	0.207612	0.374757	0.176285
Aconitic acid	2.14152	0.0749427	0.207612	0.555298	0.259301
Ribulose 5 phosphate	-2.28954	0.0767181	0.208143	-0.464285	0.202785
Methylsuccinic acid	2.01932	0.0771652	0.208143	0.257136	0.127338
Sorbitol	2.00269	0.0805701	0.214505	0.136411	0.068114
Azelaic acid	-1.99532	0.0845708	0.22066	-0.45557	0.228319
Dihydroxyacetone phosphate	1.96707	0.0860212	0.22066	0.159895	0.0812858
N Acetylmannosamine	2.04431	0.0861112	0.22066	0.437473	0.213995
Oleic acid	2.0061	0.0928887	0.232222	0.107344	0.053509
4 Hydroxyproline	1.85824	0.0965254	0.232417	0.12065	0.064927
Linoleic acid	1.91619	0.0975019	0.232417	0.130936	0.0683316
Inositol phosphate	1.957	0.0961231	0.232417	0.247905	0.126676
Ribose 5 phosphate	-1.94471	0.102075	0.235873	-0.374369	0.192506
Glucose	-1.85758	0.102403	0.235873	-0.15211	0.0818859
Succinic acid	1.86112	0.101176	0.235873	0.72315	0.388556
3-Hydroxyisovaleric acid	-1.75134	0.116922	0.261114	-1.46577	0.836942
Pyridoxine	-1.83853	0.115779	0.261114	-0.127127	0.069146
Eicosapentaenoic acid	-1.77454	0.117183	0.261114	-0.0857743	0.048336
Hippuric acid	-1.68242	0.130654	0.288001	-0.261746	0.155577
Dopamine	1.65948	0.134233	0.292742	0.457809	0.275875
1 6 Anhydroglucose	1.80034	0.136032	0.293544	0.875805	0.486466
Isocitric acid	1.64592	0.144897	0.309416	0.113737	0.069102
Threonic acid	1.63039	0.147392	0.311499	0.647224	0.396974
2 Hydroxyisovaleric acid	1.6881	0.149458	0.312641	0.243536	0.144266
Arabinose	-1.55508	0.157152	0.325415	-0.118941	0.0764852
4 Hydroxybenzoic acid	-1.52029	0.169499	0.344032	-0.148652	0.0977783
Margaric acid	-1.5023	0.174062	0.34983	-0.086838	0.0578034
Phosphoenolpyruvic acid	1.47669	0.178169	0.354608	0.125135	0.0847397
Acetylglycine	1.48051	0.182403	0.359544	0.956603	0.646133
Glycine	-1.42048	0.191023	0.37295	-0.0607915	0.0427963
Dihydroxyacetone	1.46899	0.196386	0.376254	0.146376	0.0996435
Glutamine	1.54796	0.19571	0.376254	1.71888	1.11042
Acetoacetic acid	-1.47439	0.198393	0.37658	-0.39937	0.270871
5 Aminovaleric acid	1.49015	0.206	0.387431	0.292116	0.196031
5-Methoxytryptamine	-1.35789	0.208857	0.389234	-0.611525	0.45035
Tartaric acid	-1.36648	0.210894	0.389489	-0.245694	0.1798
Inositol	-1.35857	0.214935	0.393408	-0.140876	0.103694
Phenylpyruvic acid	-1.37175	0.219594	0.398378	-0.397814	0.290004
Oleamide	-1.30835	0.223839	0.399018	-0.290764	0.222237
Niacinamide	1.32397	0.223299	0.399018	0.218421	0.164974
Monostearin	-1.30141	0.226494	0.400077	-0.119286	0.091659
Glutamic acid	1.31568	0.228337	0.400077	0.056619	0.043034
Xylitol	1.2484	0.249777	0.42805	0.266255	0.213278
Mannose 6 phosphate	1.25977	0.25255	0.42805	0.278124	0.220773
Hydroxylamine	1.31815	0.24701	0.42805	0.329654	0.250089
Cadaverine	1.23387	0.252654	0.42805	1.99306	1.6153
2 Aminoethanol	-1.20487	0.260407	0.437569	-0.932557	0.773989
Citramalic acid	-1.24812	0.273018	0.452736	-0.644066	0.516029
Proline	1.2546	0.27385	0.452736	0.636235	0.507122
Homocysteine	1.15182	0.28338	0.458627	0.169866	0.147476
Ornithine	1.22334	0.284125	0.458627	0.368895	0.301548
Glyceric acid	1.1667	0.281458	0.458627	0.759726	0.651177
Phenylacetic acid	1.12171	0.295192	0.472769	0.361755	0.322502
O-Phosphoethanolamine	-1.03491	0.328196	0.498372	-0.553374	0.534708
Methionine	1.07138	0.317226	0.498372	0.083944	0.0783516
Tryptamine	1.12734	0.319628	0.498372	0.123684	0.109713
4 Aminobenzoic acid	1.094	0.32293	0.498372	0.213012	0.194709
Tyramine	1.10683	0.327366	0.498372	0.318115	0.287412
Lysine	1.11788	0.323192	0.498372	0.331179	0.296257
Taurine	1.0861	0.32438	0.498372	0.35398	0.325919
Hypotaurine	-1.03027	0.331074	0.499046	-0.461138	0.447591
Aspartic acid	-1.04487	0.342536	0.512553	-0.093138	0.0891381
Fructose	-0.998083	0.347726	0.51655	-0.203046	0.203436
Ornithine	1.00227	0.355293	0.522754	0.135789	0.135482
Lysine	0.978633	0.357003	0.522754	0.615455	0.628892
Guanine	-0.960197	0.362729	0.527372	-0.107081	0.11152
Octopamine	0.972843	0.367684	0.530811	0.108155	0.111174
Spermidine	0.978956	0.380946	0.546111	0.114355	0.116813
3 Aminoglutaric acid	-0.942863	0.386365	0.546241	-0.0854731	0.0906528
Cysteine	0.972492	0.383999	0.546241	0.275855	0.283657
Sucrose	-0.900484	0.401246	0.563393	-0.265394	0.294724
O Phosphoethanolamine	0.873815	0.406633	0.567074	0.306515	0.350778
Docosahexaenoic acid	-0.861714	0.41314	0.568414	-0.0566288	0.0657165
Batyl alcohol	0.874228	0.41089	0.568414	0.16233	0.185684
Uridine	0.859771	0.420964	0.571507	0.224515	0.261133
Histidine	0.880874	0.419259	0.571507	0.346172	0.392988
Inositol	-0.817331	0.437117	0.585356	-0.18019	0.220462
4 Aminobutyric acid	0.825634	0.439731	0.585356	0.146173	0.177044
3 Aminopropanoic acid	0.814172	0.438569	0.585356	0.285399	0.350539
Lyxose	-0.807528	0.447903	0.58859	-0.138098	0.171013
3 Aminopropanoic acid	0.79829	0.447886	0.58859	0.802319	1.00505
Docosapentaenoic acid	0.791229	0.461091	0.598382	0.0959629	0.121283
N Acetylaspartic acid	0.783859	0.463152	0.598382	0.29727	0.379239
Glycine	0.768346	0.464111	0.598382	0.92125	1.199
Stearic acid	-0.760233	0.469572	0.601639	-0.0640431	0.0842413
Lauric acid	0.714409	0.493147	0.62792	0.09788	0.137008
Serine	-0.622387	0.553632	0.700584	-0.0634605	0.101963
Phenylalanine	0.614529	0.55721	0.700785	0.0456777	0.0743296
Palmitic acid	0.610641	0.564492	0.705616	0.0354173	0.0580002
meso Erythritol	-0.595733	0.572125	0.710822	-0.0384576	0.0645551
Glucono 1 5 lactone	-0.584608	0.579419	0.715547	-0.071686	0.122622
Arginine	0.578693	0.584823	0.717897	0.0488496	0.0844137
Hydroquinone	0.549996	0.595753	0.72696	0.0691104	0.125656
Glycolic acid	0.522071	0.615217	0.74188	0.080532	0.154255
Glucose 6 phosphate	-0.504869	0.626202	0.75071	-0.125864	0.249299
2 Aminopimelic acid	0.483778	0.649439	0.774041	0.0462838	0.0956717
Ribonolactone	-0.425492	0.680492	0.806364	-0.10768	0.253072
Adenine	0.394021	0.703428	0.828752	0.0289294	0.073421
Mesaconic acid	0.368475	0.722057	0.845838	0.026333	0.071465
Alanine	0.359651	0.729164	0.849311	0.0430312	0.119647
2 Deoxy glucose	-0.349062	0.735817	0.849671	-0.376502	1.07861
Methionine sulfone	0.348043	0.737763	0.849671	0.0427314	0.122776
Dopamine	0.289049	0.782715	0.896405	0.140332	0.485495
2 Hydroxyisobutyric acid	-0.276523	0.793058	0.903205	-0.0514243	0.185968
3 Aminoisobutyric acid	-0.248266	0.809972	0.910931	-0.0999346	0.402531
5 Oxoproline	-0.253183	0.806843	0.910931	-0.0263188	0.103952
Norepinephrine	0.243618	0.813172	0.910931	0.0358179	0.147025
Indol 3 acetic acid	-0.227461	0.826088	0.92037	-0.0462995	0.203549
4 Hydroxyphenyllactic acid	-0.181492	0.860126	0.94496	-0.0176317	0.0971484
Xanthine	0.185156	0.857743	0.94496	0.0182462	0.098545
Glycerol	0.179966	0.861988	0.94496	0.0253241	0.140716
Putrescine	-0.167081	0.872287	0.949027	-0.0335924	0.201055
5 Methoxytryptamine	0.166471	0.874957	0.949027	0.0395107	0.237343
Uracil	0.151233	0.884856	0.954713	0.0079051	0.052271
Threonine	0.125112	0.903791	0.966153	0.0126271	0.100926
Cystathionine	0.125656	0.904884	0.966153	0.0178326	0.141915
Lyxose	-0.101382	0.922245	0.969904	-0.0192851	0.190223
Threitol	0.094367	0.927323	0.969904	0.00956177	0.101325
Phosphoric acid	0.100833	0.922395	0.969904	0.0120612	0.119615
Xylose	0.0957622	0.926661	0.969904	0.0164144	0.171408
Valine	0.07177	0.944738	0.973223	0.00752854	0.104898
Leucine	0.0752203	0.942063	0.973223	0.0079287	0.105406
Mannose 6 phosphate	0.0799617	0.938031	0.973223	0.0113478	0.141915
Tryptophan	-0.0631215	0.952266	0.976073	-0.00660805	0.104688
3 Hydroxypyruvic acid	-0.0269903	0.979141	0.988788	-0.00899525	0.333277
Urea	-0.0365516	0.971851	0.988788	-0.00303825	0.0831221
Tyrosine	-0.028394	0.978086	0.988788	-0.00250265	0.0881403
Isoleucine	0.0194246	0.985026	0.989854	0.00200328	0.103131
Arabitol	-0.0124068	0.990431	0.990431	-0.000781812	0.0630148

## Sheet: SH-SY5Y Tim8a MUT vs control
hTim8a MUT SHSY5Y
BH-adjusted p-Value < 0.05
Negative fold change means: metabolite is lower in control cells than KO
SORTED from p-value
Metabolites	t-statistic	p-value	BH Adjusted p-value	fold change	standard error
L.2.Hydroxyglutaric.acid_HMDB0000694	-11.3912	6.6e-06	0.0012134	-1.3493	0.118451
3.Hydroxyglutaric.acid_HMDB0000428	-8.7459	1.17e-05	0.0012134	-1.36511	0.156085
Hypoxanthine_HMDB0000157	-7.08745	3.47e-05	0.00240615	-0.529674	0.074734
Maleic.acid_HMDB0000176	-7.78771	0.000139951	0.00505533	-0.652906	0.0838379
L.Aspartic.acid_HMDB0000191	6.5554	0.000168762	0.00505533	0.607306	0.0926422
Uridine_HMDB0000296	-7.22776	0.000206493	0.00505533	-0.94451	0.130678
2.Methyl.3.hydroxybutyric.acid_HMDB0000354	5.67781	0.000207478	0.00505533	0.559083	0.0984681
Pyridoxamine_HMDB0001431	-5.91327	0.00021874	0.00505533	-0.578143	0.0977704
L.Tyrosine_HMDB0000158	-5.7195	0.000251447	0.00523009	-0.42048	0.0735169
Beta.Alanine_HMDB0000056	5.64824	0.000319766	0.00587991	0.395765	0.0700687
3.aminoglutaric.acid_1	5.70599	0.000339226	0.00587991	0.541832	0.0949585
4.Hydroxyphenylpyruvic.acid_HMDB0000707	-5.45784	0.000409199	0.00654719	-0.387578	0.071013
2.Methyl.3.hydroxybutyric.acid_HMDB0000354.1	5.21554	0.000612246	0.00842791	0.522392	0.100161
N.Acetylglutamine_HMDB0006029	-5.21334	0.000657492	0.00842791	-0.377922	0.0724912
Glyceraldehyde_HMDB0001051	-4.83486	0.000687284	0.00842791	-0.34217	0.0707714
Ornithine_HMDB0000214	-6.1187	0.000697564	0.00842791	-0.50634	0.0827529
Galactitol_HMDB0000107	-5.11443	0.000737835	0.00842791	-0.532648	0.104146
L.Leucine_HMDB0000688	-5.61554	0.000769857	0.00842791	-0.775009	0.138011
Mesaconic.acid_HMDB0000749	4.75763	0.000919903	0.00953854	0.467204	0.0982009
2.Aminoheptanedioic.acid_HMDB0034252	-4.65269	0.00102851	0.00953854	-0.508888	0.109375
3.Hydroxybutyric.acid_HMDB0000357	-4.632	0.0010394	0.00953854	-0.320945	0.0692886
Tyramine_HMDB0000306	-5.32658	0.00105474	0.00953854	-0.488682	0.091744
Glycerol_HMDB0000131	-5.35733	0.00114789	0.00994842	-0.780399	0.145669
Sorbitol_HMDB0000247	-4.78553	0.00124588	0.00996707	-0.528619	0.110462
Glutaric.acid_HMDB0000661	-4.58902	0.00131989	0.0101681	-0.515949	0.112431
L.Glutamine_HMDB0000641	-4.71189	0.00149833	0.0108232	-1.88263	0.39955
2.3.Dihydroxybutanedioic.acid_HMDB0059916	-4.33955	0.00153073	0.0108232	-0.627724	0.144652
L.Lysine_HMDB0000182	-5.16009	0.00156104	0.0108232	-0.490549	0.095066
Citric.acid_HMDB0000094	-4.26401	0.00168178	0.0112842	-0.489313	0.114754
Methionine.sulfone_	-5.32274	0.0018118	0.0117052	-1.21194	0.227691
Malic.acid_HMDB0000744	5.00687	0.00185708	0.0117052	0.591493	0.118136
Taurine_HMDB0000251	5.04516	0.00201463	0.0123248	0.491038	0.0973287
3.Phosphoglyceric.acid_HMDB0000807	4.2515	0.00234461	0.0133989	0.383365	0.0901717
3.Aminoisobutanoic.acid_HMDB0003911	4.47353	0.00235213	0.0133989	0.612734	0.136969
D.Glucose_HMDB0000122.1	-4.32238	0.00238345	0.0133989	-0.27839	0.0644068
2.Phosphoglyceric.acid_HMDB0000362	4.52152	0.00315638	0.0171982	0.617665	0.136606
Epinephrine_HMDB0000068	-4.44601	0.00322467	0.0171982	-1.61347	0.362902
Dodecanoic.acid_HMDB0000638	-3.79167	0.00399522	0.0203339	-0.327448	0.0863598
D.Ribose.5.phosphate_HMDB0001548.1	3.93187	0.00414623	0.0203339	0.617049	0.156935
Inosine_HMDB0000195	-3.85873	0.00418759	0.0203339	-0.512848	0.132906
L.Arginine_HMDB0000517	-4.48871	0.00420364	0.0203339	-0.690582	0.153849
L.Isoleucine_HMDB0000172	-3.67069	0.00442871	0.0206955	-0.304068	0.0828368
D.Glucose_HMDB0000122	-3.68585	0.00447739	0.0206955	-0.351711	0.0954219
Docosahexaenoic.acid_HMDB0002183	-3.61894	0.00476077	0.021527	-0.448178	0.123842
Hydroxylamine_HMDB0003338	-3.64071	0.00494573	0.0218875	-0.706969	0.194184
L.Valine_HMDB0000883	-3.61349	0.00506691	0.0219566	-0.301046	0.0833118
Capric.acid_HMDB0000511	-3.86441	0.00541337	0.0229792	-0.369938	0.0957296
Pelargonic.acid_HMDB0000847	-4.17021	0.00552793	0.0229962	-0.391286	0.0938289
Stearic.acid_HMDB0000827	-3.8714	0.00644828	0.0262989	-0.33442	0.0863823
L.Tryptophan_HMDB0000929	-3.81953	0.00811172	0.0324469	-0.992763	0.259918
Creatinine_HMDB0000562	3.28591	0.00896387	0.035179	0.626864	0.190774
D.Ribose.5.phosphate_HMDB0001548	3.37824	0.0095459	0.0364718	0.497351	0.147222
Heptadecanoic.acid_HMDB0002259	-3.59181	0.00964399	0.0364718	-0.285092	0.0793728
Benzoic.acid_HMDB0001870	-3.13854	0.0105668	0.0392482	-0.331592	0.105652
Oxalic.acid_HMDB0002329	-3.17805	0.0109182	0.0393229	-0.417513	0.131374
Palmitic.acid_HMDB0000220	-3.26602	0.010965	0.0393229	-0.258293	0.0790851
Succinic.acid_HMDB0000254	-3.23745	0.0114384	0.0403253	-0.6175	0.190737
N6.Acetyl.L.lysine_HMDB0000206	-3.28469	0.0118039	0.0409201	-0.221786	0.0675211
Caprylic.acid_HMDB0000482	-3.57861	0.012057	0.0411125	-0.377519	0.105493
Caproic.acid_HMDB0000535	-3.04144	0.0127932	0.0429191	-0.359582	0.118227
Uracil_HMDB0000300	-2.98711	0.0139656	0.0461085	-0.301499	0.100934	BH-adjusted p-value significant
Orotic.acid_HMDB0000226	-3.0037	0.0170829	0.0555196	-0.407132	0.135543
Hydroxyphenyllactic.acid_HMDB0000755	-3.36391	0.017834	0.0570688	-1.18476	0.352199
Phenylacetic.acid_HMDB0000209	-2.77511	0.0200285	0.0628751	-0.355691	0.128172
L.Proline_HMDB0000162	-2.75923	0.020253	0.0628751	-0.299201	0.108437
D.Arabitol_HMDB0000568	2.92407	0.0220365	0.0669384	0.383987	0.131319
Fumaric.acid_HMDB0000134	-2.77692	0.0222055	0.0669384	-0.337911	0.121686
Urea_HMDB0000294	-2.73948	0.0236291	0.0702121	-0.250557	0.0914615
Ribitol_HMDB0000508	2.8483	0.0239814	0.0702553	0.362911	0.127413
Mannose.6.phosphate_HMDB0001078	-2.66629	0.0247522	0.0715062	-0.22316	0.0836969
Xanthine_HMDB0000292	-2.80239	0.0294815	0.0837648	-0.711812	0.254002
Alpha.Hydroxyisobutyric.acid_HMDB0000729	-2.63746	0.0298009	0.0837648	-0.317247	0.120285
Lyxose_1	2.55726	0.0322848	0.0876064	0.670204	0.262079
Galacturonic.acid_HMDB0002545	-2.47459	0.0328731	0.0876064	-0.302571	0.122271
Cadaverine_HMDB0002322	2.53033	0.0331121	0.0876064	0.276569	0.109302
Glucosamine_HMDB0001514.1	2.63999	0.0331325	0.0876064	0.246667	0.0934348
Oleic.acid_HMDB0000207	-2.47922	0.0334658	0.0876064	-0.198699	0.0801455
Glucosamine_HMDB0001514	-2.45382	0.0340357	0.0876064	-0.231995	0.0945446
Hypotaurine_HMDB0000965	2.55292	0.034116	0.0876064	0.285572	0.111861
Elaidic.acid_HMDB0000573	-2.37577	0.0396156	0.100488	-0.19198	0.0808077
2.Hydroxybutyric.acid_HMDB0000008	-2.34728	0.0408312	0.102324	-0.247482	0.105434
N.Acetylglutamine_HMDB0006029.1	-2.34784	0.0423501	0.104867	-0.494013	0.210412
Oxoglutaric.acid_HMDB0000208	2.2811	0.0465098	0.112489	0.735923	0.322617
X.S..3.Hydroxyisobutyric.acid_HMDB0000023	-2.25978	0.0473872	0.113294	-0.194368	0.0860119
L.Cystathionine_HMDB0000099	-2.50564	0.0496195	0.117282	-1.27255	0.507873	p-value significant
L.Lactic.acid_HMDB0000190	-2.20178	0.0524568	0.122596	-0.224898	0.102144
L.Phenylalanine_HMDB0000159	-2.18828	0.0537462	0.123581	-0.166532	0.0761017
N.Acetylserine_HMDB0002931	2.30653	0.0540669	0.123581	0.276873	0.120039
Glycolic.acid_HMDB0000115	-2.16976	0.0552222	0.12485	-0.223005	0.102778
Ribonic.acid_HMDB0000867	2.27999	0.0605093	0.135333	0.353582	0.155081
Acetylglycine_HMDB0000532.1	-2.09166	0.0634262	0.140347	-0.816843	0.390524
Isocitric.acid_HMDB0000193	-2.32271	0.0648989	0.142094	-0.553491	0.238295
Glucose.6.phosphate_HMDB0001401	-1.98298	0.0820635	0.175971	-0.223461	0.112689
Nicotinic.acid_HMDB0001488	-1.91892	0.0839617	0.178204	-0.29397	0.153195
D.Xylulose_HMDB0001644	2.10823	0.0858265	0.178978	0.641805	0.304428
D.Ribulose_HMDB0000621	2.126	0.086047	0.178978	0.741917	0.348973
D.Xylose_HMDB0000098	1.93235	0.0883641	0.181978	0.493038	0.255149
Ethanolamine_HMDB0000149	-1.87281	0.0921592	0.187933	-0.238545	0.127373
D.Arabinose_HMDB0029942	1.8133	0.102328	0.205736	0.414628	0.228659
Acetoacetic.acid_HMDB0000060	-1.79658	0.102868	0.205736	-0.325409	0.181127
Palmitoleic.acid_HMDB0003229	-1.78409	0.105851	0.209685	-0.13579	0.0761118
L.Serine_HMDB0000187	-1.76243	0.10848	0.212866	-0.148776	0.0844153
Myristic.acid_HMDB0000806	-1.71954	0.116547	0.224448	-0.139743	0.081268
Pyruvic.acid_HMDB0000243	1.73005	0.116686	0.224448	0.606797	0.35074
Beta.Alanine_HMDB0000056.1	1.75426	0.117619	0.224448	0.274527	0.156492
Xanthosine_HMDB0000299	1.72179	0.12118	0.229141	0.219717	0.127609
Threonic.acid_HMDB0000943	1.74136	0.122341	0.229251	0.260289	0.149475
D.Glucuronic.acid_HMDB0000127	-1.73736	0.130442	0.242249	-1.49775	0.862083
Norepinephrine_HMDB0000216	1.63517	0.1337	0.244626	0.254685	0.155754
3.Methyl.2.oxovaleric.acid_HMDB0000491	1.7061	0.134074	0.244626	0.543354	0.318478
Dihydroxyacetone.phosphate_HMDB0001473	-1.62096	0.136432	0.246765	-1.24045	0.765257
Azelaic.acid_HMDB0000784	-1.63856	0.139029	0.249293	-0.260609	0.159048
Hydroquinone_HMDB0002434	-1.73918	0.140894	0.250478	-0.251553	0.144639
Glyceric.acid_HMDB0000139	-1.56684	0.148882	0.260415	-0.377069	0.240655
N.Acetylneuraminic.acid_HMDB0000230	1.63417	0.148987	0.260415	0.329178	0.201435
Mannitol_HMDB0000765	-1.56981	0.156392	0.269526	-0.173642	0.110613
D.Ribose_HMDB0000283	1.54327	0.156792	0.269526	0.258868	0.16774
Linoleic.acid_HMDB0000673	-1.58346	0.15849	0.270212	-0.23062	0.145643
L.Glutamic.acid_HMDB0000148	-1.52489	0.172703	0.291013	-0.142735	0.0936036
Fructose.1.phosphate_HMDB0001076.1	1.57799	0.173489	0.291013	0.353018	0.223714
Thymine_HMDB0000262	-1.42302	0.193177	0.320827	-0.274319	0.192773
Fructose.1.phosphate_HMDB0001076	1.49189	0.194347	0.320827	0.398792	0.267307
1.Hexadecanol_HMDB0003424	-1.37254	0.200692	0.328693	-0.13816	0.10066
Guanine_HMDB0000132	-1.40507	0.204015	0.331525	-0.312846	0.222655
4.Hydroxybenzoic.acid_HMDB0000500	-1.35367	0.205649	0.331589	-0.172266	0.127259
Erythritol_HMDB0002994	-1.27394	0.235798	0.377277	-0.121236	0.0951668
Putrescine_HMDB0001414	-1.22827	0.257937	0.40955	-0.187226	0.152431
Pyridoxine_HMDB0000239	-1.1785	0.268841	0.423628	-0.103929	0.0881877
Galacturonic.acid_HMDB0002545.1	-1.21154	0.271813	0.425091	-0.217043	0.179147
Phosphoserine_HMDB0000272	-1.14532	0.278771	0.43272	-0.616152	0.537974
3.Hydroxyisovaleric.acid_HMDB0000754	-1.13588	0.283545	0.43687	-0.0987937	0.0869754
Arachidonic.acid_HMDB0001043	-1.13059	0.286994	0.438932	-0.126594	0.111971
Dihydroxyacetone.phosphate_HMDB0001473.1	-1.14266	0.291275	0.442228	-0.0942716	0.0825018
Adenosine_HMDB0000050	-1.13557	0.297926	0.449047	-0.300874	0.264953
L.Threonine_HMDB0000167	-1.08573	0.304786	0.456082	-0.08391	0.0772841
3.Hydroxymethylglutaric.acid_HMDB0000355	-1.04497	0.327494	0.486562	-0.141783	0.135681
4.Hydroxyproline_HMDB0000725	-1.02239	0.338233	0.498953	-0.0732961	0.0716913
D.Xylitol_HMDB0002917	-0.976526	0.367955	0.536251	-0.210183	0.215235
Oxoglutaric.acid_HMDB0000208.1	-0.947027	0.368673	0.536251	-0.222793	0.235255
Dopamine_HMDB0000073	0.932499	0.375181	0.541928	0.499992	0.536185
Beta.Glycerophosphoric.acid_HMDB0002520	-0.923528	0.382403	0.54855	-0.060591	0.0656082
Glucose.6.phosphate_HMDB0001401.1	-0.901476	0.391898	0.55832	-0.0684703	0.0759535
N.Acetyl.L.aspartic.acid_HMDB0000812	0.905284	0.394901	0.558771	0.111329	0.122977
5.Aminopentanoic.acid_HMDB0003355	0.894133	0.39881	0.56049	0.0896674	0.100284
Gluconolactone_HMDB0000150	0.859476	0.424426	0.592487	0.152736	0.177709
Cholesterol_HMDB0000067	0.81596	0.436028	0.604625	0.0862243	0.105672
Gamma.Aminobutyric.acid_HMDB0000112	0.813715	0.439204	0.604997	0.0584333	0.0718105
Pyruvic.acid_HMDB0000243.1	0.789324	0.450002	0.615694	0.0825913	0.104636
O.Phosphoethanolamine_HMDB0000224.1	0.791389	0.45289	0.615694	0.124008	0.156697
Alpha.Lactose_HMDB0000186.1	0.766199	0.462546	0.624737	0.646135	0.843299
O.Acetylserine_HMDB0003011	-0.751961	0.470625	0.629116	-0.0522256	0.0694526
3.Methyl.2.oxovaleric.acid_HMDB0000491.1	0.756245	0.471837	0.629116	0.156256	0.206621
Dimethylglycine_HMDB0000092	-0.713828	0.491974	0.651787	-0.118897	0.166563
Ketoleucine_HMDB0000695	0.697936	0.503534	0.658964	0.173586	0.248714
Niacinamide_HMDB0001406	-0.697818	0.503728	0.658964	-0.0514314	0.0737031
N.Acetylmannosamine_HMDB0001129	-0.690761	0.51251	0.665042	-0.0863192	0.124962
Methylsuccinic.acid_HMDB0001844	0.676923	0.517091	0.665042	0.132903	0.196334
Alpha.Lactose_HMDB0000186	-0.691638	0.517965	0.665042	-0.27345	0.395366
Citramalic.acid_HMDB0000426	0.658932	0.531247	0.67791	0.162551	0.246689
Inositol.phosphate_HMDB0002985	0.6414	0.538079	0.682442	0.0714774	0.11144
Levoglucosan_HMDB0000640	-0.628096	0.554878	0.699482	-0.0645954	0.102843
Fructose.6.phosphate_HMDB0000124	-0.57633	0.585045	0.733068	-0.150228	0.260663
L.Homoserine_HMDB0000719	0.531191	0.608045	0.757325	0.100327	0.188873
Ribonolactone_HMDB0001900	-0.522477	0.612901	0.758463	-0.222007	0.424913
2.Deoxyglucose._HMDB0062477	-0.521869	0.616883	0.758463	-0.414725	0.794691
Mannose.6.phosphate_HMDB0001078.1	-0.512984	0.619898	0.758463	-0.673256	1.31243
3.Hydroxyanthranilic.acid_HMDB0001476	0.490828	0.637168	0.775035	0.0454818	0.0926634
5.Methoxytryptamine_HMDB0004095	-0.476776	0.643849	0.778609	-0.528317	1.1081
D.Threitol_HMDB0004136	0.461163	0.657569	0.787287	0.0510189	0.110631
L.Dopa_HMDB0000181	-0.46217	0.660552	0.787287	-0.0574636	0.124335
O.Phosphoethanolamine_HMDB0000224	0.45246	0.662381	0.787287	0.135599	0.299693
Pantothenic.acid_HMDB0000210	0.447607	0.669256	0.790939	0.0484514	0.108245
Eicosapentaenoic.acid_HMDB0001999	-0.433555	0.674173	0.792249	-0.130085	0.300043
L.Alanine_HMDB0000162	-0.419867	0.683476	0.798669	-0.0415531	0.0989672
1.2.3.Trihydroxybenzene_HMDB0013674	-0.393118	0.703343	0.817292	-0.0636352	0.161873
Glucaric.acid_HMDB0000663	-0.391466	0.70764	0.817717	-0.0509561	0.130167
D.Alpha.aminobutyric.acid_HMDB0000650	-0.378575	0.713176	0.818717	-0.031265	0.0825859
Sucrose_HMDB0000258	-0.37505	0.716377	0.818717	-0.175677	0.468409
Homocysteine_HMDB0000742	-0.361714	0.729944	0.829663	-0.0634168	0.175323
Glutamic.acid.13C5.3TMS	-0.340658	0.740674	0.837283	-0.0344303	0.10107
L.Cysteine_HMDB0000574	-0.327076	0.750739	0.844075	-0.0690869	0.211226
Cytosine_HMDB0000630	-0.309163	0.763832	0.851016	-0.0495726	0.160345
Isobutyrylglycine_HMDB0000730	-0.305454	0.766426	0.851016	-0.023115	0.0756742
D.Fructose_HMDB0000660	0.307213	0.769187	0.851016	0.0672036	0.218752
L.Methionine_HMDB0000696	-0.277052	0.787398	0.861517	-0.0221116	0.0798102
5.Methoxytryptamine_HMDB0004095.1	0.274115	0.790652	0.861517	0.0187958	0.0685689
p.Octopamine_HMDB0004825	0.268606	0.79402	0.861517	0.132491	0.493254
DL.2.Aminooctanoic.acid_HMDB0000991	0.266652	0.795247	0.861517	0.020585	0.0771979
Triethanolamine_HMDB0032538	0.228591	0.823797	0.887822	0.0540507	0.236451
Glycine_HMDB0000123	0.207736	0.839734	0.900333	0.0269631	0.129795
MG.18.0e.0.0.0.0._HMDB0011143	0.196162	0.84848	0.905045	0.119677	0.610094
2.Deoxyglucose_HMDB0062477	0.14846	0.88596	0.93614	0.0203372	0.136988
Cystamine_	-0.146264	0.886632	0.93614	-0.0737977	0.504553
Tryptamine_HMDB0000303	-0.126396	0.901949	0.943806	-0.0705306	0.558011
Gamma.Aminobutyric.acid_HMDB0000112.1	-0.121925	0.905858	0.943806	-0.0138183	0.113335
Pyridoxal_HMDB0001545	0.120647	0.907506	0.943806	0.0208772	0.173043
Phenylpyruvic.acid_HMDB0000205	0.111423	0.91349	0.945303	0.0162587	0.145919
7.Methylguanine_HMDB0000897	-0.0789321	0.939701	0.967613	-0.0313273	0.396889
D.Fructose_HMDB0000660.1	0.069791	0.946416	0.969727	0.0117496	0.168355
Adenine_HMDB0000034	0.0445469	0.965566	0.980629	0.00648954	0.145679
Trehalose_HMDB0000975	-0.0436306	0.966485	0.980629	-0.0278856	0.63913
2.Aminoisobutyric.acid_HMDB0001906	0.0360171	0.972292	0.981732	0.00534143	0.148303
N.Acetyl.L.tyrosine_HMDB0000866	0.023484	0.981787	0.981787	0.00578734	0.246437
