# Supplementary material for: Function of hTim8a in complex IV assembly in neuronal cells provides insight into pathomechanism underlying Mohr-Tranebjærg syndrome
Source: eLife. 2019 Nov 4;8:e48828. doi: 10.7554/eLife.48828 (PMC6861005; doi:10.7554/eLife.48828)
Supplement: Figure 5—source data 2. [file elife-48828-fig5-data2.xlsx]

## Sheet: Sheet1
t-Test: Two-Sample Assuming Equal Variances
	Variable 1	Variable 2
Mean	0.464743	0.605979
Variance	0.00844404	2.35917e-05
Observations	3	3
Pooled Variance	0.00423382
Hypothesized Mean Difference	0
df	4
t Stat	-2.65844
P(T<=t) one-tail	0.0282412
t Critical one-tail	2.13185
P(T<=t) two-tail	0.0564823
t Critical two-tail	2.77645

## Sheet: Sheet2
t-Test: Two-Sample Assuming Equal Variances
	Variable 1	Variable 2
Mean	0.25541	0.3318
Variance	0.000528726	0.000105257
Observations	3	3
Pooled Variance	0.000316991
Hypothesized Mean Difference	0
df	4
t Stat	-5.25485
P(T<=t) one-tail	0.00313823
t Critical one-tail	2.13185
P(T<=t) two-tail	0.00627646
t Critical two-tail	2.77645

## Sheet: Sheet3
t-Test: Two-Sample Assuming Equal Variances
	Variable 1	Variable 2
Mean	0.0155768	0.0244584
Variance	1.85784e-05	5.50716e-05
Observations	3	3
Pooled Variance	3.6825e-05
Hypothesized Mean Difference	0
df	4
t Stat	-1.79251
P(T<=t) one-tail	0.0737592
t Critical one-tail	2.13185
P(T<=t) two-tail	0.147518
t Critical two-tail	2.77645

## Sheet: Sheet4
t-Test: Two-Sample Assuming Equal Variances
	Variable 1	Variable 2
Mean	0.0106738	0.0150694
Variance	1.50705e-06	5.56072e-06
Observations	3	3
Pooled Variance	3.53389e-06
Hypothesized Mean Difference	0
df	4
t Stat	-2.86375
P(T<=t) one-tail	0.022878
t Critical one-tail	2.13185
P(T<=t) two-tail	0.0457559
t Critical two-tail	2.77645

## Sheet: Sheet5
t-Test: Two-Sample Assuming Equal Variances
	Variable 1	Variable 2
Mean	0.0207591	0.0410848
Variance	7.13906e-05	2.99321e-05
Observations	3	3
Pooled Variance	5.06614e-05
Hypothesized Mean Difference	0
df	4
t Stat	-3.49745
P(T<=t) one-tail	0.0124768
t Critical one-tail	2.13185
P(T<=t) two-tail	0.0249536
t Critical two-tail	2.77645

## Sheet: Sheet6
t-Test: Two-Sample Assuming Equal Variances
	Variable 1	Variable 2
Mean	0.0150207	0.0189125
Variance	1.75871e-05	1.63894e-05
Observations	3	3
Pooled Variance	1.69882e-05
Hypothesized Mean Difference	0
df	4
t Stat	-1.15645
P(T<=t) one-tail	0.155931
t Critical one-tail	2.13185
P(T<=t) two-tail	0.311862
t Critical two-tail	2.77645

## Sheet: Sheet8
t-Test: Two-Sample Assuming Equal Variances
	Variable 1	Variable 2
Mean	0.328621	0.593893
Variance	0.00114014	8.41939e-05
Observations	3	3
Pooled Variance	0.000612167
Hypothesized Mean Difference	0
df	4
t Stat	-13.1311
P(T<=t) one-tail	9.71195e-05
t Critical one-tail	2.13185
P(T<=t) two-tail	0.000194239
t Critical two-tail	2.77645

## Sheet: Glucose vs Glutamine labeling
SH-SY5Y hTIm8a MUT vs control
Species	Sample Name	average	% labelling	MAX glutamine or glucose labelling	% labelling Normalised to Glc or Glut labelling		RAW SD	Normalised SD
Lactate	Glucose KO 24hrs	0.464743	46.4743	0.806093	57.6537		0.0918915	11.3996
Lactate	Glucose KO 2hrs	0.25541	25.541	0.808917	31.5743		0.022994	2.84257
Lactate	Glucose WT 24hrs	0.605979	60.5979	0.816027	74.2597		0.00485713	0.595217		5-oxoproline is used for normalisation of glutamine labeling
Lactate	Glucose WT 2hrs	0.3318	33.18	0.816805	40.6217		0.0102595	1.25605		Glucose is used for normalisation of glucose labeling
Lactate	Glutamine KO 24hrs	0.0155768	1.55768	0.939548	1.65791		0.00431027	0.45876
Lactate	Glutamine KO 2hrs	0.0106738	1.06738	0.900415	1.18543		0.00122762	0.13634
Lactate	Glutamine WT 24hrs	0.0244584	2.44584	0.945755	2.58612		0.00742103	0.784667
Lactate	Glutamine WT 2hrs	0.0150694	1.50694	0.897415	1.6792		0.00235812	0.262768
Fumarate	Glucose KO 24hrs	0.0207591	2.07591	0.806093	2.57528		0.00844929	1.04818
Fumarate	Glucose KO 2hrs	0.0150207	1.50207	0.808917	1.85689		0.0041937	0.518434
Fumarate	Glucose WT 24hrs	0.0410848	4.10848	0.816027	5.03473		0.00547103	0.670447
Fumarate	Glucose WT 2hrs	0.0189125	1.89125	0.816805	2.31543		0.00404838	0.495636
Fumarate	Glutamine KO 24hrs	0.578643	57.8643	0.939548	61.5874		0.0231904	2.46825
Fumarate	Glutamine KO 2hrs	0.328621	32.8621	0.900415	36.4966		0.033766	3.75005
Fumarate	Glutamine WT 24hrs	0.597693	59.7693	0.945755	63.1975		0.0761602	8.05285
Fumarate	Glutamine WT 2hrs	0.593893	59.3893	0.897415	66.1782		0.00917573	1.02246
Malate	Glucose KO 24hrs	0.0167078	1.67078	0.806093	2.07269		0.0039118	0.485279
Malate	Glucose KO 2hrs	0.00950575	0.950575	0.808917	1.17512		0.00327241	0.404542
Malate	Glucose WT 24hrs	0.0276933	2.76933	0.816027	3.39367		0.000918206	0.112522
Malate	Glucose WT 2hrs	0.00988889	0.988889	0.816805	1.21068		0.00299061	0.366135
Malate	Glutamine KO 24hrs	0.442509	44.2509	0.939548	47.0981		0.0195357	2.07927
Malate	Glutamine KO 2hrs	0.283328	28.3328	0.900415	31.4664		0.0275879	3.06391
Malate	Glutamine WT 24hrs	0.460118	46.0118	0.945755	48.6509		0.0497627	5.26169
Malate	Glutamine WT 2hrs	0.465318	46.5318	0.897415	51.8509		0.00929961	1.03627
Aspartate	Glucose KO 24hrs	0.0140153	1.40153	0.806093	1.73867		0.00134303	0.16661
Aspartate	Glucose KO 2hrs	0.00945246	0.945246	0.808917	1.16853		0.000590305	0.0729748
Aspartate	Glucose WT 24hrs	0.0329145	3.29145	0.816027	4.0335		0.00170748	0.209243
Aspartate	Glucose WT 2hrs	0.0113279	1.13279	0.816805	1.38686		0.000645114	0.0789801
Aspartate	Glutamine KO 24hrs	0.739356	73.9356	0.939548	78.6928		0.00637496	0.678513
Aspartate	Glutamine KO 2hrs	0.511886	51.1886	0.900415	56.85		0.00862938	0.958378
Aspartate	Glutamine WT 24hrs	0.786412	78.6412	0.945755	83.1518		0.0137262	1.45135
Aspartate	Glutamine WT 2hrs	0.675024	67.5024	0.897415	75.2188		0.000803076	0.0894878
5-oxoproline	Glucose KO 24hrs	0.0112542	1.12542	0.806093	1.39614		0.00282254	0.350151
5-oxoproline	Glucose KO 2hrs	0.0139361	1.39361	0.808917	1.72281		0.00669476	0.82762
5-oxoproline	Glucose WT 24hrs	0.0107047	1.07047	0.816027	1.31181		0.000445392	0.0545805
5-oxoproline	Glucose WT 2hrs	0.00977797	0.977797	0.816805	1.1971		0.000717916	0.0878932
5-oxoproline	Glutamine KO 24hrs	0.939548	93.9548	0.939548	100		0.00291657	0.310423
5-oxoproline	Glutamine KO 2hrs	0.900415	90.0415	0.900415	100		0.0124062	1.37783
5-oxoproline	Glutamine WT 24hrs	0.945755	94.5755	0.945755	100		0.00117067	0.123782
5-oxoproline	Glutamine WT 2hrs	0.897415	89.7415	0.897415	100		0.00357101	0.397921
Glutamate	Glucose KO 24hrs	0.00363666	0.363666	0.806093	0.451147		0.000571067	0.0708439
Glutamate	Glucose KO 2hrs	0.00318943	0.318943	0.808917	0.394284		0.000513299	0.0634551
Glutamate	Glucose WT 24hrs	0.0156428	1.56428	0.816027	1.91695		0.000749388	0.0918338
Glutamate	Glucose WT 2hrs	0.00607998	0.607998	0.816805	0.744361		0.000253184	0.0309969
Glutamate	Glutamine KO 24hrs	0.8786	87.86	0.939548	93.5131		0.00449849	0.478792
Glutamate	Glutamine KO 2hrs	0.668552	66.8552	0.900415	74.2493		0.00836059	0.928527
Glutamate	Glutamine WT 24hrs	0.857643	85.7643	0.945755	90.6834		0.0225203	2.3812
Glutamate	Glutamine WT 2hrs	0.816724	81.6724	0.897415	91.0085		0.00490105	0.546129
Gro3P	Glucose KO 24hrs	0.204813	20.4813	0.806093	25.4081		0.0102342	1.2696
Gro3P	Glucose KO 2hrs	0.117252	11.7252	0.808917	14.4949		0.0417033	5.15546
Gro3P	Glucose WT 24hrs	0.117123	11.7123	0.816027	14.3528		0.0105176	1.28887
Gro3P	Glucose WT 2hrs	0.0344354	3.44354	0.816805	4.21586		0.00122869	0.150426
Gro3P	Glutamine KO 24hrs	0.0039919	0.39919	0.939548	0.424875		0.00145044	0.154377
Gro3P	Glutamine KO 2hrs	0.00207179	0.207179	0.900415	0.230093		0.0026376	0.292932
Gro3P	Glutamine WT 24hrs	0.00391839	0.391839	0.945755	0.414313		0.00344839	0.364618
Gro3P	Glutamine WT 2hrs	0.00435003	0.435003	0.897415	0.484729		0.00373879	0.416618
Citrate/Iso	Glucose KO 24hrs	-0.0177448	-1.77448	0.806093	-2.20134		0.00116017	0.143926
Citrate/Iso	Glucose KO 2hrs	-0.0122446	-1.22446	0.808917	-1.5137		0.00474494	0.586579
Citrate/Iso	Glucose WT 24hrs	0.0150419	1.50419	0.816027	1.84331		0.00345108	0.422913
Citrate/Iso	Glucose WT 2hrs	-0.00730589	-0.730589	0.816805	-0.894447		0.00841511	1.03025
Citrate/Iso	Glutamine KO 24hrs	0.156142	15.6142	0.939548	16.6188		0.0381058	4.05576
Citrate/Iso	Glutamine KO 2hrs	0.00335418	0.335418	0.900415	0.372514		0.0141139	1.56749
Citrate/Iso	Glutamine WT 24hrs	0.0891018	8.91018	0.945755	9.42124		0.0506419	5.35465
Citrate/Iso	Glutamine WT 2hrs	0.0848023	8.48023	0.897415	9.44962		0.0246855	2.75073
Glucose	Glucose KO 24hrs	0.806093	80.6093	0.806093	100		0.00985861	1.22301
Glucose	Glucose KO 2hrs	0.808917	80.8917	0.808917	100		0.00580635	0.717794
Glucose	Glucose WT 24hrs	0.816027	81.6027	0.816027	100		0.00492684	0.60376
Glucose	Glucose WT 2hrs	0.816805	81.6805	0.816805	100		0.0063215	0.77393
Glucose	Glutamine KO 24hrs	0.00257608	0.257608	0.939548	0.274183		0.000447869	0.0476686
Glucose	Glutamine KO 2hrs	0.00249803	0.249803	0.900415	0.277431		0.000624418	0.0693479
Glucose	Glutamine WT 24hrs	0.00282976	0.282976	0.945755	0.299207		0.00015576	0.0164694
Glucose	Glutamine WT 2hrs	0.00166438	0.166438	0.897415	0.185463		0.000884362	0.0985455
Tyrosine	Glucose KO 24hrs	0.22295	22.295	0.806093	27.6581		0.0745214	9.24477
Tyrosine	Glucose KO 2hrs	0.267907	26.7907	0.808917	33.1192		0.260343	32.1842
Tyrosine	Glucose WT 24hrs	0.016969	1.6969	0.816027	2.07947		0.00206	0.252443
Tyrosine	Glucose WT 2hrs	0.0473276	4.73276	0.816805	5.79423		0.0164178	2.01
Tyrosine	Glutamine KO 24hrs	0.00453115	0.453115	0.939548	0.482269		0.00159809	0.170091
Tyrosine	Glutamine KO 2hrs	0.0143253	1.43253	0.900415	1.59096		0.0104159	1.15678
Tyrosine	Glutamine WT 24hrs	0.0161992	1.61992	0.945755	1.71283		0.0126936	1.34217
Tyrosine	Glutamine WT 2hrs	0.00583756	0.583756	0.897415	0.650486		0.00153239	0.170756
C16:0_TMS	Glucose KO 24hrs	0.0141554	1.41554	0.806093	1.75605		0.000488337	0.0605808
C16:0_TMS	Glucose KO 2hrs	0.0132139	1.32139	0.808917	1.63353		0.00114279	0.141274
C16:0_TMS	Glucose WT 24hrs	0.0268227	2.68227	0.816027	3.28699		0.00351688	0.430976
C16:0_TMS	Glucose WT 2hrs	0.0173296	1.73296	0.816805	2.12163		0.00202719	0.248185
C16:0_TMS	Glutamine KO 24hrs	0.0488795	4.88795	0.939548	5.20245		0.00856202	0.911291
C16:0_TMS	Glutamine KO 2hrs	0.0163004	1.63004	0.900415	1.81032		0.0030977	0.34403
C16:0_TMS	Glutamine WT 24hrs	0.0499871	4.99871	0.945755	5.28542		0.0184905	1.95511
C16:0_TMS	Glutamine WT 2hrs	0.0323337	3.23337	0.897415	3.60298		0.00316139	0.352277
Cholesterol_TMS	Glucose KO 24hrs	0.00191354	0.191354	0.806093	0.237384		0.00012052	0.0149512
Cholesterol_TMS	Glucose KO 2hrs	0.00204865	0.204865	0.808917	0.253259		0.000244792	0.0302617
Cholesterol_TMS	Glucose WT 24hrs	0.00349883	0.349883	0.816027	0.428764		0.000130593	0.0160035
Cholesterol_TMS	Glucose WT 2hrs	0.00274047	0.274047	0.816805	0.335511		0.000356937	0.0436991
Cholesterol_TMS	Glutamine KO 24hrs	0.0233588	2.33588	0.939548	2.48617		0.00101547	0.10808
Cholesterol_TMS	Glutamine KO 2hrs	0.00248578	0.248578	0.900415	0.27607		0.000240393	0.0266981
Cholesterol_TMS	Glutamine WT 24hrs	0.0172097	1.72097	0.945755	1.81968		0.00523884	0.553933
Cholesterol_TMS	Glutamine WT 2hrs	0.00375452	0.375452	0.897415	0.41837		0.000610343	0.0680112

## Sheet: TCA intermediates
Species	Sample Name	average	% labelling	MAX glutamine/glucose labelling	% labelling Normalised to Glc/Glut labelling	Normalised SD	p value
Fumarate	Glucose KO 24hrs	0.0207591	2.07591	0.806093	2.57528	1.04818	0.0249536
	Glucose KO 2hrs	0.0150207	1.50207	0.808917	1.85689	0.518434	0.311862
	Glucose WT 24hrs	0.0410848	4.10848	0.816027	5.03473	0.670447
	Glucose WT 2hrs	0.0189125	1.89125	0.816805	2.31543	0.495636
	Glutamine KO 24hrs	0.578643	57.8643	0.939548	61.5874	2.87689	0.699804
	Glutamine KO 2hrs	0.328621	32.8621	0.900415	36.4966	4.17422	0.000194239
	Glutamine WT 24hrs	0.597693	59.7693	0.945755	63.1975	9.33305
	Glutamine WT 2hrs	0.593893	59.3893	0.897415	66.1782	1.12337
Malate	Glucose KO 24hrs	0.0167078	1.67078	0.806093	2.07269	0.485279	0.00906788
	Glucose KO 2hrs	0.00950575	0.950575	0.808917	1.17512	0.404542	0.888248
	Glucose WT 24hrs	0.0276933	2.76933	0.816027	3.39367	0.112522
	Glucose WT 2hrs	0.00988889	0.988889	0.816805	1.21068	0.366135
	Glutamine KO 24hrs	0.442509	44.2509	0.939548	47.0981	2.42351	0.598848
	Glutamine KO 2hrs	0.283328	28.3328	0.900415	31.4664	3.41047	0.000412831
	Glutamine WT 24hrs	0.460118	46.0118	0.945755	48.6509	6.09816
	Glutamine WT 2hrs	0.465318	46.5318	0.897415	51.8509	1.13853
Aspartate	Glucose KO 24hrs	0.0140153	1.40153	0.806093	1.73867	0.16661	0.000113039
	Glucose KO 2hrs	0.00945246	0.945246	0.808917	1.16853	0.0729748	0.020566
	Glucose WT 24hrs	0.0329145	3.29145	0.816027	4.0335	0.209243
	Glucose WT 2hrs	0.0113279	1.13279	0.816805	1.38686	0.0789801
	Glutamine KO 24hrs	0.739356	73.9356	0.939548	78.6928	0.790847	0.00574836
	Glutamine KO 2hrs	0.511886	51.1886	0.900415	56.85	1.06678	5.27681e-06
	Glutamine WT 24hrs	0.786412	78.6412	0.945755	83.1518	1.68208
	Glutamine WT 2hrs	0.675024	67.5024	0.897415	75.2188	0.0983192
Glutamate	Glucose KO 24hrs	0.00363666	0.363666	0.806093	0.451147	0.0708439	2.49408e-05
	Glucose KO 2hrs	0.00318943	0.318943	0.808917	0.394284	0.0634551	0.000941224
	Glucose WT 24hrs	0.0156428	1.56428	0.816027	1.91695	0.0918338
	Glucose WT 2hrs	0.00607998	0.607998	0.816805	0.744361	0.0309969
	Glutamine KO 24hrs	0.8786	87.86	0.939548	93.5131	0.55806	0.189111
	Glutamine KO 2hrs	0.668552	66.8552	0.900415	74.2493	1.03355	1.20848e-05
	Glutamine WT 24hrs	0.857643	85.7643	0.945755	90.6834	2.75975
	Glutamine WT 2hrs	0.816724	81.6724	0.897415	91.0085	0.600026
