# Supplementary material for: Function of hTim8a in complex IV assembly in neuronal cells provides insight into pathomechanism underlying Mohr-Tranebjærg syndrome
Source: eLife. 2019 Nov 4;8:e48828. doi: 10.7554/eLife.48828 (PMC6861005; doi:10.7554/eLife.48828)
Supplement: Figure 7—source data 1. [file elife-48828-fig7-data1.xlsx]

## Sheet: Glucose Xlink
LFQ intensity 8A_1	LFQ intensity 8A_2	LFQ intensity 8A_3	LFQ intensity Control_1	LFQ intensity Control_2	LFQ intensity Control_3	C: GOBP slim name	C: MCARTA2_LIST	C: Category	C: Student's T-test Significant DSP crosslinked_Control	C: Student's T-test significant	N: Unique peptides	N: Sequence coverage [%]	N: Mol. weight [kDa]	N: -Log Student's T-test p-value DSP crosslinked_Control	N: Student's T-test Difference DSP crosslinked_Control	N: Student's T-test Test statistic DSP crosslinked_Control	T: Protein IDs	T: Majority protein IDs	T: Protein names	T: Gene names
28.9347	27.4876	27.4784	19.9367	21.0931	21.0212	cellular metabolic process;cellular process;establishment of localization;macromolecule metabolic process;metabolic process;multicellular organismal process;neurological system process;primary metabolic process;protein metabolic process;protein targeting;protein transport;transport	+	Known mitochondrial	+	DSP crosslinked_Control	7	78.9	10.5	3.54536	7.28324	11.9081	Q9Y5L4	Q9Y5L4	Mitochondrial import inner membrane translocase subunit Tim13	TIMM13
27.707	26.3047	26.5685	20.5132	20.8369	20.9227		+	Known mitochondrial	+	DSP crosslinked_Control	18	58.5	32.004	3.77428	6.10245	13.6222	Q96HS1	Q96HS1	Serine/threonine-protein phosphatase PGAM5, mitochondrial	PGAM5
27.5249	25.9685	26.0524	21.4696	21.1548	20.03	cellular metabolic process;cellular process;establishment of localization;macromolecule metabolic process;metabolic process;multicellular organismal process;neurological system process;primary metabolic process;protein metabolic process;protein targeting;protein transport;transport	+	Known mitochondrial	+	DSP crosslinked_Control	4	50.6	9.3435	2.96437	5.63046	8.42762	Q9Y5J9	Q9Y5J9	Mitochondrial import inner membrane translocase subunit Tim8 B	TIMM8B
28.7721	27.6233	27.8885	24.0207	23.0859	21.3062	biological regulation;biosynthetic process;cellular component organization;cellular metabolic process;cellular nitrogen compound metabolic process;cellular process;chromatin modification;chromatin organization;chromosome organization;DNA metabolic process;DNA replication;histone modification;macromolecule metabolic process;macromolecule modification;metabolic process;nitrogen compound metabolic p…	+	Known mitochondrial	+	DSP crosslinked_Control	17	69.5	29.804	2.43477	5.29035	6.09061	P35232	P35232	Prohibitin	PHB
26.4965	25.3714	25.2799	20.127	20.7754	21.0925	anatomical structure development;biosynthetic process;cellular metabolic process;cellular nitrogen compound metabolic process;cellular process;developmental process;generation of precursor metabolites and energy;heterocycle metabolic process;metabolic process;nitrogen compound metabolic process;nucleobase-containing compound metabolic process;nucleobase-containing small molecule interconversion;n…	+	Known mitochondrial	+	DSP crosslinked_Control	11	67.8	26.477	3.32387	5.051	10.4469	P54819	P54819	Adenylate kinase 2, mitochondrial;Adenylate kinase 2, mitochondrial, N-terminally processed	AK2
28.054	26.3	26.562	22.1304	22.0409	21.6679	biological regulation;cellular homeostasis;cellular ion homeostasis;cellular process;homeostatic process;response to abiotic stimulus;response to stimulus;response to stress	+	Known mitochondrial	+	DSP crosslinked_Control	33	48.4	83.677	3.05612	5.02556	8.90542	Q16891	Q16891	MICOS complex subunit MIC60	IMMT
27.5377	26.1724	26.0593	21.4153	21.6776	21.6161	cellular metabolic process;cellular process;generation of precursor metabolites and energy;metabolic process;small molecule metabolic process	+	Known mitochondrial	+	DSP crosslinked_Control	5	66.3	10.192	3.32009	5.02013	10.4235	P14854	P14854	Cytochrome c oxidase subunit 6B1	COX6B1
26.9018	25.1822	25.4319	20.32	21.2557	20.9364	cellular component organization;cellular membrane organization;cellular process;membrane fusion;membrane organization;mitochondrion organization;organelle fusion;organelle organization	+	Known mitochondrial	+	DSP crosslinked_Control	8	28.6	26.152	2.93883	5.00125	8.29883	Q9NX63	Q9NX63	MICOS complex subunit MIC19	CHCHD3
28.4302	27.47	27.7682	24.4314	23.1585	21.1299	anatomical structure development;anatomical structure morphogenesis;biological regulation;biosynthetic process;cellular metabolic process;cellular nitrogen compound metabolic process;cellular process;developmental process;macromolecule metabolic process;metabolic process;multicellular organismal process;nitrogen compound metabolic process;nucleobase-containing compound metabolic process;primary m…	+	Known mitochondrial	+	DSP crosslinked_Control	15	54.8	33.296	2.1166	4.98288	4.97112	Q99623	Q99623	Prohibitin-2	PHB2
27.3277	25.9546	25.6295	21.6378	20.8762	21.8215		+	Known mitochondrial	+	DSP crosslinked_Control	3	25.2	15.512	2.91085	4.85877	8.15981	Q9Y6H1;Q5T1J5	Q9Y6H1;Q5T1J5	Coiled-coil-helix-coiled-coil-helix domain-containing protein 2;Putative coiled-coil-helix-coiled-coil-helix domain-containing protein CHCHD2P9, mitochondrial	CHCHD2;CHCHD2P9
27.0339	25.1733	25.3966	19.9697	21.0682	22.3617	biological regulation;cell growth;cellular process;growth	+	Known mitochondrial	+	DSP crosslinked_Control	6	34.7	71.368	2.19274	4.73479	5.22262	Q9NVI7	Q9NVI7	ATPase family AAA domain-containing protein 3A	ATAD3A
26.5914	25.1678	25.505	20.6016	20.9933	22.0627	alcohol metabolic process;biosynthetic process;carbohydrate metabolic process;cellular metabolic process;cellular nitrogen compound metabolic process;cellular process;establishment of localization;heterocycle metabolic process;metabolic process;nitrogen compound metabolic process;nucleobase-containing compound metabolic process;nucleobase-containing small molecule metabolic process;nucleotide met…	+	Known mitochondrial	+	DSP crosslinked_Control	26	43.3	74.175	2.75105	4.53553	7.4053	Q9UJS0;O75746	Q9UJS0	Calcium-binding mitochondrial carrier protein Aralar2	SLC25A13
25.1361	24.0815	24.0759	20.0339	20.6214	20.8913		+	Known mitochondrial	+	DSP crosslinked_Control	5	26.8	25.709	3.07811	3.91566	9.0236	Q96BR5	Q96BR5	Cytochrome c oxidase assembly factor 7	COA7
26.0928	25.0537	24.5571	21.1626	20.8479	22.0086		+	Known mitochondrial	+	DSP crosslinked_Control	4	58.6	10.134	2.62016	3.89481	6.83412	Q9NYJ1	Q9NYJ1	Cytochrome c oxidase assembly factor 4 homolog, mitochondrial	COA4
25.6203	24.1541	24.5256	20.8832	21.3102	20.6448	biological regulation	+	Known mitochondrial	+	DSP crosslinked_Control	9	36.8	27.131	2.86565	3.82059	7.93966	Q9NR28	Q9NR28	Diablo homolog, mitochondrial	DIABLO
25.6393	24.788	25.0171	22.3082	21.0898	20.7077	cellular process;response to abiotic stimulus;response to heat;response to stimulus;response to stress	+	Known mitochondrial	+	DSP crosslinked_Control	20	35.5	78.728	2.64237	3.77955	6.92821	Q9H078	Q9H078	Caseinolytic peptidase B protein homolog	CLPB
25.8137	24.5458	24.4571	21.564	21.4151	20.6293	cellular component assembly;cellular component organization;cellular metabolic process;cellular process;cellular respiration;generation of precursor metabolites and energy;macromolecular complex assembly;metabolic process;oxidative phosphorylation;phosphorus metabolic process;protein complex assembly;small molecule metabolic process	+	Known mitochondrial	+	DSP crosslinked_Control	3	29.7	10.739	2.68464	3.73609	7.11046	P07919	P07919	Cytochrome b-c1 complex subunit 6, mitochondrial	UQCRH
25.4445	23.7618	24.1312	19.4152	20.8221	22.2836	aging;anatomical structure formation involved in morphogenesis;biological regulation;cell death;cellular component movement;cellular component organization;cellular membrane organization;cellular process;cytoskeleton-dependent intracellular transport;death;developmental process;establishment of localization;membrane fusion;membrane organization;mitochondrion organization;multicellular organismal …		Known mitochondrial	+	DSP crosslinked_Control	25	29.6	111.63	1.68355	3.60549	3.7062	O60313	O60313	Dynamin-like 120 kDa protein, mitochondrial;Dynamin-like 120 kDa protein, form S1	OPA1
25.2422	24.0917	24.4877	21.3347	20.3125	21.5416	amine metabolic process;cellular amino acid metabolic process;cellular ketone metabolic process;cellular metabolic process;cellular nitrogen compound metabolic process;cellular process;metabolic process;nitrogen compound metabolic process;organic acid metabolic process;primary metabolic process;small molecule metabolic process	+	Known mitochondrial	+	DSP crosslinked_Control	11	32.1	47.036	2.65317	3.54429	6.97438	P12532;P17540	P12532	Creatine kinase U-type, mitochondrial	CKMT1A
26.2785	24.3722	25.0867	21.3371	22.0943	22.554	biological regulation;catabolic process;cellular metabolic process;cellular nitrogen compound metabolic process;cellular process;DNA metabolic process;generation of precursor metabolites and energy;macromolecule metabolic process;metabolic process;nitrogen compound metabolic process;nucleobase-containing compound metabolic process;primary metabolic process;small molecule metabolic process	+	Known mitochondrial	+	DSP crosslinked_Control	7	56.2	11.749	2.10345	3.2507	4.92864	P99999;CON__P62894	P99999	Cytochrome c	CYCS
24.5966	24.4176	24.3262	23.3007	20.5732	20.2908	alcohol metabolic process;amine metabolic process;biosynthetic process;carbohydrate metabolic process;catabolic process;cellular amino acid metabolic process;cellular ketone metabolic process;cellular metabolic process;cellular nitrogen compound metabolic process;cellular process;establishment of localization;heterocycle metabolic process;lipid transport;metabolic process;nitrogen compound metabo…	+	Known mitochondrial	+	DSP crosslinked_Control	17	41.4	47.517	1.47292	3.05856	3.17619	P00505	P00505	Aspartate aminotransferase, mitochondrial	GOT2
24.1475	23.419	23.4227	20.6505	20.0171	21.3105	carbohydrate metabolic process;catabolic process;cellular metabolic process;cellular process;cofactor metabolic process;metabolic process;primary metabolic process;small molecule metabolic process	+	Known mitochondrial	+	DSP crosslinked_Control	10	20.8	51.712	2.59985	3.00374	6.74903	O75390	O75390	Citrate synthase, mitochondrial	CS
25.5398	24.1227	24.1753	21.3578	21.5125	22.6851		+	Known mitochondrial	+	DSP crosslinked_Control	6	59	16.62	1.93779	2.76083	4.41674	Q4VC31	Q4VC31	Coiled-coil domain-containing protein 58	CCDC58
24.4449	22.7956	23.0269	20.8793	20.2334	20.9813		+	Known mitochondrial	+	DSP crosslinked_Control	4	31.2	72.572	2.06668	2.72445	4.81139	Q5T9A4	Q5T9A4	ATPase family AAA domain-containing protein 3B	ATAD3B
24.3206	25.1471	24.624	23.6357	21.3038	21.1633	biological regulation;biosynthetic process;cellular component movement;cellular metabolic process;cellular nitrogen compound metabolic process;cellular process;cytoskeleton-dependent intracellular transport;establishment of localization;macromolecule metabolic process;metabolic process;nitrogen compound metabolic process;nucleobase-containing compound metabolic process;nucleobase-containing compo…	+	Known mitochondrial	+	DSP crosslinked_Control	42	36.4	157.9	1.47468	2.66297	3.18043	P42704	P42704	Leucine-rich PPR motif-containing protein, mitochondrial	LRPPRC
24.1217	22.9409	23.5698	20.7797	20.5498	22.1007	biological regulation;catabolic process;cell death;cell differentiation;cellular component assembly;cellular component organization;cellular homeostasis;cellular macromolecular complex assembly;cellular metabolic process;cellular nitrogen compound metabolic process;cellular process;death;developmental process;DNA metabolic process;homeostatic process;macromolecular complex assembly;macromolecule …	+	Known mitochondrial	+	DSP crosslinked_Control	10	15.8	66.9	1.81345	2.40074	4.05867	O95831	O95831	Apoptosis-inducing factor 1, mitochondrial	AIFM1
22.5157	24.1236	23.5372	21.6318	20.278	21.2046	biosynthetic process;catabolic process;cellular ketone metabolic process;cellular lipid metabolic process;cellular metabolic process;cellular process;lipid metabolic process;metabolic process;organic acid metabolic process;primary metabolic process;small molecule metabolic process	+	Known mitochondrial	+	DSP crosslinked_Control	10	22.2	51.294	1.72523	2.35404	3.817	P55084	P55084	Trifunctional enzyme subunit beta, mitochondrial;3-ketoacyl-CoA thiolase	HADHB
23.7092	22.8324	22.9333	20.6381	20.6202	21.4928	cellular metabolic process;cellular process;generation of precursor metabolites and energy;metabolic process	+	Known mitochondrial	+	DSP crosslinked_Control	3	9.4	40.094	2.30442	2.24128	5.60965	Q00325	Q00325	Phosphate carrier protein, mitochondrial	SLC25A3
23.6644	22.5017	22.4358	20.65	20.417	21.1081		+	Known mitochondrial	+	DSP crosslinked_Control	4	38.2	12.395	2.05843	2.14228	4.78536	Q9BSY4	Q9BSY4	Coiled-coil-helix-coiled-coil-helix domain-containing protein 5	CHCHD5
23.9996	22.7339	23.1453	22.058	20.693	20.9076	biological regulation;catabolic process;cellular metabolic process;cellular nitrogen compound metabolic process;cellular process;developmental process;DNA metabolic process;embryo development;macromolecule metabolic process;metabolic process;nitrogen compound metabolic process;nucleobase-containing compound metabolic process;primary metabolic process;response to chemical stimulus;response to stim…	+	Known mitochondrial	+	DSP crosslinked_Control	6	26.9	32.62	1.67115	2.07338	3.67363	Q14249	Q14249	Endonuclease G, mitochondrial	ENDOG
23.2184	21.8425	22.4358	19.963	21.037	20.3541	anatomical structure development;behavior;biological regulation;cell development;cellular component organization;cellular lipid metabolic process;cellular metabolic process;cellular process;developmental process;lipid metabolic process;macromolecule metabolic process;metabolic process;mitochondrion organization;multicellular organismal process;organelle organization;primary metabolic process;prot…	+	Known mitochondrial	+	DSP crosslinked_Control	5	13.1	48.84	1.80564	2.04751	4.03688	O43464;P83110	O43464	Serine protease HTRA2, mitochondrial	HTRA2
24.1071	23.3126	23.3613	21.1838	22.001	21.4555	biological regulation;biosynthetic process;cell activation;cellular component assembly;cellular component organization;cellular homeostasis;cellular ion homeostasis;cellular metabolic process;cellular nitrogen compound metabolic process;cellular process;cytokine production;establishment of localization;heterocycle metabolic process;homeostatic process;hydrogen transport;immune system process;ion …	+	Known mitochondrial	+	DSP crosslinked_Control	7	29.2	38.534	2.36166	2.04689	5.81683	Q9UJZ1	Q9UJZ1	Stomatin-like protein 2, mitochondrial	STOML2
23.3617	23.2365	23.0323	22.4739	20.8253	20.4942	biological regulation;catabolic process;cellular ketone metabolic process;cellular metabolic process;cellular process;cofactor metabolic process;homeostatic process;metabolic process;organic acid metabolic process;small molecule metabolic process		Known mitochondrial	+	DSP crosslinked_Control	9	27.1	54.636	1.45771	1.94574	3.13973	P07954	P07954	Fumarate hydratase, mitochondrial	FH
24.0909	22.6907	22.6194	20.7487	21.4848	21.5003	biological regulation;cellular process;regulation of cell cycle;response to DNA damage stimulus;response to stimulus;response to stress;signal transduction	+	Known mitochondrial	+	DSP crosslinked_Control	2	27.6	8.7858	1.60462	1.88908	3.5019	O43715	O43715	TP53-regulated inhibitor of apoptosis 1	TRIAP1
25.8548	25.6783	25.2658	25.4349	24.3464	21.4547	biological regulation;cellular metabolic process;cellular process;establishment of localization;macromolecule metabolic process;metabolic process;nuclear transport;nucleocytoplasmic transport;primary metabolic process;protein folding;protein metabolic process;protein targeting;protein transport;transport	+	Known mitochondrial			23	41.8	73.68	0.704881	1.8543	1.54474	P38646	P38646	Stress-70 protein, mitochondrial	HSPA9
21.7973	23.3051	23.1686	20.4996	20.9436	21.4054	amine metabolic process;anatomical structure morphogenesis;biological regulation;catabolic process;cell maturation;cellular amino acid metabolic process;cellular homeostasis;cellular ion homeostasis;cellular ketone metabolic process;cellular metabolic process;cellular nitrogen compound metabolic process;cellular process;cofactor metabolic process;developmental maturation;developmental process;gen…	+	Known mitochondrial	+	DSP crosslinked_Control	11	30.6	54.177	1.52338	1.80742	3.29887	P09622	P09622	Dihydrolipoyl dehydrogenase, mitochondrial	DLD
23.8449	22.4727	22.7046	21.3761	20.9253	21.4403	cellular component organization;cellular membrane organization;cellular metabolic process;cellular process;establishment of localization;macromolecule metabolic process;membrane organization;metabolic process;mitochondrion organization;organelle organization;primary metabolic process;protein metabolic process;protein targeting;protein transport;transport	+	Known mitochondrial	+	DSP crosslinked_Control	10	22	51.976	1.74762	1.76017	3.87742	Q9Y512	Q9Y512	Sorting and assembly machinery component 50 homolog	SAMM50
23.4674	22.4836	22.6585	20.6077	22.3462	20.5472	cell proliferation;cellular component organization;cellular process;macromolecule metabolic process;metabolic process;mitochondrion organization;organelle organization;primary metabolic process;protein metabolic process;proteolysis;proteolysis involved in cellular protein catabolic process	+	Known mitochondrial			13	20.2	86.454	1.20673	1.70281	2.56777	Q96TA2	Q96TA2	ATP-dependent zinc metalloprotease YME1L1	YME1L1
26.2081	26.6121	26.1119	24.7643	24.3223	24.7459	anatomical structure formation involved in morphogenesis;biological regulation;biosynthetic process;cellular homeostasis;cellular ion homeostasis;cellular metabolic process;cellular nitrogen compound metabolic process;cellular process;developmental process;establishment of localization;generation of precursor metabolites and energy;heterocycle metabolic process;homeostatic process;hydrogen transp…	+	Known mitochondrial	+	DSP crosslinked_Control	20	58.4	56.559	2.89345	1.69984	8.07445	P06576	P06576	ATP synthase subunit beta, mitochondrial	ATP5B
23.9706	22.7065	23.2006	20.4794	22.335	22.0754		+	Known mitochondrial			3	32	14.116	1.13833	1.66261	2.42052	Q5JTJ3	Q5JTJ3	Cytochrome c oxidase assembly factor 6 homolog	COA6
23.5223	22.1918	22.6083	19.6977	21.8456	21.9242	cellular metabolic process;cellular process;generation of precursor metabolites and energy;metabolic process;response to chemical stimulus;response to external stimulus;response to extracellular stimulus;response to stimulus;small molecule metabolic process	+	Known mitochondrial			5	30.8	19.576	0.911856	1.61831	1.95323	P13073	P13073	Cytochrome c oxidase subunit 4 isoform 1, mitochondrial	COX4I1
24.0315	21.9706	22.4303	21.2589	21.2433	21.2849	establishment of localization;transport	+	Known mitochondrial			5	20.1	33.331	1.16554	1.54846	2.47869	Q9Y6C9	Q9Y6C9	Mitochondrial carrier homolog 2	MTCH2
24.7552	23.7699	23.6364	23.0742	23.1437	21.5435	biosynthetic process;catabolic process;cellular component disassembly;cellular component organization;cellular metabolic process;cellular nitrogen compound metabolic process;cellular process;establishment of localization;macromolecule metabolic process;metabolic process;mRNA metabolic process;nitrogen compound metabolic process;nucleobase-containing compound metabolic process;primary metabolic pr…		Predicted mitochondrial			9	49.5	24.205	1.09428	1.46673	2.32735	P62241	P62241	40S ribosomal protein S8	RPS8
24.2432	22.3822	22.6895	22.04	20.3647	22.7242	cellular component organization;cellular membrane organization;cellular process;establishment of localization;membrane organization;mitochondrion organization;organelle organization;protein targeting;protein transport;transport	+	Known mitochondrial			7	24.1	39.646	0.701494	1.39539	1.53813	Q3ZCQ8	Q3ZCQ8	Mitochondrial import inner membrane translocase subunit TIM50	TIMM50
23.2119	21.7569	21.8079	19.7376	21.0004	21.8845	biological regulation;cell differentiation;cellular process;developmental process;establishment of localization;homeostatic process;ion transport;transport	+	Known mitochondrial			6	23.3	35.619	0.817309	1.3847	1.76516	Q9H9B4	Q9H9B4	Sideroflexin-1	SFXN1
23.1576	21.957	22.1909	21.4618	21.1856	20.9582	biosynthetic process;cellular aromatic compound metabolic process;cellular metabolic process;cellular nitrogen compound metabolic process;cellular process;cofactor metabolic process;heterocycle metabolic process;metabolic process;nitrogen compound metabolic process;pigment metabolic process;response to chemical stimulus;response to stimulus;small molecule metabolic process	+	Known mitochondrial	+	DSP crosslinked_Control	6	18.3	50.151	1.44953	1.2333	3.12021	P36551	P36551	Oxygen-dependent coproporphyrinogen-III oxidase, mitochondrial	CPOX
20.7	23.2598	23.1002	21.3548	20.9308	21.3605	biological regulation;biosynthetic process;cell death;cellular component assembly;cellular component organization;cellular macromolecular complex assembly;cellular metabolic process;cellular nitrogen compound metabolic process;cellular process;death;immune system process;interspecies interaction between organisms;macromolecular complex assembly;macromolecule metabolic process;metabolic process;mR…	+	Known mitochondrial			6	31.6	31.362	0.607287	1.13798	1.35459	Q07021	Q07021	Complement component 1 Q subcomponent-binding protein, mitochondrial	C1QBP
22.0322	21.6916	22.2543	22.1318	20.5226	19.948	biological regulation;carbohydrate metabolic process;cellular homeostasis;cellular metabolic process;cellular process;establishment of localization;glycerol ether metabolic process;homeostatic process;immune system process;macromolecule metabolic process;macromolecule modification;metabolic process;nuclear transport;nucleocytoplasmic transport;peptidyl-amino acid modification;primary metabolic pr…		Predicted mitochondrial			11	25.3	56.782	0.768993	1.12526	1.67011	P30101	P30101	Protein disulfide-isomerase A3	PDIA3
22.9139	21.1169	21.4752	19.5374	20.8421	22.0145	biological regulation;cellular component assembly;cellular component organization;cellular homeostasis;cellular ion homeostasis;cellular macromolecular complex assembly;cellular metabolic process;cellular process;establishment of localization;generation of precursor metabolites and energy;homeostatic process;ion transport;macromolecular complex assembly;metabolic process;protein complex assembly;…	+	Known mitochondrial			4	16.3	33.814	0.502892	1.03733	1.15025	O75880	O75880	Protein SCO1 homolog, mitochondrial	SCO1
26.1651	26.1812	25.8061	25.2675	25.2068	24.6026	biological regulation;biosynthetic process;cellular metabolic process;cellular nitrogen compound metabolic process;cellular process;developmental process;embryo development;establishment of localization;generation of precursor metabolites and energy;heterocycle metabolic process;hydrogen transport;ion transport;lipid metabolic process;metabolic process;nitrogen compound metabolic process;nucleoba…	+	Known mitochondrial	+	DSP crosslinked_Control	22	45	59.75	1.85784	1.02517	4.18408	P25705	P25705	ATP synthase subunit alpha, mitochondrial	ATP5A1
26.7888	26.7101	26.4237	26.3164	25.7768	24.8915	biological regulation;cell activation;cell proliferation;cellular component assembly;cellular component organization;cellular macromolecular complex assembly;cellular metabolic process;cellular nitrogen compound metabolic process;cellular process;cytokine production;DNA metabolic process;DNA recombination;immune system process;interspecies interaction between organisms;macromolecular complex asse…	+	Known mitochondrial			30	52.4	61.054	1.07072	0.979328	2.27801	P10809	P10809	60 kDa heat shock protein, mitochondrial	HSPD1
23.8131	22.1634	22.1027	22.7309	21.6908	20.7944	biological regulation;biosynthetic process;cellular homeostasis;cellular ketone metabolic process;cellular lipid metabolic process;cellular metabolic process;cellular process;establishment of localization;homeostatic process;lipid metabolic process;metabolic process;organic acid metabolic process;primary metabolic process;secretion;small molecule metabolic process;transport	+	Known mitochondrial			5	16.4	41.943	0.530867	0.95438	1.20525	Q9H7Z7	Q9H7Z7	Prostaglandin E synthase 2;Prostaglandin E synthase 2 truncated form	PTGES2
20.3962	23.4994	23.2308	22.2179	21.093	21.0173	anatomical structure morphogenesis;biological regulation;biosynthetic process;cellular component morphogenesis;cellular component organization;cellular metabolic process;cellular nitrogen compound metabolic process;cellular process;developmental process;DNA metabolic process;DNA replication;macromolecule metabolic process;metabolic process;mitochondrion organization;nitrogen compound metabolic pr…	+	Known mitochondrial			5	39.2	17.259	0.365579	0.932692	0.87505	Q04837	Q04837	Single-stranded DNA-binding protein, mitochondrial	SSBP1
23.1176	21.5572	21.599	21.1889	21.3349	20.9536		+	Known mitochondrial			5	16.9	35.808	0.822258	0.932145	1.77493	Q96DB5	Q96DB5	Regulator of microtubule dynamics protein 1	RMDN1
23.1667	21.6599	22.0323	21.6419	20.7669	21.6665		+	Known mitochondrial			5	17.6	27.626	0.791642	0.927895	1.7146	Q9NX40	Q9NX40	OCIA domain-containing protein 1	OCIAD1
23.9338	23.0516	23.5562	24.513	22.3923	20.9578	amine metabolic process;anatomical structure development;biosynthetic process;catabolic process;cellular amino acid metabolic process;cellular component assembly;cellular component organization;cellular ketone body metabolic process;cellular ketone metabolic process;cellular lipid metabolic process;cellular metabolic process;cellular nitrogen compound metabolic process;cellular process;developmen…	+	Known mitochondrial			13	39.8	45.199	0.348191	0.892822	0.839271	P24752	P24752	Acetyl-CoA acetyltransferase, mitochondrial	ACAT1
23.242	23.1864	23.084	23.4931	22.219	21.2205	anatomical structure development;biological regulation;catabolic process;cell differentiation;cellular component organization;cellular homeostasis;cellular ion homeostasis;cellular metabolic process;cellular process;developmental process;homeostatic process;metabolic process;mitochondrion organization;organelle organization;response to biotic stimulus;response to chemical stimulus;response to oxi…	+	Known mitochondrial			5	19.9	27.692	0.581572	0.859963	1.30444	P30048	P30048	Thioredoxin-dependent peroxide reductase, mitochondrial	PRDX3
20.9416	23.3505	22.9569	21.4676	21.3977	21.8078	aging;biological regulation;catabolic process;cellular component assembly;cellular component organization;cellular macromolecular complex assembly;cellular metabolic process;cellular nitrogen compound metabolic process;cellular process;developmental process;DNA metabolic process;macromolecular complex assembly;macromolecule metabolic process;metabolic process;nitrogen compound metabolic process;n…	+	Known mitochondrial			18	25.5	106.49	0.494958	0.85863	1.13461	P36776	P36776	Lon protease homolog, mitochondrial	LONP1
25.0604	23.9374	24.066	24.6865	24.5987	21.3021	biological regulation;cellular metabolic process;cellular process;chromosome segregation;energy reserve metabolic process;generation of precursor metabolites and energy;interspecies interaction between organisms;metabolic process;multi-organism process;regulation of transport;small molecule metabolic process;viral reproduction	+	Known mitochondrial			4	31.5	32.852	0.284812	0.825518	0.706202	P05141;Q9H0C2	P05141	ADP/ATP translocase 2;ADP/ATP translocase 2, N-terminally processed	SLC25A5
21.214	22.2628	21.9893	20.7691	21.1166	21.3524	alcohol metabolic process;biological regulation;biosynthetic process;carbohydrate metabolic process;catabolic process;cellular ketone metabolic process;cellular metabolic process;cellular process;cofactor metabolic process;generation of precursor metabolites and energy;metabolic process;organic acid metabolic process;primary metabolic process;small molecule metabolic process	+	Known mitochondrial			8	19.2	43.295	0.975103	0.742671	2.08102	P08559;P29803	P08559	Pyruvate dehydrogenase E1 component subunit alpha, somatic form, mitochondrial	PDHA1
22.8352	21.1175	20.6491	19.9211	20.9625	21.5814	biological adhesion;cell adhesion;cellular metabolic process;cellular process;establishment of localization;macromolecule metabolic process;metabolic process;primary metabolic process;protein metabolic process;protein targeting;protein transport;transport	+	Known mitochondrial			3	30.1	11.586	0.361218	0.712264	0.866103	Q9Y5J6	Q9Y5J6	Mitochondrial import inner membrane translocase subunit Tim10 B	TIMM10B
23.2226	22.5774	22.5042	22.3343	21.6989	22.1683	biological regulation;catabolic process;cellular component assembly;cellular component organization;cellular metabolic process;cellular process;cytoskeleton organization;establishment of localization;immune system process;macromolecule metabolic process;metabolic process;organelle organization;primary metabolic process;protein folding;protein metabolic process;protein transport;proteolysis;proteo…		Predicted mitochondrial			12	21.3	92.468	1.10919	0.700918	2.35875	P14625;Q58FF3	P14625	Endoplasmin	HSP90B1
22.8307	21.2475	21.582	21.1515	21.7084	20.9126	cellular process;establishment of localization;transmembrane transport;transport	+	Known mitochondrial			6	14.9	53.354	0.514565	0.629275	1.17323	Q6NUK1	Q6NUK1	Calcium-binding mitochondrial carrier protein SCaMC-1	SLC25A24
19.6787	22.3901	22.9452	21.2847	20.5982	21.3534	cellular metabolic process;cellular process;generation of precursor metabolites and energy;metabolic process;small molecule metabolic process	+	Known mitochondrial			4	23.3	25.565	0.222965	0.592573	0.571145	P00403	P00403	Cytochrome c oxidase subunit 2	MT-CO2
22.3052	20.9947	21.1699	20.2648	20.8274	21.6173		+	Known mitochondrial			4	13.6	45.811	0.443753	0.586741	1.03303	Q96ER9	Q96ER9	Coiled-coil domain-containing protein 51	CCDC51
19.4944	23.2752	22.9392	21.1569	21.7874	21.0444	amine metabolic process;biosynthetic process;cellular amino acid metabolic process;cellular ketone metabolic process;cellular metabolic process;cellular nitrogen compound metabolic process;cellular process;heterocycle metabolic process;metabolic process;nitrogen compound metabolic process;organic acid metabolic process;primary metabolic process;small molecule metabolic process	+	Known mitochondrial			17	23.3	87.301	0.176936	0.573397	0.466136	P54886	P54886	Delta-1-pyrroline-5-carboxylate synthase;Glutamate 5-kinase;Gamma-glutamyl phosphate reductase	ALDH18A1
22.7747	22.2422	21.7756	23.1813	21.0753	20.851	cellular metabolic process;cellular process;macromolecule metabolic process;metabolic process;primary metabolic process;protein folding;protein metabolic process;response to chemical stimulus;response to oxidative stress;response to stimulus;response to stress		Known mitochondrial			11	18.2	80.109	0.284335	0.561585	0.705181	Q12931	Q12931	Heat shock protein 75 kDa, mitochondrial	TRAP1
21.6053	21.1462	20.7509	20.612	20.3726	20.8953	biological regulation;cellular metabolic process;cellular process;generation of precursor metabolites and energy;metabolic process;small molecule metabolic process	+	Known mitochondrial			4	18.9	30.241	0.869583	0.540881	1.86875	O75489	O75489	NADH dehydrogenase [ubiquinone] iron-sulfur protein 3, mitochondrial	NDUFS3
22.9273	21.4625	21.8236	20.7213	21.2958	22.5998		+	Known mitochondrial			4	24.7	16.953	0.305628	0.532183	0.750417	Q56VL3	Q56VL3	OCIA domain-containing protein 2	OCIAD2
22.3538	20.764	20.8327	20.2797	21.0435	21.0543	cellular component assembly;cellular component organization;cellular macromolecular complex assembly;cellular process;cytokinesis;macromolecular complex assembly;protein complex assembly;protein complex biogenesis	+	Known mitochondrial			4	12.4	42.456	0.380718	0.52435	0.905989	Q6DKK2	Q6DKK2	Tetratricopeptide repeat protein 19, mitochondrial	TTC19
22.7516	20.9509	21.2392	20.5153	21.7035	21.2227		+	Known mitochondrial			4	12.4	43.113	0.311022	0.500067	0.761788	Q9NQZ5	Q9NQZ5	StAR-related lipid transfer protein 7, mitochondrial	STARD7
22.5348	20.9961	21.1124	21.3427	20.7258	21.0928		+	Known mitochondrial			5	11.4	63.277	0.396953	0.494003	0.938965	Q9NVH1	Q9NVH1	DnaJ homolog subfamily C member 11	DNAJC11
21.92	21.1302	21.2713	20.9758	20.4669	21.4762	cellular metabolic process;cellular process;establishment of localization;macromolecule metabolic process;metabolic process;primary metabolic process;protein metabolic process;protein targeting;protein transport;transport	+	Known mitochondrial			7	15	67.454	0.544475	0.467536	1.23192	O94826	O94826	Mitochondrial import receptor subunit TOM70	TOMM70A
20.7502	21.2882	21.3606	21.0131	20.6735	20.3207	biological regulation;cellular component organization;cellular process;regulation of organelle organization;regulation of protein modification process;response to chemical stimulus;response to stimulus		Known mitochondrial			8	42.7	31.62	0.76979	0.463938	1.67168	O00165	O00165	HCLS1-associated protein X-1	HAX1
21.142	23.3561	22.9623	22.2272	21.5994	22.2427	amine metabolic process;biological regulation;biosynthetic process;cellular amino acid metabolic process;cellular aromatic compound metabolic process;cellular component assembly;cellular component organization;cellular ketone metabolic process;cellular metabolic process;cellular nitrogen compound metabolic process;cellular process;cofactor metabolic process;heterocycle metabolic process;macromole…	+	Known mitochondrial			14	35.9	55.992	0.258415	0.46366	0.649288	P34897	P34897	Serine hydroxymethyltransferase, mitochondrial	SHMT2
22.5196	22.2323	21.9452	21.5559	21.984	21.7844	alcohol metabolic process;biological regulation;biosynthetic process;carbohydrate metabolic process;catabolic process;cellular metabolic process;cellular process;metabolic process;neurotransmitter metabolic process;primary metabolic process;small molecule metabolic process;xenobiotic metabolic process	+	Known mitochondrial			10	23.4	56.381	1.039	0.457594	2.2121	P05091;P00352	P05091	Aldehyde dehydrogenase, mitochondrial	ALDH2
22.4365	21.9375	21.7285	21.8319	21.9054	21.0887	amine metabolic process;biological regulation;cellular amino acid metabolic process;cellular ketone metabolic process;cellular metabolic process;cellular nitrogen compound metabolic process;cellular process;macromolecule metabolic process;metabolic process;nitrogen compound metabolic process;nucleobase-containing compound metabolic process;organic acid metabolic process;primary metabolic process;…	+	Known mitochondrial			6	7.7	113.79	0.564292	0.425533	1.27069	Q9NSE4	Q9NSE4	Isoleucine--tRNA ligase, mitochondrial	IARS2
22.0632	21.4054	21.3932	20.4546	22.4341	20.6969	biological regulation;cell death;cellular metabolic process;cellular process;death;energy reserve metabolic process;establishment of localization;generation of precursor metabolites and energy;interspecies interaction between organisms;macromolecule metabolic process;metabolic process;multi-organism process;primary metabolic process;protein metabolic process;protein targeting;protein transport;re…	+	Known mitochondrial			2	32.9	32.866	0.255581	0.425423	0.643118	P12236	P12236	ADP/ATP translocase 3;ADP/ATP translocase 3, N-terminally processed	SLC25A6
22.3918	22.5779	22.6965	23.5992	21.3762	21.4596	biosynthetic process;catabolic process;cellular ketone metabolic process;cellular lipid metabolic process;cellular metabolic process;cellular process;lipid metabolic process;metabolic process;organic acid metabolic process;primary metabolic process;response to chemical stimulus;response to drug;response to endogenous stimulus;response to stimulus;small molecule metabolic process	+	Known mitochondrial			11	19.8	82.999	0.217981	0.410395	0.559981	P40939	P40939	Trifunctional enzyme subunit alpha, mitochondrial;Long-chain enoyl-CoA hydratase;Long chain 3-hydroxyacyl-CoA dehydrogenase	HADHA
23.0607	21.5534	21.6819	21.1144	22.2827	21.7015	alcohol metabolic process;biosynthetic process;carbohydrate metabolic process;catabolic process;cellular lipid metabolic process;cellular metabolic process;cellular process;lipid metabolic process;metabolic process;phosphorus metabolic process;primary metabolic process;small molecule metabolic process	+	Known mitochondrial			11	15.7	80.852	0.271692	0.399117	0.678038	P43304	P43304	Glycerol-3-phosphate dehydrogenase, mitochondrial	GPD2
21.9263	21.3377	21.3	21.2502	20.7499	21.3991	cellular metabolic process;cellular process;generation of precursor metabolites and energy;metabolic process;small molecule metabolic process	+	Known mitochondrial			4	26.7	20.776	0.618099	0.388299	1.37565	O96000	O96000	NADH dehydrogenase [ubiquinone] 1 beta subcomplex subunit 10	NDUFB10
20.9196	21.5779	21.3035	20.6408	21.5272	20.5261	alcohol metabolic process;biological regulation;biosynthetic process;carbohydrate metabolic process;catabolic process;cellular ketone metabolic process;cellular metabolic process;cellular process;cofactor metabolic process;metabolic process;organic acid metabolic process;primary metabolic process;small molecule metabolic process	+	Known mitochondrial			5	19.5	39.233	0.426497	0.368936	0.998504	P11177	P11177	Pyruvate dehydrogenase E1 component subunit beta, mitochondrial	PDHB
21.2869	21.4587	21.7582	21.47	20.8807	21.078	cellular metabolic process;cellular process;establishment of localization;ion transport;macromolecule metabolic process;metabolic process;primary metabolic process;protein metabolic process;protein targeting;protein transport;transport	+	Known mitochondrial			5	23.5	37.893	0.743195	0.358355	1.61958	O96008	O96008	Mitochondrial import receptor subunit TOM40 homolog	TOMM40
23.7572	22.5253	23.1005	23.9346	23.6714	20.7393	biological regulation	+	Known mitochondrial			9	42.5	31.566	0.115965	0.345887	0.319045	P45880	P45880	Voltage-dependent anion-selective channel protein 2	VDAC2
24.0325	23.0361	23.2006	23.7373	23.4508	22.2187	amine metabolic process;biological regulation;cellular amino acid metabolic process;cellular component organization;cellular homeostasis;cellular ketone metabolic process;cellular metabolic process;cellular nitrogen compound metabolic process;cellular process;extracellular matrix organization;extracellular structure organization;glycerol ether metabolic process;heterocycle metabolic process;homeo…	+	Known mitochondrial			19	37.8	57.116	0.197915	0.287458	0.514549	P07237	P07237	Protein disulfide-isomerase	P4HB
25.1104	24.8482	24.6026	25.4252	24.6763	23.695	catabolic process;cellular metabolic process;cellular nitrogen compound metabolic process;cellular process;heterocycle metabolic process;metabolic process;nitrogen compound metabolic process;nucleobase-containing compound catabolic process;nucleobase-containing compound metabolic process;nucleobase-containing small molecule metabolic process;nucleotide metabolic process;primary metabolic process;…	+	Known mitochondrial			18	49.1	49.541	0.186503	0.2549	0.488335	P49411	P49411	Elongation factor Tu, mitochondrial	TUFM
22.301	20.9154	21.2831	22.1549	20.6911	21.1456	establishment of localization;lipid transport;transport	+	Known mitochondrial			3	18.2	22.284	0.101597	0.169364	0.282727	Q9BUR5	Q9BUR5	Apolipoprotein O	APOO
20.1104	23.2657	23.4651	22.5023	22.4133	21.4316	amine metabolic process;catabolic process;cellular amino acid metabolic process;cellular ketone metabolic process;cellular metabolic process;cellular nitrogen compound metabolic process;cellular process;lipid metabolic process;macromolecule metabolic process;metabolic process;nitrogen compound metabolic process;nucleobase-containing compound metabolic process;organic acid metabolic process;primar…	+	Known mitochondrial			12	78.9	26.923	0.0496033	0.164686	0.144538	Q99714	Q99714	3-hydroxyacyl-CoA dehydrogenase type-2	HSD17B10
23.1615	21.9071	21.8251	23.9379	21.2206	21.3015	biosynthetic process;catabolic process;cellular component disassembly;cellular component organization;cellular metabolic process;cellular nitrogen compound metabolic process;cellular process;establishment of localization;macromolecule metabolic process;metabolic process;mRNA metabolic process;nitrogen compound metabolic process;nucleobase-containing compound metabolic process;primary metabolic pr…	+	Predicted mitochondrial			7	42.8	17.718	0.0500397	0.144559	0.145749	P62269	P62269	40S ribosomal protein S18	RPS18
20.5155	21.6246	21.3137	19.9621	21.9991	21.0599	biosynthetic process;cellular metabolic process;cellular process;macromolecule metabolic process;metabolic process;primary metabolic process;protein metabolic process;translation	+	Known mitochondrial			7	29.4	33.419	0.0750933	0.144255	0.213724	Q9P015	Q9P015	39S ribosomal protein L15, mitochondrial	MRPL15
23.8783	23.1849	23.5409	23.9698	23.1977	23.0459	behavior;cell communication;cell death;cell-cell signaling;cellular process;death;interspecies interaction between organisms;multicellular organismal process;multi-organism process;neurological system process;response to stimulus;response to stress;signaling	+	Known mitochondrial			10	49.5	30.772	0.137799	0.130211	0.372938	P21796	P21796	Voltage-dependent anion-selective channel protein 1	VDAC1
19.1769	21.363	21.7417	20.6618	20.3438	20.92	cellular metabolic process;cellular process;cellular respiration;generation of precursor metabolites and energy;macromolecule metabolic process;metabolic process;oxidative phosphorylation;phosphorus metabolic process;primary metabolic process;protein metabolic process;proteolysis;small molecule metabolic process	+	Known mitochondrial			7	21.4	48.442	0.0498874	0.118661	0.145326	P22695	P22695	Cytochrome b-c1 complex subunit 2, mitochondrial	UQCRC2
21.1463	21.31	21.2431	20.757	21.7354	20.8721	cellular metabolic process;cellular process;establishment of localization;macromolecule metabolic process;metabolic process;primary metabolic process;protein metabolic process;protein targeting;protein transport;proteolysis;transport	+	Known mitochondrial			7	14.9	54.366	0.131431	0.111629	0.357372	O75439	O75439	Mitochondrial-processing peptidase subunit beta	PMPCB
23.3918	18.4624	21.9116	22.0265	21.2808	20.1295	cellular process;establishment of localization;transmembrane transport;transport	+	Known mitochondrial			3	8.7	52.662	0.023484	0.109678	0.0702562	Q6KCM7	Q6KCM7	Calcium-binding mitochondrial carrier protein SCaMC-2	SLC25A25
19.3795	21.7519	22.122	20.7343	21.5638	20.6484	cellular component organization;cellular membrane organization;cellular metabolic process;cellular process;establishment of localization;macromolecule metabolic process;membrane organization;metabolic process;mitochondrion organization;multicellular organismal process;neurological system process;organelle organization;primary metabolic process;protein metabolic process;protein targeting;protein t…	+	Known mitochondrial			4	52.2	10.333	0.0382542	0.102279	0.112718	P62072	P62072	Mitochondrial import inner membrane translocase subunit Tim10	TIMM10
20.7512	22.4501	22.194	21.942	21.7822	21.4422	cellular ketone metabolic process;cellular metabolic process;cellular process;metabolic process;organic acid metabolic process;small molecule metabolic process		Known mitochondrial			8	15.8	65.443	0.0476022	0.0762933	0.138976	P23368;Q16798	P23368	NAD-dependent malic enzyme, mitochondrial	ME2
19.6728	21.6634	21.7577	20.8861	20.7811	21.2468		+	Known mitochondrial			3	18.8	15.641	0.0290623	0.0600128	0.0864388	Q96C01	Q96C01	Protein FAM136A	FAM136A
21.914	21.0983	20.9202	20.7516	20.5417	22.5353	anatomical structure development;anatomical structure morphogenesis;biological regulation;catabolic process;cell death;cellular component morphogenesis;cellular component organization;cellular membrane organization;cellular metabolic process;cellular process;death;developmental process;macromolecule metabolic process;membrane fusion;membrane organization;metabolic process;mitochondrion organizati…	+	Known mitochondrial			7	9	88.583	0.016362	0.0346521	0.0493236	Q9Y4W6	Q9Y4W6	AFG3-like protein 2	AFG3L2
22.2893	20.7936	20.9077	21.3167	21.4129	21.2168		+	Predicted mitochondrial			6	19	35.932	0.0100361	0.0147451	0.0304646	Q8NBN7	Q8NBN7	Retinol dehydrogenase 13	RDH13
21.3726	21.5141	21.2394	23.1208	20.7067	20.259	cellular component organization;cellular membrane organization;cellular metabolic process;cellular process;endocytosis;establishment of localization;Golgi vesicle transport;immune system process;ion transport;macromolecule metabolic process;membrane invagination;membrane organization;metabolic process;mitosis;nuclear division;organelle fission;organelle organization;protein transport;transport;ve…		Predicted mitochondrial			10	9	191.61	0.00485397	0.0132236	0.0148199	Q00610;P53675	Q00610	Clathrin heavy chain 1	CLTC
19.9356	21.4205	21.3947	20.8998	20.9763	20.8512	cellular component organization;cellular membrane organization;cellular process;membrane organization;mitochondrion organization;organelle organization	+	Known mitochondrial			7	13.5	83.353	0.0051923	0.00779788	0.0158469	O95202	O95202	LETM1 and EF-hand domain-containing protein 1, mitochondrial	LETM1
20.4475	22.4284	22.107	23.2048	20.5179	21.2902	alcohol metabolic process;biosynthetic process;cellular ketone metabolic process;cellular lipid metabolic process;cellular metabolic process;cellular process;lipid metabolic process;metabolic process;organic acid metabolic process;primary metabolic process;small molecule metabolic process	+	Known mitochondrial			9	25.7	41.924	0.00325385	-0.010025	-0.00995256	P42765	P42765	3-ketoacyl-CoA thiolase, mitochondrial	ACAA2
19.9338	20.3469	20.5315	20.6946	19.6799	20.498	biosynthetic process;catabolic process;cellular metabolic process;cellular nitrogen compound metabolic process;cellular process;establishment of localization;generation of precursor metabolites and energy;heterocycle metabolic process;hydrogen transport;ion transport;metabolic process;nitrogen compound metabolic process;nucleobase-containing compound catabolic process;nucleobase-containing compou…	+	Known mitochondrial			2	24.6	7.9331	0.0186661	-0.0200621	-0.0561298	P56385	P56385	ATP synthase subunit e, mitochondrial	ATP5I
24.4739	24.2945	24.1706	24.1335	24.4366	24.4831	biological regulation;cellular metabolic process;cellular process;macromolecule metabolic process;metabolic process;primary metabolic process;protein folding;protein metabolic process;response to chemical stimulus;response to stimulus;response to stress	+	Known mitochondrial			6	52.9	10.932	0.0968801	-0.0380503	-0.270645	P61604	P61604	10 kDa heat shock protein, mitochondrial	HSPE1
20.5341	21.2847	21.389	21.2354	20.3751	21.7278	catabolic process;cellular ketone metabolic process;cellular lipid metabolic process;cellular metabolic process;cellular process;lipid metabolic process;metabolic process;organic acid metabolic process;primary metabolic process;small molecule metabolic process	+	Known mitochondrial			4	14.9	35.816	0.0306106	-0.0434729	-0.0908987	Q13011	Q13011	Delta(3,5)-Delta(2,4)-dienoyl-CoA isomerase, mitochondrial	ECH1
19.3671	22.1923	21.8747	20.626	21.6655	21.2897	catabolic process;cell death;cellular ketone metabolic process;cellular metabolic process;cellular process;cofactor metabolic process;death;metabolic process;organic acid metabolic process;small molecule metabolic process	+	Known mitochondrial			9	14	85.424	0.0172538	-0.0490405	-0.051962	Q99798	Q99798	Aconitate hydratase, mitochondrial	ACO2
21.3691	20.851	20.766	19.9995	21.7196	21.5571	amine metabolic process;anatomical structure development;biological regulation;biosynthetic process;carbohydrate metabolic process;catabolic process;cell differentiation;cellular amino acid metabolic process;cellular ketone metabolic process;cellular lipid metabolic process;cellular metabolic process;cellular nitrogen compound metabolic process;cellular process;developmental process;energy reserv…	+	Known mitochondrial			5	15.9	46.588	0.057668	-0.0966848	-0.166755	P11310	P11310	Medium-chain specific acyl-CoA dehydrogenase, mitochondrial	ACADM
20.8908	21.107	20.8998	20.8645	20.9507	21.4568	biosynthetic process;cellular metabolic process;cellular process;macromolecule metabolic process;metabolic process;translational elongation	+	Known mitochondrial			5	8.3	83.471	0.250099	-0.124832	-0.631144	Q96RP9	Q96RP9	Elongation factor G, mitochondrial	GFM1
20.1245	21.1211	20.7818	20.92	20.637	20.8985	biological regulation;catabolic process;cellular metabolic process;cellular nitrogen compound metabolic process;cellular process;cofactor metabolic process;heterocycle metabolic process;metabolic process;nitrogen compound metabolic process;nucleobase-containing compound metabolic process;nucleobase-containing small molecule metabolic process;nucleotide metabolic process;primary metabolic process;…	+	Known mitochondrial			3	16.8	22.086	0.176743	-0.142662	-0.465685	P30044	P30044	Peroxiredoxin-5, mitochondrial	PRDX5
19.0227	22.407	21.7833	20.9193	20.9959	21.8641	amine metabolic process;catabolic process;cellular amino acid metabolic process;cellular ketone metabolic process;cellular metabolic process;cellular nitrogen compound metabolic process;cellular process;cofactor metabolic process;metabolic process;nitrogen compound metabolic process;organic acid metabolic process;primary metabolic process;small molecule metabolic process	+	Known mitochondrial			5	11.3	48.755	0.0604342	-0.188791	-0.174304	P36957	P36957	Dihydrolipoyllysine-residue succinyltransferase component of 2-oxoglutarate dehydrogenase complex, mitochondrial	DLST
21.7371	22.1373	21.4109	22.0702	22.1482	21.7805	biological regulation;biosynthetic process;cellular metabolic process;cellular nitrogen compound metabolic process;cellular process;macromolecule metabolic process;metabolic process;nitrogen compound metabolic process;nucleobase-containing compound metabolic process;primary metabolic process;RNA metabolic process	+	Known mitochondrial			5	55	12.349	0.427004	-0.237857	-0.99952	Q9GZT3	Q9GZT3	SRA stem-loop-interacting RNA-binding protein, mitochondrial	SLIRP
21.439	20.0279	20.1433	20.1312	21.0114	21.2435		+	Known mitochondrial			2	12.3	29.159	0.173303	-0.258636	-0.457649	Q6UXV4	Q6UXV4	MICOS complex subunit MIC27	APOOL
20.6356	20.4928	20.6892	20.254	21.0701	21.3537	biological regulation;cellular homeostasis;cellular ion homeostasis;cellular process;establishment of localization;homeostatic process;ion transport;transport	+	Known mitochondrial			4	12.9	49.666	0.356478	-0.286716	-0.856359	Q8IYU8	Q8IYU8	Calcium uptake protein 2, mitochondrial	MICU2
20.4001	20.9244	20.6595	21.3071	20.6815	20.9316		+	Known mitochondrial			6	19.4	46.321	0.589198	-0.312088	-1.31932	Q9BXW7	Q9BXW7	Cat eye syndrome critical region protein 5	CECR5
25.8709	25.809	25.6522	26.5322	26.1807	25.5896	alcohol metabolic process;biosynthetic process;carbohydrate metabolic process;catabolic process;cellular ketone metabolic process;cellular metabolic process;cellular nitrogen compound metabolic process;cellular process;cofactor metabolic process;heterocycle metabolic process;macromolecule metabolic process;macromolecule modification;metabolic process;nitrogen compound metabolic process;nucleobase…	+	Known mitochondrial			16	61.2	35.503	0.499947	-0.32344	-1.14445	P40926	P40926	Malate dehydrogenase, mitochondrial	MDH2
22.5701	22.3215	22.423	23.7285	23.3815	21.3522	cellular metabolic process;cellular process;cellular respiration;generation of precursor metabolites and energy;metabolic process;oxidative phosphorylation;phosphorus metabolic process;response to chemical stimulus;response to stimulus;small molecule metabolic process	+	Known mitochondrial			9	29.8	52.645	0.197564	-0.382519	-0.513745	P31930	P31930	Cytochrome b-c1 complex subunit 1, mitochondrial	UQCRC1
19.3292	21.264	21.3279	20.8956	20.3499	21.8598	biosynthetic process;cellular metabolic process;cellular nitrogen compound metabolic process;cellular process;establishment of localization;generation of precursor metabolites and energy;heterocycle metabolic process;hydrogen transport;ion transport;metabolic process;nitrogen compound metabolic process;nucleobase-containing compound metabolic process;nucleobase-containing small molecule metabolic…	+	Known mitochondrial			4	19.5	28.908	0.191269	-0.394742	-0.499317	P24539	P24539	ATP synthase F(0) complex subunit B1, mitochondrial	ATP5F1
20.1419	20.972	21.8699	20.427	22.2576	21.5222	biological regulation;biosynthetic process;catabolic process;cellular component disassembly;cellular component organization;cellular metabolic process;cellular nitrogen compound metabolic process;cellular process;establishment of localization;macromolecule metabolic process;metabolic process;mRNA metabolic process;nitrogen compound metabolic process;nucleobase-containing compound metabolic proces…		Known mitochondrial			3	12.8	26.688	0.21756	-0.407677	-0.559036	P23396	P23396	40S ribosomal protein S3	RPS3
20.2037	20.1156	19.8628	20.6276	19.816	21.0516	biological regulation;cellular component disassembly;cellular component organization;cellular metabolic process;cellular process;establishment of localization;generation of precursor metabolites and energy;metabolic process;nuclear transport;nucleocytoplasmic transport;protein targeting;protein transport;regulation of translation;small molecule metabolic process;transport	+	Known mitochondrial			2	16	16.698	0.50903	-0.437756	-1.16234	Q9P0J0	Q9P0J0	NADH dehydrogenase [ubiquinone] 1 alpha subcomplex subunit 13	NDUFA13
20.0286	21.4337	21.5083	21.2196	21.9085	21.2211	cellular metabolic process;cellular process;generation of precursor metabolites and energy;metabolic process;small molecule metabolic process	+	Known mitochondrial			3	17.3	16.762	0.359192	-0.459532	-0.86194	P20674	P20674	Cytochrome c oxidase subunit 5A, mitochondrial	COX5A
20.8303	20.6279	20.5717	20.8715	21.1816	21.3954	cellular metabolic process;cellular process;establishment of localization;macromolecule metabolic process;metabolic process;primary metabolic process;protein metabolic process;protein targeting;protein transport;proteolysis;transport	+	Known mitochondrial			6	13.7	58.252	1.29499	-0.472875	-2.76288	Q10713	Q10713	Mitochondrial-processing peptidase subunit alpha	PMPCA
20.0465	20.7869	20.4533	20.4476	21.0353	21.2612	amine metabolic process;biological regulation;biosynthetic process;catabolic process;cellular amino acid metabolic process;cellular ketone metabolic process;cellular metabolic process;cellular nitrogen compound metabolic process;cellular process;metabolic process;nitrogen compound metabolic process;organic acid metabolic process;primary metabolic process;regulation of transport;small molecule met…	+	Known mitochondrial			9	18.5	61.397	0.68296	-0.485813	-1.50199	P00367;P49448	P00367;P49448	Glutamate dehydrogenase 1, mitochondrial;Glutamate dehydrogenase 2, mitochondrial	GLUD1;GLUD2
20.8623	20.2581	20.1492	21.2814	20.1846	21.3732		+	Known mitochondrial			4	8.3	60.718	0.520545	-0.52324	-1.18498	Q9H857	Q9H857	5-nucleotidase domain-containing protein 2	NT5DC2
19.9834	20.7383	20.0781	20.9135	20.7868	20.7663	anatomical structure morphogenesis;cellular metabolic process;cellular nitrogen compound metabolic process;cellular process;developmental process;macromolecule metabolic process;metabolic process;mRNA metabolic process;mRNA processing;nitrogen compound metabolic process;nucleobase-containing compound metabolic process;primary metabolic process;RNA metabolic process;RNA processing	+	Known mitochondrial			3	7.3	53.126	1.08002	-0.555631	-2.29744	Q12849	Q12849	G-rich sequence factor 1	GRSF1
19.655	21.1527	21.5631	20.7867	21.6022	21.6832	cellular metabolic process;cellular process;establishment of localization;macromolecule metabolic process;metabolic process;primary metabolic process;protein folding;protein maturation;protein metabolic process;protein targeting;protein transport;transmembrane transport;transport	+	Known mitochondrial			4	41.5	15.996	0.366512	-0.567104	-0.876963	Q8N4Q1	Q8N4Q1	Mitochondrial intermembrane space import and assembly protein 40	CHCHD4
20.4131	20.3715	20.6871	20.3511	21.1772	21.7132	cellular metabolic process;cellular process;establishment of localization;macromolecule metabolic process;metabolic process;primary metabolic process;protein metabolic process;protein targeting;protein transport;transport	+	Known mitochondrial			3	8.7	29.763	0.653513	-0.589916	-1.44463	O75431	O75431	Metaxin-2	MTX2
20.7433	19.9178	19.9503	19.9238	20.847	21.6404	cellular metabolic process;cellular process;generation of precursor metabolites and energy;metabolic process;response to chemical stimulus;response to oxidative stress;response to stimulus;response to stress;small molecule metabolic process	+	Known mitochondrial			2	6	52.545	0.458497	-0.599925	-1.0624	O75306	O75306	NADH dehydrogenase [ubiquinone] iron-sulfur protein 2, mitochondrial	NDUFS2
25.449	24.5649	24.8085	25.6449	25.6289	25.3677	biological regulation;cell division;cell killing;cellular component assembly;cellular component movement;cellular component organization;cellular macromolecular complex assembly;cellular process;cytoskeleton organization;cytoskeleton-dependent intracellular transport;establishment of localization;immune system process;macromolecular complex assembly;organelle assembly;organelle organization;prote…		Predicted mitochondrial			3	47.7	49.67	1.02197	-0.606401	-2.17696	P07437;A6NNZ2;CON__ENSEMBL:ENSBTAP00000025008;Q9H4B7	P07437	Tubulin beta chain	TUBB
20.3658	22.9851	20.3383	20.9888	22.1097	22.5458	amine metabolic process;anatomical structure development;biological regulation;biosynthetic process;catabolic process;cellular amide metabolic process;cellular amino acid metabolic process;cellular component assembly;cellular component organization;cellular ketone metabolic process;cellular metabolic process;cellular nitrogen compound metabolic process;cellular process;developmental process;macro…		Predicted mitochondrial			9	31.7	34.735	0.261739	-0.651712	-0.656511	P05089	P05089	Arginase-1	ARG1
20.0225	20.6889	20.4152	19.9391	21.5181	21.7716		+	Known mitochondrial			8	7.6	133.94	0.506918	-0.700728	-1.15818	Q7L2E3	Q7L2E3	Putative ATP-dependent RNA helicase DHX30	DHX30
20.0298	21.4511	21.5955	21.0624	22.2827	21.9203	multicellular organismal process;neurological system process	+	Known mitochondrial			5	21.8	33.31	0.519481	-0.729645	-1.18289	Q9BPW8	Q9BPW8	Protein NipSnap homolog 1	NIPSNAP1
21.9607	22.3815	22.2251	22.2786	23.2486	23.2866	alcohol metabolic process;biosynthetic process;carbohydrate metabolic process;catabolic process;cellular aldehyde metabolic process;cellular metabolic process;cellular nitrogen compound metabolic process;cellular process;cofactor metabolic process;developmental process;embryo development;generation of precursor metabolites and energy;heterocycle metabolic process;metabolic process;nitrogen compou…	+	Predicted mitochondrial			10	45.1	30.791	0.997934	-0.748874	-2.12762	P60174	P60174	Triosephosphate isomerase	TPI1
23.083	21.9421	22.2944	23.3001	22.944	23.5601	anatomical structure development;biological regulation;catabolic process;cell activation;cell communication;cellular metabolic process;cellular process;developmental process;establishment of localization;exocytosis;macromolecule metabolic process;metabolic process;primary metabolic process;protein metabolic process;proteolysis;proteolysis involved in cellular protein catabolic process;regulation …		Predicted mitochondrial			12	22.9	72.332	1.01862	-0.828225	-2.17007	P11021	P11021	78 kDa glucose-regulated protein	HSPA5
21.3458	20.2426	20.1807	20.8909	21.6206	21.8293	cellular component organization;cellular membrane organization;cellular metabolic process;cellular process;establishment of localization;macromolecule metabolic process;membrane organization;metabolic process;mitochondrion organization;organelle organization;primary metabolic process;protein metabolic process;protein targeting;protein transport;transport	+	Known mitochondrial			2	16.2	15.521	0.840207	-0.85718	-1.81043	Q9NS69	Q9NS69	Mitochondrial import receptor subunit TOM22 homolog	TOMM22
19.803	20.7726	20.7749	20.1334	22.9212	20.9033	cell cycle;cellular process;interspecies interaction between organisms;multi-organism process	+	Known mitochondrial			4	23	25.384	0.414491	-0.869127	-0.974377	Q8TAE8	Q8TAE8	Growth arrest and DNA damage-inducible proteins-interacting protein 1	GADD45GIP1
22.5666	22.1662	21.5327	24.1889	24.2154	20.4772	biosynthetic process;cell cycle;cell death;cellular metabolic process;cellular process;death;macromolecule metabolic process;metabolic process;primary metabolic process;protein metabolic process;translation	+	Known mitochondrial			5	38.7	15.383	0.273771	-0.872	-0.682517	Q8IXM3	Q8IXM3	39S ribosomal protein L41, mitochondrial	MRPL41
22.7059	23.2251	23.3665	23.2366	24.3463	24.3831	biological regulation;catabolic process;cellular metabolic process;cellular process;metabolic process;response to chemical stimulus;response to oxidative stress;response to stimulus;response to stress	+	Predicted mitochondrial			7	32.3	21.892	0.977582	-0.889538	-2.08607	P32119	P32119	Peroxiredoxin-2	PRDX2
20.062	20.2716	19.3592	20.5471	20.1851	21.6894	biosynthetic process;cellular metabolic process;cellular process;macromolecule metabolic process;metabolic process;primary metabolic process;protein metabolic process;translation	+	Known mitochondrial			2	21.9	15.139	0.791376	-0.909621	-1.71407	O60783	O60783	28S ribosomal protein S14, mitochondrial	MRPS14
19.8073	21.0906	20.9539	21.3697	21.1385	22.0901	cellular component assembly;cellular component organization;cellular macromolecular complex assembly;cellular metabolic process;cellular process;locomotion;macromolecular complex assembly;macromolecule metabolic process;metabolic process;mitosis;nuclear division;organelle fission;organelle organization;primary metabolic process;protein complex assembly;protein folding;protein metabolic process;pr…	+	Known mitochondrial			3	34	50.432	0.854894	-0.915496	-1.83955	Q13509	Q13509	Tubulin beta-3 chain	TUBB3
20.7859	19.5016	19.2976	21.9123	20.4112	20.0219	biological regulation;biosynthetic process;cellular metabolic process;cellular nitrogen compound metabolic process;cellular process;macromolecule metabolic process;metabolic process;nitrogen compound metabolic process;nucleobase-containing compound metabolic process;primary metabolic process;RNA metabolic process;transcription initiation, DNA-dependent	+	Known mitochondrial			2	4.5	45.348	0.549446	-0.920116	-1.24165	Q9H5Q4	Q9H5Q4	Dimethyladenosine transferase 2, mitochondrial	TFB2M
20.3273	21.2755	21.1395	21.8965	21.5292	22.2545	amine metabolic process;biosynthetic process;cellular amino acid metabolic process;cellular component assembly;cellular component organization;cellular ketone metabolic process;cellular metabolic process;cellular nitrogen compound metabolic process;cellular process;heterocycle metabolic process;macromolecular complex assembly;metabolic process;multicellular organismal process;neurological system …	+	Known mitochondrial			6	18.7	48.534	1.26734	-0.9793	-2.7011	P04181	P04181	Ornithine aminotransferase, mitochondrial;Ornithine aminotransferase, hepatic form;Ornithine aminotransferase, renal form	OAT
28.379	27.4369	27.8664	28.7534	29.0019	28.8962	biological regulation;cell junction organization;cellular component assembly;cellular component movement;cellular component organization;cellular membrane organization;cellular metabolic process;cellular process;coagulation;cytoskeleton organization;immune system process;locomotion;macromolecule metabolic process;membrane organization;metabolic process;multicellular organismal process;organelle o…		Known mitochondrial	+	DSP crosslinked_Control	8	64.3	41.792	1.60918	-0.989721	-3.51352	P63261;P60709;Q6S8J3;A5A3E0;P0CG38;Q562R1;Q9BYX7;P0CG39	P63261;P60709	Actin, cytoplasmic 2;Actin, cytoplasmic 2, N-terminally processed;Actin, cytoplasmic 1;Actin, cytoplasmic 1, N-terminally processed	ACTG1;ACTB
20.8282	19.4191	19.4899	20.5841	21.2314	20.9531		+	Known mitochondrial			2	22	13.291	0.955108	-1.01047	-2.04043	Q5RI15	Q5RI15	Cytochrome c oxidase protein 20 homolog	COX20
20.422	20.3407	20.371	21.952	21.1843	21.0642	cellular metabolic process;cellular process;generation of precursor metabolites and energy;metabolic process;response to chemical stimulus;response to drug;response to endogenous stimulus;response to stimulus;small molecule metabolic process	+	Known mitochondrial	+	DSP crosslinked_Control	3	6.2	29.668	1.66698	-1.02228	-3.66272	P47985;P0C7P4	P47985;P0C7P4	Cytochrome b-c1 complex subunit Rieske, mitochondrial;Cytochrome b-c1 complex subunit 11;Putative cytochrome b-c1 complex subunit Rieske-like protein 1	UQCRFS1;UQCRFS1P1
20.187	19.8254	19.7982	20.4422	21.5667	20.9003	amine metabolic process;biosynthetic process;cellular amino acid metabolic process;cellular ketone metabolic process;cellular metabolic process;cellular nitrogen compound metabolic process;cellular process;heterocycle metabolic process;metabolic process;nitrogen compound metabolic process;organic acid metabolic process;primary metabolic process;response to chemical stimulus;response to oxidative …	+	Known mitochondrial	+	DSP crosslinked_Control	3	16.3	33.36	1.37863	-1.03283	-2.95362	P32322	P32322	Pyrroline-5-carboxylate reductase 1, mitochondrial	PYCR1
20.0941	20.5075	19.9849	20.7095	21.5178	21.5198	catabolic process;cellular ketone metabolic process;cellular metabolic process;cellular nitrogen compound metabolic process;cellular process;cofactor metabolic process;heterocycle metabolic process;metabolic process;nitrogen compound metabolic process;nucleobase-containing compound metabolic process;nucleobase-containing small molecule metabolic process;nucleotide metabolic process;organic acid m…	+	Known mitochondrial	+	DSP crosslinked_Control	3	9.1	42.183	1.54957	-1.05352	-3.36355	O43837	O43837	Isocitrate dehydrogenase [NAD] subunit beta, mitochondrial	IDH3B
23.97	22.5797	22.9122	24.0301	24.4256	24.1852	anatomical structure development;biological regulation;cellular component organization;cellular metabolic process;cellular process;developmental process;immune system process;locomotion;macromolecule metabolic process;metabolic process;primary metabolic process;protein folding;protein metabolic process;regulation of protein modification process;regulation of transport;response to abiotic stimulus…		Predicted mitochondrial			8	26.7	83.263	1.14646	-1.05967	-2.43784	P08238;Q58FF7;Q58FF8	P08238	Heat shock protein HSP 90-beta	HSP90AB1
20.8346	19.0348	18.8877	20.2208	21.5215	20.2142		+	Known mitochondrial			2	6.7	41.28	0.630321	-1.0664	-1.39946	P82650	P82650	28S ribosomal protein S22, mitochondrial	MRPS22
20.1036	19.9726	20.0169	21.017	21.1324	21.185	biosynthetic process;catabolic process;cellular component disassembly;cellular component organization;cellular metabolic process;cellular nitrogen compound metabolic process;cellular process;establishment of localization;macromolecule metabolic process;metabolic process;mRNA metabolic process;multicellular organismal process;nitrogen compound metabolic process;nucleobase-containing compound metab…		Predicted mitochondrial	+	DSP crosslinked_Control	3	14.5	24.604	4.17439	-1.08046	-17.2071	P27635;Q96L21	P27635;Q96L21	60S ribosomal protein L10;60S ribosomal protein L10-like	RPL10;RPL10L
19.8383	19.0669	20.1519	19.5836	20.6808	22.155	cellular metabolic process;cellular nitrogen compound metabolic process;cellular process;macromolecule metabolic process;metabolic process;nitrogen compound metabolic process;nucleobase-containing compound metabolic process;primary metabolic process;RNA metabolic process;RNA processing;tRNA metabolic process;tRNA processing	+	Known mitochondrial			4	11.7	47.346	0.620688	-1.12075	-1.3807	Q7L0Y3	Q7L0Y3	Mitochondrial ribonuclease P protein 1	TRMT10C
20.0139	19.5895	19.7049	20.9176	21.076	20.8482	biosynthetic process;cellular metabolic process;cellular process;macromolecule metabolic process;metabolic process;primary metabolic process;protein metabolic process;translation	+	Known mitochondrial	+	DSP crosslinked_Control	3	23.5	19.198	2.9204	-1.17785	-8.20701	Q13405	Q13405	39S ribosomal protein L49, mitochondrial	MRPL49
24.4028	24.4648	24.3459	25.5208	25.3223	26.0444	alcohol metabolic process;biological regulation;biosynthetic process;carbohydrate metabolic process;catabolic process;cell death;cellular component organization;cellular metabolic process;cellular process;cytoskeleton organization;death;generation of precursor metabolites and energy;macromolecule metabolic process;macromolecule modification;metabolic process;organelle organization;peptidyl-amino …	+	Predicted mitochondrial	+	DSP crosslinked_Control	12	55.8	36.053	2.30617	-1.22468	-5.61589	P04406;O14556	P04406	Glyceraldehyde-3-phosphate dehydrogenase	GAPDH
19.2394	19.4961	20.0148	21.3481	20.3035	20.7733	biological regulation;cellular component organization;cellular membrane organization;cellular process;establishment of localization;membrane organization;protein targeting;protein transport;response to stimulus;signal transduction;transport		Predicted mitochondrial	+	DSP crosslinked_Control	3	26.1	27.764	1.49778	-1.22485	-3.2363	P27348	P27348	14-3-3 protein theta	YWHAQ
19.4569	20.9006	21.1974	22.1007	21.5419	21.5903	anatomical structure development;catabolic process;cellular ketone metabolic process;cellular metabolic process;cellular process;cofactor metabolic process;developmental process;generation of precursor metabolites and energy;metabolic process;organic acid metabolic process;small molecule metabolic process	+	Known mitochondrial			7	16.1	72.691	1.01572	-1.22603	-2.1641	P31040	P31040	Succinate dehydrogenase [ubiquinone] flavoprotein subunit, mitochondrial	SDHA
20.3053	19.5367	19.5684	20.3402	21.6344	21.1775	cellular metabolic process;cellular process;generation of precursor metabolites and energy;metabolic process;multicellular organismal process;small molecule metabolic process	+	Known mitochondrial			2	15.5	13.696	1.28648	-1.24723	-2.74378	P10606	P10606	Cytochrome c oxidase subunit 5B, mitochondrial	COX5B
20.383	19.9435	19.6924	20.0367	20.969	22.7738	alcohol metabolic process;biosynthetic process;carbohydrate metabolic process;cellular ketone metabolic process;cellular metabolic process;cellular process;lipid metabolic process;metabolic process;organic acid metabolic process;primary metabolic process;small molecule metabolic process		Known mitochondrial			4	4.3	129.63	0.688713	-1.25351	-1.51321	P11498	P11498	Pyruvate carboxylase, mitochondrial	PC
24.9973	23.5753	23.7728	25.1181	25.5931	25.5428	biological regulation;biosynthetic process;cellular component organization;cellular membrane organization;cellular metabolic process;cellular nitrogen compound metabolic process;cellular process;establishment of localization;Golgi vesicle transport;interspecies interaction between organisms;macromolecule metabolic process;membrane organization;metabolic process;mRNA metabolic process;mRNA process…		Predicted mitochondrial			12	30.3	70.897	1.30016	-1.30285	-2.77448	P11142;P54652	P11142	Heat shock cognate 71 kDa protein	HSPA8
19.2904	20.0417	20.1135	21.0744	21.1902	21.0917	cellular metabolic process;cellular process;establishment of localization;generation of precursor metabolites and energy;ion transport;metabolic process;small molecule metabolic process;transport	+	Known mitochondrial	+	DSP crosslinked_Control	3	9.3	42.509	2.09669	-1.30359	-4.90694	Q16795	Q16795	NADH dehydrogenase [ubiquinone] 1 alpha subcomplex subunit 9, mitochondrial	NDUFA9
20.5314	19.7858	20.0068	21.5131	21.1148	21.6239	biological regulation;cellular component organization;cellular homeostasis;cellular ion homeostasis;cellular metabolic process;cellular nitrogen compound metabolic process;cellular process;generation of precursor metabolites and energy;heterocycle metabolic process;homeostatic process;metabolic process;mitochondrion organization;nitrogen compound metabolic process;nucleobase-containing compound m…	+	Known mitochondrial	+	DSP crosslinked_Control	3	4.8	79.467	2.07988	-1.30927	-4.85322	P28331	P28331	NADH-ubiquinone oxidoreductase 75 kDa subunit, mitochondrial	NDUFS1
19.885	19.8156	19.267	20.9831	21.5679	20.4192	biosynthetic process;cellular metabolic process;cellular nitrogen compound metabolic process;cellular process;heterocycle metabolic process;metabolic process;nitrogen compound metabolic process;nucleobase-containing compound metabolic process;nucleobase-containing small molecule interconversion;nucleobase-containing small molecule metabolic process;nucleoside metabolic process;nucleotide metaboli…	+	Known mitochondrial	+	DSP crosslinked_Control	3	18.7	20.658	1.59041	-1.33416	-3.46588	O00746	O00746	Nucleoside diphosphate kinase, mitochondrial	NME4
18.8831	19.4793	20.0099	21.0411	20.0977	21.266	cellular metabolic process;cellular process;generation of precursor metabolites and energy;metabolic process;small molecule metabolic process	+	Known mitochondrial	+	DSP crosslinked_Control	3	44	13.459	1.30199	-1.34417	-2.7786	Q16718	Q16718	NADH dehydrogenase [ubiquinone] 1 alpha subcomplex subunit 5	NDUFA5
20.0338	19.0387	19.59	20.8837	20.8875	21.0452	anatomical structure morphogenesis;developmental process;metabolic process	+	Known mitochondrial	+	DSP crosslinked_Control	3	14.2	30.601	2.04104	-1.38466	-4.73086	P53701	P53701	Cytochrome c-type heme lyase	HCCS
24.2556	23.1123	23.4628	24.9668	25.2498	24.8041	alcohol metabolic process;biological regulation;biosynthetic process;carbohydrate metabolic process;catabolic process;cellular metabolic process;cellular nitrogen compound metabolic process;cellular process;generation of precursor metabolites and energy;macromolecule metabolic process;metabolic process;multi-organism process;nitrogen compound metabolic process;nucleobase-containing compound metab…		Predicted mitochondrial	+	DSP crosslinked_Control	13	38.2	47.168	1.73896	-1.39664	-3.85397	P06733;P13929;P09104	P06733	Alpha-enolase	ENO1
23.0663	21.6446	21.7307	22.8749	23.8725	23.8976	amine transport;biological regulation;cell activation;cellular component organization;cellular membrane organization;cellular metabolic process;cellular nitrogen compound metabolic process;cellular process;establishment of localization;hormone transport;macromolecule metabolic process;membrane organization;metabolic process;mRNA metabolic process;nitrogen compound metabolic process;nucleobase-con…		Predicted mitochondrial			5	33.9	27.745	1.15538	-1.40112	-2.45693	P63104	P63104	14-3-3 protein zeta/delta	YWHAZ
20.3672	19.7158	19.8265	21.9912	20.0755	22.0796	biosynthetic process;catabolic process;cellular metabolic process;cellular nitrogen compound metabolic process;cellular process;establishment of localization;generation of precursor metabolites and energy;heterocycle metabolic process;hydrogen transport;ion transport;metabolic process;nitrogen compound metabolic process;nucleobase-containing compound catabolic process;nucleobase-containing compou…	+	Known mitochondrial			2	13.7	17.49	0.967026	-1.4123	-2.0646	P30049	P30049	ATP synthase subunit delta, mitochondrial	ATP5D
19.3268	20.1449	19.846	21.6009	20.4775	21.5967	cellular metabolic process;cellular process;macromolecule metabolic process;metabolic process;primary metabolic process;protein folding;protein metabolic process;proteolysis;proteolysis involved in cellular protein catabolic process	+	Known mitochondrial	+	DSP crosslinked_Control	4	7.4	69.223	1.51317	-1.45246	-3.27384	O76031	O76031	ATP-dependent Clp protease ATP-binding subunit clpX-like, mitochondrial	CLPX
19.4946	19.5073	19.4795	21.1003	21.0435	20.7457	cellular metabolic process;cellular process;generation of precursor metabolites and energy;metabolic process;small molecule metabolic process	+	Known mitochondrial	+	DSP crosslinked_Control	3	14.5	27.843	3.73675	-1.46932	-13.3258	P38117	P38117	Electron transfer flavoprotein subunit beta	ETFB
20.6316	21.392	21.3626	23.2852	23.4048	21.1405	biosynthetic process;catabolic process;cellular metabolic process;cellular nitrogen compound metabolic process;cellular process;establishment of localization;generation of precursor metabolites and energy;heterocycle metabolic process;hydrogen transport;ion transport;metabolic process;nitrogen compound metabolic process;nucleobase-containing compound catabolic process;nucleobase-containing compou…	+	Known mitochondrial			5	30	23.277	0.889115	-1.48145	-1.9077	P48047	P48047	ATP synthase subunit O, mitochondrial	ATP5O
19.7379	20.9934	21.3676	23.4539	21.5363	21.5548	biosynthetic process;catabolic process;cellular component disassembly;cellular component organization;cellular metabolic process;cellular nitrogen compound metabolic process;cellular process;establishment of localization;macromolecule metabolic process;metabolic process;mRNA metabolic process;nitrogen compound metabolic process;nucleobase-containing compound metabolic process;primary metabolic pr…		Predicted mitochondrial			5	26	24.146	0.855971	-1.48203	-1.84169	P61313	P61313	60S ribosomal protein L15	RPL15
19.5537	19.1713	18.8623	21.4098	21.0416	19.7213	biosynthetic process;cellular metabolic process;cellular process;macromolecule metabolic process;metabolic process;primary metabolic process;protein metabolic process;translation	+	Known mitochondrial	+	DSP crosslinked_Control	2	6.2	33.535	1.30165	-1.52847	-2.77784	P49406	P49406	39S ribosomal protein L19, mitochondrial	MRPL19
19.5423	19.8068	19.9854	21.3034	21.4901	21.2231	behavior;biological regulation;multicellular organismal process;neurological system process;regulation of transport;response to stimulus	+	Predicted mitochondrial	+	DSP crosslinked_Control	3	13	40.744	3.3051	-1.56069	-10.3312	Q8NBU5	Q8NBU5	ATPase family AAA domain-containing protein 1	ATAD1
19.4831	19.5003	19.6069	21.4156	21.0694	20.8025	cellular component organization;cellular metabolic process;cellular process;extracellular matrix organization;extracellular structure organization;macromolecule metabolic process;metabolic process;primary metabolic process;protein folding;protein metabolic process		Predicted mitochondrial	+	DSP crosslinked_Control	2	9.3	23.742	3.00164	-1.56572	-8.61879	P23284	P23284	Peptidyl-prolyl cis-trans isomerase B	PPIB
20.3496	22.0773	21.8722	23.71	23.9291	21.432	carbohydrate metabolic process;catabolic process;cellular aldehyde metabolic process;cellular ketone metabolic process;cellular metabolic process;cellular process;cofactor metabolic process;metabolic process;organic acid metabolic process;primary metabolic process;small molecule metabolic process	+	Known mitochondrial			8	22.8	50.909	0.756472	-1.59066	-1.64557	P48735	P48735	Isocitrate dehydrogenase [NADP], mitochondrial	IDH2
20.6145	18.7187	19.0904	21.3597	19.9629	21.8796	biological regulation;cellular component assembly;cellular component organization;cellular homeostasis;cellular ion homeostasis;cellular macromolecular complex assembly;cellular metabolic process;cellular process;developmental process;embryo development;establishment of localization;generation of precursor metabolites and energy;homeostatic process;ion transport;macromolecular complex assembly;me…	+	Known mitochondrial			3	16.2	29.81	0.912709	-1.59285	-1.95494	O43819	O43819	Protein SCO2 homolog, mitochondrial	SCO2
24.9589	23.2702	23.5825	25.3475	25.7321	25.6043	alcohol metabolic process;carbohydrate metabolic process;catabolic process;cell death;cellular metabolic process;cellular process;death;generation of precursor metabolites and energy;metabolic process;primary metabolic process;small molecule metabolic process		Predicted mitochondrial	+	DSP crosslinked_Control	20	40.7	57.936	1.42374	-1.62414	-3.05906	P14618;P30613	P14618	Pyruvate kinase PKM	PKM
20.4602	19.1439	19.2184	20.5891	21.3269	21.8072	biosynthetic process;cellular metabolic process;cellular process;macromolecule metabolic process;metabolic process;primary metabolic process;protein metabolic process;translation	+	Known mitochondrial	+	DSP crosslinked_Control	2	20.8	17.442	1.37479	-1.63354	-2.94474	Q9BYC9	Q9BYC9	39S ribosomal protein L20, mitochondrial	MRPL20
22.9294	21.9006	22.5532	23.9155	24.087	24.3373	biological adhesion;biological regulation;biosynthetic process;cell adhesion;cellular metabolic process;cellular nitrogen compound metabolic process;cellular process;heterocycle metabolic process;macromolecule metabolic process;metabolic process;nitrogen compound metabolic process;nucleobase-containing compound metabolic process;nucleobase-containing small molecule interconversion;nucleobase-cont…		Predicted mitochondrial	+	DSP crosslinked_Control	2	44.1	17.298	2.15319	-1.65219	-5.09077	P22392;O60361	P22392;O60361	Nucleoside diphosphate kinase B;Putative nucleoside diphosphate kinase	NME2;NME2P1
19.4075	19.8331	19.7301	21.2129	21.2717	21.5603	biosynthetic process;cellular metabolic process;cellular process;macromolecule metabolic process;metabolic process;primary metabolic process;protein metabolic process;translation	+	Known mitochondrial	+	DSP crosslinked_Control	3	12.4	29.45	3.2697	-1.6914	-10.1162	Q9HD33	Q9HD33	39S ribosomal protein L47, mitochondrial	MRPL47
22.7147	21.4592	21.4289	23.3229	23.68	23.6896	anatomical structure development;biological regulation;catabolic process;cell killing;cell proliferation;cellular metabolic process;cellular process;developmental process;homeostatic process;immune system process;metabolic process;regulation of transport;response to chemical stimulus;response to oxidative stress;response to stimulus;response to stress		Predicted mitochondrial	+	DSP crosslinked_Control	6	44.7	22.11	1.738	-1.69658	-3.85138	Q06830	Q06830	Peroxiredoxin-1	PRDX1
24.5984	22.9263	22.9823	25.5387	25.5503	24.8282	biological regulation;biosynthetic process;catabolic process;cell differentiation;cellular component assembly;cellular component disassembly;cellular component organization;cellular macromolecular complex assembly;cellular metabolic process;cellular nitrogen compound metabolic process;cellular process;developmental process;establishment of localization;macromolecular complex assembly;macromolecul…	+	Predicted mitochondrial	+	DSP crosslinked_Control	5	37.1	16.273	1.40528	-1.8034	-3.0157	P62263	P62263	40S ribosomal protein S14	RPS14
21.8279	20.2136	20.5498	22.1859	22.7198	23.1757	alcohol metabolic process;biosynthetic process;carbohydrate metabolic process;catabolic process;cellular metabolic process;cellular process;generation of precursor metabolites and energy;metabolic process;primary metabolic process;small molecule metabolic process		Predicted mitochondrial	+	DSP crosslinked_Control	6	21.3	44.614	1.48981	-1.83004	-3.21697	P00558;P07205	P00558	Phosphoglycerate kinase 1	PGK1
19.9801	19.1081	19.3746	21.2159	21.6988	21.1021	catabolic process;cellular ketone metabolic process;cellular lipid metabolic process;cellular metabolic process;cellular process;lipid metabolic process;metabolic process;organic acid metabolic process;primary metabolic process;small molecule metabolic process	+	Known mitochondrial	+	DSP crosslinked_Control	2	8.3	32.816	2.37179	-1.85136	-5.85412	P42126	P42126	Enoyl-CoA delta isomerase 1, mitochondrial	ECI1
20.5533	17.9412	19.1019	20.851	21.1795	21.1415	anatomical structure morphogenesis;biological regulation;cell cycle;cellular process;developmental process;interspecies interaction between organisms;multi-organism process;regulation of cell cycle;regulation of protein modification process;regulation of translation;regulation of transport;rhythmic process		Predicted mitochondrial			2	6.9	35.076	1.14599	-1.85857	-2.43685	P63244	P63244	Guanine nucleotide-binding protein subunit beta-2-like 1;Guanine nucleotide-binding protein subunit beta-2-like 1, N-terminally processed	GNB2L1
24.189	23.2947	22.5669	24.7093	25.3708	25.6382	anatomical structure development;anatomical structure formation involved in morphogenesis;biological regulation;cellular component organization;cellular process;developmental process;establishment of localization;extracellular matrix organization;extracellular structure organization;multicellular organismal process;regulation of body fluid levels;regulation of organelle organization;regulation of…		Predicted mitochondrial	+	DSP crosslinked_Control	16	49.6	38.604	1.59247	-1.88926	-3.47109	P07355;A6NMY6	P07355;A6NMY6	Annexin A2;Putative annexin A2-like protein	ANXA2;ANXA2P2
20.0853	18.7695	18.9735	21.5643	21.0444	20.9558	amine metabolic process;cellular amino acid metabolic process;cellular ketone metabolic process;cellular metabolic process;cellular nitrogen compound metabolic process;cellular process;macromolecule metabolic process;metabolic process;nitrogen compound metabolic process;nucleobase-containing compound metabolic process;organic acid metabolic process;primary metabolic process;RNA metabolic process;…	+	Known mitochondrial	+	DSP crosslinked_Control	4	7.2	81.035	1.87803	-1.91207	-4.24199	Q9BW92	Q9BW92	Threonine--tRNA ligase, mitochondrial	TARS2
20.6859	19.5355	19.4258	21.8366	22.3228	21.251	cellular metabolic process;cellular nitrogen compound metabolic process;cellular process;heterocycle metabolic process;macromolecule metabolic process;macromolecule modification;metabolic process;nitrogen compound metabolic process;nucleobase-containing compound metabolic process;nucleobase-containing small molecule metabolic process;nucleoside metabolic process;primary metabolic process;protein …	+	Known mitochondrial	+	DSP crosslinked_Control	2	7.7	35.505	1.71098	-1.92101	-3.77889	Q9BQ69	Q9BQ69	O-acetyl-ADP-ribose deacetylase MACROD1	MACROD1
19.9835	19.4664	19.6959	21.124	21.5815	22.3058	amine metabolic process;anatomical structure development;biological regulation;cell proliferation;cellular amino acid metabolic process;cellular ketone metabolic process;cellular metabolic process;cellular nitrogen compound metabolic process;cellular process;developmental process;localization;metabolic process;nitrogen compound metabolic process;organic acid metabolic process;peptide metabolic pr…		Predicted mitochondrial	+	DSP crosslinked_Control	2	12.9	23.356	2.18948	-1.95518	-5.21166	P09211	P09211	Glutathione S-transferase P	GSTP1
19.9344	20.6107	20.447	22.6791	22.8236	21.3902	catabolic process;cellular lipid metabolic process;cellular metabolic process;cellular process;lipid metabolic process;metabolic process;primary metabolic process;response to chemical stimulus;response to oxidative stress;response to stimulus;response to stress	+	Predicted mitochondrial	+	DSP crosslinked_Control	5	32.1	25.035	1.7709	-1.96694	-3.94089	P30041	P30041	Peroxiredoxin-6	PRDX6
20.0935	17.4137	19.1214	20.1656	21.5555	20.8323	amine metabolic process;anatomical structure development;carbohydrate metabolic process;catabolic process;cellular aldehyde metabolic process;cellular amino acid metabolic process;cellular ketone metabolic process;cellular lipid metabolic process;cellular metabolic process;cellular nitrogen compound metabolic process;cellular process;cofactor metabolic process;developmental process;heterocycle me…	+	Predicted mitochondrial			3	11.1	46.659	1.05442	-1.97498	-2.24407	O75874	O75874	Isocitrate dehydrogenase [NADP] cytoplasmic	IDH1
20.2484	19.5439	19.6724	21.7131	21.8214	21.9027	cellular metabolic process;cellular process;establishment of localization;macromolecule metabolic process;metabolic process;primary metabolic process;protein metabolic process;protein targeting;protein transport;transport	+	Known mitochondrial	+	DSP crosslinked_Control	4	8.6	51.355	3.05669	-1.99083	-8.90846	O43615	O43615	Mitochondrial import inner membrane translocase subunit TIM44	TIMM44
20.13	20.0899	20.0411	22.8979	22.6802	20.7688	biosynthetic process;catabolic process;cellular component disassembly;cellular component organization;cellular metabolic process;cellular nitrogen compound metabolic process;cellular process;establishment of localization;macromolecule metabolic process;metabolic process;mRNA metabolic process;nitrogen compound metabolic process;nucleobase-containing compound metabolic process;primary metabolic pr…		Predicted mitochondrial	+	DSP crosslinked_Control	3	9.2	46.108	1.39741	-2.02864	-2.99729	P39023	P39023	60S ribosomal protein L3	RPL3
20.415	19.0499	19.4542	21.0659	22.1651	21.8477	macromolecule metabolic process;metabolic process;primary metabolic process;protein metabolic process;proteolysis		Known mitochondrial	+	DSP crosslinked_Control	3	6	56.166	1.77324	-2.05324	-3.94729	P28838	P28838	Cytosol aminopeptidase	LAP3
21.4276	20.7172	21.1343	24.0296	23.8905	21.5308	biosynthetic process;catabolic process;cellular component disassembly;cellular component organization;cellular metabolic process;cellular nitrogen compound metabolic process;cellular process;establishment of localization;macromolecule metabolic process;metabolic process;mRNA metabolic process;nitrogen compound metabolic process;nucleobase-containing compound metabolic process;primary metabolic pr…		Predicted mitochondrial			7	27.9	34.362	1.15647	-2.05727	-2.45926	P46777	P46777	60S ribosomal protein L5	RPL5
20.9533	21.8457	21.3551	24.1999	23.6811	22.8611	anatomical structure formation involved in morphogenesis;biological adhesion;biological regulation;cell adhesion;cell differentiation;cell motility;cellular component movement;cellular component organization;cellular process;cytokinesis;cytoskeleton organization;developmental process;embryo development;establishment of localization;establishment or maintenance of cell polarity;immune system proce…		Known mitochondrial	+	DSP crosslinked_Control	15	13.6	226.53	2.03053	-2.19605	-4.69816	P35579	P35579	Myosin-9	MYH9
20.6601	19.1979	17.5042	20.6708	21.191	22.3044	biosynthetic process;catabolic process;cellular component disassembly;cellular component organization;cellular metabolic process;cellular nitrogen compound metabolic process;cellular process;establishment of localization;interspecies interaction between organisms;macromolecule metabolic process;metabolic process;mRNA metabolic process;multi-organism process;nitrogen compound metabolic process;nuc…		Predicted mitochondrial			2	6	34.273	1.03271	-2.26799	-2.19911	P05388;Q8NHW5	P05388;Q8NHW5	60S acidic ribosomal protein P0;60S acidic ribosomal protein P0-like	RPLP0;RPLP0P6
20.2709	20.2607	17.8031	21.6901	22.5254	20.9704	anatomical structure development;biological regulation;cell motility;cellular component movement;cellular component organization;cellular membrane organization;cellular process;developmental process;establishment of localization;interspecies interaction between organisms;locomotion;membrane organization;multi-organism process;protein targeting;protein transport;regulation of protein modification …		Predicted mitochondrial			4	23.5	29.174	1.14765	-2.28373	-2.44038	P62258	P62258	14-3-3 protein epsilon	YWHAE
19.3373	18.7455	19.0082	20.5841	21.9216	21.5164	multi-organism process;response to biotic stimulus;response to stimulus		Predicted mitochondrial	+	DSP crosslinked_Control	2	6.2	50.118	2.23174	-2.31036	-5.35526	P26641	P26641	Elongation factor 1-gamma	EEF1G
20.766	22.3591	21.907	24.1955	24.2008	23.7039	biological regulation;biosynthetic process;catabolic process;cellular component disassembly;cellular component organization;cellular metabolic process;cellular nitrogen compound metabolic process;cellular process;establishment of localization;macromolecule metabolic process;metabolic process;mRNA metabolic process;nitrogen compound metabolic process;nucleobase-containing compound metabolic proces…		Predicted mitochondrial	+	DSP crosslinked_Control	10	40.2	22.591	2.02953	-2.35608	-4.69506	P46781	P46781	40S ribosomal protein S9	RPS9
24.3582	22.9243	23.2967	26.1547	26.2271	25.6326	biological regulation;biosynthetic process;catabolic process;cellular component disassembly;cellular component organization;cellular metabolic process;cellular nitrogen compound metabolic process;cellular process;establishment of localization;macromolecule metabolic process;metabolic process;mRNA metabolic process;nitrogen compound metabolic process;nucleobase-containing compound metabolic proces…		Predicted mitochondrial	+	DSP crosslinked_Control	11	39.2	32.728	2.21233	-2.47837	-5.28892	Q02878	Q02878	60S ribosomal protein L6	RPL6
19.0757	18.9838	18.2323	21.6451	21.4793	21.0981	amine metabolic process;cellular amino acid metabolic process;cellular ketone metabolic process;cellular metabolic process;cellular nitrogen compound metabolic process;cellular process;macromolecule metabolic process;metabolic process;nitrogen compound metabolic process;nucleobase-containing compound metabolic process;organic acid metabolic process;primary metabolic process;RNA metabolic process;…	+	Known mitochondrial	+	DSP crosslinked_Control	2	6.4	58.282	2.97122	-2.6436	-8.46246	Q9NP81	Q9NP81	Serine--tRNA ligase, mitochondrial	SARS2
21.6168	21.1516	21.3709	24.2485	24.4035	23.4638	biosynthetic process;catabolic process;cellular metabolic process;cellular nitrogen compound metabolic process;cellular process;establishment of localization;generation of precursor metabolites and energy;heterocycle metabolic process;hydrogen transport;ion transport;metabolic process;nitrogen compound metabolic process;nucleobase-containing compound catabolic process;nucleobase-containing compou…	+	Known mitochondrial	+	DSP crosslinked_Control	7	24.5	32.996	2.9389	-2.65883	-8.2992	P36542	P36542	ATP synthase subunit gamma, mitochondrial	ATP5C1
22.9109	22.1691	22.0546	25.3741	25.5369	24.2627	biosynthetic process;cellular metabolic process;cellular process;macromolecule metabolic process;metabolic process;primary metabolic process;protein metabolic process;translation	+	Known mitochondrial	+	DSP crosslinked_Control	3	25	10.165	2.29035	-2.6797	-5.55966	Q9BQ48	Q9BQ48	39S ribosomal protein L34, mitochondrial	MRPL34
33.9872	32.1599	32.5115	35.2625	36.1032	35.4496	anatomical structure development;cellular metabolic process;cellular process;developmental process;establishment of localization;macromolecule metabolic process;metabolic process;primary metabolic process;protein metabolic process;protein targeting;protein transport;transport	+	Known mitochondrial	+	DSP crosslinked_Control	8	80.4	10.998	1.9391	-2.71889	-4.42062	O60220	O60220	Mitochondrial import inner membrane translocase subunit Tim8 A	TIMM8A
22.9819	21.7162	22.038	25.3544	25.4225	24.7781	biosynthetic process;catabolic process;cellular component disassembly;cellular component organization;cellular metabolic process;cellular nitrogen compound metabolic process;cellular process;establishment of localization;macromolecule metabolic process;metabolic process;mRNA metabolic process;nitrogen compound metabolic process;nucleobase-containing compound metabolic process;primary metabolic pr…		Predicted mitochondrial	+	DSP crosslinked_Control	5	33.1	28.024	2.61584	-2.93965	-6.81594	P62917	P62917	60S ribosomal protein L8	RPL8
19.5445	20.2872	17.9575	23.1118	22.3636	21.554	biosynthetic process;catabolic process;cellular component disassembly;cellular component organization;cellular metabolic process;cellular nitrogen compound metabolic process;cellular process;establishment of localization;macromolecule metabolic process;metabolic process;mRNA metabolic process;nitrogen compound metabolic process;nucleobase-containing compound metabolic process;primary metabolic pr…	+	Predicted mitochondrial	+	DSP crosslinked_Control	2	14.5	12.538	1.70031	-3.08004	-3.7505	P18077	P18077	60S ribosomal protein L35a	RPL35A
19.6227	20.1162	20.0552	23.9076	24.0181	21.477	biosynthetic process;cellular metabolic process;cellular process;macromolecule metabolic process;metabolic process;primary metabolic process;protein metabolic process;translation	+	Known mitochondrial	+	DSP crosslinked_Control	3	31.1	12.629	1.71755	-3.20282	-3.79644	Q9Y291	Q9Y291	28S ribosomal protein S33, mitochondrial	MRPS33
19.7585	17.3494	19.8571	23.275	21.6252	22.2455	anatomical structure morphogenesis;biosynthetic process;catabolic process;cellular component disassembly;cellular component organization;cellular metabolic process;cellular nitrogen compound metabolic process;cellular process;developmental process;establishment of localization;macromolecule metabolic process;metabolic process;mRNA metabolic process;nitrogen compound metabolic process;nucleobase-c…	+	Predicted mitochondrial	+	DSP crosslinked_Control	5	24	24.831	1.63109	-3.39356	-3.56964	P62906	P62906	60S ribosomal protein L10a	RPL10A
19.9599	18.0802	17.6538	22.2229	21.7784	21.9297	biological regulation;cellular homeostasis;cellular ion homeostasis;cellular process;homeostatic process;response to stimulus;signal transduction		Predicted mitochondrial	+	DSP crosslinked_Control	3	12.4	26.922	2.04311	-3.41238	-4.73731	O00299	O00299	Chloride intracellular channel protein 1	CLIC1
22.9479	21.7049	21.5173	25.5634	25.8937	24.9954	biosynthetic process;catabolic process;cellular component disassembly;cellular component organization;cellular metabolic process;cellular nitrogen compound metabolic process;cellular process;establishment of localization;macromolecule metabolic process;metabolic process;mRNA metabolic process;nitrogen compound metabolic process;nucleobase-containing compound metabolic process;primary metabolic pr…	+	Predicted mitochondrial	+	DSP crosslinked_Control	3	15.4	13.293	2.56191	-3.42753	-6.59257	P49207	P49207	60S ribosomal protein L34	RPL34
21.552	21.2271	21.0823	26.4649	24.7484	23.0523	biological regulation;biosynthetic process;cellular component assembly;cellular component organization;cellular macromolecular complex assembly;cellular metabolic process;cellular nitrogen compound metabolic process;cellular process;DNA metabolic process;DNA replication;macromolecular complex assembly;macromolecule metabolic process;metabolic process;nitrogen compound metabolic process;nucleobase…	+	Known mitochondrial	+	DSP crosslinked_Control	9	31.7	29.096	1.59831	-3.46808	-3.48589	Q00059	Q00059	Transcription factor A, mitochondrial	TFAM
19.692	21.6766	21.9557	24.9723	24.9589	23.8852	biosynthetic process;cellular metabolic process;cellular process;macromolecule metabolic process;metabolic process;primary metabolic process;protein metabolic process;translation	+	Known mitochondrial	+	DSP crosslinked_Control	3	24.5	21.405	1.9254	-3.49732	-4.38009	Q9BYC8	Q9BYC8	39S ribosomal protein L32, mitochondrial	MRPL32
20.928	20.6163	20.4208	24.1487	24.7125	23.7623	biosynthetic process;cellular metabolic process;cellular process;macromolecule metabolic process;metabolic process;primary metabolic process;protein metabolic process;translation	+	Known mitochondrial	+	DSP crosslinked_Control	4	35.2	15.947	3.46453	-3.5528	-11.3537	Q6P1L8	Q6P1L8	39S ribosomal protein L14, mitochondrial	MRPL14
20.1274	16.933	17.2847	22.4232	21.9248	20.7431	cellular component assembly;cellular component organization;cellular macromolecular complex assembly;cellular process;macromolecular complex assembly;protein complex assembly;protein complex biogenesis	+	Known mitochondrial	+	DSP crosslinked_Control	2	8.8	49.237	1.47343	-3.58199	-3.17742	Q7L592	Q7L592	NADH dehydrogenase [ubiquinone] complex I, assembly factor 7	NDUFAF7
20.0974	17.9044	17.3071	22.7212	23.2017	20.2339	biological regulation;cellular homeostasis;cellular process;homeostatic process	+	Known mitochondrial	+	DSP crosslinked_Control	4	30.8	19.206	1.35106	-3.61594	-2.89007	O95881	O95881	Thioredoxin domain-containing protein 12	TXNDC12
20.9994	17.6704	17.4584	23.1536	23.5487	21.0028	biosynthetic process;catabolic process;cellular component disassembly;cellular component organization;cellular metabolic process;cellular nitrogen compound metabolic process;cellular process;establishment of localization;macromolecule metabolic process;metabolic process;mRNA metabolic process;nitrogen compound metabolic process;nucleobase-containing compound metabolic process;primary metabolic pr…		Predicted mitochondrial			3	18.2	20.762	1.29824	-3.85894	-2.77016	Q02543	Q02543	60S ribosomal protein L18a	RPL18A
19.4648	17.7344	17.7056	22.8728	22.9896	21.1708	amine metabolic process;anatomical structure development;biological regulation;biosynthetic process;cellular amino acid metabolic process;cellular aromatic compound metabolic process;cellular ketone metabolic process;cellular metabolic process;cellular nitrogen compound metabolic process;cellular process;cofactor metabolic process;developmental process;heterocycle metabolic process;metabolic proc…	+	Predicted mitochondrial	+	DSP crosslinked_Control	2	12.4	16.386	2.09108	-4.0428	-4.88897	Q03393	Q03393	6-pyruvoyl tetrahydrobiopterin synthase	PTS
20.0739	19.8826	17.0348	23.7401	24.3014	21.5594	biosynthetic process;cellular metabolic process;cellular process;macromolecule metabolic process;metabolic process;primary metabolic process;protein metabolic process;translation	+	Known mitochondrial	+	DSP crosslinked_Control	6	14.9	48.006	1.50643	-4.20321	-3.25737	P82675	P82675	28S ribosomal protein S5, mitochondrial	MRPS5
20.379	18.1902	18.5698	23.4491	23.3286	23.0739	anatomical structure development;biological regulation;cell communication;cellular homeostasis;cellular ion homeostasis;cellular process;coagulation;developmental process;establishment of localization;homeostatic process;ion transport;multicellular organismal process;regulation of body fluid levels;response to chemical stimulus;response to stimulus;transmembrane transport;transport		Known mitochondrial	+	DSP crosslinked_Control	4	6.1	103.01	2.46132	-4.2375	-6.19267	P57103	P57103	Sodium/calcium exchanger 3	SLC8A3
20.1334	18.4883	17.8311	23.6401	23.7278	22.292		+	Known mitochondrial	+	DSP crosslinked_Control	2	17.4	18.546	2.22147	-4.40238	-5.3201	Q8TCC3	Q8TCC3	39S ribosomal protein L30, mitochondrial	MRPL30
20.022	17.9387	18.5675	25.5439	23.656	22.3465	anatomical structure morphogenesis;biological regulation;catabolic process;cellular component assembly;cellular component morphogenesis;cellular component organization;cellular metabolic process;cellular nitrogen compound metabolic process;cellular process;developmental process;establishment of localization;macromolecular complex assembly;macromolecule metabolic process;metabolic process;mitochon…	+	Known mitochondrial	+	DSP crosslinked_Control	16	25.2	85.95	1.96306	-5.0061	-4.49217	Q8TCS8	Q8TCS8	Polyribonucleotide nucleotidyltransferase 1, mitochondrial	PNPT1
20.8199	17.5043	18.1088	24.1979	24.1966	23.5773	biosynthetic process;cellular metabolic process;cellular process;macromolecule metabolic process;metabolic process;primary metabolic process;protein metabolic process;translation	+	Known mitochondrial	+	DSP crosslinked_Control	2	38.5	7.6191	2.11911	-5.17963	-4.97925	O75394	O75394	39S ribosomal protein L33, mitochondrial	MRPL33
18.6356	21.2168	21.0935	26.0902	26.1861	25.0509	anatomical structure morphogenesis;developmental process	+	Known mitochondrial	+	DSP crosslinked_Control	8	41.7	24.49	2.40085	-5.46039	-5.96228	Q9NQ50	Q9NQ50	39S ribosomal protein L40, mitochondrial	MRPL40
19.1906	18.2792	20.5686	25.8968	25.2905	25.1723	biosynthetic process;cellular metabolic process;cellular process;macromolecule metabolic process;metabolic process;primary metabolic process;protein metabolic process;translation	+	Known mitochondrial	+	DSP crosslinked_Control	8	36	30.243	3.01648	-6.10704	-8.69601	Q9BYD2	Q9BYD2	39S ribosomal protein L9, mitochondrial	MRPL9
20.4315	18.3154	17.0299	25.4584	25.5868	24.7846	biosynthetic process;cellular metabolic process;cellular process;macromolecule metabolic process;metabolic process;primary metabolic process;protein metabolic process;translation	+	Known mitochondrial	+	DSP crosslinked_Control	5	42.6	16.073	2.54846	-6.68432	-6.53784	Q9P0M9	Q9P0M9	39S ribosomal protein L27, mitochondrial	MRPL27
20.2813	19.7374	19.9408	27.7729	27.8546	25.9216	biological regulation;cellular metabolic process;cellular nitrogen compound metabolic process;cellular process;interspecies interaction between organisms;macromolecule metabolic process;metabolic process;mRNA metabolic process;mRNA processing;multi-organism process;nitrogen compound metabolic process;nucleobase-containing compound metabolic process;primary metabolic process;regulation of transpor…		Known mitochondrial	+	DSP crosslinked_Control	15	38.4	50.976	3.41983	-7.19655	-11.0578	P61978	P61978	Heterogeneous nuclear ribonucleoprotein K	HNRNPK

## Sheet: Galactose Xlink
LFQ intensity Ctrl_1	LFQ intensity Ctrl_2	LFQ intensity Ctrl_3	LFQ intensity Xlink_1	LFQ intensity Xlink_2	LFQ intensity Xlink_3	C: Category	C: GOBP slim name	C: MCARTA2_LIST	C: Student's T-test Significant DSP_Control	C: Student's T-test significant	N: Unique peptides	N: Sequence coverage [%]	N: Mol. weight [kDa]	N: -Log Student's T-test p-value DSP_Control	N: Student's T-test Difference DSP_Control	N: Student's T-test Test statistic DSP_Control	T: Protein IDs	T: Majority protein IDs	T: Protein names	T: Gene names
22.0725	23.2445	22.6842	30.3203	30.2569	30.2871	Known mitochondrial		+	+	DSP_Control	19	65.1	32.004	4.63521	7.62101	22.4861	Q96HS1;Q96HS1-2	Q96HS1;Q96HS1-2	Serine/threonine-protein phosphatase PGAM5, mitochondrial	PGAM5
22.0295	22.0061	22.4339	29.569	29.63	29.5639	Known mitochondrial		+	+	DSP_Control	7	44.4	66.217	6.11678	7.43115	52.9022	Q9NVI7-2;Q9NVI7;Q9NVI7-3;Q5T9A4-2	Q9NVI7-2;Q9NVI7;Q9NVI7-3	ATPase family AAA domain-containing protein 3A	ATAD3A
21.7414	22.2542	21.9277	28.6771	28.7094	28.6407	Known mitochondrial		+	+	DSP_Control	4	50.6	9.3435	5.81013	6.70127	44.3304	Q9Y5J9	Q9Y5J9	Mitochondrial import inner membrane translocase subunit Tim8 B	TIMM8B
21.8502	22.4623	23.1181	28.8461	28.8585	28.81	Known mitochondrial		+	+	DSP_Control	26	45.9	75.448	4.18996	6.36133	17.3637	Q9H078-2;Q9H078;Q9H078-3;Q9H078-4;Q9H078-5	Q9H078-2;Q9H078;Q9H078-3;Q9H078-4;Q9H078-5	Caseinolytic peptidase B protein homolog	CLPB
21.6366	22.1135	22.0805	28.2	28.1355	28.1538	Known mitochondrial		+	+	DSP_Control	11	36.1	26.152	5.63777	6.21956	40.1357	Q9NX63	Q9NX63	MICOS complex subunit MIC19	CHCHD3
21.2822	21.6072	21.2499	27.2502	27.1807	27.2519	Known mitochondrial			+	DSP_Control	22	28.5	107.57	6.02562	5.84781	50.1943	O60313-13;O60313;O60313-9;O60313-11;O60313-2;O60313-10	O60313-13;O60313;O60313-9;O60313-11;O60313-2;O60313-10	Dynamin-like 120 kDa protein, mitochondrial;Dynamin-like 120 kDa protein, form S1	OPA1
22.7433	22.6856	21.7439	28.1906	28.0518	28.0402	Known mitochondrial		+	+	DSP_Control	3	47.7	10.192	4.19482	5.70327	17.4129	P14854	P14854	Cytochrome c oxidase subunit 6B1	COX6B1
22.8919	21.91	21.4211	27.7125	27.6201	27.5732	Known mitochondrial		+	+	DSP_Control	9	50.4	25.614	3.66832	5.56093	12.8012	P54819-2;P54819;P54819-3;P54819-5;P54819-6;P54819-4	P54819-2;P54819;P54819-3;P54819-5;P54819-6;P54819-4	Adenylate kinase 2, mitochondrial;Adenylate kinase 2, mitochondrial, N-terminally processed	AK2
20.7401	22.4642	22.0593	26.7832	26.9839	26.9207	Known mitochondrial		+	+	DSP_Control	4	34.4	31.362	3.2188	5.14141	9.8145	Q07021	Q07021	Complement component 1 Q subcomponent-binding protein, mitochondrial	C1QBP
21.7869	20.5484	22.5763	26.6989	26.7641	26.6934	Known mitochondrial		+	+	DSP_Control	5	70.1	10.134	2.99884	5.08157	8.6043	Q9NYJ1;Q9NYJ1-2	Q9NYJ1;Q9NYJ1-2	Cytochrome c oxidase assembly factor 4 homolog, mitochondrial	COA4
22.0062	21.7787	20.687	26.5915	26.5111	26.5963	Known mitochondrial		+	+	DSP_Control	33	26.8	157.9	3.61939	5.07567	12.4384	P42704	P42704	Leucine-rich PPR motif-containing protein, mitochondrial	LRPPRC
22.7676	22.683	23.0721	27.7733	27.7188	27.8975	Known mitochondrial		+	+	DSP_Control	25	39.4	74.175	5.55575	4.95562	38.2808	Q9UJS0;Q9UJS0-2;O75746-2;O75746	Q9UJS0;Q9UJS0-2	Calcium-binding mitochondrial carrier protein Aralar2	SLC25A13
22.3896	21.4375	21.3936	26.7492	26.6837	26.6389	Known mitochondrial		+	+	DSP_Control	16	27.1	75.981	3.95728	4.95035	15.1612	Q96TA2-3;Q96TA2-2;Q96TA2	Q96TA2-3;Q96TA2-2;Q96TA2	ATP-dependent zinc metalloprotease YME1L1	YME1L1
21.0229	22.5541	22.7154	26.7812	26.7347	26.7673	Known mitochondrial		+	+	DSP_Control	4	33.8	15.512	3.00658	4.6636	8.64444	Q9Y6H1;Q5T1J5	Q9Y6H1;Q5T1J5	Coiled-coil-helix-coiled-coil-helix domain-containing protein 2;Putative coiled-coil-helix-coiled-coil-helix domain-containing protein CHCHD2P9, mitochondrial	CHCHD2;CHCHD2P9
21.8168	21.4141	22.5331	26.5375	26.5114	26.6112	Known mitochondrial		+	+	DSP_Control	8	39	25.709	3.83272	4.63202	14.0964	Q96BR5	Q96BR5	Cytochrome c oxidase assembly factor 7	COA7
21.8859	22.9375	22.4019	26.7235	26.8752	26.7805	Known mitochondrial		+	+	DSP_Control	13	36.5	51.976	3.85628	4.38463	14.2922	Q9Y512	Q9Y512	Sorting and assembly machinery component 50 homolog	SAMM50
23.0891	21.9328	22.5701	26.7454	26.6733	26.6682	Known mitochondrial		+	+	DSP_Control	5	45.7	11.749	3.61717	4.16494	12.4222	P99999	P99999	Cytochrome c	CYCS
21.8079	21.5457	21.6291	25.8751	25.7784	25.8052	Known mitochondrial		+	+	DSP_Control	6	40.1	72.572	6.03255	4.15866	50.3954	Q5T9A4;Q5T9A4-3	Q5T9A4;Q5T9A4-3	ATPase family AAA domain-containing protein 3B	ATAD3B
21.8338	21.8088	22.7069	26.2862	26.2481	26.2604	Known mitochondrial		+	+	DSP_Control	11	30.2	50.151	3.82559	4.14839	14.0378	P36551;P36551-2	P36551;P36551-2	Oxygen-dependent coproporphyrinogen-III oxidase, mitochondrial	CPOX
23.9959	24.109	23.6945	31.2065	26.5236	26.4866	Known mitochondrial		+			2	47.5	82.624	1.23651	4.13907	2.63292	Q16891-2;Q16891;Q16891-3	Q16891-2;Q16891;Q16891-3	MICOS complex subunit MIC60	IMMT
22.5396	22.4811	21.8945	26.385	26.451	26.4314	Known mitochondrial		+	+	DSP_Control	5	54.4	9.4275	4.42452	4.11739	19.8998	Q5JTJ3-3;Q5JTJ3;Q5JTJ3-2	Q5JTJ3-3;Q5JTJ3;Q5JTJ3-2	Cytochrome c oxidase assembly factor 6 homolog	COA6
22.7319	20.8602	21.2495	25.7664	25.7184	25.6766	Known mitochondrial		+	+	DSP_Control	4	31.2	15.641	2.70383	4.10662	7.19456	Q96C01	Q96C01	Protein FAM136A	FAM136A
22.2959	21.3012	23.6356	26.5636	26.3566	26.5068	Known mitochondrial		+	+	DSP_Control	8	53.2	21.232	2.40697	4.06477	5.98524	Q9NR28-2;Q9NR28;Q9NR28-3	Q9NR28-2;Q9NR28;Q9NR28-3	Diablo homolog, mitochondrial	DIABLO
22.4693	21.6459	22.2484	26.2009	26.0912	26.1369	Known mitochondrial		+	+	DSP_Control	3	29.7	10.739	4.07198	4.02182	16.2105	P07919	P07919	Cytochrome b-c1 complex subunit 6, mitochondrial	UQCRH
22.3085	23.5918	22.2726	26.6146	26.6019	26.5348	Known mitochondrial		+	+	DSP_Control	5	15.5	48.442	3.05156	3.85948	8.88112	P22695	P22695	Cytochrome b-c1 complex subunit 2, mitochondrial	UQCRC2
20.5927	22.0399	21.0165	24.9235	24.8386	24.9424	Known mitochondrial		+	+	DSP_Control	4	17.2	33.331	2.98937	3.68513	8.55541	Q9Y6C9	Q9Y6C9	Mitochondrial carrier homolog 2	MTCH2
21.3285	21.5714	22.3787	25.3231	25.1948	25.3865	Known mitochondrial		+	+	DSP_Control	7	28.7	38.534	3.40896	3.54196	10.9869	Q9UJZ1;Q9UJZ1-2	Q9UJZ1;Q9UJZ1-2	Stomatin-like protein 2, mitochondrial	STOML2
22.2178	21.9066	21.5716	25.2654	25.2959	25.2145	Known mitochondrial		+	+	DSP_Control	4	20.1	19.576	4.23877	3.35994	17.8638	P13073	P13073	Cytochrome c oxidase subunit 4 isoform 1, mitochondrial	COX4I1
22.59	21.364	23.3412	25.7499	25.7502	25.7189	Known mitochondrial		+	+	DSP_Control	4	38.9	16.62	2.34056	3.30793	5.73973	Q4VC31	Q4VC31	Coiled-coil domain-containing protein 58	CCDC58
22.4332	23.0601	20.8152	25.2215	25.3724	25.2466	Known mitochondrial		+	+	DSP_Control	9	20.3	57.196	2.04379	3.17734	4.73945	Q9NVH1-3;Q9NVH1-2;Q9NVH1	Q9NVH1-3;Q9NVH1-2;Q9NVH1	DnaJ homolog subfamily C member 11	DNAJC11
21.7715	21.7149	21.2183	24.5634	24.6359	24.8669	Known mitochondrial		+	+	DSP_Control	6	37	26.457	4.0225	3.12054	15.7495	Q9BRQ6	Q9BRQ6	MICOS complex subunit MIC25	CHCHD6
21.1658	22.2788	21.7107	24.699	24.8695	24.5993	Known mitochondrial		+	+	DSP_Control	7	30.3	32.62	3.08838	3.00414	9.07926	Q14249	Q14249	Endonuclease G, mitochondrial	ENDOG
22.4818	21.3125	22.0715	24.9147	24.6072	24.8408	Predicted mitochondrial			+	DSP_Control	11	31.3	56.782	2.87436	2.83228	7.98167	P30101	P30101	Protein disulfide-isomerase A3	PDIA3
25.7236	23.2506	23.8117	26.7318	27.2074	26.9652	Known mitochondrial		+	+	DSP_Control	13	32.7	56.559	1.62574	2.70612	3.55588	P06576	P06576	ATP synthase subunit beta, mitochondrial	ATP5B
23.9383	24.2619	24.7558	26.9789	27.0063	26.7242	Predicted mitochondrial			+	DSP_Control	17	22.8	92.468	3.27881	2.58446	10.1711	P14625;Q58FF3	P14625	Endoplasmin	HSP90B1
21.4329	24.7631	21.0786	24.84	25.0612	25.1162	Known mitochondrial		+			3	17.3	34.441	1.03003	2.58094	2.19357	O96008-2;O96008	O96008-2;O96008	Mitochondrial import receptor subunit TOM40 homolog	TOMM40
22.2378	22.5077	20.6462	24.4153	24.1062	24.4037	Known mitochondrial		+	+	DSP_Control	5	18	49.666	1.88419	2.51116	4.25977	Q8IYU8	Q8IYU8	Calcium uptake protein 2, mitochondrial	MICU2
25.0275	22.6469	21.9088	25.0919	25.7894	25.9958	Known mitochondrial		+			6	52.9	10.932	1.16666	2.43132	2.4811	P61604	P61604	10 kDa heat shock protein, mitochondrial	HSPE1
22.8868	21.9798	23.1838	24.9471	25.2248	25.0337	Known mitochondrial		+	+	DSP_Control	7	26.6	46.381	2.51995	2.38507	6.42314	O43464-3;O43464;O43464-2;O43464-4;P83110-2;P83110	O43464-3;O43464;O43464-2	Serine protease HTRA2, mitochondrial	HTRA2
22.3363	21.9631	22.0721	24.3504	24.5344	24.3543	Known mitochondrial		+	+	DSP_Control	5	13.1	27.626	4.26346	2.28919	18.1222	Q9NX40;Q9NX40-3;Q9NX40-2;Q9NX40-4	Q9NX40	OCIA domain-containing protein 1	OCIAD1
24.6809	25.0653	21.1433	25.6814	25.9235	25.9029	Known mitochondrial		+			11	23.5	66.294	0.816732	2.20609	1.76402	O95831-3;O95831;O95831-6;O95831-4;O95831-2;O95831-5	O95831-3;O95831;O95831-6;O95831-4	Apoptosis-inducing factor 1, mitochondrial	AIFM1
21.5516	22.2137	21.1337	23.7609	23.8674	23.8667	Predicted mitochondrial		+	+	DSP_Control	7	43.3	25.035	2.64718	2.19868	6.94877	P30041	P30041	Peroxiredoxin-6	PRDX6
21.9639	22.0836	21.2471	23.8659	23.9519	23.9913	Known mitochondrial		+	+	DSP_Control	2	18.9	12.49	2.92538	2.1715	8.23174	Q7Z7K0	Q7Z7K0	COX assembly mitochondrial protein homolog	CMC1
21.2214	22.0268	23.2877	24.3836	24.3106	24.3026	Known mitochondrial			+	DSP_Control	4	12.9	48.141	1.63449	2.15368	3.57837	P27797	P27797	Calreticulin	CALR
21.8711	21.5641	22.1098	24.1623	23.9313	23.8833	Known mitochondrial		+	+	DSP_Control	4	23.6	30.54	3.54677	2.14397	11.9179	Q13162	Q13162	Peroxiredoxin-4	PRDX4
20.243	22.5052	20.8071	23.1997	23.2671	23.3193	Known mitochondrial		+	+	DSP_Control	3	38.2	12.395	1.42035	2.07694	3.05108	Q9BSY4;Q9BSY4-2	Q9BSY4;Q9BSY4-2	Coiled-coil-helix-coiled-coil-helix domain-containing protein 5	CHCHD5
21.6508	22.9369	22.5126	24.1707	24.6116	24.509	Known mitochondrial			+	DSP_Control	6	35.1	26.099	2.16946	2.06369	5.14468	O00165-5;O00165;O00165-2;O00165-3;O00165-4;O00165-6	O00165-5;O00165;O00165-2;O00165-3;O00165-4	HCLS1-associated protein X-1	HAX1
21.0724	26.1963	21.8651	25.0223	25.3428	24.8161	Known mitochondrial		+			10	21.5	48.879	0.558867	2.01578	1.26008	P55084-2;P55084	P55084-2;P55084	Trifunctional enzyme subunit beta, mitochondrial;3-ketoacyl-CoA thiolase	HADHB
21.5469	21.9905	22.819	23.9883	24.0782	24.0706	Known mitochondrial		+	+	DSP_Control	6	12	51.712	2.1722	1.92692	5.15383	O75390	O75390	Citrate synthase, mitochondrial	CS
21.8716	22.6315	21.7278	24.0349	23.9978	23.9347	Known mitochondrial		+	+	DSP_Control	4	35.8	12.517	2.6081	1.91218	6.78347	O43920	O43920	NADH dehydrogenase [ubiquinone] iron-sulfur protein 5	NDUFS5
22.3842	21.6233	22.0678	23.8184	23.9029	24.06	Known mitochondrial		+	+	DSP_Control	5	17.4	42.456	2.92031	1.90201	8.20657	Q6DKK2	Q6DKK2	Tetratricopeptide repeat protein 19, mitochondrial	TTC19
21.8609	21.4619	21.0363	23.2741	23.3985	23.2858	Predicted mitochondrial		+	+	DSP_Control	7	23.9	35.932	2.82214	1.86645	7.73284	Q8NBN7;Q8NBN7-2	Q8NBN7;Q8NBN7-2	Retinol dehydrogenase 13	RDH13
21.1434	21.1525	22.2453	23.1249	23.8088	23.0933	Known mitochondrial		+	+	DSP_Control	1	42.9	83.548	1.86827	1.82863	4.21392	Q16891-4	Q16891-4	MICOS complex subunit MIC60	IMMT
28.0011	27.9335	28.1544	29.857	29.8006	29.8568	Known mitochondrial		+	+	DSP_Control	14	65.4	29.804	4.92567	1.80848	26.6033	P35232;P35232-2	P35232;P35232-2	Prohibitin	PHB
21.0613	21.9188	23.2447	23.769	23.863	23.8919	Known mitochondrial		+	+	DSP_Control	8	14	67.454	1.30104	1.76638	2.77648	O94826	O94826	Mitochondrial import receptor subunit TOM70	TOMM70A
22.2085	22.0656	22.3363	24.0155	23.8849	23.8133	Known mitochondrial		+	+	DSP_Control	5	21.9	33.814	4.18825	1.70111	17.3464	O75880	O75880	Protein SCO1 homolog, mitochondrial	SCO1
21.8213	21.885	21.6019	23.2044	23.6538	23.3539	Known mitochondrial		+	+	DSP_Control	2	17.3	20.143	3.3125	1.63463	10.3767	O96000-2;O96000	O96000-2;O96000	NADH dehydrogenase [ubiquinone] 1 beta subcomplex subunit 10	NDUFB10
28.4287	28.4852	28.4309	30.0786	30.0271	30.0285	Known mitochondrial		+	+	DSP_Control	16	61.2	33.296	6.43845	1.59645	63.6754	Q99623;Q99623-2	Q99623;Q99623-2	Prohibitin-2	PHB2
21.3009	22.1853	22.2819	23.4975	23.5309	23.4655	Known mitochondrial		+	+	DSP_Control	4	13.9	39.646	2.13703	1.57524	5.03767	Q3ZCQ8;Q3ZCQ8-2;Q3ZCQ8-3	Q3ZCQ8;Q3ZCQ8-2;Q3ZCQ8-3	Mitochondrial import inner membrane translocase subunit TIM50	TIMM50
21.5757	20.9899	21.6735	22.8916	23.1177	22.8951	Known mitochondrial		+	+	DSP_Control	2	5.9	30.847	2.62996	1.55513	6.87552	Q96DB5-3;Q96DB5-2;Q96DB5	Q96DB5-3;Q96DB5-2;Q96DB5	Regulator of microtubule dynamics protein 1	RMDN1
25.1322	25.2193	26.016	27.104	27.1267	26.7554	Predicted mitochondrial			+	DSP_Control	16	31.7	72.332	2.13595	1.53955	5.03411	P11021	P11021	78 kDa glucose-regulated protein	HSPA5
21.8024	22.971	22.7133	24.0553	24.0517	23.9487	Known mitochondrial		+	+	DSP_Control	6	9.3	85.64	1.88973	1.52299	4.27581	P36776-3;P36776-2;P36776	P36776-3;P36776-2;P36776	Lon protease homolog, mitochondrial	LONP1
22.1179	21.9987	22.8119	23.8087	23.9845	23.656	Predicted mitochondrial		+	+	DSP_Control	4	24.5	36.053	2.29232	1.50692	5.56662	P04406;P04406-2	P04406;P04406-2	Glyceraldehyde-3-phosphate dehydrogenase	GAPDH
22.0931	20.5424	23.2337	23.3642	23.3926	23.4186	Known mitochondrial		+			3	10.9	46.588	0.855133	1.43537	1.84003	P11310;P11310-2	P11310;P11310-2	Medium-chain specific acyl-CoA dehydrogenase, mitochondrial	ACADM
21.9591	21.3149	21.6916	23.1745	23.0302	22.981	Known mitochondrial		+	+	DSP_Control	4	13.9	45.811	2.70254	1.40668	7.18888	Q96ER9;Q96ER9-2	Q96ER9;Q96ER9-2	Coiled-coil domain-containing protein 51	CCDC51
22.1767	23.1135	22.2189	24.0107	23.8008	23.899	Known mitochondrial		+	+	DSP_Control	3	17.3	16.762	1.96454	1.40046	4.4966	P20674	P20674	Cytochrome c oxidase subunit 5A, mitochondrial	COX5A
22.0388	20.8549	21.7899	22.7185	22.9936	22.9022	Known mitochondrial		+	+	DSP_Control	2	20.1	17.442	1.62239	1.31023	3.54729	Q9BYC9;Q9BYC9-2	Q9BYC9;Q9BYC9-2	39S ribosomal protein L20, mitochondrial	MRPL20
22.1725	23.1287	22.3664	23.8701	23.7246	23.9966	Known mitochondrial		+	+	DSP_Control	5	28.7	29.159	1.90744	1.3079	4.32737	Q6UXV4	Q6UXV4	MICOS complex subunit MIC27	APOOL
28.5799	28.7065	28.5272	29.779	29.8936	29.7572	Known mitochondrial		+	+	DSP_Control	19	51.1	45.199	4.22643	1.2054	17.7361	P24752;P24752-2	P24752	Acetyl-CoA acetyltransferase, mitochondrial	ACAT1
22.1134	21.3686	21.7917	22.7285	23.1825	22.8494	Predicted mitochondrial			+	DSP_Control	7	8.3	111.33	1.98578	1.16223	4.56075	Q9Y4L1;Q9Y4L1-2	Q9Y4L1;Q9Y4L1-2	Hypoxia up-regulated protein 1	HYOU1
22.2488	21.2548	22.8934	23.3219	23.1084	23.2536	Known mitochondrial		+			3	13.8	30.601	1.07126	1.09563	2.27914	P53701	P53701	Cytochrome c-type heme lyase	HCCS
21.9145	22.9672	22.0516	23.5445	23.3933	23.2808	Known mitochondrial		+	+	DSP_Control	2	15.7	22.284	1.49479	1.09509	3.22905	Q9BUR5;Q9BUR5-2	Q9BUR5;Q9BUR5-2	Apolipoprotein O	APOO
21.2038	21.7986	21.6146	22.5249	22.817	22.4497	Known mitochondrial		+	+	DSP_Control	5	12.2	51.355	2.14867	1.0582	5.07587	O43615	O43615	Mitochondrial import inner membrane translocase subunit TIM44	TIMM44
22.1414	22.0129	22.1884	23.7127	22.7416	23.0015	Known mitochondrial		+	+	DSP_Control	3	15.3	34.293	1.61109	1.03773	3.5184	Q16836;Q16836-3;Q16836-2	Q16836;Q16836-3;Q16836-2	Hydroxyacyl-coenzyme A dehydrogenase, mitochondrial	HADH
28.3738	28.4876	27.7355	29.4031	29.2235	28.998	Known mitochondrial		+	+	DSP_Control	24	49.9	61.054	1.73955	1.00926	3.85558	P10809;P10809-2	P10809	60 kDa heat shock protein, mitochondrial	HSPD1
21.8751	23.1837	21.4764	23.3607	23.3088	22.8212	Known mitochondrial		+			5	12.7	65.459	0.841199	0.985159	1.81239	O94925-3;O94925;O94925-2	O94925-3;O94925	Glutaminase kidney isoform, mitochondrial	GLS
22.2448	23.3353	25.1356	24.5391	24.5472	24.5727	Known mitochondrial					3	13.6	36.876	0.509837	0.981109	1.16393	Q14257;Q14257-2	Q14257;Q14257-2	Reticulocalbin-2	RCN2
20.969	21.9701	21.1361	22.3099	22.3584	22.3069	Known mitochondrial		+	+	DSP_Control	2	19	23.449	1.44842	0.966658	3.11755	P55789;P55789-2	P55789;P55789-2	FAD-linked sulfhydryl oxidase ALR	GFER
21.8415	21.9228	22.5928	23.1034	23.0342	23.0025	Known mitochondrial		+	+	DSP_Control	3	18.2	16.953	1.74381	0.927666	3.86708	Q56VL3;Q56VL3-2	Q56VL3	OCIA domain-containing protein 2	OCIAD2
25.5606	25.4964	24.7927	26.2806	25.9804	26.2338	Known mitochondrial		+	+	DSP_Control	13	34.9	47.517	1.54477	0.88169	3.35165	P00505;P00505-2	P00505;P00505-2	Aspartate aminotransferase, mitochondrial	GOT2
22.3014	20.682	21.7631	22.4288	22.3406	22.6096	Known mitochondrial		+			3	3.6	88.583	0.843947	0.877463	1.81784	Q9Y4W6;Q01484-5;Q01484-2;Q01484	Q9Y4W6	AFG3-like protein 2	AFG3L2
22.5359	21.1284	21.6662	22.5443	22.7229	22.67	Known mitochondrial		+			3	8.5	33.31	0.98514	0.868901	2.10147	Q9BPW8	Q9BPW8	Protein NipSnap homolog 1	NIPSNAP1
28.6643	28.7448	28.6822	29.6168	29.543	29.4116	Known mitochondrial		+	+	DSP_Control	7	78.9	10.5	3.66307	0.82671	12.7618	Q9Y5L4	Q9Y5L4	Mitochondrial import inner membrane translocase subunit Tim13	TIMM13
22.1877	22.6577	22.0727	23.0644	23.188	23.1446	Known mitochondrial		+	+	DSP_Control	3	23.7	21.348	1.97429	0.826325	4.52597	P52815	P52815	39S ribosomal protein L12, mitochondrial	MRPL12
21.6701	22.0789	21.41	22.4972	22.7961	22.3408	Known mitochondrial		+	+	DSP_Control	3	6.7	53.354	1.60176	0.825059	3.49465	Q6NUK1;Q6NUK1-2	Q6NUK1;Q6NUK1-2	Calcium-binding mitochondrial carrier protein SCaMC-1	SLC25A24
25.1821	24.8268	25.0815	25.9081	25.9918	25.5814	Known mitochondrial		+	+	DSP_Control	15	23.2	87.088	2.08289	0.796979	4.86281	P54886-2;P54886	P54886-2;P54886	Delta-1-pyrroline-5-carboxylate synthase;Glutamate 5-kinase;Gamma-glutamyl phosphate reductase	ALDH18A1
20.8378	21.6769	21.2424	22.133	21.8972	21.9345	Known mitochondrial		+	+	DSP_Control	3	7.7	34.012	1.35865	0.73586	2.90749	P53007	P53007	Tricarboxylate transport protein, mitochondrial	SLC25A1
21.0638	22.1447	21.7575	22.5655	22.3336	22.0879	Known mitochondrial		+			2	19.8	20.105	0.911638	0.673597	1.95279	P51970	P51970	NADH dehydrogenase [ubiquinone] 1 alpha subcomplex subunit 8	NDUFA8
22.5243	25.7942	25.3948	24.6949	25.6162	25.3287	Known mitochondrial		+			11	23.8	53.454	0.237206	0.642115	0.602794	P34897-3;P34897-2;P34897	P34897-3;P34897-2;P34897	Serine hydroxymethyltransferase, mitochondrial	SHMT2
23.7598	22.4483	22.4412	23.5715	23.4043	23.4514	Known mitochondrial					3	8.4	50.212	0.601515	0.592671	1.34333	P07954-2;P07954	P07954-2;P07954	Fumarate hydratase, mitochondrial	FH
21.9697	21.4045	22.0746	22.4308	22.3979	22.3721	Known mitochondrial		+	+	DSP_Control	4	4.8	115.51	1.31012	0.584017	2.79693	Q02218-2;Q02218;Q02218-3;Q9ULD0-3;Q9ULD0-2;Q9ULD0	Q02218-2;Q02218;Q02218-3;Q9ULD0-3;Q9ULD0-2;Q9ULD0	2-oxoglutarate dehydrogenase, mitochondrial;2-oxoglutarate dehydrogenase-like, mitochondrial	OGDH;OGDHL
21.1167	22.2662	23.6418	22.8815	22.9871	22.868	Known mitochondrial					3	8	65.443	0.320063	0.570653	0.780772	P23368;P23368-2	P23368;P23368-2	NAD-dependent malic enzyme, mitochondrial	ME2
22.1585	22.0566	21.723	22.5383	22.5082	22.5909	Known mitochondrial		+	+	DSP_Control	5	14.1	56.381	1.87625	0.56645	4.23687	P05091;P05091-2	P05091;P05091-2	Aldehyde dehydrogenase, mitochondrial	ALDH2
21.9486	21.9887	23.0492	22.6813	22.8737	22.7354	Known mitochondrial		+			3	6.9	60.693	0.523668	0.434623	1.19112	P83111;P83111-2	P83111	Serine beta-lactamase-like protein LACTB, mitochondrial	LACTB
21.5474	22.5419	22.3258	22.7911	22.3536	22.5649	Predicted mitochondrial					3	13.9	57.548	0.588611	0.431513	1.31817	P49257	P49257	Protein ERGIC-53	LMAN1
21.1986	24.4858	21.3453	22.9691	22.5236	22.7653	Known mitochondrial		+			6	28.9	25.65	0.140373	0.409455	0.379195	P82930	P82930	28S ribosomal protein S34, mitochondrial	MRPS34
22.0345	21.991	22.8102	22.729	22.6442	22.6269	Known mitochondrial		+			2	18.4	8.7858	0.655478	0.388132	1.44846	O43715	O43715	TP53-regulated inhibitor of apoptosis 1	TRIAP1
21.2383	21.8505	21.7439	21.9751	21.9296	21.8777	Known mitochondrial		+			2	32.1	8.8081	0.762874	0.316566	1.65811	Q5TGZ0;Q5TGZ0-2	Q5TGZ0;Q5TGZ0-2	MICOS complex subunit MIC10	MINOS1
22.6105	21.5802	21.1403	22.1546	22.1009	21.912	Known mitochondrial		+			3	12.3	33.081	0.25007	0.278839	0.631081	Q96EY1-3;Q96EY1-2;Q96EY1	Q96EY1-3;Q96EY1-2;Q96EY1	DnaJ homolog subfamily A member 3, mitochondrial	DNAJA3
24.5211	22.7152	25.2953	24.4029	24.4081	24.4237	Known mitochondrial		+			4	45.8	15.996	0.110996	0.234352	0.306567	Q8N4Q1;Q8N4Q1-2	Q8N4Q1;Q8N4Q1-2	Mitochondrial intermembrane space import and assembly protein 40	CHCHD4
22.0946	22.4183	22.2251	21.9352	22.9479	22.4495	Predicted mitochondrial					2	5.5	58.061	0.256645	0.198211	0.645435	P14618-2;P14618	P14618-2;P14618	Pyruvate kinase PKM	PKM
24.4482	21.578	24.6978	23.7496	23.8144	23.705	Known mitochondrial		+			6	9.9	83.471	0.0630614	0.1817	0.18144	Q96RP9;Q96RP9-2	Q96RP9;Q96RP9-2	Elongation factor G, mitochondrial	GFM1
21.4455	22.2622	21.7494	21.9418	22.0525	22.0053	Known mitochondrial		+			3	10.5	43.113	0.306425	0.180862	0.752098	Q9NQZ5	Q9NQZ5	StAR-related lipid transfer protein 7, mitochondrial	STARD7
21.9095	21.2007	22.4585	22.0471	22.186	21.8707	Known mitochondrial		+			4	9.3	58.252	0.180837	0.178353	0.475213	Q10713;Q10713-2	Q10713;Q10713-2	Mitochondrial-processing peptidase subunit alpha	PMPCA
23.1763	21.8383	21.3427	22.3209	22.1873	22.3367	Known mitochondrial		+			2	11.1	33.34	0.106705	0.162547	0.295721	P32322-2;P32322;P32322-3	P32322-2;P32322;P32322-3	Pyrroline-5-carboxylate reductase 1, mitochondrial	PYCR1
22.1005	22.0151	21.1163	21.8961	21.8859	21.7948	Known mitochondrial		+			4	21.5	28.134	0.133779	0.114905	0.363124	Q9Y2R9	Q9Y2R9	28S ribosomal protein S7, mitochondrial	MRPS7
26.6952	26.6485	26.4944	26.6977	26.6884	26.7252	Known mitochondrial		+			11	32.9	47.036	0.669831	0.0910479	1.47641	P12532;P12532-2;P17540	P12532;P12532-2	Creatine kinase U-type, mitochondrial	CKMT1A
22.5572	22.1069	21.4666	22.4988	21.1203	22.7247	Known mitochondrial		+			2	10.5	29.052	0.040777	0.0710615	0.11985	O75323-2;O75323	O75323-2;O75323	Protein NipSnap homolog 2	GBAS
23.4176	21.1221	23.6987	22.5941	23.1797	22.5187	Predicted mitochondrial					1	8.7	83.263	0.00702304	0.0180181	0.0213902	P08238	P08238	Heat shock protein HSP 90-beta	HSP90AB1
21.7686	21.7618	21.1007	21.538	21.5706	21.5171	Known mitochondrial		+			3	8.6	52.545	0.00264809	-0.0017999	-0.00810532	O75306;O75306-2	O75306;O75306-2	NADH dehydrogenase [ubiquinone] iron-sulfur protein 2, mitochondrial	NDUFS2
22.2734	21.3487	21.9806	21.6195	22.0001	21.7153	Known mitochondrial		+			4	49.3	8.7813	0.109147	-0.0893122	-0.301902	P09669	P09669	Cytochrome c oxidase subunit 6C	COX6C
21.922	22.0992	21.679	22.6949	19.8652	22.8004	Known mitochondrial		+			3	8.8	60.282	0.0397196	-0.113241	-0.116865	P51687	P51687	Sulfite oxidase, mitochondrial	SUOX
22.2378	22.3296	23.4058	23.0838	22.3794	22.1676	Known mitochondrial		+			4	7.1	87.99	0.086882	-0.114093	-0.244758	Q8IYB8	Q8IYB8	ATP-dependent RNA helicase SUPV3L1, mitochondrial	SUPV3L1
23.221	22.898	21.8062	22.598	22.5242	22.46	Known mitochondrial		+			6	11.6	83.353	0.0950637	-0.114342	-0.265971	O95202;O95202-2;O95202-3	O95202	LETM1 and EF-hand domain-containing protein 1, mitochondrial	LETM1
21.8709	21.6258	22.9298	22.0152	22.0124	22.0237	Known mitochondrial		+			3	5.2	69.223	0.113387	-0.125079	-0.312582	O76031	O76031	ATP-dependent Clp protease ATP-binding subunit clpX-like, mitochondrial	CLPX
22.0298	21.4071	21.9707	21.5343	21.6109	21.7234	Known mitochondrial		+			5	23.5	20.658	0.364362	-0.179649	-0.872554	O00746;O00746-2	O00746	Nucleoside diphosphate kinase, mitochondrial	NME4
21.8814	22.1151	23.4673	22.353	22.3187	22.2166	Known mitochondrial		+			7	17.1	61.118	0.143493	-0.191829	-0.386753	Q9H857-3;Q9H857-2;Q9H857-4;Q9H857	Q9H857-3;Q9H857-2;Q9H857-4;Q9H857	5-nucleotidase domain-containing protein 2	NT5DC2
23.2053	21.8373	24.0872	22.8312	22.6019	23.1123	Known mitochondrial		+			4	7.2	85.424	0.104568	-0.194778	-0.290297	Q99798	Q99798	Aconitate hydratase, mitochondrial	ACO2
23.782	24.2173	21.5454	22.8244	22.9874	22.9971	Known mitochondrial		+			2	32.1	49.83	0.106683	-0.245275	-0.295666	P68371;P04350;Q13509-2;Q3ZCM7;A6NNZ2;Q9BUF5;CON__ENSEMBL:ENSBTAP00000025008;Q9H4B7	P68371;P04350;Q13509-2	Tubulin beta-4B chain;Tubulin beta-4A chain;Tubulin beta-3 chain	TUBB4B;TUBB4A;TUBB3
22.9182	22.6292	21.2357	20.1559	22.9184	22.9553	Known mitochondrial		+			3	11.8	35.619	0.083669	-0.251164	-0.236356	Q9H9B4	Q9H9B4	Sideroflexin-1	SFXN1
21.7548	21.0021	22.6562	21.5844	21.4543	21.5971	Known mitochondrial		+			2	3.6	68.996	0.20884	-0.259087	-0.539385	P10515	P10515	Dihydrolipoyllysine-residue acetyltransferase component of pyruvate dehydrogenase complex, mitochondrial	DLAT
25.5767	25.4186	25.3875	25.277	25.1586	24.9924	Known mitochondrial			+	DSP_Control	11	21	74.267	1.45965	-0.318238	-3.14435	Q12931-2;Q12931	Q12931-2;Q12931	Heat shock protein 75 kDa, mitochondrial	TRAP1
23.1163	22.1741	21.8032	21.8852	22.1865	22.0073	Predicted mitochondrial					4	3.2	187.89	0.350704	-0.338202	-0.84446	Q00610-2;Q00610;P53675-2;P53675	Q00610-2;Q00610	Clathrin heavy chain 1	CLTC
25.8504	21.4096	25.1835	25.0914	21.1423	25.1644	Known mitochondrial		+			5	32.4	25.838	0.0631606	-0.348436	-0.181708	P30048-2;P30048	P30048-2;P30048	Thioredoxin-dependent peroxide reductase, mitochondrial	PRDX3
25.749	25.6764	25.5663	25.2098	25.1988	25.0923	Predicted mitochondrial			+	DSP_Control	7	36.6	23.742	2.80347	-0.496915	-7.64561	P23284	P23284	Peptidyl-prolyl cis-trans isomerase B	PPIB
28.3362	28.4097	28.1833	27.7564	27.7473	27.7317	Known mitochondrial		+	+	DSP_Control	22	42.3	57.116	2.96187	-0.564589	-8.41492	P07237	P07237	Protein disulfide-isomerase	P4HB
23.4111	22.2105	21.8162	21.6465	21.8963	21.7216	Known mitochondrial		+			2	5.3	41.943	0.678277	-0.724497	-1.49287	Q9H7Z7	Q9H7Z7	Prostaglandin E synthase 2;Prostaglandin E synthase 2 truncated form	PTGES2
22.6535	21.9949	22.2687	21.3829	21.4648	21.7967	Known mitochondrial		+	+	DSP_Control	3	8.7	48.117	1.5263	-0.75754	-3.30605	Q9BZE1	Q9BZE1	39S ribosomal protein L37, mitochondrial	MRPL37
26.9823	26.6437	26.7992	26.0627	26.1385	25.9291	Predicted mitochondrial			+	DSP_Control	9	41.8	37.217	2.57062	-0.76498	-6.62822	P68363-2;Q71U36-2;Q71U36;P68363;P0DPH8;P0DPH7;Q6PEY2;P0DPH7-2;P68366-2;P68366;Q9BQE3;Q9NY65-2;Q9NY65;A6NHL2-2;A6NHL2	P68363-2;Q71U36-2;Q71U36;P68363;P0DPH8;P0DPH7;Q6PEY2;P0DPH7-2;P68366-2;P68366;Q9BQE3;Q9NY65-2;Q9NY65	Tubulin alpha-1B chain;Tubulin alpha-1A chain;Tubulin alpha-3E chain;Tubulin alpha-4A chain;Tubulin alpha-1C chain;Tubulin alpha-8 chain	TUBA1B;TUBA1A;TUBA3E;TUBA4A;TUBA1C;TUBA8
27.1657	27.4199	27.2747	26.5007	26.4688	26.4466	Known mitochondrial		+	+	DSP_Control	14	33.2	50.909	3.38376	-0.814725	-10.8242	P48735;P48735-2;O75874	P48735;P48735-2	Isocitrate dehydrogenase [NADP], mitochondrial	IDH2
21.7298	22.9237	21.5942	21.6129	21.048	21.0744	Known mitochondrial		+			5	4.5	116.94	0.8439	-0.837497	-1.81775	A3KMH1-2;A3KMH1-3;A3KMH1	A3KMH1-2;A3KMH1-3;A3KMH1	von Willebrand factor A domain-containing protein 8	VWA8
27.1451	27.1864	27.224	26.4663	26.3036	26.2374	Predicted mitochondrial			+	DSP_Control	2	35.1	49.67	3.53549	-0.849418	-11.839	P07437;Q9BVA1;Q13885	P07437;Q9BVA1;Q13885	Tubulin beta chain;Tubulin beta-2B chain;Tubulin beta-2A chain	TUBB;TUBB2B;TUBB2A
27.5915	27.6315	27.6746	26.7464	26.7268	26.7146	Known mitochondrial		+	+	DSP_Control	13	25.8	57.546	5.40775	-0.903238	-35.1472	P25705-3;P25705;P25705-2	P25705-3;P25705;P25705-2	ATP synthase subunit alpha, mitochondrial	ATP5A1
26.5863	26.9161	26.7886	26.0619	25.744	25.7476	Known mitochondrial		+	+	DSP_Control	7	29.3	30.772	2.51459	-0.912521	-6.40176	P21796	P21796	Voltage-dependent anion-selective channel protein 1	VDAC1
22.1235	21.6848	21.3817	20.7699	20.925	20.7544	Known mitochondrial		+	+	DSP_Control	2	7.6	33.479	1.83307	-0.91361	-4.11376	Q8TB36-2;Q8TB36	Q8TB36-2;Q8TB36	Ganglioside-induced differentiation-associated protein 1	GDAP1
23.3184	23.4451	23.6685	22.6751	22.7534	22.2541	Known mitochondrial		+	+	DSP_Control	5	9.5	61.397	2.1048	-0.916461	-4.933	P00367;P49448;P00367-3;P00367-2	P00367;P49448;P00367-3	Glutamate dehydrogenase 1, mitochondrial;Glutamate dehydrogenase 2, mitochondrial	GLUD1;GLUD2
27.4535	27.2905	27.465	26.3816	26.5757	26.4847	Known mitochondrial		+	+	DSP_Control	5	36.2	32.866	3.50142	-0.922357	-11.6036	P12236;P12235	P12236;P12235	ADP/ATP translocase 3;ADP/ATP translocase 3, N-terminally processed;ADP/ATP translocase 1	SLC25A6;SLC25A4
22.1167	21.8986	21.4542	19.5445	21.5601	21.5708	Known mitochondrial		+			2	12.7	18.192	0.593692	-0.93136	-1.32808	Q9UIJ7-2;Q9UIJ7-3;Q9UIJ7	Q9UIJ7-2;Q9UIJ7-3;Q9UIJ7	GTP:AMP phosphotransferase AK3, mitochondrial	AK3
27.0522	26.8608	27.0764	26.1703	26.0347	25.9484	Known mitochondrial		+	+	DSP_Control	18	26	80.852	3.26122	-0.945356	-10.0654	P43304;P43304-2	P43304;P43304-2	Glycerol-3-phosphate dehydrogenase, mitochondrial	GPD2
23.873	21.5735	24.1329	22.1927	22.2113	22.3361	Predicted mitochondrial					1	26.3	17.149	0.508805	-0.946412	-1.1619	P15531;P15531-2;O60361	P15531;P15531-2;O60361	Nucleoside diphosphate kinase A;Putative nucleoside diphosphate kinase	NME1;NME2P1
28.6978	28.8507	28.7174	27.7822	27.7573	27.7898	Known mitochondrial		+	+	DSP_Control	17	33.6	73.68	4.43073	-0.978858	-19.9716	P38646	P38646	Stress-70 protein, mitochondrial	HSPA9
26.1803	26.3048	26.1655	25.2909	25.2388	25.1331	Known mitochondrial		+	+	DSP_Control	7	21	49.282	3.99974	-0.995938	-15.5417	P09622-3;P09622;P09622-2	P09622-3;P09622;P09622-2	Dihydrolipoyl dehydrogenase, mitochondrial	DLD
25.3502	25.2895	25.4964	24.3215	24.3751	24.3345	Known mitochondrial		+	+	DSP_Control	5	34.2	32.852	4.08196	-1.035	-16.3051	P05141;Q9H0C2	P05141	ADP/ATP translocase 2;ADP/ATP translocase 2, N-terminally processed	SLC25A5
21.999	22.8683	21.8292	21.0224	21.1867	21.2473	Known mitochondrial		+	+	DSP_Control	2	7.5	38.632	1.51784	-1.08002	-3.28527	P09001	P09001	39S ribosomal protein L3, mitochondrial	MRPL3
22.6381	22.2033	21.9469	21.1855	21.1105	20.9589	Known mitochondrial		+	+	DSP_Control	2	9.1	28.823	2.2859	-1.17782	-5.54391	O75431-2;O75431	O75431-2;O75431	Metaxin-2	MTX2
22.0312	22.1006	21.5761	21.3723	21.1714	19.3603	Known mitochondrial		+			3	10.7	41.887	0.894997	-1.26801	-1.91946	O43837-2;O43837;O43837-3	O43837-2;O43837;O43837-3	Isocitrate dehydrogenase [NAD] subunit beta, mitochondrial	IDH3B
26.716	26.8734	26.7431	25.4122	25.5723	25.535	Known mitochondrial		+	+	DSP_Control	17	29.1	82.999	4.3023	-1.27101	-18.536	P40939	P40939	Trifunctional enzyme subunit alpha, mitochondrial;Long-chain enoyl-CoA hydratase;Long chain 3-hydroxyacyl-CoA dehydrogenase	HADHA
23.0542	23.6424	24.5405	22.2145	23.1286	21.9872	Known mitochondrial		+			4	18.2	29.668	1.10262	-1.30227	-2.34488	P47985;P0C7P4	P47985;P0C7P4	Cytochrome b-c1 complex subunit Rieske, mitochondrial;Cytochrome b-c1 complex subunit 11;Putative cytochrome b-c1 complex subunit Rieske-like protein 1	UQCRFS1;UQCRFS1P1
25.2093	25.8682	25.8495	24.501	24.2806	24.1763	Predicted mitochondrial			+	DSP_Control	14	11.5	229	2.29814	-1.32301	-5.58728	P35580;P35580-3;P35580-5;P35580-2;P35580-4	P35580;P35580-3;P35580-5;P35580-2;P35580-4	Myosin-10	MYH10
29.6512	29.5917	29.7445	28.4613	28.293	28.2437	Known mitochondrial		+	+	DSP_Control	13	48.5	35.503	4.12618	-1.32979	-16.7307	P40926;P40926-2	P40926;P40926-2	Malate dehydrogenase, mitochondrial	MDH2
22.3565	22.024	21.7698	20.5795	20.8684	20.6573	Known mitochondrial		+	+	DSP_Control	2	7.7	28.202	2.67694	-1.34835	-7.07696	Q9BVV7	Q9BVV7	Mitochondrial import inner membrane translocase subunit Tim21	TIMM21
26.2283	26.5039	26.2664	24.7786	25.0181	25.0477	Known mitochondrial		+	+	DSP_Control	14	17.1	113.79	3.47539	-1.38473	-11.4267	Q9NSE4	Q9NSE4	Isoleucine--tRNA ligase, mitochondrial	IARS2
23.0169	23.0863	22.988	21.6006	21.6686	21.632	Known mitochondrial		+	+	DSP_Control	4	28.8	14.226	5.61856	-1.39662	-39.6934	P82932	P82932	28S ribosomal protein S6, mitochondrial	MRPS6
24.0812	24.0618	24.0175	22.52	22.7564	22.6247	Known mitochondrial		+	+	DSP_Control	5	15.1	41.924	4.4346	-1.41978	-20.0166	P42765	P42765	3-ketoacyl-CoA thiolase, mitochondrial	ACAA2
28.6995	28.7323	28.6555	27.1874	27.2313	27.2276	Known mitochondrial			+	DSP_Control	9	32.5	41.792	6.22296	-1.48032	-56.2405	P63261;P60709;P68133;P68032;Q6S8J3;A5A3E0;P63267;P62736;P0CG38;P63267-2;Q9BYX7;P0CG39	P63261;P60709;P68133;P68032;Q6S8J3;A5A3E0	Actin, cytoplasmic 2;Actin, cytoplasmic 2, N-terminally processed;Actin, cytoplasmic 1;Actin, cytoplasmic 1, N-terminally processed;Actin, alpha skeletal muscle;Actin, alpha cardiac muscle 1;POTE ankyrin domain family member E;POTE ankyrin domain family member F	ACTG1;ACTB;ACTA1;ACTC1;POTEE;POTEF
21.7547	22.6738	21.6684	20.7558	20.2996	20.5908	Known mitochondrial		+	+	DSP_Control	2	10.2	22.184	1.88421	-1.48361	-4.25984	Q9NVS2;Q9NVS2-2;Q9NVS2-3	Q9NVS2;Q9NVS2-2;Q9NVS2-3	28S ribosomal protein S18a, mitochondrial	MRPS18A
21.429	21.98	22.5477	20.406	20.4665	20.5637	Known mitochondrial		+	+	DSP_Control	2	3.6	70.737	2.00503	-1.5068	-4.6195	Q969Z0;Q969Z0-2	Q969Z0;Q969Z0-2	Protein TBRG4	TBRG4
25.724	26.3794	25.9237	24.4789	24.3363	24.5198	Predicted mitochondrial			+	DSP_Control	7	13.6	70.897	2.82631	-1.56406	-7.75248	P11142;P11142-2;P54652;P0DMV8-2;P34931;P0DMV9;P0DMV8	P11142;P11142-2;P54652	Heat shock cognate 71 kDa protein;Heat shock-related 70 kDa protein 2	HSPA8;HSPA2
25.6973	26.0712	25.9568	24.4307	24.265	24.3358	Known mitochondrial		+	+	DSP_Control	7	23.4	40.188	3.69125	-1.56456	-12.9747	P08559-3;P08559;P08559-2;P08559-4;P29803	P08559-3;P08559;P08559-2;P08559-4	Pyruvate dehydrogenase E1 component subunit alpha, somatic form, mitochondrial	PDHA1
21.7023	22.664	23.3264	20.912	21.0218	21.0584	Known mitochondrial		+	+	DSP_Control	4	4.5	105.79	1.52745	-1.56685	-3.30886	Q6UB35;Q6UB35-2	Q6UB35	Monofunctional C1-tetrahydrofolate synthase, mitochondrial	MTHFD1L
27.9733	27.8604	27.998	26.4051	26.321	26.3742	Known mitochondrial		+	+	DSP_Control	9	48.4	30.412	5.2567	-1.57713	-32.2118	P45880-2;P45880;P45880-1	P45880-2;P45880;P45880-1	Voltage-dependent anion-selective channel protein 2	VDAC2
21.3458	22.295	22.8193	21.2789	19.0049	21.3942	Known mitochondrial		+			2	15.2	24.279	0.830963	-1.59402	-1.79214	Q9HAV7	Q9HAV7	GrpE protein homolog 1, mitochondrial	GRPEL1
21.9857	23.3403	22.2595	21.0957	20.0616	21.5524	Known mitochondrial		+			3	3	129.44	1.26164	-1.62527	-2.68844	Q7L2E3-3;Q7L2E3;Q7L2E3-2	Q7L2E3-3;Q7L2E3;Q7L2E3-2	Putative ATP-dependent RNA helicase DHX30	DHX30
27.3775	27.414	27.4221	25.7258	25.7467	25.821	Known mitochondrial		+	+	DSP_Control	11	63.6	26.923	6.06171	-1.64005	-51.2497	Q99714;Q99714-2	Q99714;Q99714-2	3-hydroxyacyl-CoA dehydrogenase type-2	HSD17B10
25.0922	24.8065	24.6102	23.2359	23.104	23.2107	Known mitochondrial		+	+	DSP_Control	4	11.2	38.711	3.46341	-1.65276	-11.3462	Q9NYK5;Q9NYK5-2	Q9NYK5;Q9NYK5-2	39S ribosomal protein L39, mitochondrial	MRPL39
23.0185	22.1712	22.6128	20.8794	21.1064	20.8402	Known mitochondrial		+	+	DSP_Control	2	7.8	29.395	2.5194	-1.65884	-6.42095	Q9Y676	Q9Y676	28S ribosomal protein S18b, mitochondrial	MRPS18B
22.9382	23.8334	22.9045	22.5254	19.9247	22.1986	Known mitochondrial		+			3	10.2	48.039	0.895469	-1.67582	-1.9204	Q9P2R7-2;Q9P2R7	Q9P2R7-2;Q9P2R7	Succinyl-CoA ligase [ADP-forming] subunit beta, mitochondrial	SUCLA2
22.1906	22.107	24.0992	22.5764	18.0867	22.4405	Known mitochondrial		+			2	16.2	15.521	0.474839	-1.76443	-1.09484	Q9NS69	Q9NS69	Mitochondrial import receptor subunit TOM22 homolog	TOMM22
28.7484	28.861	28.8414	27.1333	27.0655	26.902	Known mitochondrial		+	+	DSP_Control	25	32.7	85.95	4.68699	-1.78333	-23.1709	Q8TCS8	Q8TCS8	Polyribonucleotide nucleotidyltransferase 1, mitochondrial	PNPT1
23.7211	23.0394	23.1245	21.4478	21.3399	21.6843	Predicted mitochondrial			+	DSP_Control	3	14.2	20.762	2.79422	-1.80436	-7.60267	Q02543	Q02543	60S ribosomal protein L18a	RPL18A
26.7298	26.8332	26.8145	25.0415	24.9412	24.8715	Known mitochondrial		+	+	DSP_Control	11	32.5	52.645	5.21028	-1.84109	-31.3597	P31930	P31930	Cytochrome b-c1 complex subunit 1, mitochondrial	UQCRC1
26.2369	26.3597	26.073	24.532	24.3214	24.2407	Known mitochondrial		+	+	DSP_Control	8	26.3	47.346	3.99167	-1.85852	-15.4687	Q7L0Y3	Q7L0Y3	Mitochondrial ribonuclease P protein 1	TRMT10C
29.749	29.8976	29.8147	27.8811	27.8712	27.8409	Known mitochondrial		+	+	DSP_Control	21	49.6	49.541	5.7888	-1.95602	-43.7886	P49411	P49411	Elongation factor Tu, mitochondrial	TUFM
24.1924	24.1115	23.9478	22.1901	22.1188	21.992	Known mitochondrial		+	+	DSP_Control	5	11.9	54.366	4.55564	-1.98355	-21.4726	O75439	O75439	Mitochondrial-processing peptidase subunit beta	PMPCB
25.9478	26.3152	25.7745	24.0321	23.7928	24.0557	Known mitochondrial		+	+	DSP_Control	8	18.2	67.299	3.47013	-2.05229	-11.3913	P31040-2;P31040;P31040-3	P31040-2;P31040;P31040-3	Succinate dehydrogenase [ubiquinone] flavoprotein subunit, mitochondrial	SDHA
24.8025	24.9115	24.922	22.8169	22.9027	22.7093	Known mitochondrial		+	+	DSP_Control	3	17.1	25.384	5.16414	-2.06907	-30.5351	Q8TAE8	Q8TAE8	Growth arrest and DNA damage-inducible proteins-interacting protein 1	GADD45GIP1
28.2296	28.2382	28.3229	26.1782	26.1989	26.0609	Known mitochondrial		+	+	DSP_Control	5	38.7	15.383	5.65371	-2.11756	-40.5065	Q8IXM3	Q8IXM3	39S ribosomal protein L41, mitochondrial	MRPL41
22.0583	22.1486	24.1991	18.3635	21.8908	21.736	Known mitochondrial		+			3	13.9	24.915	0.727157	-2.13854	-1.58822	Q96A35	Q96A35	39S ribosomal protein L24, mitochondrial	MRPL24
22.1599	21.5876	21.7464	19.2178	20.0979	19.7173	Predicted mitochondrial			+	DSP_Control	2	10.6	27.745	2.66451	-2.15364	-7.02314	P63104;P63104-2	P63104;P63104-2	14-3-3 protein zeta/delta	YWHAZ
26.0899	26.2471	26.0722	23.9738	23.8562	24.0024	Known mitochondrial		+	+	DSP_Control	5	54.2	12.122	5.17489	-2.19228	-30.7253	Q9GZT3-2;Q9GZT3	Q9GZT3-2;Q9GZT3	SRA stem-loop-interacting RNA-binding protein, mitochondrial	SLIRP
25.0903	25.2832	25.0184	22.8593	22.9291	22.9031	Known mitochondrial			+	DSP_Control	7	7.1	226.53	4.97449	-2.23349	-27.365	P35579;P35579-2;Q7Z406;Q7Z406-6;Q7Z406-2;Q7Z406-5;Q7Z406-4	P35579;P35579-2	Myosin-9	MYH9
22.0897	22.2401	22.0089	20.5082	20.3524	18.6599	Known mitochondrial		+	+	DSP_Control	3	16.7	35.777	1.72457	-2.27272	-3.81525	Q13505-3;Q13505-2;Q13505	Q13505-3;Q13505-2;Q13505	Metaxin-1	MTX1
24.4006	22.3394	24.4386	21.3644	21.5787	21.4138	Predicted mitochondrial			+	DSP_Control	6	21.1	22.591	1.50942	-2.27392	-3.26468	P46781	P46781	40S ribosomal protein S9	RPS9
25.4828	25.9504	25.5672	23.3861	23.0397	23.2367	Known mitochondrial		+	+	DSP_Control	3	19.4	13.696	3.81446	-2.44599	-13.9466	P10606	P10606	Cytochrome c oxidase subunit 5B, mitochondrial	COX5B
25.9341	25.6933	25.7748	23.4599	23.2464	23.3258	Predicted mitochondrial		+	+	DSP_Control	5	37.7	16.273	4.89095	-2.4567	-26.0743	P62263	P62263	40S ribosomal protein S14	RPS14
24.8862	25.0493	25.1852	22.5807	22.5408	22.6143	Known mitochondrial		+	+	DSP_Control	3	41.5	12.629	4.9929	-2.46164	-27.6578	Q9Y291	Q9Y291	28S ribosomal protein S33, mitochondrial	MRPS33
24.4457	24.6535	24.8174	21.9941	22.327	22.1285	Known mitochondrial		+	+	DSP_Control	4	13.9	33.419	4.17468	-2.48899	-17.21	Q9P015	Q9P015	39S ribosomal protein L15, mitochondrial	MRPL15
24.9802	24.9394	25.1382	22.4933	22.423	22.4831	Predicted mitochondrial			+	DSP_Control	6	17.1	46.108	5.61459	-2.55282	-39.6028	P39023;Q92901	P39023	60S ribosomal protein L3	RPL3
25.2053	25.3646	25.3529	22.7431	22.8179	22.6259	Known mitochondrial		+	+	DSP_Control	6	16	48.006	5.35066	-2.57863	-34.0078	P82675;P82675-2	P82675	28S ribosomal protein S5, mitochondrial	MRPS5
20.579	21.8566	21.0615	18.5296	18.6153	18.5612	Known mitochondrial		+	+	DSP_Control	1	7.8	19.193	2.64906	-2.59701	-6.95678	Q9Y3E5	Q9Y3E5	Peptidyl-tRNA hydrolase 2, mitochondrial	PTRH2
25.6198	25.5036	25.547	23.1481	22.7246	22.9573	Known mitochondrial		+	+	DSP_Control	3	21.3	22.04	4.48129	-2.61349	-20.5663	P30405;P30405-2;Q9UNP9-2;Q9UNP9;Q9UNP9-3	P30405	Peptidyl-prolyl cis-trans isomerase F, mitochondrial	PPIF
22.6563	22.8759	22.7525	21.0752	20.8441	18.5126	Predicted mitochondrial		+	+	DSP_Control	4	19.1	17.718	1.47818	-2.61763	-3.18886	P62269	P62269	40S ribosomal protein S18	RPS18
26.7935	26.875	26.9606	24.2697	24.2341	23.9611	Known mitochondrial		+	+	DSP_Control	4	19.4	30.658	4.81987	-2.7214	-25.0238	Q9Y277;Q9Y277-2	Q9Y277;Q9Y277-2	Voltage-dependent anion-selective channel protein 3	VDAC3
28.1873	28.1398	28.1983	25.6221	25.3117	25.3668	Known mitochondrial		+	+	DSP_Control	5	33.1	17.259	5.02556	-2.74165	-28.185	Q04837	Q04837	Single-stranded DNA-binding protein, mitochondrial	SSBP1
23.6092	23.5588	24.1683	20.5433	21.3626	21.1489	Known mitochondrial		+	+	DSP_Control	1	10.2	15.139	3.03666	-2.76049	-8.80205	O60783	O60783	28S ribosomal protein S14, mitochondrial	MRPS14
24.1689	24.0052	24.1569	21.5208	21.1852	21.2786	Predicted mitochondrial			+	DSP_Control	4	22.5	24.146	4.79134	-2.78211	-24.6139	P61313;P61313-2	P61313;P61313-2	60S ribosomal protein L15	RPL15
26.8282	27.1625	27.1457	24.1043	24.3394	24.2884	Known mitochondrial		+	+	DSP_Control	6	43.7	23.277	4.56076	-2.80142	-21.5365	P48047	P48047	ATP synthase subunit O, mitochondrial	ATP5O
26.6345	26.6843	26.6063	24.0626	23.6844	23.7192	Known mitochondrial		+	+	DSP_Control	4	27.7	24.49	4.67105	-2.81958	-22.9579	Q9NQ50	Q9NQ50	39S ribosomal protein L40, mitochondrial	MRPL40
23.9532	23.9787	24.249	21.4064	21.2469	21.0259	Predicted mitochondrial			+	DSP_Control	2	8.8	34.362	4.3893	-2.83389	-19.497	P46777	P46777	60S ribosomal protein L5	RPL5
24.7789	24.8342	24.8362	21.8291	21.9068	21.9219	Predicted mitochondrial			+	DSP_Control	2	10.5	28.024	6.94826	-2.93051	-85.4089	P62917	P62917	60S ribosomal protein L8	RPL8
23.7897	23.8144	23.6733	20.3807	21.0611	21.0389	Known mitochondrial		+	+	DSP_Control	2	15.2	15.173	3.68073	-2.93219	-12.8948	O15235	O15235	28S ribosomal protein S12, mitochondrial	MRPS12
28.4496	28.6089	28.6585	25.5742	25.6001	25.5433	Predicted mitochondrial			+	DSP_Control	2	0.7	347.67	5.877	-2.99982	-46.073	Q96RL7-4;Q96RL7-2;Q96RL7-3;Q96RL7	Q96RL7-4;Q96RL7-2;Q96RL7-3;Q96RL7	Vacuolar protein sorting-associated protein 13A	VPS13A
23.7447	23.7261	23.8969	20.7443	20.8791	20.7304	Known mitochondrial		+	+	DSP_Control	3	29	13.711	5.70706	-3.00464	-41.7724	O75380	O75380	NADH dehydrogenase [ubiquinone] iron-sulfur protein 6, mitochondrial	NDUFS6
28.1473	28.1021	28.1013	25.0599	25.0715	25.0074	Known mitochondrial			+	DSP_Control	13	33.6	48.562	7.58726	-3.07068	-123.397	P61978-3;P61978;P61978-2	P61978-3;P61978;P61978-2	Heterogeneous nuclear ribonucleoprotein K	HNRNPK
24.5521	24.5905	24.541	21.4751	21.4704	21.4676	Predicted mitochondrial			+	DSP_Control	3	11.1	32.728	8.4602	-3.0902	-203.972	Q02878	Q02878	60S ribosomal protein L6	RPL6
27.6212	27.6388	27.7067	24.6534	24.4683	24.481	Known mitochondrial		+	+	DSP_Control	9	30.9	29.096	5.94533	-3.12134	-47.9241	Q00059;Q00059-2	Q00059;Q00059-2	Transcription factor A, mitochondrial	TFAM
26.6564	27.1925	26.8119	23.7205	23.8717	23.6001	Known mitochondrial		+	+	DSP_Control	4	26.1	10.165	4.23037	-3.1562	-17.7768	Q9BQ48	Q9BQ48	39S ribosomal protein L34, mitochondrial	MRPL34
27.4701	27.4035	27.3246	24.0127	24.1756	24.093	Known mitochondrial		+	+	DSP_Control	4	35.2	15.947	6.0999	-3.30562	-52.3901	Q6P1L8	Q6P1L8	39S ribosomal protein L14, mitochondrial	MRPL14
25.3112	25.9909	25.6318	22.7003	22.0935	22.1146	Known mitochondrial		+	+	DSP_Control	5	19.4	36.249	3.55275	-3.34182	-11.96	P53597	P53597	Succinyl-CoA ligase [ADP/GDP-forming] subunit alpha, mitochondrial	SUCLG1
26.2438	26.136	26.0008	22.5949	22.4364	22.5219	Known mitochondrial		+	+	DSP_Control	4	28.4	16.073	5.75819	-3.60914	-43.0224	Q9P0M9	Q9P0M9	39S ribosomal protein L27, mitochondrial	MRPL27
22.8276	23.6174	22.5372	19.6324	18.6101	19.7247	Known mitochondrial		+	+	DSP_Control	2	4.8	57.518	2.79959	-3.67165	-7.62759	Q9HCC0-2;Q9HCC0	Q9HCC0-2;Q9HCC0	Methylcrotonoyl-CoA carboxylase beta chain, mitochondrial	MCCC2
29.2456	29.425	29.3063	25.5925	25.6479	25.5161	Known mitochondrial		+	+	DSP_Control	4	29.3	21.405	6.26042	-3.74015	-57.4679	Q9BYC8	Q9BYC8	39S ribosomal protein L32, mitochondrial	MRPL32
27.5527	27.6275	27.6336	23.8304	23.7897	23.8742	Known mitochondrial		+	+	DSP_Control	6	21.2	32.881	7.31979	-3.77318	-105.784	P36542-2;P36542	P36542-2;P36542	ATP synthase subunit gamma, mitochondrial	ATP5C1
23.2141	23.3463	23.3016	19.9829	19.4209	18.7959	Known mitochondrial		+	+	DSP_Control	2	11.7	17.031	3.45163	-3.88748	-11.2675	P30044-2;P30044-3;P30044;P30044-4	P30044-2;P30044-3;P30044;P30044-4	Peroxiredoxin-5, mitochondrial	PRDX5
37.6595	38.0675	37.8579	33.6628	33.5924	33.9278	Known mitochondrial		+	+	DSP_Control	5	70.1	10.998	4.91996	-4.134	-26.5155	O60220	O60220	Mitochondrial import inner membrane translocase subunit Tim8 A	TIMM8A
24.3435	23.9769	24.3025	19.2638	20.3764	20.4044	Known mitochondrial		+	+	DSP_Control	2	5.5	39.958	3.35872	-4.19277	-10.665	Q00325-2;Q00325	Q00325-2;Q00325	Phosphate carrier protein, mitochondrial	SLC25A3
26.9983	27.158	27.1019	22.8591	22.8359	22.52	Known mitochondrial		+	+	DSP_Control	3	29.5	20.459	5.47578	-4.34775	-36.5545	P82912-2;P82912;P82912-3	P82912-2;P82912	28S ribosomal protein S11, mitochondrial	MRPS11
21.7129	25.0364	24.5601	19.3776	18.6864	19.6734	Known mitochondrial		+	+	DSP_Control	5	15.2	45.834	1.86222	-4.524	-4.19659	P82933	P82933	28S ribosomal protein S9, mitochondrial	MRPS9
24.7501	25.6929	25.0774	18.6588	20.5248	21.9874	Predicted mitochondrial		+	+	DSP_Control	3	22.6	24.831	2.05453	-4.78311	-4.77311	P62906	P62906	60S ribosomal protein L10a	RPL10A
25.3065	25.1516	25.2259	18.8977	20.8198	20.3946	Known mitochondrial		+	+	DSP_Control	3	16.5	23.63	3.05112	-5.19062	-8.87878	Q14197	Q14197	Peptidyl-tRNA hydrolase ICT1, mitochondrial	ICT1
24.9524	24.65	25.5632	18.7711	17.924	20.7587	Known mitochondrial		+	+	DSP_Control	3	39.1	10.688	2.58654	-5.90394	-6.69377	P82921	P82921	28S ribosomal protein S21, mitochondrial	MRPS21
25.7264	25.6122	25.3682	20.5903	19.0308	19.0857	Known mitochondrial		+	+	DSP_Control	3	25	15.128	3.48621	-5.99996	-11.4999	Q7Z7F7;Q7Z7F7-2	Q7Z7F7;Q7Z7F7-2	39S ribosomal protein L55, mitochondrial	MRPL55
25.4163	25.5188	25.1696	19.0171	19.6738	18.5605	Known mitochondrial		+	+	DSP_Control	2	17.4	19.206	4.30079	-6.28445	-18.5198	O95881	O95881	Thioredoxin domain-containing protein 12	TXNDC12
26.2394	26.1735	25.9303	19.9	20.1616	19.0188	Predicted mitochondrial			+	DSP_Control	4	11.4	33.216	4.24443	-6.42094	-17.9228	Q9NWB6;Q9NWB6-3;Q9NWB6-2	Q9NWB6;Q9NWB6-3;Q9NWB6-2	Arginine and glutamate-rich protein 1	ARGLU1
26.5034	26.6497	26.702	19.6331	18.8964	18.5715	Known mitochondrial		+	+	DSP_Control	2	17.4	18.546	4.72817	-7.58472	-23.7301	Q8TCC3;Q8TCC3-2;Q8TCC3-3	Q8TCC3;Q8TCC3-2;Q8TCC3-3	39S ribosomal protein L30, mitochondrial	MRPL30

## Sheet: Fold change 3 or more
Galactose	N: -Log Student's T-test p-value DSP_Control	N: Student's T-test Difference DSP_Control	C: Student's T-test Significant DSP_Control	T: Protein IDs	T: Majority protein IDs	T: Protein names	T: Gene names			Glucose	N: -Log Student's T-test p-value DSP crosslinked_Control	N: Student's T-test Difference DSP crosslinked_Control	C: Student's T-test Significant DSP crosslinked_Control	T: Protein IDs	T: Majority protein IDs	T: Protein names	T: Gene names
	4.63521	7.62101	+	Q96HS1;Q96HS1-2	Q96HS1;Q96HS1-2	Serine/threonine-protein phosphatase PGAM5, mitochondrial	PGAM5				3.54536	7.28324	+	Q9Y5L4	Q9Y5L4	Mitochondrial import inner membrane translocase subunit Tim13	TIMM13
	6.11678	7.43115	+	Q9NVI7-2;Q9NVI7;Q9NVI7-3;Q5T9A4-2	Q9NVI7-2;Q9NVI7;Q9NVI7-3	ATPase family AAA domain-containing protein 3A	ATAD3A				3.77428	6.10245	+	Q96HS1	Q96HS1	Serine/threonine-protein phosphatase PGAM5, mitochondrial	PGAM5
	5.81013	6.70127	+	Q9Y5J9	Q9Y5J9	Mitochondrial import inner membrane translocase subunit Tim8 B	TIMM8B				2.96437	5.63046	+	Q9Y5J9	Q9Y5J9	Mitochondrial import inner membrane translocase subunit Tim8 B	TIMM8B
	4.18996	6.36133	+	Q9H078-2;Q9H078;Q9H078-3;Q9H078-4;Q9H078-5	Q9H078-2;Q9H078;Q9H078-3;Q9H078-4;Q9H078-5	Caseinolytic peptidase B protein homolog	CLPB				2.43477	5.29035	+	P35232	P35232	Prohibitin	PHB
	5.63777	6.21956	+	Q9NX63	Q9NX63	MICOS complex subunit MIC19	CHCHD3				3.32387	5.051	+	P54819	P54819	Adenylate kinase 2, mitochondrial;Adenylate kinase 2, mitochondrial, N-terminally processed	AK2
	6.02562	5.84781	+	O60313-13;O60313;O60313-9;O60313-11;O60313-2;O60313-10	O60313-13;O60313;O60313-9;O60313-11;O60313-2;O60313-10	Dynamin-like 120 kDa protein, mitochondrial;Dynamin-like 120 kDa protein, form S1	OPA1				3.05612	5.02556	+	Q16891	Q16891	MICOS complex subunit MIC60	IMMT
	4.19482	5.70327	+	P14854	P14854	Cytochrome c oxidase subunit 6B1	COX6B1				3.32009	5.02013	+	P14854	P14854	Cytochrome c oxidase subunit 6B1	COX6B1
	3.66832	5.56093	+	P54819-2;P54819;P54819-3;P54819-5;P54819-6;P54819-4	P54819-2;P54819;P54819-3;P54819-5;P54819-6;P54819-4	Adenylate kinase 2, mitochondrial;Adenylate kinase 2, mitochondrial, N-terminally processed	AK2				2.93883	5.00125	+	Q9NX63	Q9NX63	MICOS complex subunit MIC19	CHCHD3
	3.2188	5.14141	+	Q07021	Q07021	Complement component 1 Q subcomponent-binding protein, mitochondrial	C1QBP				2.1166	4.98288	+	Q99623	Q99623	Prohibitin-2	PHB2
	2.99884	5.08157	+	Q9NYJ1;Q9NYJ1-2	Q9NYJ1;Q9NYJ1-2	Cytochrome c oxidase assembly factor 4 homolog, mitochondrial	COA4				2.91085	4.85877	+	Q9Y6H1;Q5T1J5	Q9Y6H1;Q5T1J5	Coiled-coil-helix-coiled-coil-helix domain-containing protein 2;Putative coiled-coil-helix-coiled-coil-helix domain-containing protein CHCHD2P9, mitochondrial	CHCHD2;CHCHD2P9
	3.61939	5.07567	+	P42704	P42704	Leucine-rich PPR motif-containing protein, mitochondrial	LRPPRC				2.19274	4.73479	+	Q9NVI7	Q9NVI7	ATPase family AAA domain-containing protein 3A	ATAD3A
	5.55575	4.95562	+	Q9UJS0;Q9UJS0-2;O75746-2;O75746	Q9UJS0;Q9UJS0-2	Calcium-binding mitochondrial carrier protein Aralar2	SLC25A13				2.75105	4.53553	+	Q9UJS0;O75746	Q9UJS0	Calcium-binding mitochondrial carrier protein Aralar2	SLC25A13
	3.95728	4.95035	+	Q96TA2-3;Q96TA2-2;Q96TA2	Q96TA2-3;Q96TA2-2;Q96TA2	ATP-dependent zinc metalloprotease YME1L1	YME1L1				3.07811	3.91566	+	Q96BR5	Q96BR5	Cytochrome c oxidase assembly factor 7	COA7
	3.00658	4.6636	+	Q9Y6H1;Q5T1J5	Q9Y6H1;Q5T1J5	Coiled-coil-helix-coiled-coil-helix domain-containing protein 2;Putative coiled-coil-helix-coiled-coil-helix domain-containing protein CHCHD2P9, mitochondrial	CHCHD2;CHCHD2P9				2.62016	3.89481	+	Q9NYJ1	Q9NYJ1	Cytochrome c oxidase assembly factor 4 homolog, mitochondrial	COA4
	3.83272	4.63202	+	Q96BR5	Q96BR5	Cytochrome c oxidase assembly factor 7	COA7				2.86565	3.82059	+	Q9NR28	Q9NR28	Diablo homolog, mitochondrial	DIABLO
	3.85628	4.38463	+	Q9Y512	Q9Y512	Sorting and assembly machinery component 50 homolog	SAMM50				2.64237	3.77955	+	Q9H078	Q9H078	Caseinolytic peptidase B protein homolog	CLPB
	3.61717	4.16494	+	P99999	P99999	Cytochrome c	CYCS				2.68464	3.73609	+	P07919	P07919	Cytochrome b-c1 complex subunit 6, mitochondrial	UQCRH
	6.03255	4.15866	+	Q5T9A4;Q5T9A4-3	Q5T9A4;Q5T9A4-3	ATPase family AAA domain-containing protein 3B	ATAD3B				1.68355	3.60549	+	O60313	O60313	Dynamin-like 120 kDa protein, mitochondrial;Dynamin-like 120 kDa protein, form S1	OPA1
	3.82559	4.14839	+	P36551;P36551-2	P36551;P36551-2	Oxygen-dependent coproporphyrinogen-III oxidase, mitochondrial	CPOX				2.65317	3.54429	+	P12532;P17540	P12532	Creatine kinase U-type, mitochondrial	CKMT1A
	1.23651	4.13907		Q16891-2;Q16891;Q16891-3	Q16891-2;Q16891;Q16891-3	MICOS complex subunit MIC60	IMMT				2.10345	3.2507	+	P99999;CON__P62894	P99999	Cytochrome c	CYCS
	4.42452	4.11739	+	Q5JTJ3-3;Q5JTJ3;Q5JTJ3-2	Q5JTJ3-3;Q5JTJ3;Q5JTJ3-2	Cytochrome c oxidase assembly factor 6 homolog	COA6				1.47292	3.05856	+	P00505	P00505	Aspartate aminotransferase, mitochondrial	GOT2
	2.70383	4.10662	+	Q96C01	Q96C01	Protein FAM136A	FAM136A				2.59985	3.00374	+	O75390	O75390	Citrate synthase, mitochondrial	CS
	2.40697	4.06477	+	Q9NR28-2;Q9NR28;Q9NR28-3	Q9NR28-2;Q9NR28;Q9NR28-3	Diablo homolog, mitochondrial	DIABLO
	4.07198	4.02182	+	P07919	P07919	Cytochrome b-c1 complex subunit 6, mitochondrial	UQCRH
	3.05156	3.85948	+	P22695	P22695	Cytochrome b-c1 complex subunit 2, mitochondrial	UQCRC2
	2.98937	3.68513	+	Q9Y6C9	Q9Y6C9	Mitochondrial carrier homolog 2	MTCH2
	3.40896	3.54196	+	Q9UJZ1;Q9UJZ1-2	Q9UJZ1;Q9UJZ1-2	Stomatin-like protein 2, mitochondrial	STOML2
	4.23877	3.35994	+	P13073	P13073	Cytochrome c oxidase subunit 4 isoform 1, mitochondrial	COX4I1
	2.34056	3.30793	+	Q4VC31	Q4VC31	Coiled-coil domain-containing protein 58	CCDC58
	2.04379	3.17734	+	Q9NVH1-3;Q9NVH1-2;Q9NVH1	Q9NVH1-3;Q9NVH1-2;Q9NVH1	DnaJ homolog subfamily C member 11	DNAJC11
	4.0225	3.12054	+	Q9BRQ6	Q9BRQ6	MICOS complex subunit MIC25	CHCHD6
	3.08838	3.00414	+	Q14249	Q14249	Endonuclease G, mitochondrial	ENDOG

## Sheet: OXPHOS fold change
	SH-SY5Y hTim8a MUT+hTim8a FLAG : DSP-Crosslinked relative to control
	Gene names	t test difference
		Glucose	Galactose
	OXPHOS
	COX6B1	5.02013	5.70327
	COA4	3.89481	5.08157
	COA7	3.91566	4.63202
	COA6	1.66261	4.11739
	COX4I1	1.61831	3.35994
	SCO1	1.03733	1.70111
	CYCS	3.2507	4.16494
	UQCRH	3.73609	4.02182
	UQCRC2	0.118661	3.85948
	small TIM
	TIMM8B	5.63046	6.70127
	TIMM13	7.28324	0.82671
	MICOS
	IMMT	5.02556	4.13907
Glucose	T: Gene names	N: Student's T-test Difference DSP crosslinked_Control	C: Student's T-test Significant DSP crosslinked_Control	T: Protein IDs	T: Protein names
	TIMM13	7.28324	+	Q9Y5L4	Mitochondrial import inner membrane translocase subunit Tim13
	TIMM8B	5.63046	+	Q9Y5J9	Mitochondrial import inner membrane translocase subunit Tim8 B
	COX6B1	5.02013	+	P14854	Cytochrome c oxidase subunit 6B1
	COA7	3.91566	+	Q96BR5	Cytochrome c oxidase assembly factor 7
	COA4	3.89481	+	Q9NYJ1	Cytochrome c oxidase assembly factor 4 homolog, mitochondrial
	UQCRH	3.73609	+	P07919	Cytochrome b-c1 complex subunit 6, mitochondrial
	CYCS	3.2507	+	P99999;CON__P62894	Cytochrome c
Galactose	T: Gene names	N: Student's T-test Difference DSP_Control	C: Student's T-test Significant DSP_Control	T: Protein IDs	T: Protein names
	TIMM8B	6.70127	+	Q9Y5J9	Mitochondrial import inner membrane translocase subunit Tim8 B
	COX6B1	5.70327	+	P14854	Cytochrome c oxidase subunit 6B1
	COA4	5.08157	+	Q9NYJ1;Q9NYJ1-2	Cytochrome c oxidase assembly factor 4 homolog, mitochondrial
	COA7	4.63202	+	Q96BR5	Cytochrome c oxidase assembly factor 7
	CYCS	4.16494	+	P99999	Cytochrome c
	COA6	4.11739	+	Q5JTJ3-3;Q5JTJ3;Q5JTJ3-2	Cytochrome c oxidase assembly factor 6 homolog
	UQCRH	4.02182	+	P07919	Cytochrome b-c1 complex subunit 6, mitochondrial
	UQCRC2	3.85948	+	P22695	Cytochrome b-c1 complex subunit 2, mitochondrial
	COX4I1	3.35994	+	P13073	Cytochrome c oxidase subunit 4 isoform 1, mitochondrial
	TIMM13	0.82671	+	Q9Y5L4	Mitochondrial import inner membrane translocase subunit Tim13
